# Supplementary material for: 2,7-Diazabicyclo[2.2.1]heptanes: novel asymmetric access and controlled bridge-opening
Source: Royal Society of Chemistry journal article supplement (doi:10.1039/c8cc10263e), 2019-01-01
Supplement: c8cc10263e2.pdf [file c8cc10263e2.pdf]

## Supporting Information

# 2,7-Diazabicyclo[2.2.1]heptanes: Novel Asymmetric Access and Controlled Bridge-Opening

Gary R. Peczkowski,<sup>1</sup> Philip G.E. Craven,<sup>1</sup> Darren Stead<sup>2</sup> and Nigel S. Simpkins\*<sup>1</sup>

<sup>1</sup>School of Chemistry, University of Birmingham, Edgbaston, Birmingham, B15 2TT, UK.

<sup>2</sup>AstraZeneca, Darwin Building, Cambridge, CB4 0FZ

Email: n.simpkins@bham.ac.uk

## Contents

|                                                            |      |
|------------------------------------------------------------|------|
| General Methods                                            | S1   |
| Preparation of Catalysts and Reagents                      | S2   |
| Optimisation Tables                                        | S3   |
| General Procedures                                         | S5   |
| Synthesis of Amino Amides <b>S4-S10</b>                    | S7   |
| Synthesis of $\alpha$ -Aryl Triketopiperazines <b>1a-j</b> | S11  |
| Asymmetric Michael Additions <b>2a-q</b>                   | S16  |
| 2,7-diazabicyclo[2.2.1]heptanes <b>4a-m</b>                | S28  |
| Reduction of <b>4a</b>                                     | S36  |
| Formation of Iminium <b>6</b>                              | S37  |
| Synthesis of harmicine amide <b>10</b>                     | S38  |
| References                                                 | S42  |
| $^1\text{H}$ and $^{13}\text{C}$ NMR Spectra               | S43  |
| HPLC Traces                                                | S101 |
| X-ray Crystal Structures                                   | S121 |

## General Methods

All reactions were carried out under an atmosphere of nitrogen and using dry solvents unless otherwise stated. All reagents were used as received from commercial suppliers without further purification.

Microwave reactions were carried out in a CEM Discover-S microwave reactor using 150 Watts in dynamic mode.

The progress of reactions was monitored by thin layer chromatography using Merck silica gel 60 F<sub>254</sub> plates, which were visualized with UV light and potassium permanganate. Flash column chromatography was carried out using Geduran 60 Å silica gel and the indicated solvent systems.

NMR data were recorded on a Bruker AVIII300, AVIII400, AVIII400neo or AVIII500neo spectrometer in deuterated chloroform (unless otherwise indicated) and spectra were calibrated using residual solvent peaks (<sup>1</sup>H = 7.26 ppm; <sup>13</sup>C = 77.16 ppm). The multiplicities of <sup>1</sup>H NMR signals are abbreviated as follows: s (singlet), d (doublet), t (triplet), q (quartet), m (multiplet), br (broad) and combinations thereof.

Mass spectra were recorded on either a Waters Xevo G2-XS Tof or Synapt G2-S mass spectrometer using Zspray in ESI positive mode.

Infrared spectra were recorded on a Perkin Elmer Spectrum 100 FT-IR spectrometer or a Varian 660-IR FT-IR spectrometer using Agilent Resolutions Pro for processing data. Absorption maxima ( $\nu_{\max}$ ) are reported in wavenumbers (cm<sup>-1</sup>).

Melting points were measured using a Gallenkamp melting point apparatus and are uncorrected.

Optical rotations were measured using a Bellingham and Stanley ADP450 Series Peltier polarimeter at 20 °C using the sodium D line (589.3 nm) and the indicated concentration and solvent.

High performance liquid chromatography (HPLC) analysis was performed using an LC-20 prominence system from Shimadzu, Chromeleon client, version 6.80 SR15 Build 4656, Phenomenex Lux Cellulose-1 (250 x 4.6 mm), Phenomenex Lux Cellulose-3 (250 x 4.6 mm), Phenomenex Lux Amylose-2 (250 x 4.6 mm) and Shimadzu SPD-M20A diode Array Detector for the UV detection, monitored at 220 nm or 230 nm.

Some signals in the C-H aromatic region of the <sup>13</sup>C NMR spectra are not observed due to having equivalent resonances.

## Preparation of Catalysts and Reagents

Catalysts **3+S2** were prepared according to literature procedure.<sup>1</sup>

Catalyst **S1** was prepared according to literature procedure.<sup>2</sup>

Catalyst **S3** was commercially available and purchased from Strem Chemicals, inc.

Triketopiperazine **S11** was prepared according to literature procedure.<sup>3</sup>

1,1'-(1,2-Dioxoethane-1,2-diyl)bis-1*H*-benzotriazole (OxBzt) was prepared according to literature procedure.<sup>4</sup>

Phenyl vinyl ketone (PhVK) was prepared according to literature procedure.<sup>5</sup>



## Optimisation Tables

### Asymmetric Michael Additions

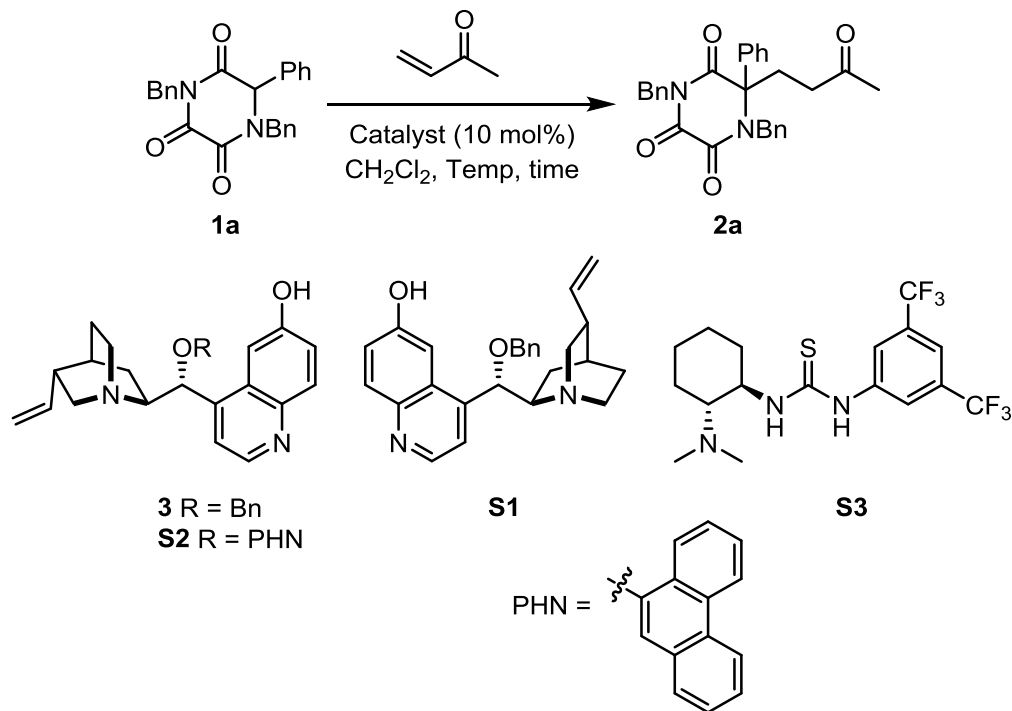

| Entry | Catalyst  | Temp (°C) | Time    | 2a (%) | er    |
|-------|-----------|-----------|---------|--------|-------|
| 1     | <b>3</b>  | r.t.      | 16 h    | 98     | 90:10 |
| 2     | <b>S2</b> | r.t.      | 2 days  | 22     | 77:23 |
| 3     | <b>S3</b> | r.t.      | 4 days  | 37     | 82:18 |
| 4     | <b>S1</b> | r.t.      | 16 h    | 82     | 14:86 |
| 5     | <b>3</b>  | 3         | 16 h    | 90     | 92:8  |
| 6     | <b>3</b>  | -30       | 12 days | 83     | 92:8  |

Figure 1. Optimisation of asymmetric Michael additions

## Reductive Ring Opening

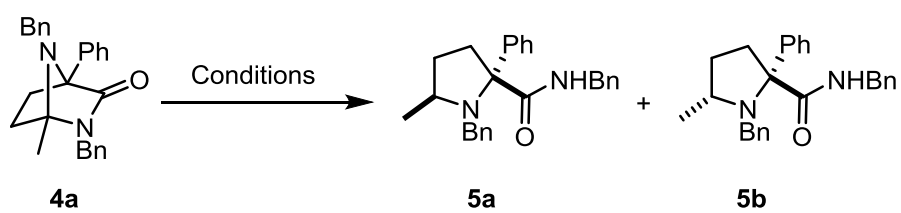

| Entry | Reducing agent                          | dr      |
|-------|-----------------------------------------|---------|
| 1     | NaBH <sub>4</sub>                       | 1.0:3.2 |
| 2     | NaBH <sub>4</sub> /CeCl <sub>3</sub>    | 1.0:2.0 |
| 3     | NaCNBH <sub>3</sub>                     | 1.0:1.8 |
| 4     | Na(OAc) <sub>3</sub> BH                 | 2.7:1.0 |
| 5     | DIBAL                                   | 4.5:1.0 |
| 6     | DIBAL (-78 °C)                          | 6.5:1.0 |
| 7     | L-selectride                            | NR      |
| 8     | LiAlH <sub>4</sub>                      | NR      |
| 9     | H-cube, H <sub>2</sub> Pd/C             | NR      |
| 10    | NH <sub>4</sub> CO <sub>2</sub> H, Pd/C | NR      |

## General Procedures

### General procedure A for the synthesis of amino amides (S6-S8)

To a 2-necked round bottomed flask containing phenylacetic acid derivative (1 eq.) was added thionyl chloride (0.5 M) under a nitrogen atmosphere. The reaction mixture was heated under reflux for 1 hour then allowed to cool to room temperature followed by the addition of NBS (1.5 eq.) and HBr (3 drops). The reaction mixture was then heated at 80 °C for 4 hours. Excess thionyl chloride was removed under reduced pressure and the resulting crude compound was heated with hexane (20 mL), filtered while hot and then washed with hot hexane (4 x 20 mL). The washings were concentrated under reduced pressure to give the crude  $\alpha$ -bromo acid chloride as an oil. The acid chloride was then added dropwise to a solution of benzylamine (5 eq.) in MeCN (1 M) at 0 °C under a nitrogen atmosphere and stirred for 16 hours at room temperature. The reaction mixture was filtered, washed with MeCN and the filtrate was concentrated under reduced pressure. The reaction was purified by flash column chromatography using the indicated solvent system.

### General procedure B for the synthesis of aryl triketopiperazines (1a-g)

To a microwave vial containing a suspension of 1,1'-(1,2-dioxoethane-1,2-diyl)bis-1*H*-benzotriazole (1.5 eq.) in THF (0.2 M) was added *N*-benzyl-2-(benzylamino)-2-phenylacetamide (1 eq.) in THF (0.2 M). The reaction mixture was stirred for 10 minutes then irradiated for 1 hour at 150 °C. The solvent was removed under reduced pressure and the residue was purified by flash column chromatography using the indicated solvent system.

### General procedures Ci and Cii for the racemic and enantioselective Michael additions of $\alpha$ -aryl triketopiperazines (2a-q)

#### General procedure Ci for the racemic Michael additions of $\alpha$ -aryl triketopiperazines (2a-q)

To a solution of triketopiperazine **1a-j** (1 eq.) in CH<sub>2</sub>Cl<sub>2</sub> (0.1 M) was added triethylamine (1 eq.) followed by the Michael acceptor (2.5 eq.) at room temperature. The mixture was left to react until the starting material was consumed. The reaction was directly purified by flash column chromatography using the indicated solvent system.

**General procedure Cii for the enantioselective Michael additions of  $\alpha$ -aryl triketopiperazines (2a-q)**

To a mixture of triketopiperazine **1a-j** (1 eq.) and catalyst **3** (10 mol%) in CH<sub>2</sub>Cl<sub>2</sub> (0.1 M) at -78 °C, the Michael acceptor (2.5 eq.) was added neat. The reaction mixture was allowed to warm to 3 °C and left to react. After the starting material was consumed the reaction was directly purified by flash column chromatography using the indicated solvent system.

**General procedure D for the synthesis of diazabicycles (4a-m)**

To a solution of triketopiperazine **2a-k, 2n and 2q** (1 eq.) in THF (0.2 M) was added ethanolamine (0.2 M). The reaction mixture was heated under reflux for 1 hour. The reaction mixture was concentrated under reduced pressure and directly purified by flash column chromatography using the indicated solvent system.

## Synthesis of Amino Amides (S4-S10)

### *N*-benzyl-2-(benzylamino)-2-phenylacetamide **S4**

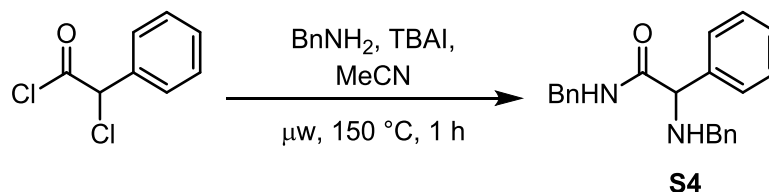

To a microwave vial containing a solution of benzylamine (0.55 mL, 5 mmol) in MeCN (4 mL) was added  $\alpha$ -chlorophenylacetyl chloride (0.16 mL, 1 mmol) dropwise at 0 °C. TBAI (185 mg, 0.5 mmol) dissolved in MeCN (1 mL) was added and the reaction mixture was irradiated for 1 hour in the microwave at 150 °C. The reaction mixture was filtered, washed with MeCN (5 mL) and the filtrate concentrated under reduced pressure. The resulting oil was purified by flash column chromatography on silica gel (gradient: hexane:EtOAc = (1:0) to (2:1)) to afford **S4** (307 mg, 93%) as an orange oil.

**IR**  $\nu_{\max}/\text{cm}^{-1}$  3302, 3061, 3028, 2845, 1657, 1515, 1453, 1028, 730, 694;  **$^1\text{H}$  NMR** (300 MHz,  $\text{CDCl}_3$ )  $\delta$  7.52 – 7.19 (m, 16H), 4.46 (d,  $J$  = 5.9 Hz, 2H), 4.30 (s, 1H), 3.77 (s, 2H), 2.05 (br s, 1H);  **$^{13}\text{C}$  NMR** (101 MHz,  $\text{CDCl}_3$ )  $\delta$  172.0, 139.3, 139.2, 138.5, 129.0, 128.8, 128.7, 128.3, 127.8, 127.6, 127.5, 127.5, 67.1, 52.7, 43.4;  **$m/z$**  (ES HRMS)  $\text{C}_{22}\text{H}_{23}\text{N}_2\text{O}$  requires 331.1810, found  $[\text{MH}]^+$  331.1813.

### *N*-benzyl-2-(benzylamino)-2-(4-methoxyphenyl)acetamide **S5**

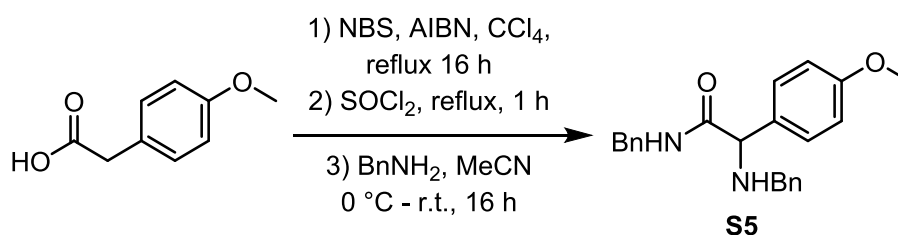

To a 2-necked round bottomed flask containing 4-methoxyphenylacetic acid (1.81 g, 10 mmol), NBS (1.87 g, 10.5 mmol) and AIBN (330 mg, 2 mmol) was added  $\text{CCl}_4$  (15 mL). The reaction mixture was heated under reflux for 16 hours then allowed to cool to room temperature, filtered, washed with  $\text{CCl}_4$  and concentrated under reduced pressure. To the resulting oil was added thionyl chloride (15 mL) and the reaction mixture was heated under reflux for 1 hour. The solvent was removed under reduced pressure to give crude 2-bromo-2-(4-methoxyphenyl)acetyl chloride as an orange oil. The crude product was diluted with MeCN (5 mL) and added dropwise to a solution of benzylamine (5.4 mL, 50 mmol) in MeCN

(50 mL) at 0 °C and stirred for 16 hours at room temperature. The reaction mixture was filtered, washed with MeCN (10 mL) and the filtrate was concentrated under reduced pressure. The resulting oil was purified by flash column chromatography on silica gel (gradient: hexane:EtOAc = (4:1) to (1:1)) to afford **S5** (1.79 g, 50%) as an orange oil.

**IR**  $\nu_{\max}/\text{cm}^{-1}$  3289, 3030, 2931, 2838, 1511, 1453, 1251, 1177, 1026, 751, 694; **<sup>1</sup>H NMR** (400 MHz, CDCl<sub>3</sub>)  $\delta$  7.42 (br s, 1H), 7.35 – 7.18 (m, 12H), 6.87 (d,  $J$  = 8.4 Hz, 2H), 4.46 (d,  $J$  = 5.9 Hz, 2H), 4.25 (s, 1H), 3.80 (s, 3H), 3.75 (d,  $J$  = 3.5 Hz, 2H) 1.80 (br s, 1H); **<sup>13</sup>C NMR** (101 MHz, CDCl<sub>3</sub>)  $\delta$  172.4, 159.6, 139.4, 138.5, 131.5, 128.8, 128.7, 128.6, 128.3, 127.8, 127.6, 127.5, 114.4, 66.5, 55.5, 52.6, 43.4;  **$m/z$**  (ESI HRMS) C<sub>23</sub>H<sub>24</sub>N<sub>2</sub>O<sub>2</sub>Na requires 383.1735, found [MNa]<sup>+</sup> 383.1732.

#### *N*-benzyl-2-(benzylamino)-2-(4-nitrophenyl)acetamide **S6**

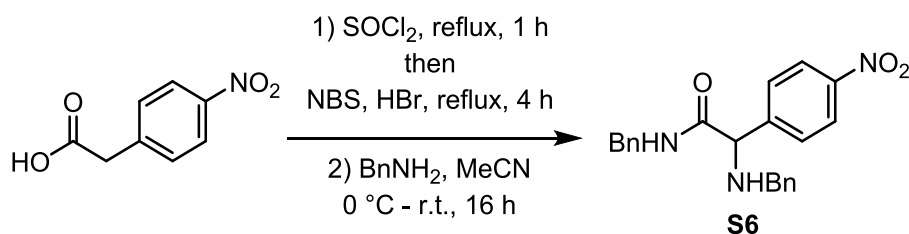

Following procedure **A** using 4-nitrophenylacetic acid (1.81 g, 10 mmol), NBS (2.67 g, 15 mmol), HBr (3 drops) and benzylamine (5.4 mL, 50 mmol). The resulting oil was purified by flash column chromatography on silica gel (gradient: hexane:EtOAc = (1:0) to (2:1)) to afford **S6** (1.85 g, 68%) as an orange oil.

**IR**  $\nu_{\max}/\text{cm}^{-1}$  3347, 3258, 3033, 2933, 2846, 1668, 1519, 1452, 1343, 750, 734, 689; **<sup>1</sup>H NMR** (300 MHz, CDCl<sub>3</sub>)  $\delta$  8.23 – 8.16 (m, 2H), 7.57 – 7.53 (m, 2H), 7.45 (br s, 1H), 7.37 – 7.19 (m, 10H), 4.45 (d,  $J$  = 5.9 Hz, 2H), 4.40 (s, 1H), 3.77 (s, 2H), 2.06 (br s, 1H); **<sup>13</sup>C NMR** (101 MHz, CDCl<sub>3</sub>)  $\delta$  170.6, 147.8, 146.3, 138.6, 138.0, 128.9, 128.8, 128.4, 128.3, 127.8, 124.1, 66.3, 52.4, 43.5;  **$m/z$**  (ES HRMS) C<sub>22</sub>H<sub>22</sub>N<sub>3</sub>O<sub>3</sub> requires 376.1661, found [MH]<sup>+</sup> 376.1665.

#### *N*-benzyl-2-(benzylamino)-2-(4-bromophenyl)acetamide **S7**

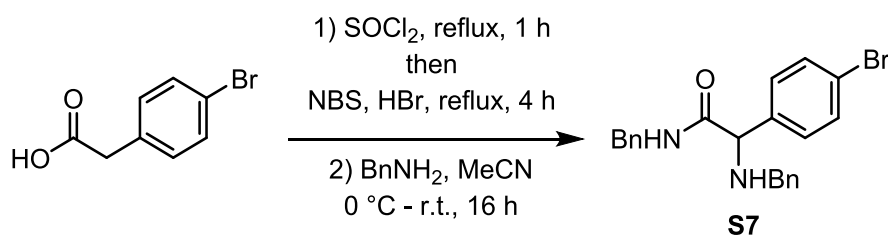

Following general procedure **A** using 4-bromophenylacetic acid (860 mg, 4 mmol), NBS (1 g, 6 mmol), HBr (3 drops) and benzylamine (2.2 mL, 20 mmol). The resulting oil was purified by flash column chromatography on silica gel (gradient: hexane:EtOAc = (9:1) to (2:1)) to afford **S7** (708 mg, 45%) as an orange oil.

**IR**  $\nu_{\text{max}}/\text{cm}^{-1}$  3299, 3062, 3028, 2924, 2848, 1652, 1517, 1486, 1453, 1071, 1010, 907, 727, 696;  **$^1\text{H NMR}$**  (400 MHz,  $\text{CDCl}_3$ )  $\delta$  7.54 – 7.46 (m, 3H), 7.38 – 7.22 (m, 12H), 4.46 (d,  $J$  = 6.0 Hz, 2H), 4.27 (s, 1H), 3.77 (s, 2H), 2.06 (br s, 1H);  **$^{13}\text{C NMR}$**  (101 MHz,  $\text{CDCl}_3$ )  $\delta$  171.5, 139.0, 138.3, 132.0, 129.1, 128.8, 128.7, 128.2, 127.7, 127.6, 127.5, 122.2, 66.3, 52.4, 43.3;  **$m/z$**  (ES HRMS)  $\text{C}_{22}\text{H}_{22}\text{N}_2\text{OBr}$  requires 409.0916, found  $[\text{MH}]^+$  409.0924.

#### *N*-benzyl-2-(benzylamino)-2-(2-bromophenyl)acetamide **S8**

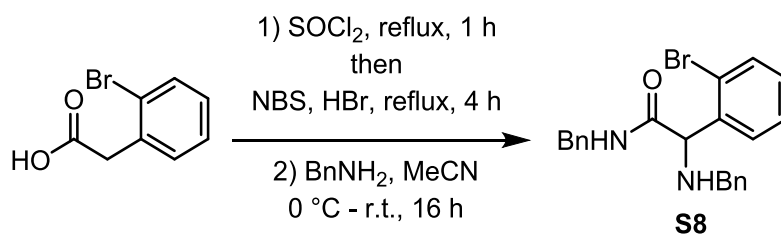

Following general procedure **A** using 2-bromophenylacetic acid (430 mg, 2 mmol), NBS (530 mg, 3 mmol), HBr (3 drops) and benzylamine (1.1 mL, 10 mmol). The resulting oil was purified by flash column chromatography on silica gel (gradient: hexane:EtOAc = (9:1) to (2:1)) to afford **S8** (474 mg, 58%) as an orange oil.

**IR**  $\nu_{\text{max}}/\text{cm}^{-1}$  3315, 3061, 3027, 2922, 2844, 1658, 1514, 1453, 1080, 1025, 748, 697;  **$^1\text{H NMR}$**  (400 MHz,  $\text{CDCl}_3$ )  $\delta$  7.61 – 7.49 (m, 2H), 7.38 – 7.22 (m, 12H), 7.20 – 7.14 (m, 1H), 4.69 (s, 1H), 4.51 (dd,  $J$  = 6.0, 2.1 Hz, 2H), 3.85 (d,  $J$  = 12.7 Hz, 1H), 3.71 (d,  $J$  = 12.7 Hz, 1H), 2.27 (br s, 1H);  **$^{13}\text{C NMR}$**  (101 MHz,  $\text{CDCl}_3$ )  $\delta$  171.1, 139.1, 138.5, 138.2, 133.4, 129.8, 129.6, 128.7, 128.6, 128.3, 127.9, 127.8, 127.5, 127.4, 124.3, 65.8, 52.6, 43.4;  **$m/z$**  (ES HRMS)  $\text{C}_{22}\text{H}_{22}\text{N}_2\text{OBr}$  requires 409.0916, found  $[\text{MH}]^+$  409.0911.

#### *N*-benzyl-2-(benzylamino)-2-(furan-2-yl)acetamide **S9**

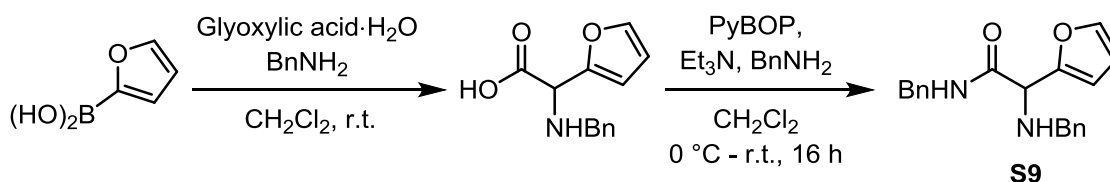

To a solution of glyoxylic acid monohydrate (460 mg, 5 mmol) in  $\text{CH}_2\text{Cl}_2$  (33 mL) was added benzylamine (0.55 mL, 5 mmol) and 2-furylboronic acid (560 mg, 5 mmol). The flask was

purged with argon and stirred at room temperature for 4 hours. The resulting precipitate was filtered, dried under reduced pressure and used without further purification. To a round bottomed flask containing the crude amino acid was added  $\text{CH}_2\text{Cl}_2$  (25 mL) and the reaction mixture was cooled to 0 °C, followed by the addition of PyBOP (2.8 g, 5.5 mmol), triethylamine (1.1 mL, 7.5 mmol) and benzylamine (1.4 mL, 12.5 mmol). The reaction mixture was allowed to warm to room temperature and was stirred for 16 hours. The reaction mixture was concentrated under reduced pressure and the residue was purified by flash column chromatography on silica gel (gradient: hexane:EtOAc = (9:1) to (2:1)) to afford **S9** (1.24 g, 78%) as an orange oil.

**IR**  $\nu_{\text{max}}/\text{cm}^{-1}$  3304, 3061, 3028, 2924, 2849, 1657, 1520, 1496, 1453, 1147, 1073, 1010, 734, 697;  **$^1\text{H NMR}$**  (400 MHz,  $\text{CDCl}_3$ )  $\delta$  7.55 (br s, 1H), 7.38 (dd,  $J = 1.9, 0.9$  Hz, 1H), 7.36 – 7.23 (m, 10H), 6.38 – 6.29 (m, 2H), 4.50 (d,  $J = 5.9$  Hz, 2H), 4.40 (s, 1H), 3.82 (d,  $J = 13.1$  Hz, 1H), 3.74 (d,  $J = 13.1$  Hz, 1H);  **$^{13}\text{C NMR}$**  (101 MHz,  $\text{CDCl}_3$ )  $\delta$  169.9, 151.6, 142.6, 139.0, 138.3, 128.8, 128.7, 128.4, 127.8, 127.6, 127.6, 110.7, 108.5, 60.4, 52.4, 43.5;  **$m/z$**  (ES HRMS)  $\text{C}_{20}\text{H}_{21}\text{N}_2\text{O}_2$  requires 321.1603, found  $[\text{MH}]^+$  321.1604.

#### *N*-benzyl-2-(benzylamino)-2-(thiophen-2-yl)acetamide **S10**

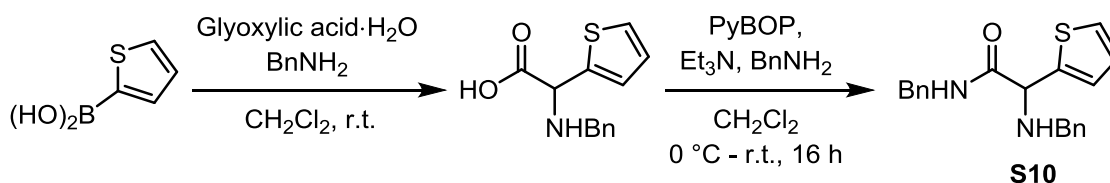

To a solution of glyoxylic acid monohydrate (368 mg, 4 mmol) in  $\text{CH}_2\text{Cl}_2$  (26 mL) was added benzylamine (0.44 mL, 4 mmol) and 2-thiopheneboronic acid (512 mg, 4 mmol). The flask was purged with argon and stirred at room temperature for 72 hours. The resulting precipitate was filtered, dried under reduced pressure and used without further purification. To a round bottomed flask containing the crude amino acid was added  $\text{CH}_2\text{Cl}_2$  (20 mL) and the reaction mixture was cooled to 0 °C, followed by the addition of PyBOP (2.3 g, 4.4 mmol), triethylamine (0.84 mL, 6 mmol) and benzylamine (1.1 mL, 10 mmol). The reaction mixture was allowed to warm to room temperature and stirred for 16 hours. The reaction mixture was concentrated under reduced pressure and the residue was purified by flash column chromatography on silica gel (gradient: hexane:EtOAc = (9:1) to (2:1)) to afford **S10** (749 mg, 56%) as an orange oil.

**IR**  $\nu_{\text{max}}/\text{cm}^{-1}$  3318, 3061, 2922, 2851, 1654, 1517, 1452, 1359, 1234, 1078, 1028, 847, 731, 694;  **$^1\text{H NMR}$**  (400 MHz,  $\text{CDCl}_3$ )  $\delta$  7.35 – 7.16 (m, 12H), 7.01 (d,  $J = 3.4$  Hz, 1H), 6.92 (dd,  $J = 5.1, 3.5$  Hz, 1H), 4.54 (s, 1H), 4.40 (d,  $J = 5.9$  Hz, 2H), 3.77 (d,  $J = 13.2$  Hz, 1H), 3.72 (d,  $J = 13.3$  Hz, 1H), 2.27 (br s, 1H);  **$^{13}\text{C NMR}$**  (101 MHz,  $\text{CDCl}_3$ )  $\delta$  171.1, 142.2, 139.0, 138.2, 128.7, 128.6,



128.3, 127.7, 127.5, 127.4, 126.9, 126.0, 125.5, 62.3, 52.3, 43.4; *m/z* (ES HRMS) C<sub>20</sub>H<sub>21</sub>N<sub>2</sub>OS requires 337.1375, found [MH]<sup>+</sup> 337.1372.

## Synthesis of $\alpha$ -Aryl Triketopiperazines (**1a-j**)

1,4-dibenzyl-6-phenylpiperazine-2,3,5-trione **1a**

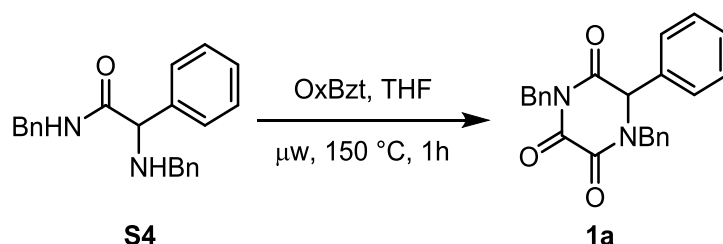

Following general procedure **B** using 1,1'-(1,2-dioxoethane-1,2-diyl)bis-1*H*-benzotriazole (394 mg, 1.35 mmol) in THF (2 mL), *N*-benzyl-2-(benzylamino)-2-phenylacetamide **S4** (307 mg, 0.9 mmol) in THF (3 mL). The residue was purified by flash column chromatography on silica gel (CH<sub>2</sub>Cl<sub>2</sub>) to afford **1a** (247.9 mg, 72%) as a white solid.

**m.p.** 159 – 161 °C; **IR**  $\nu_{\text{max}}$ /cm<sup>-1</sup> 3034, 1748, 1673, 1437, 1253, 1188, 720, 698; **<sup>1</sup>H NMR** (300 MHz, CDCl<sub>3</sub>)  $\delta$  7.48 – 7.18 (m, 15H), 5.57 (d, *J* = 14.5 Hz, 1H), 5.15 (s, 1H), 5.07 (d, *J* = 13.7 Hz, 1H), 4.89 (d, *J* = 13.7 Hz, 1H), 3.63 (d, *J* = 14.4 Hz, 1H); **<sup>13</sup>C NMR** (101 MHz, CDCl<sub>3</sub>)  $\delta$  166.8, 156.4, 153.0, 135.0, 134.1, 134.0, 130.0, 129.8, 129.3, 129.2, 128.9, 128.7, 128.2, 127.0, 63.8, 48.0, 44.7; *m/z* (ESI HRMS) C<sub>24</sub>H<sub>20</sub>N<sub>2</sub>O<sub>3</sub>Na requires 407.1372, found [MNa]<sup>+</sup> 407.1370.

1,4-dibenzyl-6-(4-methoxyphenyl)piperazine-2,3,5-trione **1b**

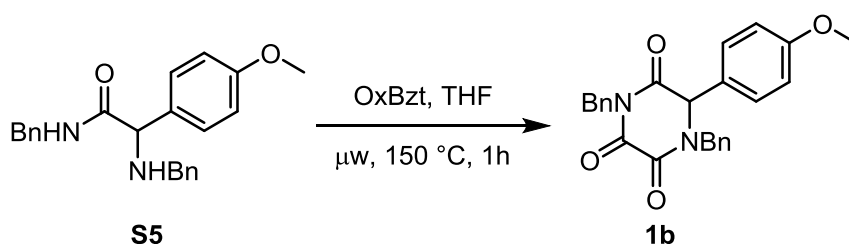

Following general procedure **B** using 1,1'-(1,2-dioxoethane-1,2-diyl)bis-1*H*-benzotriazole (438 mg, 1.5 mmol) in THF (2 mL), *N*-benzyl-2-(benzylamino)-2-(4-methoxyphenyl)acetamide **S5** (360 mg, 1.0 mmol) in THF (3 mL). The residue was purified by column chromatography on silica gel (gradient: CH<sub>2</sub>Cl<sub>2</sub>:acetone = (1:0) to (95:5)) to afford **1b** (117.8 mg, 28%) as a white solid.

**m.p.** 184 – 186 °C; **IR**  $\nu_{\text{max}}/\text{cm}^{-1}$  2966, 2842, 2358, 1749, 1674, 1515, 1352, 1251, 1176, 1022, 831, 728, 695;  **$^1\text{H}$  NMR** (400 MHz,  $\text{CDCl}_3$ )  $\delta$  7.37 – 7.30 (m, 2H), 7.31 – 7.14 (m, 8H), 7.14 – 7.09 (m, 2H), 6.93 – 6.88 (m, 2H), 5.52 (d,  $J = 14.4$  Hz, 1H), 5.08 – 4.99 (m, 2H), 4.85 (d,  $J = 13.7$  Hz, 1H), 3.82 (s, 3H), 3.59 (d,  $J = 14.4$  Hz, 1H);  **$^{13}\text{C}$  NMR** (101 MHz,  $\text{CDCl}_3$ )  $\delta$  167.1, 160.9, 156.5, 153.0, 135.1, 134.1, 129.3, 128.8, 128.7, 128.3, 128.2, 125.8, 115.2, 63.2, 55.6, 47.8, 44.7;  **$m/z$**  (ESI HRMS)  $\text{C}_{25}\text{H}_{22}\text{N}_2\text{O}_4\text{Na}$  requires 437.1477, found  $[\text{MNa}]^+$  437.1482.

#### 1,4-dibenzyl-6-(4-nitrophenyl)piperazine-2,3,5-trione **1c**

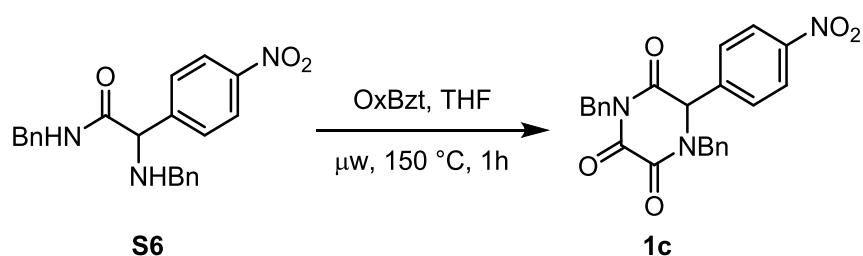

Following general procedure **B** using 1,1'-(1,2-dioxoethane-1,2-diyl)bis-1*H*-benzotriazole (438 mg, 1.5 mmol) in THF (2 mL), *N*-benzyl-2-(benzylamino)-2-(4-nitrophenyl)acetamide **S6** (375 mg, 1.0 mmol) in THF (3 mL). The residue was purified by column chromatography on silica gel ( $\text{CH}_2\text{Cl}_2$ ) to afford **1c** (163 mg, 38%) as a white solid.

**m.p.** 167 – 169 °C; **IR**  $\nu_{\text{max}}/\text{cm}^{-1}$  3089, 3030, 1754, 1684, 1518, 1346, 1254, 976, 727, 702;  **$^1\text{H}$  NMR** (300 MHz,  $\text{CDCl}_3$ )  $\delta$  8.27 – 8.20 (m, 2H), 7.43 – 7.10 (m, 12H), 5.51 (d,  $J = 14.5$  Hz, 1H), 5.23 (s, 1H), 5.02 (d,  $J = 13.6$  Hz, 1H), 4.87 (d,  $J = 13.6$  Hz, 1H), 3.66 (d,  $J = 14.5$  Hz, 1H);  **$^{13}\text{C}$  NMR** (101 MHz,  $\text{CDCl}_3$ )  $\delta$  165.6, 155.8, 152.8, 148.9, 140.9, 134.7, 133.3, 129.5, 129.3, 129.2, 129.2, 128.8, 128.5, 128.2, 124.9, 63.3, 48.6, 45.0;  **$m/z$**  (ESI HRMS)  $\text{C}_{24}\text{H}_{19}\text{N}_3\text{O}_5\text{Na}$  requires 452.1222, found  $[\text{MNa}]^+$  452.1219.

#### 1,4-dibenzyl-6-(4-bromophenyl)piperazine-2,3,5-trione **1d**

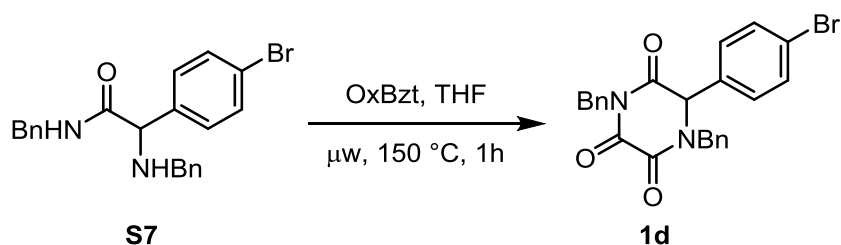

Following general procedure **B** using 1,1'-(1,2-dioxoethane-1,2-diyl)bis-1*H*-benzotriazole (86 mg, 0.30 mmol) in THF (1 mL), *N*-benzyl-2-(benzylamino)-2-(4-bromophenyl)acetamide **S7** (100 mg, 0.25 mmol) in THF (1 mL). The residue was purified by column chromatography on silica gel ( $\text{CH}_2\text{Cl}_2$ ) to afford **1d** (23 mg, 21%) as an off white solid.

**m.p.** 159 – 162 °C; **IR**  $\nu_{\text{max}}/\text{cm}^{-1}$  3028, 2918, 1744, 1676, 1491, 1451, 1434, 1365, 1251, 1188, 1072, 1010, 823, 741, 695;  **$^1\text{H NMR}$**  (400 MHz,  $\text{CDCl}_3$ )  $\delta$  7.56 – 7.50 (m, 2H), 7.37 – 7.31 (m, 3H), 7.28 – 7.20 (m, 5H), 7.19 – 7.12 (m, 2H), 7.10 – 7.05 (m, 2H), 5.51 (d,  $J = 14.5$  Hz, 1H), 5.07 (s, 1H), 5.02 (d,  $J = 13.7$  Hz, 1H), 4.85 (d,  $J = 13.7$  Hz, 1H), 3.60 (d,  $J = 14.5$  Hz, 1H);  **$^{13}\text{C NMR}$**  (101 MHz,  $\text{CDCl}_3$ )  $\delta$  166.3, 156.2, 152.9, 134.9, 133.7, 133.1, 133.0, 129.3, 129.2, 129.0, 128.7, 128.6, 128.4, 124.3, 63.3, 48.1, 44.8;  **$m/z$**  (ES HRMS)  $\text{C}_{24}\text{H}_{19}\text{N}_2\text{O}_3\text{BrNa}$  requires 485.0477, found  $[\text{MNa}]^+$  485.0476.

#### 1,4-dibenzyl-6-(furan-2-yl)piperazine-2,3,5-trione **1e**

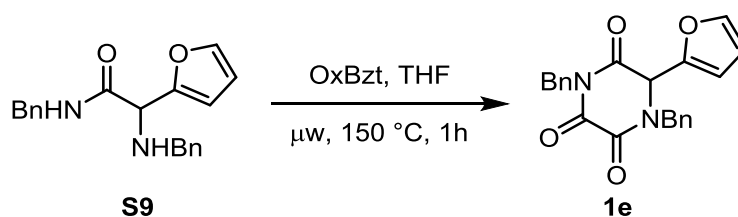

Following general procedure **B** using 1,1'-(1,2-dioxoethane-1,2-diyl)bis-1*H*-benzotriazole (225 mg, 0.77 mmol) in THF (2 mL), *N*-benzyl-2-(benzylamino)-2-(furan-2-yl)acetamide **S9** (204 mg, 0.64 mmol) in THF (2 mL). The residue was purified by column chromatography on silica gel ( $\text{CH}_2\text{Cl}_2$ ) to afford **1e** (94.2 mg, 40%) as an off white solid.

**m.p.** 144 – 146 °C; **IR**  $\nu_{\text{max}}/\text{cm}^{-1}$  3062, 3033, 2925, 1748, 1688, 1496, 1430, 1361, 1255, 1208, 1013, 730, 699;  **$^1\text{H NMR}$**  (400 MHz,  $\text{CDCl}_3$ )  $\delta$  7.30 – 7.11 (m, 11H), 6.34 (dd,  $J = 3.4, 0.8$  Hz, 1H), 6.30 (dd,  $J = 3.3, 1.8$  Hz, 1H), 5.33 (d,  $J = 14.6$  Hz, 1H), 5.10 (s, 1H), 4.99 (d,  $J = 13.9$  Hz, 1H), 4.87 (d,  $J = 13.9$  Hz, 1H), 3.72 (d,  $J = 14.6$  Hz, 1H);  **$^{13}\text{C NMR}$**  (101 MHz,  $\text{CDCl}_3$ )  $\delta$  164.7, 156.4, 153.0, 145.8, 144.3, 135.0, 133.9, 129.2, 129.1, 129.1, 128.8, 128.7, 128.2, 111.6, 111.2, 57.8, 48.0, 44.9;  **$m/z$**  (ES HRMS)  $\text{C}_{22}\text{H}_{18}\text{N}_2\text{O}_4\text{Na}$  requires 397.1164, found  $[\text{MNa}]^+$  397.1166.

#### 1,4-dibenzyl-6-(thiophen-2-yl)piperazine-2,3,5-trione **1f**

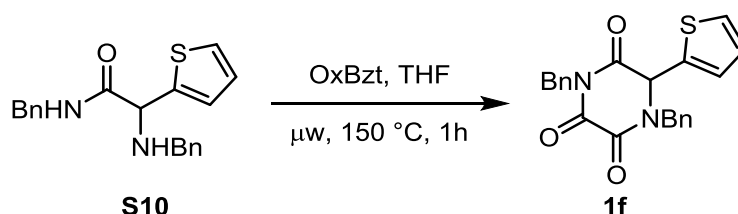

Following general procedure **B** using 1,1'-(1,2-dioxoethane-1,2-diyl)bis-1*H*-benzotriazole (105 mg, 0.36 mmol) in THF (1 mL), *N*-benzyl-2-(benzylamino)-2-(thiophen-2-yl)acetamide **S10** (100 mg, 0.30 mmol) in THF (1 mL). The residue was purified by column chromatography on silica gel ( $\text{CH}_2\text{Cl}_2$ ) to afford **1f** (40 mg, 34%) as an off white solid.

**m.p.** 135 – 137 °C; **IR**  $\nu_{\text{max}}/\text{cm}^{-1}$  3033, 2923, 2853, 1747, 1688, 1495, 1431, 1361, 1253, 1207, 1087, 971, 729, 700;  **$^1\text{H NMR}$**  (400 MHz,  $\text{CDCl}_3$ )  $\delta$  7.39 – 7.23 (m, 11H), 7.06 – 7.02 (m, 2H), 5.56 (d,  $J = 14.6$  Hz, 1H), 5.37 (s, 1H), 5.05 (d,  $J = 13.7$  Hz, 1H), 4.91 (d,  $J = 13.7$  Hz, 1H), 3.81 (d,  $J = 14.5$  Hz, 1H);  **$^{13}\text{C NMR}$**  (101 MHz,  $\text{CDCl}_3$ )  $\delta$  165.9, 156.1, 152.5, 136.9, 134.9, 133.9, 129.3, 129.3, 129.2, 128.9, 128.7, 128.3, 127.9, 127.6, 59.4, 48.0, 44.9;  **$m/z$**  (ES HRMS)  $\text{C}_{22}\text{H}_{18}\text{N}_2\text{O}_3\text{SNa}$  requires 413.0936, found  $[\text{MNa}]^+$  413.0926.

1,4-dibenzyl-6-(2-bromophenyl)piperazine-2,3,5-trione **1g**

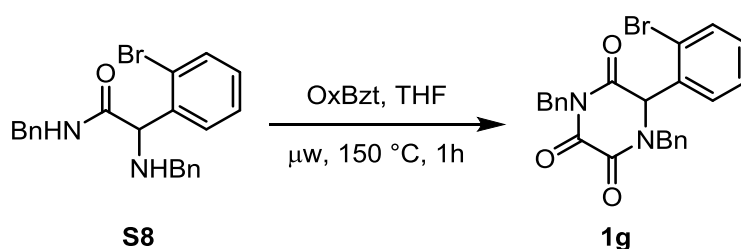

Following general procedure **B** using 1,1'-(1,2-dioxoethane-1,2-diyl)bis-1*H*-benzotriazole (85 mg, 0.30 mmol) in THF (1 mL), *N*-benzyl-2-(benzylamino)-2-(2-bromophenyl)acetamide **S8** (100 mg, 0.25 mmol) in THF (1 mL). The residue was purified by column chromatography on silica gel ( $\text{CH}_2\text{Cl}_2$ ) to afford **1g** (43 mg, 38%) as an off white solid.

**m.p.** 153 – 155 °C; **IR**  $\nu_{\text{max}}/\text{cm}^{-1}$  3062, 3032, 2932, 1744, 1682, 1494, 1429, 1363, 1257, 1190, 1027, 908, 728, 698;  **$^1\text{H NMR}$**  (400 MHz,  $\text{CDCl}_3$ )  $\delta$  7.62 (dd,  $J = 7.7, 1.6$  Hz, 1H), 7.40 – 7.23 (m, 10H), 7.21 – 7.15 (m, 2H), 7.07 (dd,  $J = 7.4, 1.9$  Hz, 1H), 5.64 (br s, 1H), 5.36 (d,  $J = 14.6$  Hz, 1H), 5.07 (d,  $J = 13.6$  Hz, 1H), 4.93 (d,  $J = 13.6$  Hz, 1H), 3.59 (d,  $J = 14.5$  Hz, 1H);  **$^{13}\text{C NMR}$**  (101 MHz,  $\text{CDCl}_3$ )  $\delta$  165.9, 156.3, 153.1, 134.9, 134.6, 134.0, 133.5, 131.4, 129.7, 129.3, 129.1, 128.7, 128.4, 128.3, 124.0, 63.8, 48.2, 44.8;  **$m/z$**  (ES HRMS)  $\text{C}_{24}\text{H}_{19}\text{N}_2\text{O}_3\text{BrNa}$  requires 485.0477, found  $[\text{MNa}]^+$  485.0474.

1,4-dibenzyl-6-(1-methyl-1*H*-pyrrol-2-yl)piperazine-2,3,5-trione **1h** and 1,4-dibenzyl-6-(1-methyl-1*H*-pyrrol-3-yl)piperazine-2,3,5-trione **1i**

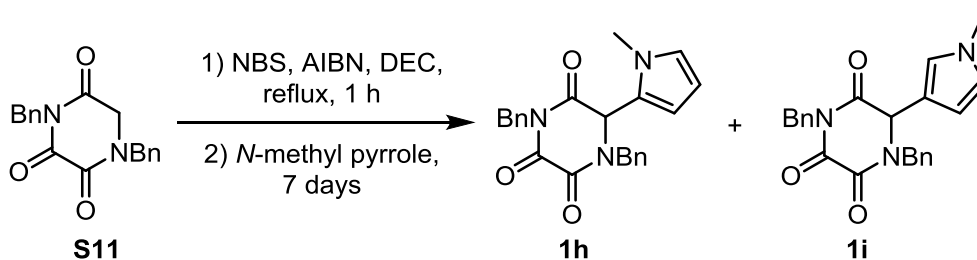

To a round bottomed flask containing triketopiperazine **S11** (100 mg, 0.32 mmol), NBS (87 mg, 0.49 mmol) and AIBN (11 mg, 65  $\mu\text{mol}$ , 20 mol%) was added diethylcarbonate (1.6 mL)

and the reaction mixture was heated under reflux for 1 hour. The reaction mixture was allowed to cool to room temperature, filtered, washed with diethylcarbonate (3 x 2 mL) and the filtrate concentrated under reduced pressure. The crude  $\alpha$ -bromo triketopiperazine was then used without further purification. To the crude residue was added diethylcarbonate (2 mL) and *N*-methyl pyrrole (58  $\mu$ L, 0.65 mmol) and the reaction mixture was stirred for 7 days at room temperature. The reaction mixture was concentrated under reduced pressure and the residue was purified by flash column chromatography on silica gel (gradient: hexane:EtOAc = (9:1) to (2:1)) to afford **1h** (66.6 mg, 52%) as a colourless waxy solid and **1i** (10.4 mg, 8%) as a colourless waxy solid.

1,4-dibenzyl-6-(1-methyl-1H-pyrrol-2-yl)piperazine-2,3,5-trione **1h**

**IR**  $\nu_{\max}/\text{cm}^{-1}$  3062, 3032, 2944, 1745, 1684, 1493, 1427, 1359, 1301, 1251, 1207, 1089, 908, 723, 698; **<sup>1</sup>H NMR** (400 MHz, CDCl<sub>3</sub>)  $\delta$  7.37 – 7.22 (m, 8H), 7.15 – 7.08 (m, 2H), 6.62 (dd, *J* = 2.7, 1.8 Hz, 1H), 6.13 (dd, *J* = 3.8, 2.7 Hz, 1H), 6.06 (dd, *J* = 3.9, 1.7 Hz, 1H), 5.47 (d, *J* = 14.4 Hz, 1H), 5.12 (s, 1H), 5.03 (d, *J* = 13.8 Hz, 1H), 4.86 (d, *J* = 13.9 Hz, 1H), 3.84 (d, *J* = 14.4 Hz, 1H), 3.39 (s, 3H); **<sup>13</sup>C NMR** (101 MHz, CDCl<sub>3</sub>)  $\delta$  166.3, 156.2, 153.1, 135.1, 133.8, 129.4, 129.2, 129.1, 128.8, 128.7, 128.2, 125.3, 124.1, 109.0, 108.3, 56.5, 48.1, 44.6, 34.2; ***m/z*** (ES HRMS) C<sub>23</sub>H<sub>21</sub>N<sub>3</sub>O<sub>3</sub>Na requires 410.1481, found [MNa]<sup>+</sup> 410.1489.

1,4-dibenzyl-6-(1-methyl-1H-pyrrol-3-yl)piperazine-2,3,5-trione **1i**

**IR**  $\nu_{\max}/\text{cm}^{-1}$  3062, 3031, 2942, 1745, 1683, 1495, 1429, 1357, 1253, 1207, 1155, 1088, 1029, 909, 726, 698; **<sup>1</sup>H NMR** (400 MHz, CDCl<sub>3</sub>)  $\delta$  7.36 – 7.29 (m, 5H), 7.28 – 7.21 (m, 5H), 6.55 (t, *J* = 2.5 Hz, 1H), 6.52 (t, *J* = 2.1 Hz, 1H), 5.92 (dd, *J* = 2.8, 1.9 Hz, 1H), 5.48 (d, *J* = 14.5 Hz, 1H), 5.06 – 5.01 (m, 2H), 4.87 (d, *J* = 13.8 Hz, 1H), 3.81 (d, *J* = 14.5 Hz, 1H), 3.60 (s, 3H); **<sup>13</sup>C NMR** (101 MHz, CDCl<sub>3</sub>)  $\delta$  167.8, 156.9, 153.1, 135.3, 134.6, 129.5, 129.3, 129.2, 128.7, 128.6, 128.1, 123.5, 120.7, 117.5, 106.6, 58.2, 47.6, 44.6, 36.6; ***m/z*** (ES HRMS) C<sub>23</sub>H<sub>21</sub>N<sub>3</sub>O<sub>3</sub>Na requires 410.1481, found [MNa]<sup>+</sup> 410.1484.

1,4-dibenzyl-6-(1H-indol-3-yl)piperazine-2,3,5-trione **1j**

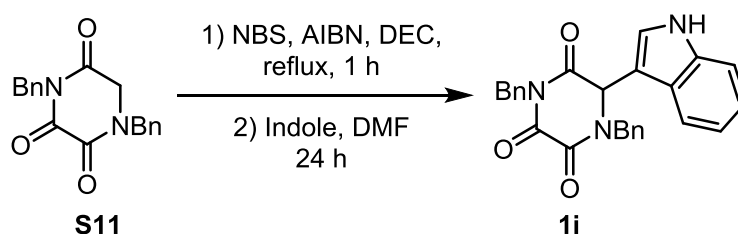

To a round bottomed flask containing triketopiperazine **S11** (308 mg, 1.0 mmol), NBS (267 mg, 1.5 mmol) and AIBN (30 mg, 0.20 mmol, 20 mol%) was added diethylcarbonate (5 mL) and the reaction mixture was heated under reflux for 1 hour. The reaction mixture was allowed to cool to room temperature, filtered, washed with diethylcarbonate (3 x 3 mL) and

the filtrate concentrated under reduced pressure. The crude  $\alpha$ -bromo triketopiperazine was then used without further purification. To the crude residue was added DMF (5 mL) and indole (177 mg, 1.5 mmol) and the reaction mixture was stirred for 24 hours at room temperature. The reaction mixture was diluted with EtOAc (5 mL), washed with water (5  $\times$  10 mL) and brine (10 mL) and the organic layer was dried over MgSO<sub>4</sub> and concentrated under reduced pressure. The residue was purified by flash column chromatography on silica gel (gradient: hexane:EtOAc = (1:0) to (1:1)) to afford **1j** (329 mg, 78%) as a white solid.

**m.p.** 178 – 180 °C; **IR**  $\nu_{\text{max}}/\text{cm}^{-1}$  3270, 3059, 1747, 1691, 1661, 1548, 1494, 1425, 1360, 1272, 1201, 1147, 1100, 1077, 970, 735, 695; **<sup>1</sup>H NMR** (400 MHz, CDCl<sub>3</sub>)  $\delta$  8.56 (s, 1H), 7.46 – 7.37 (m, 2H), 7.36 – 7.08 (m, 13H), 5.54 (d,  $J$  = 14.5 Hz, 1H), 5.45 (s, 1H), 5.08 (d,  $J$  = 13.7 Hz, 1H), 4.88 (d,  $J$  = 13.7 Hz, 1H), 3.79 (d,  $J$  = 14.5 Hz, 1H); **<sup>13</sup>C NMR** (101 MHz, CDCl<sub>3</sub>)  $\delta$  167.1, 156.8, 153.1, 136.7, 135.1, 134.5, 129.4, 129.2, 129.2, 128.7, 128.6, 128.2, 124.9, 124.0, 123.5, 121.2, 118.7, 112.0, 109.8, 57.6, 47.8, 44.8; ***m/z*** (ES HRMS) C<sub>26</sub>H<sub>21</sub>N<sub>3</sub>O<sub>3</sub>Na requires 446.1481, found [MNa]<sup>+</sup> 446.1480.

## Asymmetric Michael Additions (2a-q)

1,4-dibenzyl-6-(3-oxobutyl)-6-phenylpiperazine-2,3,5-trione **2a**

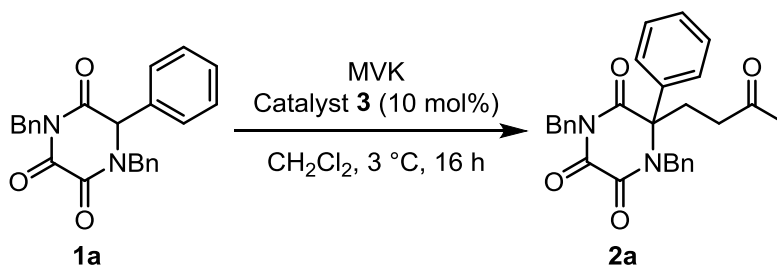

Following general procedure **Cii** using triketopiperazine **1a** (38 mg, 0.10 mmol), chiral catalyst **3** (4 mg, 10  $\mu$ mol, 10 mol%), CH<sub>2</sub>Cl<sub>2</sub> (1 mL) and methyl vinyl ketone (  $\mu$ L, 0.25 mmol). The reaction mixture was purified by flash column chromatography on silica gel (gradient: hexane:EtOAc = (4:1) to (2:1)) to afford **2a** (44.6 mg, 98%) as a colourless oil in 8:92 er as determined by HPLC analysis [Phenomenex Lux Cellulose-1, MeCN:water, 50:50, 1.0 ml/min,  $\lambda$  220 nm,  $t(\text{minor})$  = 20.5 min,  $t(\text{major})$  = 22.4 min].

**IR**  $\nu_{\text{max}}/\text{cm}^{-1}$  3067, 3035, 1744, 1682, 1495, 1419, 1358, 1266, 1144, 1074, 1029, 707, 693; **<sup>1</sup>H NMR** (400 MHz, CDCl<sub>3</sub>)  $\delta$  7.43 – 7.18 (m, 15H), 5.22 (d,  $J$  = 14.8 Hz, 1H), 5.09 (d,  $J$  = 13.6 Hz, 1H), 4.93 (d,  $J$  = 13.6 Hz, 1H), 3.64 (d,  $J$  = 14.8 Hz, 1H), 3.04 – 2.93 (m, 1H), 2.40 (ddd,  $J$  = 14.8, 9.2, 6.0 Hz, 1H), 1.84 – 1.76 (m, 2H), 1.60 (s, 3H); **<sup>13</sup>C NMR** (101 MHz, CDCl<sub>3</sub>)  $\delta$  205.1, 169.1, 155.8, 155.1, 138.0, 136.6, 135.1, 129.7, 129.6, 129.2, 129.2, 128.9, 128.7, 128.3,

128.2, 126.3, 72.8, 48.9, 44.7, 37.1, 30.1, 29.4; *m/z* (ESI HRMS) C<sub>28</sub>H<sub>26</sub>N<sub>2</sub>O<sub>4</sub>Na requires 477.1790, found [MNa]<sup>+</sup> 477.1792; [ $\alpha$ ]<sub>D</sub><sup>20</sup> = -23.4 (c 1.0, CHCl<sub>3</sub>).

1,4-dibenzyl-6-(4-methoxyphenyl)-6-(3-oxobutyl)piperazine-2,3,5-trione **2b**

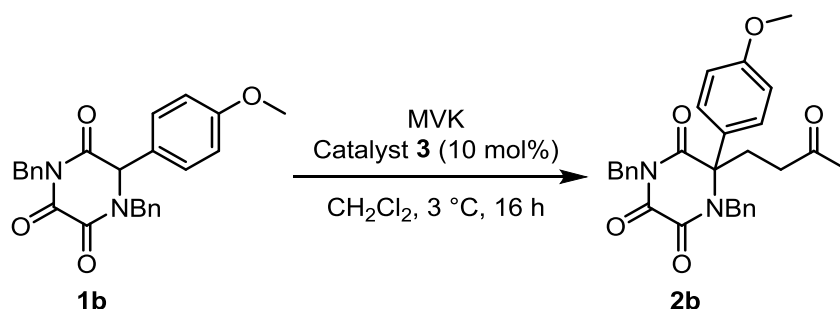

Following general procedure **Cii** using triketopiperazine **1b** (41 mg, 0.10 mmol), chiral catalyst **3** (4 mg, 10  $\mu$ mol, 10 mol%), CH<sub>2</sub>Cl<sub>2</sub> (1 mL) and methyl vinyl ketone (20  $\mu$ L, 0.25 mmol). The reaction mixture was purified by flash column chromatography on silica gel (gradient: hexane:EtOAc = (4:1) to (2:1)) to afford **2b** (40.0 mg, 83%) as a colourless oil in 7:93 er as determined by HPLC analysis [Phenomenex Lux Amylose-2, MeCN:water, 50:50, 1.0 ml/min,  $\lambda$  230 nm, t(minor) = 13.9 min, t(major) = 16.9 min].

**IR**  $\nu_{\text{max}}$ /cm<sup>-1</sup> 3036, 2959, 1739, 1683, 1512, 1420, 1358, 1260, 1229, 1184, 1077, 1031, 824, 698; **<sup>1</sup>H NMR** (400 MHz, CDCl<sub>3</sub>)  $\delta$  7.33 – 7.21 (m, 12H), 6.95 – 6.89 (m, 2H), 5.22 (d, *J* = 14.7 Hz, 1H), 5.11 (d, *J* = 13.6 Hz, 1H), 4.95 (d, *J* = 13.6 Hz, 1H), 3.84 (s, 3H), 3.70 (d, *J* = 14.8 Hz, 1H), 3.02 – 2.91 (m, 1H), 2.38 (ddd, *J* = 14.8, 9.2, 6.1 Hz, 1H), 1.84 – 1.76 (m, 2H), 1.62 (s, 3H); **<sup>13</sup>C NMR** (101 MHz, CDCl<sub>3</sub>)  $\delta$  205.2, 169.4, 160.4, 155.9, 155.1, 136.8, 135.2, 129.8, 129.3, 129.2, 128.9, 128.7, 128.3, 128.2, 127.6, 115.0, 72.4, 55.6, 48.8, 44.7, 37.2, 30.2, 29.4; *m/z* (ES HRMS) C<sub>29</sub>H<sub>28</sub>N<sub>2</sub>O<sub>5</sub>Na requires 507.1896, found [MNa]<sup>+</sup> 507.1898; [ $\alpha$ ]<sub>D</sub><sup>20</sup> = -18.5 (c 1.0, CHCl<sub>3</sub>).

1,4-dibenzyl-6-(4-nitrophenyl)-6-(3-oxobutyl)piperazine-2,3,5-trione **2c**

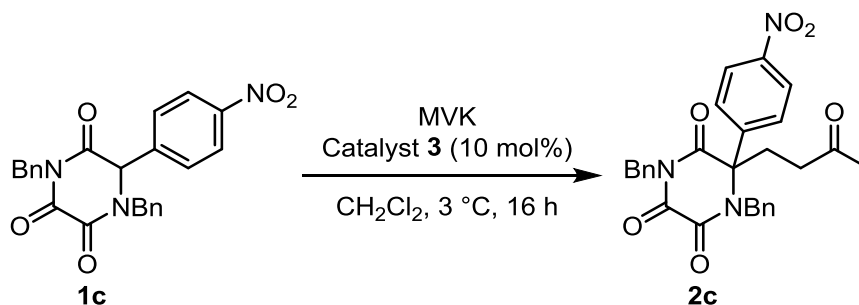

Following general procedure **Cii** using triketopiperazine **1c** (43 mg, 0.10 mmol), chiral catalyst **3** (4 mg, 10  $\mu$ mol, 10 mol%), CH<sub>2</sub>Cl<sub>2</sub> (1 mL) and methyl vinyl ketone (20  $\mu$ L, 0.25 mmol). The reaction mixture was purified by flash column chromatography on silica gel (gradient: hexane:EtOAc = (4:1) to (2:1)) to afford **2c** (34.6 mg, 70%) as a colourless oil in 5:95 er as determined by HPLC analysis [Phenomenex Lux Amylose-2, MeCN:water, 45:55, 1.0 ml/min,  $\lambda$  220 nm, t(minor) = 23.2 min, t(major) = 27.1 min].

**IR**  $\nu_{\max}$ /cm<sup>-1</sup> 3080, 3003, 2939, 1751, 1680, 1517, 1417, 1345, 1229, 1109, 1079, 1030, 854, 730, 703; **<sup>1</sup>H NMR** (400 MHz, CDCl<sub>3</sub>)  $\delta$  8.29 – 8.23 (m, 2H), 7.63 – 7.57 (m, 2H), 7.40 – 7.22 (m, 10H), 5.20 – 5.11 (m, 2H), 5.02 (d,  $J$  = 13.6 Hz, 1H), 3.86 (d,  $J$  = 14.8 Hz, 1H), 3.03 (ddd,  $J$  = 14.4, 10.7, 5.8 Hz, 1H), 2.56 (ddd,  $J$  = 14.7, 10.8, 4.3 Hz, 1H), 1.99 – 1.82 (m, 2H), 1.73 (s, 3H); **<sup>13</sup>C NMR** (101 MHz, CDCl<sub>3</sub>)  $\delta$  204.7, 168.2, 155.4, 154.7, 148.4, 144.6, 136.1, 134.8, 129.4, 129.1, 129.0, 128.8, 128.6, 128.4, 127.9, 124.5, 72.3, 49.0, 45.0, 36.9, 30.5, 29.5; ***m/z*** (ES HRMS) C<sub>28</sub>H<sub>25</sub>N<sub>3</sub>O<sub>6</sub>Na requires 522.1641, found [MNa]<sup>+</sup> 522.1638;  $[\alpha]_D^{20}$  = -7.5 (c 1.0, CHCl<sub>3</sub>).

1,4-dibenzyl-6-(4-bromophenyl)-6-(3-oxobutyl)piperazine-2,3,5-trione **2d**

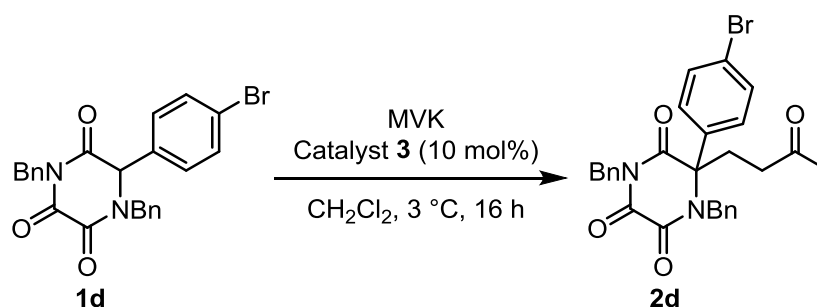

Following general procedure **Cii** using triketopiperazine **1d** (46 mg, 0.10 mmol), chiral catalyst **3** (4 mg, 10  $\mu$ mol, 10 mol%), CH<sub>2</sub>Cl<sub>2</sub> (1 mL) and methyl vinyl ketone (20  $\mu$ L, 0.25 mmol). The reaction mixture was purified by flash column chromatography on silica gel (gradient: hexane:EtOAc = (4:1) to (2:1)) to afford **2d** (46.7 mg, 88%) as a colourless oil in 9:91 er as determined by HPLC analysis [Phenomenex Lux Amylose-2, MeCN:water, 50:50, 1.0 ml/min,  $\lambda$  230 nm, t(minor) = 21.6 min, t(major) = 24.3 min].

**IR**  $\nu_{\max}$ /cm<sup>-1</sup> 3063, 3032, 1743, 1716, 1680, 1491, 1360, 1228, 1077, 908, 727, 701; **<sup>1</sup>H NMR** (400 MHz, CDCl<sub>3</sub>)  $\delta$  7.53 – 7.49 (m, 2H), 7.30 – 7.16 (m, 12H), 5.16 (d,  $J$  = 14.7 Hz, 1H), 5.08 (d,  $J$  = 13.6 Hz, 1H), 4.93 (d,  $J$  = 13.5 Hz, 1H), 3.69 (d,  $J$  = 14.8 Hz, 1H), 2.91 (ddd,  $J$  = 14.4, 10.0, 6.8 Hz, 1H), 2.38 (ddd,  $J$  = 14.8, 9.8, 5.4 Hz, 1H), 1.86 – 1.70 (m, 2H), 1.61 (s, 3H); **<sup>13</sup>C NMR** (101 MHz, CDCl<sub>3</sub>)  $\delta$  204.9, 168.8, 155.6, 155.0, 137.1, 136.4, 135.0, 132.8, 129.3, 129.2, 128.9, 128.8, 128.5, 128.3, 128.1, 124.1, 72.4, 48.9, 44.9, 37.0, 30.2, 29.4; ***m/z*** (ES HRMS) C<sub>28</sub>H<sub>25</sub>N<sub>2</sub>O<sub>4</sub>NaBr requires 555.0895, found [MNa]<sup>+</sup> 555.0900;  $[\alpha]_D^{20}$  = -4.7 (c 1.0, CHCl<sub>3</sub>).



1,4-dibenzyl-6-(furan-2-yl)-6-(3-oxobutyl)piperazine-2,3,5-trione **2e**

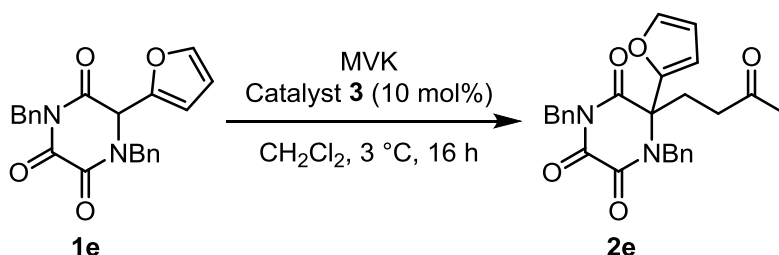

Following general procedure **Cii** using triketopiperazine **1e** (37 mg, 0.10 mmol), chiral catalyst **3** (4 mg, 10  $\mu\text{mol}$ , 10 mol%),  $\text{CH}_2\text{Cl}_2$  (1 mL) and methyl vinyl ketone (20  $\mu\text{L}$ , 0.25 mmol). The reaction mixture was purified by flash column chromatography on silica gel (gradient: hexane:EtOAc = (4:1) to (2:1)) to afford **2e** (44 mg, 99%) as a colourless oil in 94:6 er as determined by HPLC analysis [Phenomenex Lux Cellulose-3, MeCN:water, 35:65, 1.0 ml/min,  $\lambda$  220 nm,  $t(\text{major})$  = 24.4 min,  $t(\text{minor})$  = 27.8 min].

**IR**  $\nu_{\text{max}}/\text{cm}^{-1}$  3036, 2935, 1746, 1684, 1495, 1415, 1365, 1342, 1231, 1147, 1015, 908, 731, 700;  **$^1\text{H}$  NMR** (400 MHz,  $\text{CDCl}_3$ )  $\delta$  7.37 – 7.17 (m, 11H), 6.57 (dd,  $J$  = 3.4, 0.8 Hz, 1H), 6.36 (dd,  $J$  = 3.4, 1.9 Hz, 1H), 5.12 (d,  $J$  = 13.7 Hz, 1H), 5.05 – 4.97 (m, 2H), 3.92 (d,  $J$  = 14.9 Hz, 1H), 2.74 (ddd,  $J$  = 14.7, 10.4, 6.5 Hz, 1H), 2.44 (ddd,  $J$  = 14.9, 10.0, 5.1 Hz, 1H), 1.89 – 1.81 (m, 2H), 1.67 (s, 3H);  **$^{13}\text{C}$  NMR** (101 MHz,  $\text{CDCl}_3$ )  $\delta$  205.0, 167.1, 155.8, 154.9, 149.8, 143.7, 136.3, 135.1, 129.2, 128.8, 128.8, 128.7, 128.3, 128.0, 111.1, 110.7, 68.5, 47.7, 44.9, 36.6, 29.5, 28.6;  **$m/z$**  (ES HRMS)  $\text{C}_{26}\text{H}_{24}\text{N}_2\text{O}_5\text{Na}$  requires 467.1583, found  $[\text{MNa}]^+$  467.1590;  $[\alpha]_{\text{D}}^{20}$  =  $-12.1$  (c 1.0,  $\text{CHCl}_3$ ).

1,4-dibenzyl-6-(3-oxobutyl)-6-(thiophen-2-yl)piperazine-2,3,5-trione **2f**

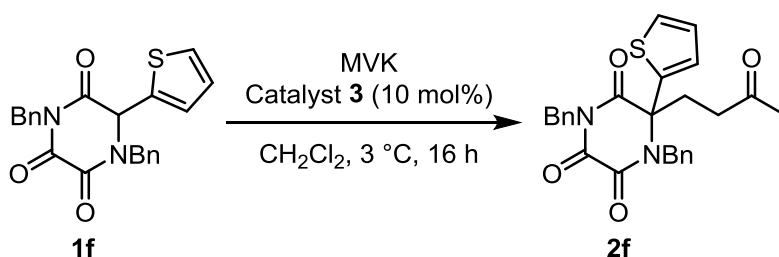

Following general procedure **Cii** using triketopiperazine **1f** (39 mg, 0.10 mmol), chiral catalyst **3** (4 mg, 10  $\mu\text{mol}$ , 10 mol%),  $\text{CH}_2\text{Cl}_2$  (1 mL) and methyl vinyl ketone (20  $\mu\text{L}$ , 0.25 mmol). The reaction mixture was purified by flash column chromatography on silica gel (gradient: hexane:EtOAc = (4:1) to (2:1)) to afford **2f** (42.7 mg, 93%) as a colourless oil in 6:94 er as determined by HPLC analysis [Phenomenex Lux Cellulose-1, MeCN:water, 50:50, 1.0 ml/min,  $\lambda$  230 nm,  $t(\text{minor})$  = 21.4 min,  $t(\text{major})$  = 23.4 min].

**IR**  $\nu_{\max}/\text{cm}^{-1}$  2924, 1742, 1687, 1495, 1416, 1363, 1227, 1079, 1028, 701;  **$^1\text{H NMR}$**  (400 MHz,  $\text{CDCl}_3$ )  $\delta$  7.37 (dd,  $J = 5.1, 1.2$  Hz, 1H), 7.34 – 7.21 (m, 10H), 7.06 (dd,  $J = 3.7, 1.3$  Hz, 1H), 7.01 (dd,  $J = 5.1, 3.7$  Hz, 1H), 5.37 (d,  $J = 14.8$  Hz, 1H), 5.08 (d,  $J = 13.7$  Hz, 1H), 4.95 (d,  $J = 13.7$  Hz, 1H), 3.84 (d,  $J = 14.9$  Hz, 1H), 2.96 (ddd,  $J = 14.6, 11.6, 5.3$  Hz, 1H), 2.48 (ddd,  $J = 14.8, 11.5, 3.5$  Hz, 1H), 1.83 (ddd,  $J = 17.1, 11.5, 5.3$  Hz, 1H), 1.72 (ddd,  $J = 17.8, 11.6, 3.5$  Hz, 1H), 1.58 (s, 3H);  **$^{13}\text{C NMR}$**  (101 MHz,  $\text{CDCl}_3$ )  $\delta$  204.9, 167.9, 155.4, 154.8, 142.8, 136.7, 135.0, 129.1, 129.1, 129.0, 128.7, 128.3, 128.3, 127.8, 127.6, 126.9, 70.8, 48.8, 44.9, 37.3, 31.6, 29.3;  **$m/z$**  (ES HRMS)  $\text{C}_{26}\text{H}_{24}\text{N}_2\text{O}_4\text{NaS}$  requires 483.1354, found  $[\text{MNa}]^+$  483.1353;  $[\alpha]_D^{20} = -33.5$  (c 1.0,  $\text{CHCl}_3$ ).

1,4-dibenzyl-6-(2-bromophenyl)-6-(3-oxobutyl)piperazine-2,3,5-trione **2g**

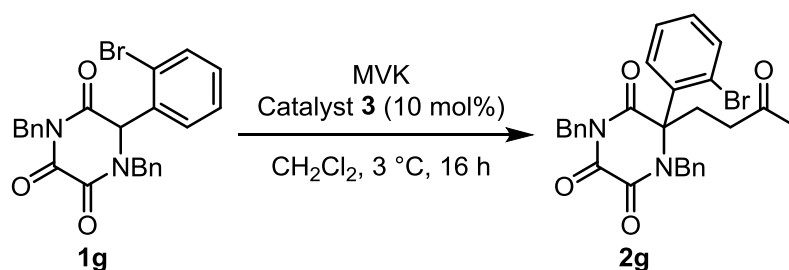

Following general procedure **Cii** using triketopiperazine **1g** (46 mg, 0.10 mmol), chiral catalyst **3** (4 mg, 10  $\mu\text{mol}$ , 10 mol%),  $\text{CH}_2\text{Cl}_2$  (1 mL) and methyl vinyl ketone (20  $\mu\text{L}$ , 0.25 mmol). The reaction mixture was purified by flash column chromatography on silica gel (gradient: hexane:EtOAc = (4:1) to (2:1)) to afford **2g** (47.1 mg, 88%) as a colourless oil in 45:55 er as determined by HPLC analysis [Phenomenex Lux Amylose-2, MeCN:water, 50:50, 1.0 ml/min,  $\lambda$  230 nm,  $t(\text{minor}) = 19.4$  min,  $t(\text{major}) = 23.5$  min].

**IR**  $\nu_{\max}/\text{cm}^{-1}$  3064, 3033, 1741, 1717, 1680, 1494, 1419, 1361, 1262, 1227, 1075, 1027, 908, 727, 700;  **$^1\text{H NMR}$**  (400 MHz,  $\text{CDCl}_3$ )  $\delta$  7.70 (dd,  $J = 8.0, 1.6$  Hz, 1H), 7.53 – 7.40 (m, 4H), 7.32 – 7.23 (m, 4H), 7.18 – 7.07 (m, 3H), 7.04 – 6.98 (m, 2H), 5.18 (d,  $J = 13.3$  Hz, 1H), 5.03 (d,  $J = 13.3$  Hz, 1H), 4.69 (d,  $J = 14.7$  Hz, 1H), 3.96 (d,  $J = 14.7$  Hz, 1H), 2.55 (ddd,  $J = 14.0, 11.4, 4.2$  Hz, 1H), 2.44 (ddd,  $J = 14.1, 11.0, 5.2$  Hz, 1H), 1.90 (ddd,  $J = 17.6, 11.0, 4.2$  Hz, 1H), 1.73 – 1.60 (m, 4H);  **$^{13}\text{C NMR}$**  (101 MHz,  $\text{CDCl}_3$ )  $\delta$  204.6, 169.3, 156.5, 155.0, 136.2, 135.9, 135.3, 134.9, 131.2, 130.4, 129.8, 129.0, 128.7, 128.6, 128.5, 128.1, 128.0, 124.5, 71.7, 47.7, 44.6, 36.4, 33.0, 29.7;  **$m/z$**  (ES HRMS)  $\text{C}_{28}\text{H}_{25}\text{N}_2\text{O}_4\text{BrNa}$  requires 555.0895, found  $[\text{MNa}]^+$  555.0898;  $[\alpha]_D^{20} = 1.9$  (c 1.0,  $\text{CHCl}_3$ ).

1,4-dibenzyl-6-(1-methyl-1H-pyrrol-2-yl)-6-(3-oxobutyl)piperazine-2,3,5-trione **2h**

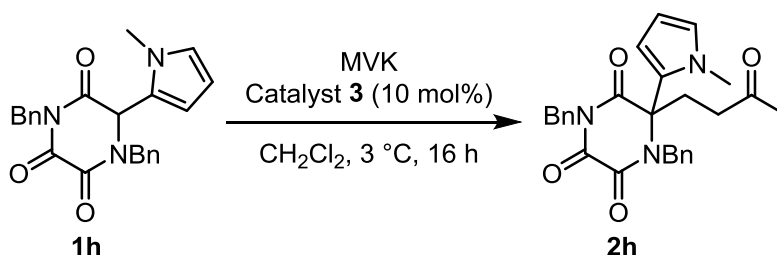

Following general procedure **Cii** using triketopiperazine **1h** (39 mg, 0.10 mmol), chiral catalyst **3** (4 mg, 10  $\mu$ mol, 10 mol%),  $\text{CH}_2\text{Cl}_2$  (1 mL) and methyl vinyl ketone (20  $\mu$ L, 0.25 mmol). The reaction mixture was purified by flash column chromatography on silica gel (gradient: hexane:EtOAc = (4:1) to (2:1)) to afford **2h** (45.0 mg, 99%) as a colourless oil in 49:51 er as determined by HPLC analysis [Phenomenex Lux Cellulose-3, MeCN:water, 40:60, 1.0 ml/min,  $\lambda$  220 nm,  $t(\text{minor})$  = 15.9 min,  $t(\text{major})$  = 18.3 min].

**IR**  $\nu_{\text{max}}/\text{cm}^{-1}$  3063, 3033, 2947, 1742, 1717, 1681, 1491, 1416, 1358, 1306, 1261, 1222, 1074, 908, 724, 699;  **$^1\text{H}$  NMR** (400 MHz,  $\text{CDCl}_3$ )  $\delta$  7.48 – 7.41 (m, 2H), 7.30 – 7.23 (m, 3H), 7.19 – 7.09 (m, 3H), 6.91 – 6.86 (m, 2H), 6.46 (dd,  $J$  = 3.8, 1.8 Hz, 1H), 6.39 (dd,  $J$  = 2.8, 1.8 Hz, 1H), 6.14 (dd,  $J$  = 3.8, 2.8 Hz, 1H), 5.10 (d,  $J$  = 13.3 Hz, 1H), 5.05 (d,  $J$  = 13.3 Hz, 1H), 4.55 (d,  $J$  = 13.9 Hz, 1H), 4.32 (d,  $J$  = 13.9 Hz, 1H), 2.70 – 2.60 (m, 4H), 2.52 (ddd,  $J$  = 14.5, 9.9, 5.6 Hz, 1H), 2.15 – 1.93 (m, 2H), 1.86 (s, 3H);  **$^{13}\text{C}$  NMR** (101 MHz,  $\text{CDCl}_3$ )  $\delta$  204.9, 168.8, 156.1, 154.2, 135.8, 135.0, 130.1, 129.7, 128.7, 128.6, 128.3, 128.0, 126.9, 125.4, 112.2, 107.4, 67.6, 47.5, 44.9, 37.0, 34.0, 33.2, 29.9;  **$m/z$**  (ES HRMS)  $\text{C}_{27}\text{H}_{27}\text{N}_3\text{O}_4\text{Na}$  requires 480.1899, found  $[\text{MNa}]^+$  480.1904;  $[\alpha]_D^{20}$  = 5.7 ( $c$  1.0,  $\text{CHCl}_3$ ).

1,4-dibenzyl-6-(1-methyl-1H-pyrrol-3-yl)-6-(3-oxobutyl)piperazine-2,3,5-trione **2i**

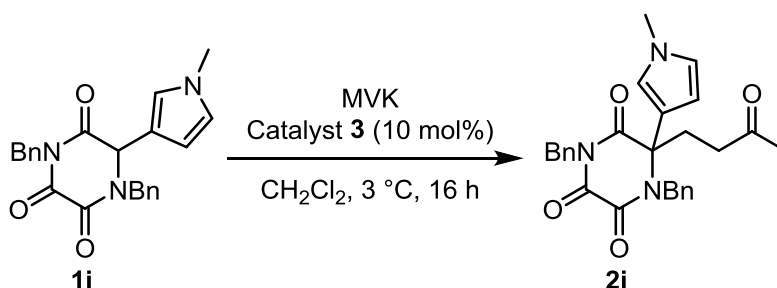

Following general procedure **Cii** using triketopiperazine **1i** (34 mg, 90  $\mu$ mol), chiral catalyst **3** (3.5 mg, 9  $\mu$ mol 10 mol%),  $\text{CH}_2\text{Cl}_2$  (1 mL) and methyl vinyl ketone (18  $\mu$ L, 0.21 mmol). The reaction mixture was purified by flash column chromatography on silica gel (gradient: hexane:EtOAc = (4:1) to (2:1)) to afford **2i** (25.1 mg, 63%) as a colourless oil in 77:23 er as determined by HPLC analysis [Phenomenex Lux Cellulose-3, MeCN:water, 35:65, 1.0 ml/min,  $\lambda$  220 nm,  $t(\text{major})$  = 19.5 min,  $t(\text{minor})$  = 21.1 min].

**IR**  $\nu_{\text{max}}/\text{cm}^{-1}$  3062, 3031, 1741, 1714, 1682, 1495, 1419, 1362, 1227, 1166, 1080, 911, 729, 701;  **$^1\text{H NMR}$**  (400 MHz,  $\text{CDCl}_3$ )  $\delta$  7.35 – 7.20 (m, 10H), 6.59 (t,  $J = 2.1$  Hz, 1H), 6.55 (t,  $J = 2.5$  Hz, 1H), 5.90 (dd,  $J = 2.9, 1.9$  Hz, 1H), 5.29 (d,  $J = 14.9$  Hz, 1H), 5.08 (d,  $J = 13.7$  Hz, 1H), 4.95 (d,  $J = 13.7$  Hz, 1H), 3.91 (d,  $J = 14.8$  Hz, 1H), 3.61 (s, 3H), 2.81 (ddd,  $J = 14.8, 11.8, 5.3$  Hz, 1H), 2.30 (ddd,  $J = 14.9, 11.6, 3.4$  Hz, 1H), 1.82 (ddd,  $J = 17.1, 11.7, 5.3$  Hz, 1H), 1.70 (ddd,  $J = 17.9, 11.8, 3.4$  Hz, 1H), 1.57 (s, 3H);  **$^{13}\text{C NMR}$**  (101 MHz,  $\text{CDCl}_3$ )  $\delta$  205.7, 169.7, 156.1, 155.3, 137.4, 135.4, 129.2, 129.1, 128.8, 128.6, 128.1, 128.0, 123.3, 122.9, 120.4, 106.5, 69.5, 48.3, 44.7, 37.4, 36.7, 30.4, 29.4;  **$m/z$**  (ES HRMS)  $\text{C}_{27}\text{H}_{28}\text{N}_3\text{O}_4$  requires 458.2080, found  $[\text{MH}]^+$  458.2082;  $[\alpha]_D^{20} = -21.2$  (c 1.0,  $\text{CHCl}_3$ ).

1,4-dibenzyl-6-(1H-indol-3-yl)-6-(3-oxobutyl)piperazine-2,3,5-trione **2j**

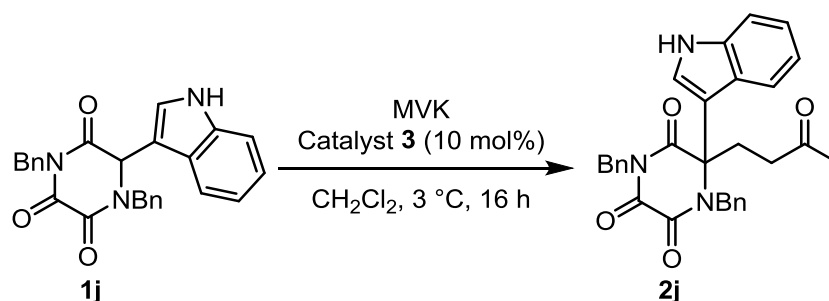

Following general procedure **Cii** using triketopiperazine **1j** (12 mg, 30  $\mu\text{mol}$ ), chiral catalyst **3** (1 mg, 3  $\mu\text{mol}$ , 10 mol%),  $\text{CH}_2\text{Cl}_2$  (1 mL) and methyl vinyl ketone (6  $\mu\text{L}$ , 80  $\mu\text{mol}$ ). The reaction mixture was purified by flash column chromatography on silica gel (gradient: hexane:EtOAc = (4:1) to (2:1)) to afford **2j** (12.5 mg, 91%) as a colourless oil in 27:73 er as determined by HPLC analysis [Phenomenex Lux Cellulose-1, MeCN:water, 60:40, 1.0 ml/min,  $\lambda$  220 nm,  $t(\text{minor}) = 5.8$  min,  $t(\text{major}) = 9.9$  min].

**IR**  $\nu_{\text{max}}/\text{cm}^{-1}$  3343, 1739, 1715, 1676, 1496, 1416, 1362, 1225, 1166, 1017, 980, 909, 728, 699;  **$^1\text{H NMR}$**  (400 MHz,  $\text{CDCl}_3$ )  $\delta$  8.84 – 8.76 (m, 1H), 7.43 – 7.34 (m, 4H), 7.25 – 7.13 (m, 9H), 7.07 (d,  $J = 7.9$  Hz, 1H), 7.01 – 6.96 (m, 1H), 5.23 – 5.14 (m, 2H), 5.00 (d,  $J = 13.5$  Hz, 1H), 3.94 (d,  $J = 14.7$  Hz, 1H), 2.83 (ddd,  $J = 14.4, 11.5, 5.1$  Hz, 1H), 2.50 – 2.41 (m, 1H), 1.90 (ddd,  $J = 17.6, 11.5, 3.7$  Hz, 1H), 1.77 (ddd,  $J = 17.3, 11.7, 5.2$  Hz, 1H), 1.66 (s, 3H);  **$^{13}\text{C NMR}$**  (101 MHz,  $\text{CDCl}_3$ )  $\delta$  205.3, 169.6, 156.4, 154.8, 136.9, 136.8, 135.2, 129.6, 129.1, 128.7, 128.4, 128.0, 124.8, 124.1, 123.3, 121.2, 118.4, 114.1, 112.2, 69.4, 48.0, 44.9, 36.7, 31.9, 29.6;  **$m/z$**  (ES HRMS)  $\text{C}_{30}\text{H}_{27}\text{N}_3\text{O}_4\text{Na}$  requires 516.1899, found  $[\text{MNa}]^+$  516.1901;  $[\alpha]_D^{20} = -14.5$  (c 1.0,  $\text{CHCl}_3$ ).

1,4-dibenzyl-6-(3-oxopentyl)-6-phenylpiperazine-2,3,5-trione **2k**

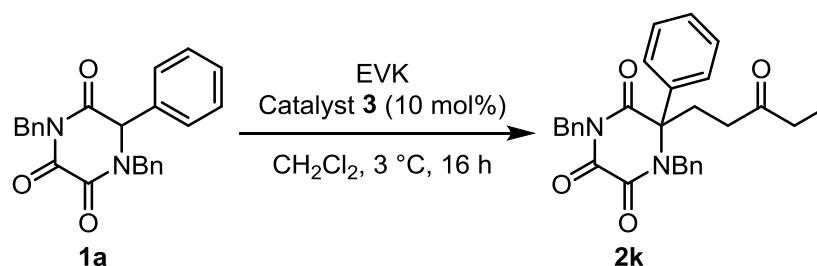

Following general procedure **Cii** using triketopiperazine **1a** (38 mg, 0.10 mmol), chiral catalyst **3** (4 mg, 10  $\mu\text{mol}$ , 10 mol%),  $\text{CH}_2\text{Cl}_2$  (1 mL) and ethyl vinyl ketone (25  $\mu\text{L}$ , 0.25 mmol). The reaction mixture was purified by flash column chromatography on silica gel (gradient: hexane:EtOAc = (4:1) to (2:1)) to afford **2k** (41.3 mg, 91%) as a colourless oil in 4:96 er as determined by HPLC analysis [Phenomenex Lux Cellulose-1, MeCN:water, 50:50, 1.0 ml/min,  $\lambda$  230 nm,  $t(\text{minor}) = 28.1$  min,  $t(\text{major}) = 30.6$  min].

**IR**  $\nu_{\text{max}}/\text{cm}^{-1}$  2938, 1743, 1680, 1495, 1416, 1362, 1261, 1222, 1144, 1077, 1030, 782, 697;  **$^1\text{H}$  NMR** (400 MHz,  $\text{CDCl}_3$ )  $\delta$  7.44 – 7.17 (m, 15H), 5.21 (d,  $J = 14.8$  Hz, 1H), 5.09 (d,  $J = 13.6$  Hz, 1H), 4.93 (d,  $J = 13.6$  Hz, 1H), 3.64 (d,  $J = 14.8$  Hz, 1H), 3.06 – 2.94 (m, 1H), 2.48 – 2.37 (m, 1H), 1.93 – 1.81 (m, 1H), 1.81 – 1.65 (m, 3H), 0.76 (t,  $J = 7.3$  Hz, 3H);  **$^{13}\text{C}$  NMR** (101 MHz,  $\text{CDCl}_3$ )  $\delta$  207.9, 169.2, 155.9, 155.2, 138.0, 136.7, 135.1, 129.7, 129.6, 129.2, 128.8, 128.7, 128.3, 128.1, 126.3, 72.8, 48.9, 44.7, 35.8, 35.4, 30.1, 7.7;  **$m/z$**  (ES HRMS)  $\text{C}_{29}\text{H}_{28}\text{N}_2\text{O}_4\text{Na}$  requires 491.1947, found  $[\text{MNa}]^+$  491.1949;  $[\alpha]_D^{20} = -23.9$  ( $c$  1.0,  $\text{CHCl}_3$ ).

1,4-dibenzyl-6-(4-methoxyphenyl)-6-(3-oxopentyl)piperazine-2,3,5-trione **2l**

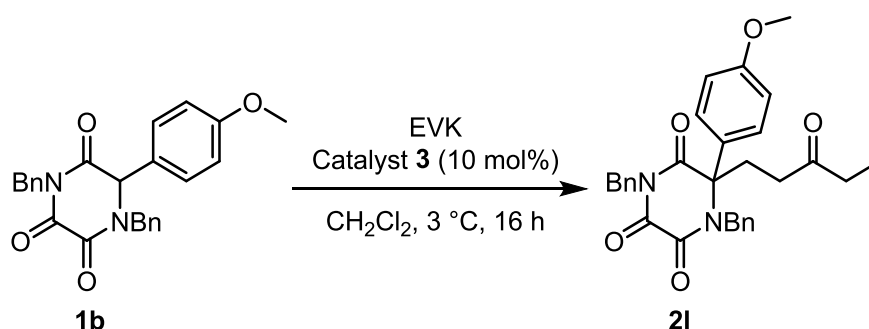

Following general procedure **Cii** using triketopiperazine **1b** (41 mg, 0.10 mmol), chiral catalyst **3** (4 mg, 10  $\mu\text{mol}$ , 10 mol%),  $\text{CH}_2\text{Cl}_2$  (1 mL) and ethyl vinyl ketone (25  $\mu\text{L}$ , 0.25 mmol). The reaction mixture was purified by flash column chromatography on silica gel (gradient: hexane:EtOAc = (4:1) to (2:1)) to afford **2l** (37 mg, 75%) as a colourless oil in 3:97 er as determined by HPLC analysis [Phenomenex Lux Amylose-2, MeCN:water, 50:50, 1.0 ml/min,  $\lambda$  220 nm,  $t(\text{minor}) = 22.1$  min,  $t(\text{major}) = 27.4$  min].

IR  $\nu_{\text{max}}/\text{cm}^{-1}$  2970, 2936, 1742, 1681, 1605, 1511, 1416, 1362, 1256, 1222, 1183, 1078, 1031, 910, 832, 728, 700;  $^1\text{H NMR}$  (400 MHz,  $\text{CDCl}_3$ )  $\delta$  7.32 – 7.18 (m, 12H), 6.94 – 6.89 (m, 2H), 5.21 (d,  $J = 14.8$  Hz, 1H), 5.11 (d,  $J = 13.6$  Hz, 1H), 4.94 (d,  $J = 13.6$  Hz, 1H), 3.84 (s, 3H), 3.69 (d,  $J = 14.7$  Hz, 1H), 2.97 (ddd,  $J = 14.4, 9.2, 7.6$  Hz, 1H), 2.46 – 2.33 (m, 1H), 1.88 (dq,  $J = 17.6, 7.4$  Hz, 1H), 1.80 – 1.66 (m, 3H), 0.78 (t,  $J = 7.3$  Hz, 3H);  $^{13}\text{C NMR}$  (101 MHz,  $\text{CDCl}_3$ )  $\delta$  208.0, 169.4, 160.4, 156.0, 155.2, 136.8, 135.2, 129.8, 129.3, 129.3, 128.8, 128.7, 128.3, 128.1, 127.7, 115.0, 72.5, 55.6, 48.8, 44.7, 35.9, 35.5, 30.2, 7.7;  $m/z$  (ES HRMS)  $\text{C}_{30}\text{H}_{30}\text{N}_2\text{O}_5\text{Na}$  requires 521.2052, found  $[\text{MNa}]^+$  521.2048;  $[\alpha]_D^{20} = -4.8$  (c 1.0,  $\text{CHCl}_3$ ).

1,4-dibenzyl-6-(4-nitrophenyl)-6-(3-oxopentyl)piperazine-2,3,5-trione **2m**

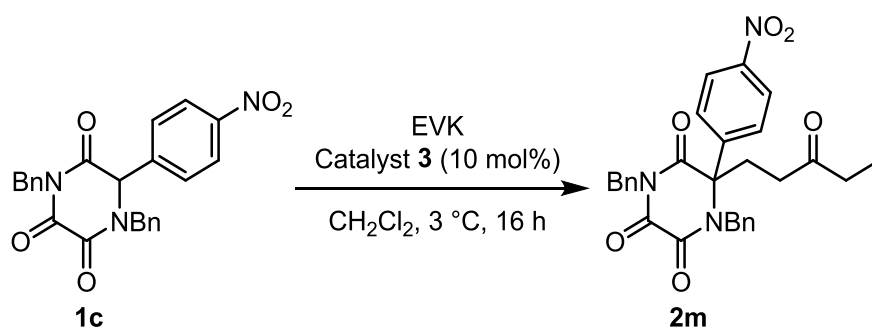

Following general procedure **Cii** using triketopiperazine **1c** (43 mg, 0.10 mmol), chiral catalyst **3** (4 mg, 10  $\mu\text{mol}$ , 10 mol%),  $\text{CH}_2\text{Cl}_2$  (1 mL) and ethyl vinyl ketone (25  $\mu\text{L}$ , 0.25 mmol). The reaction mixture was purified by flash column chromatography on silica gel (gradient: hexane:EtOAc = (4:1) to (2:1)) to afford **2m** (31.5 mg, 63%) as a colourless oil in 3:97 er as determined by HPLC analysis [Phenomenex Lux Amylose-2, MeCN:water, 50:50, 1.0 ml/min,  $\lambda$  230 nm,  $t(\text{minor}) = 19.3$  min,  $t(\text{major}) = 22.7$  min].

IR  $\nu_{\text{max}}/\text{cm}^{-1}$  2980, 2933, 1744, 1682, 1608, 1525, 1495, 1415, 1349, 1221, 1113, 1078, 1030, 852, 729, 700;  $^1\text{H NMR}$  (400 MHz,  $\text{CDCl}_3$ )  $\delta$  8.22 – 8.16 (m, 2H), 7.56 – 7.49 (m, 2H), 7.32 – 7.14 (m, 10H), 5.13 – 5.04 (m, 2H), 4.94 (d,  $J = 13.5$  Hz, 1H), 3.79 (d,  $J = 14.8$  Hz, 1H), 2.98 (ddd,  $J = 14.4, 10.2, 6.4$  Hz, 1H), 2.51 (ddd,  $J = 14.7, 10.2, 5.1$  Hz, 1H), 1.91 (dq,  $J = 17.6, 7.4$  Hz, 1H), 1.84 – 1.72 (m, 3H), 0.79 (t,  $J = 7.3$  Hz, 3H);  $^{13}\text{C NMR}$  (101 MHz,  $\text{CDCl}_3$ )  $\delta$  207.5, 168.3, 155.4, 154.7, 148.4, 144.7, 136.1, 134.8, 129.4, 129.1, 128.9, 128.8, 128.6, 128.3, 127.9, 124.5, 72.4, 49.0, 45.0, 35.5, 30.6, 7.7;  $m/z$  (ES HRMS)  $\text{C}_{29}\text{H}_{27}\text{N}_3\text{O}_6\text{Na}$  requires 536.1798, found  $[\text{MNa}]^+$  536.1800;  $[\alpha]_D^{20} = -7.2$  (c 1.0,  $\text{CHCl}_3$ ).

1,4-dibenzyl-6-(3-oxo-3-phenylpropyl)-6-phenylpiperazine-2,3,5-trione **2n**

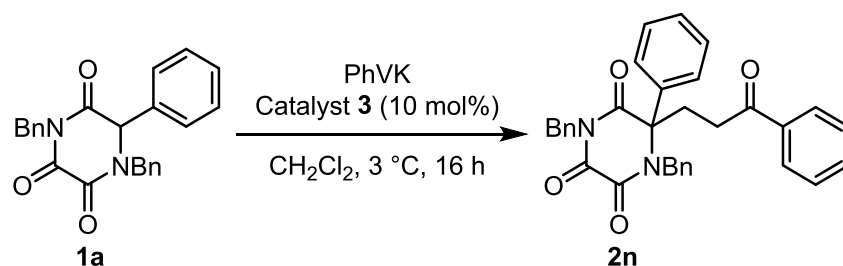

Following general procedure **Cii** using triketopiperazine **1a** (38 mg, 0.10 mmol), chiral catalyst **3** (4 mg, 10 μmol, 10 mol%), CH<sub>2</sub>Cl<sub>2</sub> (1 mL) and phenyl vinyl ketone (33 mg, 0.25 mmol). The reaction mixture was purified by flash column chromatography on silica gel (gradient: hexane:EtOAc = (4:1) to (2:1)) to afford **2n** (46 mg, 90%) as a colourless oil in 85:15 er as determined by HPLC analysis [Phenomenex Lux Cellulose-1, MeCN:water, 50:50, 1.0 ml/min, λ 230 nm, t(major) = 61.3 min, t(minor) = 70.3 min].

**IR**  $\nu_{\text{max}}/\text{cm}^{-1}$  3064, 3029, 1742, 1678, 1597, 1494, 1415, 1361, 1262, 1228, 1138, 1073, 1002, 746, 690; **<sup>1</sup>H NMR** (400 MHz, CDCl<sub>3</sub>) δ 7.53 – 7.29 (m, 12H), 7.25 – 7.17 (m, 5H), 7.06 – 6.99 (m, 2H), 6.96 – 6.89 (m, 1H), 5.23 (d, *J* = 14.8 Hz, 1H), 5.13 (d, *J* = 13.5 Hz, 1H), 4.98 (d, *J* = 13.6 Hz, 1H), 3.73 (d, *J* = 14.8 Hz, 1H), 3.18 (ddd, *J* = 14.4, 9.9, 6.6 Hz, 1H), 2.63 (ddd, *J* = 14.7, 9.4, 5.6 Hz, 1H), 2.41 – 2.25 (m, 2H); **<sup>13</sup>C NMR** (101 MHz, CDCl<sub>3</sub>) δ 196.8, 169.3, 155.9, 155.2, 138.1, 136.4, 136.1, 135.2, 133.2, 129.7, 129.6, 129.3, 128.9, 128.8, 128.4, 128.3, 128.0, 127.7, 126.4, 72.9, 49.0, 44.7, 32.5, 30.6; ***m/z*** (ES HRMS) C<sub>23</sub>H<sub>28</sub>N<sub>2</sub>O<sub>4</sub>Na requires 539.1947, found [MNa]<sup>+</sup> 539.1957; [ $\alpha$ ]<sub>D</sub><sup>20</sup> = -12.5 (c 1.0, CHCl<sub>3</sub>).

1,4-dibenzyl-6-(4-methoxyphenyl)-6-(3-oxo-3-phenylpropyl)piperazine-2,3,5-trione **2o**

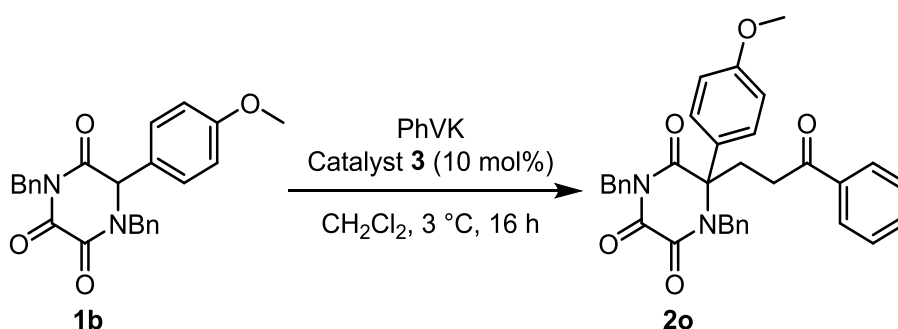

Following general procedure **Cii** using triketopiperazine **1b** (41 mg, 0.10 mmol), chiral catalyst **3** (4 mg, 10 μmol, 10 mol%), CH<sub>2</sub>Cl<sub>2</sub> (1 mL) and phenyl vinyl ketone (33 mg, 0.25 mmol). The reaction mixture was purified by flash column chromatography on silica gel (gradient: hexane:EtOAc = (4:1) to (2:1)) to afford **2o** (52 mg, 95%) as a colourless oil in 87:13 er as determined by HPLC analysis [Phenomenex Lux Cellulose-1, MeCN:water, 60:40, 1.0 ml/min, λ 220 nm, t(major) = 22.1 min, t(minor) = 26.0 min].

IR  $\nu_{\max}/\text{cm}^{-1}$  3061, 2958, 1741, 1678, 1603, 1511, 1447, 1415, 1362, 1256, 1227, 1182, 1077, 1030, 832, 733, 697;  $^1\text{H NMR}$  (400 MHz,  $\text{CDCl}_3$ )  $\delta$  7.53 – 7.46 (m, 1H), 7.38 – 7.27 (m, 8H), 7.25 – 7.18 (m, 5H), 7.07 – 6.98 (m, 2H), 6.96 – 6.89 (m, 3H), 5.21 (d,  $J = 14.8$  Hz, 1H), 5.13 (d,  $J = 13.5$  Hz, 1H), 4.97 (d,  $J = 13.6$  Hz, 1H), 3.83 (s, 3H), 3.76 (d,  $J = 14.8$  Hz, 1H), 3.14 (ddd,  $J = 14.4, 9.9, 6.5$  Hz, 1H), 2.58 (ddd,  $J = 14.6, 9.4, 5.6$  Hz, 1H), 2.39 – 2.23 (m, 2H);  $^{13}\text{C NMR}$  (101 MHz,  $\text{CDCl}_3$ )  $\delta$  196.9, 169.5, 160.4, 156.0, 155.2, 136.5, 136.1, 135.3, 133.2, 129.9, 129.4, 128.9, 128.8, 128.4, 128.3, 128.0, 127.7, 115.0, 72.6, 55.6, 48.8, 44.7, 32.5, 30.7;  $m/z$  (ES HRMS)  $\text{C}_{34}\text{H}_{30}\text{N}_2\text{O}_5\text{Na}$  requires 569.2052, found  $[\text{MNa}]^+$  569.2048;  $[\alpha]_D^{20} = -7.9$  (c 1.0,  $\text{CHCl}_3$ ).

1,4-dibenzyl-6-(4-nitrophenyl)-6-(3-oxo-3-phenylpropyl)piperazine-2,3,5-trione **2p**

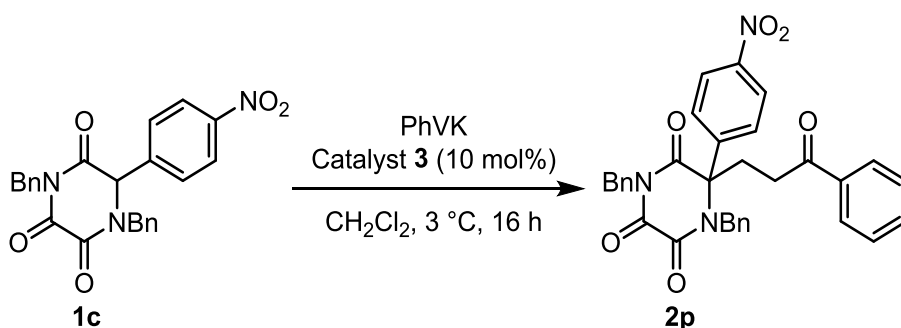

Following general procedure **Cii** using triketopiperazine **1c** (43 mg, 0.10 mmol), chiral catalyst **3** (4 mg, 10  $\mu\text{mol}$ , 10 mol%),  $\text{CH}_2\text{Cl}_2$  (1 mL) and phenyl vinyl ketone (33 mg, 0.25 mmol). The reaction mixture was purified by flash column chromatography on silica gel (gradient: hexane:EtOAc = (4:1) to (2:1)) to afford **2p** (49.5 mg, 88%) as a colourless oil in 4:96 er as determined by HPLC analysis [Phenomenex Lux Amylose-2, MeCN:water, 50:50, 1.0 ml/min,  $\lambda$  230 nm,  $t(\text{minor}) = 42.8$  min,  $t(\text{major}) = 50.2$  min].

IR  $\nu_{\max}/\text{cm}^{-1}$  3064, 3034, 1744, 1679, 1597, 1521, 1495, 1417, 1348, 1263, 1227, 1140, 1077, 907, 851, 727, 702;  $^1\text{H NMR}$  (400 MHz,  $\text{CDCl}_3$ )  $\delta$  8.24 – 8.18 (m, 2H), 7.60 – 7.56 (m, 2H), 7.55 – 7.50 (m, 1H), 7.41 – 7.31 (m, 6H), 7.24 – 7.19 (m, 3H), 7.19 – 7.14 (m, 2H), 7.05 – 6.98 (m, 2H), 6.98 – 6.93 (m, 1H), 5.16 – 5.05 (m, 2H), 4.99 (d,  $J = 13.5$  Hz, 1H), 3.90 (d,  $J = 14.8$  Hz, 1H), 3.22 – 3.12 (m, 1H), 2.78 – 2.69 (m, 1H), 2.45 – 2.31 (m, 2H);  $^{13}\text{C NMR}$  (101 MHz,  $\text{CDCl}_3$ )  $\delta$  196.4, 168.4, 155.5, 154.8, 148.4, 144.8, 135.9, 134.9, 133.5, 129.5, 128.9, 128.8, 128.6, 128.6, 128.3, 127.9, 127.8, 124.5, 72.5, 49.0, 45.0, 32.2, 31.0;  $m/z$  (ES HRMS)  $\text{C}_{33}\text{H}_{27}\text{N}_3\text{O}_6\text{Na}$  requires 584.1798, found  $[\text{MNa}]^+$  584.1803;  $[\alpha]_D^{20} = -5.5$  (c 1.0,  $\text{CHCl}_3$ ).



3-(1,4-dibenzyl-3,5,6-trioxo-2-phenylpiperazin-2-yl)propanal **2q**

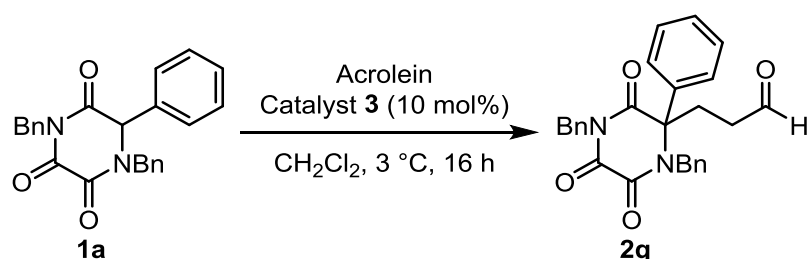

Following general procedure **Cii** using triketopiperazine **1a** (38 mg, 0.10 mmol), chiral catalyst **3** (4 mg, 10  $\mu\text{mol}$ , 10 mol%),  $\text{CH}_2\text{Cl}_2$  (1 mL) and acrolein (17  $\mu\text{L}$ , 0.25 mmol). The reaction mixture was purified by flash column chromatography on silica gel (gradient: hexane:EtOAc = (4:1) to (1:1)) to afford **2q** (37.2 mg, 85%) as a colourless oil.

**IR**  $\nu_{\text{max}}/\text{cm}^{-1}$  3035, 2943, 1738, 1711, 1680, 1495, 1418, 1361, 1303, 1265, 1148, 1072, 911, 754, 692;  **$^1\text{H NMR}$**  (400 MHz,  $\text{CDCl}_3$ )  $\delta$  9.07 (s, 1H), 7.47 – 7.17 (m, 15H), 5.29 (d,  $J = 14.8$  Hz, 1H), 5.07 (d,  $J = 13.6$  Hz, 1H), 4.93 (d,  $J = 13.6$  Hz, 1H), 3.64 (d,  $J = 14.8$  Hz, 1H), 3.05 (ddd,  $J = 14.4, 11.2, 5.3$  Hz, 1H), 2.45 (ddd,  $J = 14.7, 11.1, 3.8$  Hz, 1H), 1.97 – 1.75 (m, 2H);  **$^{13}\text{C NMR}$**  (101 MHz,  $\text{CDCl}_3$ )  $\delta$  198.2, 169.0, 155.7, 155.2, 137.8, 136.6, 135.0, 129.8, 129.7, 129.1, 129.1, 129.0, 128.7, 128.3, 126.2, 72.8, 49.0, 44.9, 38.1, 28.5;  **$m/z$**  (ES HRMS)  $\text{C}_{27}\text{H}_{24}\text{N}_2\text{O}_4\text{Na}$  requires 463.1634, found  $[\text{MNa}]^+$  463.1631.

6-(2-(1,3-dioxolan-2-yl)ethyl)-1,4-dibenzyl-6-phenylpiperazine-2,3,5-trione **S12**

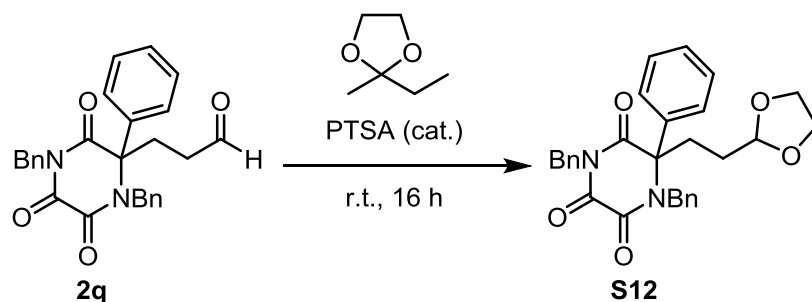

To a vial containing aldehyde **2q** (37 mg, 85  $\mu\text{mol}$ ) was added 2-ethyl-2-methyl-1,3-dioxolane (0.25 mL) and PTSA (5 mg) and the reaction mixture was stirred for 16 hours at room temperature. The solvent was removed under reduced pressure and the reaction mixture was purified by flash column chromatography on silica gel (gradient: hexane:EtOAc = (4:1) to (1:1)) to afford **S12** (40 mg, 98%) as a colourless oil in 42:58 er as determined by HPLC analysis [Phenomenex Lux Cellulose-1, MeCN:water, 50:50, 1.0 ml/min,  $\lambda$  230 nm,  $t(\text{minor}) = 25.7$  min,  $t(\text{major}) = 28.1$  min].

**IR**  $\nu_{\text{max}}/\text{cm}^{-1}$  3062, 2951, 2885, 1742, 1683, 1494, 1418, 1363, 1263, 1234, 1128, 1076, 1029, 732, 698;  **$^1\text{H NMR}$**  (400 MHz,  $\text{CDCl}_3$ )  $\delta$  7.50 – 7.20 (m, 15H), 5.15 (d,  $J = 13.6$  Hz, 1H), 5.07 –

4.98 (m, 2H), 4.35 (t,  $J = 4.9$  Hz, 1H), 3.95 (d,  $J = 14.8$  Hz, 1H), 3.81 – 3.67 (m, 4H), 2.93 (ddd,  $J = 13.8, 11.6, 5.1$  Hz, 1H), 2.30 (ddd,  $J = 13.8, 11.7, 4.2$  Hz, 1H), 1.35 – 1.13 (m, 2H);  $^{13}\text{C NMR}$  (101 MHz,  $\text{CDCl}_3$ )  $\delta$  169.5, 156.0, 154.9, 138.5, 136.5, 135.1, 129.5, 129.4, 129.3, 128.6, 128.6, 128.2, 127.9, 126.4, 103.1, 73.1, 64.8, 64.8, 48.8, 44.7, 30.7, 28.6;  $m/z$  (ES HRMS)  $\text{C}_{29}\text{H}_{28}\text{N}_2\text{O}_4\text{Na}$  requires 507.1896, found  $[\text{MNa}]^+$  507.1897.

## 2,7-Diazabicyclo[2.2.1]heptanes (4a-m)

2,7-dibenzyl-1-methyl-4-phenyl-2,7-diazabicyclo[2.2.1]heptan-3-one **4a**

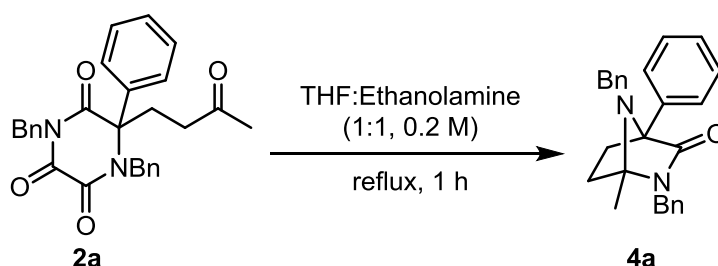

Following general procedure **D** using triketopiperazine **2a** (19 mg, 40  $\mu\text{mol}$ ), THF (0.1 mL) and ethanolamine (0.1 mL). After 1 hour the reaction mixture was concentrated under reduced pressure and the residue was purified by flash column chromatography on silica gel (gradient: hexane:EtOAc = (9:1) to (2:1)) to afford **4a** (13.9 mg, 87%) as a colourless oil in 92:8 er as determined by HPLC analysis [Phenomenex Lux Amylose-2, MeCN:water, 70:30, 1.0 ml/min,  $\lambda$  220 nm,  $t(\text{major}) = 8.1$  min,  $t(\text{minor}) = 9.8$  min].

$\text{IR } \nu_{\text{max}}/\text{cm}^{-1}$  3060, 3028, 2979, 2943, 1692, 1494, 1453, 1405, 1318, 1182, 955, 700;  $^1\text{H NMR}$  (400 MHz,  $\text{CDCl}_3$ )  $\delta$  8.07 – 7.99 (m, 2H), 7.41 – 7.24 (m, 8H), 7.24 – 7.09 (m, 5H), 4.58 (d,  $J = 15.2$  Hz, 1H), 4.30 (d,  $J = 15.2$  Hz, 1H), 3.46 (d,  $J = 15.6$  Hz, 1H), 3.37 (d,  $J = 15.6$  Hz, 1H), 2.29 – 2.16 (m, 1H), 1.98 – 1.86 (m, 2H), 1.60 – 1.49 (m, 1H), 1.12 (s, 3H).;  $^{13}\text{C NMR}$  (101 MHz,  $\text{CDCl}_3$ )  $\delta$  175.6, 140.8, 138.6, 136.5, 128.8, 128.5, 128.2, 128.2, 127.9, 127.8, 127.7, 127.6, 126.5, 84.1, 75.3, 46.8, 43.7, 35.3, 35.2, 18.2;  $m/z$  (ES HRMS)  $\text{C}_{26}\text{H}_{27}\text{N}_2\text{O}$  requires 383.2123, found  $[\text{MH}]^+$  383.2121;  $[\alpha]_{\text{D}}^{20} = 15.4$  (c 1.0,  $\text{CHCl}_3$ ).

2,7-dibenzyl-4-(4-methoxyphenyl)-1-methyl-2,7-diazabicyclo[2.2.1]heptan-3-one **4b**

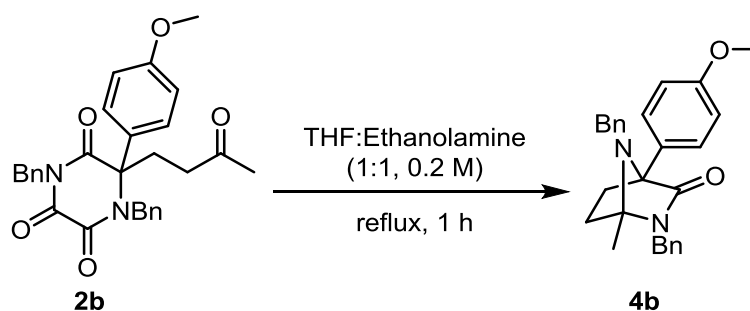

Following general procedure **D** using triketopiperazine **2b** (26 mg, 53  $\mu$ mol), THF (0.14 mL) and ethanolamine (0.14 mL). After 1 hour the reaction mixture was concentrated under reduced pressure and the residue was purified by flash column chromatography on silica gel (gradient: hexane:EtOAc = (9:1) to (2:1)) to afford **4b** (11.2 mg, 51%) as a colourless oil.

**IR**  $\nu_{\text{max}}/\text{cm}^{-1}$  2979, 2940, 2837, 1689, 1514, 1494, 1454, 1404, 1319, 1246, 1177, 1028, 831, 728, 699;  **$^1\text{H NMR}$**  (400 MHz,  $\text{CDCl}_3$ )  $\delta$  7.98 – 7.90 (m, 2H), 7.41 – 7.26 (m, 5H), 7.22 – 7.10 (m, 5H), 6.93 – 6.87 (m, 2H), 4.57 (d,  $J = 15.2$  Hz, 1H), 4.29 (d,  $J = 15.2$  Hz, 1H), 3.80 (s, 3H), 3.43 (d,  $J = 15.6$  Hz, 1H), 3.35 (d,  $J = 15.5$  Hz, 1H), 2.27 – 2.16 (m, 1H), 1.95 – 1.84 (m, 2H), 1.57 – 1.48 (m, 1H), 1.12 (s, 3H);  **$^{13}\text{C NMR}$**  (101 MHz,  $\text{CDCl}_3$ )  $\delta$  175.8, 159.2, 140.8, 138.6, 129.3, 128.7, 128.3, 128.2, 128.1, 127.7, 127.6, 126.5, 113.9, 84.0, 75.0, 55.4, 46.7, 43.7, 35.2, 34.9, 18.2;  **$m/z$**  (ES HRMS)  $\text{C}_{27}\text{H}_{29}\text{N}_2\text{O}_2$  requires 413.2229, found  $[\text{MH}]^+$  413.2231.

2,7-dibenzyl-1-methyl-4-(4-nitrophenyl)-2,7-diazabicyclo[2.2.1]heptan-3-one **4c**

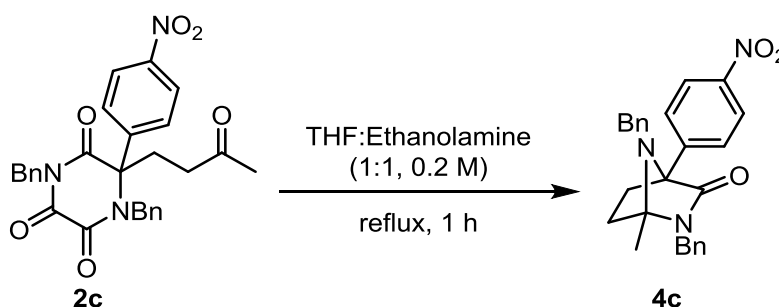

Following general procedure **D** using triketopiperazine **2c** (25 mg, 50  $\mu$ mol), THF (125  $\mu$ L) and ethanolamine (125  $\mu$ L). After 1 hour the reaction mixture was concentrated under reduced pressure and the residue was purified by flash column chromatography on silica gel (gradient: hexane:EtOAc = (9:1) to (2:1)) to afford **4c** (13.1 mg, 61%) as a colourless oil.

**IR**  $\nu_{\text{max}}/\text{cm}^{-1}$  2940, 2925, 2853, 1692, 1601, 1517, 1494, 1406, 1347, 1317, 1182, 1028, 956, 909, 852, 729, 698;  **$^1\text{H NMR}$**  (400 MHz,  $\text{CDCl}_3$ )  $\delta$  8.26 – 8.15 (m, 4H), 7.39 – 7.28 (m, 5H), 7.24 – 7.13 (m, 5H), 4.56 (d,  $J = 15.2$  Hz, 1H), 4.35 (d,  $J = 15.2$  Hz, 1H), 3.45 (d,  $J = 15.7$  Hz, 1H), 3.36 (d,  $J = 15.7$  Hz, 1H), 2.19 – 2.10 (m, 1H), 2.01 – 1.91 (m, 2H), 1.62 – 1.54 (m, 1H),

1.19 (s, 3H);  $^{13}\text{C}$  NMR (101 MHz,  $\text{CDCl}_3$ )  $\delta$  174.5, 147.4, 144.2, 139.8, 138.1, 128.9, 128.4, 128.2, 127.8, 127.5, 126.9, 123.6, 84.4, 74.9, 47.2, 43.9, 35.8, 35.5, 18.0;  $m/z$  (ES HRMS)  $\text{C}_{26}\text{H}_{26}\text{N}_3\text{O}_3$  requires 428.1974, found  $[\text{MH}]^+$  428.1975.

2,7-dibenzyl-4-(4-bromophenyl)-1-methyl-2,7-diazabicyclo[2.2.1]heptan-3-one **4d**

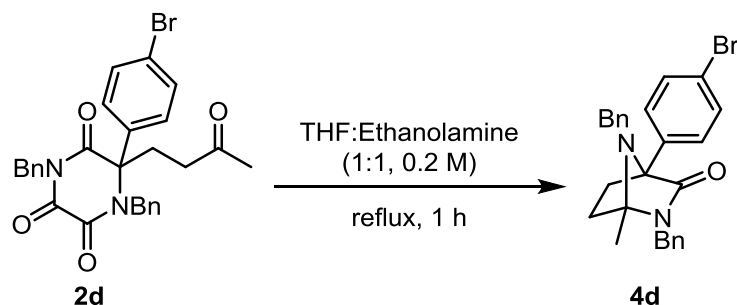

Following general procedure **D** using triketopiperazine **2d** (45 mg, 85  $\mu\text{mol}$ ), THF (215  $\mu\text{L}$ ) and ethanolamine (215  $\mu\text{L}$ ). After 1 hour the reaction mixture was concentrated under reduced pressure and the residue was purified by flash column chromatography on silica gel (gradient: hexane:EtOAc = (9:1) to (2:1)) to afford **4d** (23.1 mg, 60%) as a colourless oil.

IR  $\nu_{\text{max}}/\text{cm}^{-1}$  3030, 2923, 2850, 1693, 1493, 1405, 1318, 1182, 1011, 955, 823, 703;  $^1\text{H}$  NMR (400 MHz,  $\text{CDCl}_3$ )  $\delta$  7.93 – 7.88 (m, 2H), 7.50 – 7.45 (m, 2H), 7.38 – 7.27 (m, 5H), 7.23 – 7.11 (m, 5H), 4.55 (d,  $J$  = 15.2 Hz, 1H), 4.30 (d,  $J$  = 15.2 Hz, 1H), 3.38 (s, 2H), 2.19 – 2.10 (m, 1H), 1.95 – 1.86 (m, 2H), 1.55 – 1.49 (m, 1H), 1.13 (s, 3H);  $^{13}\text{C}$  NMR (101 MHz,  $\text{CDCl}_3$ )  $\delta$  175.2, 140.4, 138.4, 135.6, 131.6, 129.8, 128.8, 128.3, 128.2, 127.7, 127.6, 126.6, 122.0, 84.1, 74.9, 46.9, 43.8, 35.3, 18.1;  $m/z$  (ES HRMS)  $\text{C}_{26}\text{H}_{26}\text{N}_2\text{OBr}$  requires 461.1229, found  $[\text{MH}]^+$  461.1226.

2,7-dibenzyl-4-(furan-2-yl)-1-methyl-2,7-diazabicyclo[2.2.1]heptan-3-one **4e**

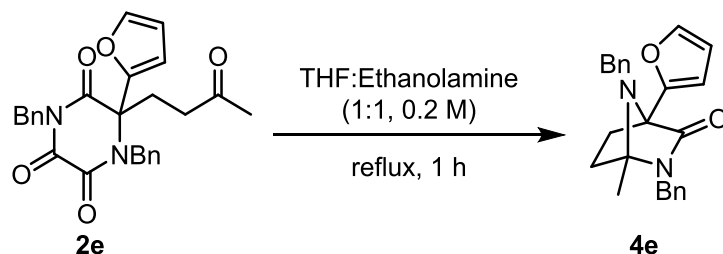

Following general procedure **D** using triketopiperazine **2e** (59 mg, 0.13 mmol), THF (325  $\mu\text{L}$ ) and ethanolamine (325  $\mu\text{L}$ ). After 1 hour the reaction mixture was concentrated under reduced pressure and the residue was purified by flash column chromatography on silica gel (gradient: hexane:EtOAc = (9:1) to (2:1)) to afford **4e** (36.6 mg, 75%) as a colourless oil.

**IR**  $\nu_{\text{max}}/\text{cm}^{-1}$  3028, 2945, 1697, 1494, 1454, 1405, 1312, 1185, 1006, 910, 729, 697;  **$^1\text{H NMR}$**  (400 MHz,  $\text{CDCl}_3$ )  $\delta$  7.39 – 7.27 (m, 6H), 7.19 – 7.13 (m, 2H), 7.13 – 7.08 (m, 3H), 6.92 (dd,  $J = 3.3, 0.9$  Hz, 1H), 6.34 (dd,  $J = 3.3, 1.8$  Hz, 1H), 4.52 (d,  $J = 15.2$  Hz, 1H), 4.35 (d,  $J = 15.2$  Hz, 1H), 3.49 – 3.36 (m, 2H), 2.57 (ddd,  $J = 12.1, 10.4, 4.1$  Hz, 1H), 1.88 (ddd,  $J = 11.5, 10.4, 4.2$  Hz, 1H), 1.74 (ddd,  $J = 12.1, 9.2, 4.3$  Hz, 1H), 1.49 (ddd,  $J = 11.4, 9.2, 4.2$  Hz, 1H), 1.21 (s, 3H);  **$^{13}\text{C NMR}$**  (101 MHz,  $\text{CDCl}_3$ )  $\delta$  174.2, 148.1, 142.9, 140.1, 138.3, 128.8, 128.2, 128.0, 127.7, 126.4, 111.8, 110.4, 84.3, 72.7, 47.1, 43.8, 35.1, 30.0, 17.9;  **$m/z$**  (ES HRMS)  $\text{C}_{24}\text{H}_{25}\text{N}_2\text{O}_2$  requires 373.1916, found  $[\text{MH}]^+$  373.1919.

2,7-dibenzyl-1-methyl-4-(thiophen-2-yl)-2,7-diazabicyclo[2.2.1]heptan-3-one **4f**

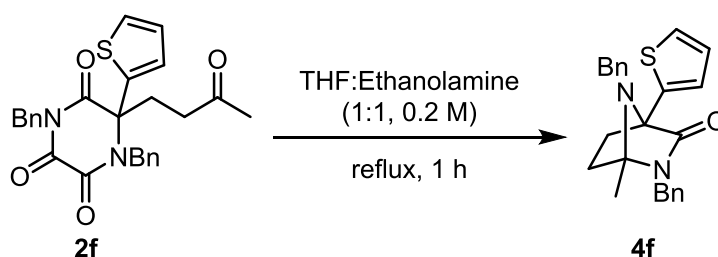

Following general procedure **D** using triketopiperazine **2f** (12 mg, 26  $\mu\text{mol}$ ), THF (65  $\mu\text{L}$ ) and ethanolamine (65  $\mu\text{L}$ ). After 1 hour the reaction mixture was concentrated under reduced pressure and the residue was purified by flash column chromatography on silica gel (gradient: hexane:EtOAc = (9:1) to (2:1)) to afford **4f** (5 mg, 50%) as a colourless oil in 93:7 er as determined by HPLC analysis [Phenomenex Lux Amylose-2, MeCN:water, 70:30, 1.0 ml/min,  $\lambda$  220 nm,  $t(\text{major}) = 7.8$  min,  $t(\text{minor}) = 9.4$  min].

**IR**  $\nu_{\text{max}}/\text{cm}^{-1}$  3062, 2928, 2851, 1699, 1484, 1454, 1405, 1296, 1182, 1028, 842, 700;  **$^1\text{H NMR}$**  (400 MHz,  $\text{CDCl}_3$ )  $\delta$  7.62 (dd,  $J = 3.6, 1.2$  Hz, 1H), 7.38 – 7.28 (m, 6H), 7.22 – 7.10 (m, 5H), 7.02 (dd,  $J = 5.1, 3.6$  Hz, 1H), 4.53 (d,  $J = 15.2$  Hz, 1H), 4.35 (d,  $J = 15.2$  Hz, 1H), 3.49 (d,  $J = 15.4$  Hz, 1H), 3.34 (d,  $J = 15.3$  Hz, 1H), 2.30 (ddd,  $J = 12.2, 10.3, 4.2$  Hz, 1H), 1.98 (ddd,  $J = 12.2, 9.1, 4.3$  Hz, 1H), 1.90 (ddd,  $J = 11.6, 10.3, 4.3$  Hz, 1H), 1.49 (ddd,  $J = 11.6, 9.2, 4.3$  Hz, 1H), 1.12 (s, 3H);  **$^{13}\text{C NMR}$**  (101 MHz,  $\text{CDCl}_3$ )  $\delta$  174.5, 140.6, 138.3, 128.8, 128.3, 128.1, 127.9, 127.7, 126.9, 126.5, 126.2, 84.5, 73.9, 46.7, 43.9, 36.0, 35.2, 18.2;  **$m/z$**  (ES HRMS)  $\text{C}_{24}\text{H}_{25}\text{N}_2\text{OS}$  requires 389.1688, found  $[\text{MH}]^+$  389.1685;  $[\alpha]_D^{20} = -7.3$  (c 1.0,  $\text{CHCl}_3$ ).

2,7-dibenzyl-4-(2-bromophenyl)-1-methyl-2,7-diazabicyclo[2.2.1]heptan-3-one **4g**

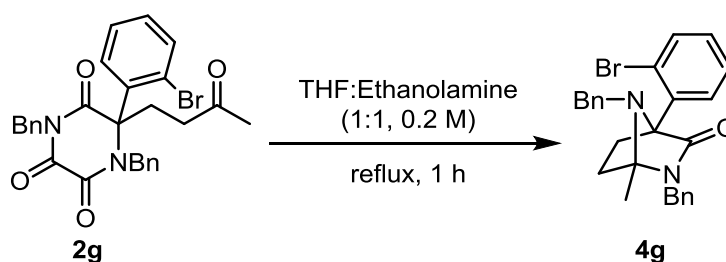

Following general procedure **D** using triketopiperazine **2g** (36 mg, 68  $\mu\text{mol}$ ), THF (175  $\mu\text{L}$ ) and ethanolamine (175  $\mu\text{L}$ ). After 1 hour the reaction mixture was concentrated under reduced pressure and the residue was purified by flash column chromatography on silica gel (gradient: hexane:EtOAc = (9:1) to (2:1)) to afford **4g** (9 mg, 29%) as a colourless oil.

**IR**  $\nu_{\text{max}}/\text{cm}^{-1}$  2921, 2850, 1688, 1494, 1455, 1406, 1313, 1028, 755, 698;  **$^1\text{H NMR}$**  (500 MHz,  $\text{CDCl}_3$ )  $\delta$  7.61 (d,  $J = 7.9$  Hz, 1H), 7.47 – 7.08 (m, 13H), 4.65 (br s, 1H), 4.27 (d,  $J = 15.5$  Hz, 1H), 3.32 (d,  $J = 15.1$  Hz, 1H), 3.23 (d,  $J = 15.5$  Hz, 1H), 1.99 (ddd,  $J = 11.8, 10.2, 4.5$  Hz, 1H), 1.85 (br s, 1H), 1.62 (br s, 2H), 1.10 (s, 3H);  **$^{13}\text{C NMR}$**  (126 MHz,  $\text{CDCl}_3$ )  $\delta$  175.1, 140.1, 138.5, 135.5, 133.9, 132.0, 129.9, 128.7, 128.4, 128.1, 128.0, 127.5, 127.2, 126.6, 84.0, 77.4, 48.0, 43.4, 34.8, 29.2, 18.2;  **$m/z$**  (ES HRMS)  $\text{C}_{26}\text{H}_{26}\text{N}_2\text{OBr}$  requires 461.1229, found  $[\text{MH}]^+$  461.1233.

2,7-dibenzyl-1-methyl-4-(1-methyl-1H-pyrrol-2-yl)-2,7-diazabicyclo[2.2.1]heptan-3-one **4h**

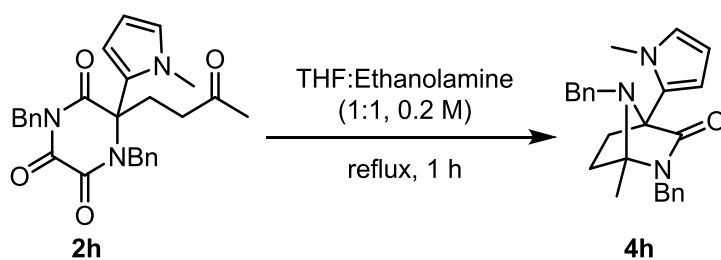

Following general procedure **D** using triketopiperazine **2h** (34.7 mg, 76  $\mu\text{mol}$ ), THF (190  $\mu\text{L}$ ) and ethanolamine (190  $\mu\text{L}$ ). After 1 hour the reaction mixture was concentrated under reduced pressure and the residue was purified by flash column chromatography on silica gel (gradient: hexane:EtOAc = (9:1) to (2:1)) to afford **4h** (7.5 mg, 26%) as a colourless oil.

**IR**  $\nu_{\text{max}}/\text{cm}^{-1}$  3029, 2924, 2852, 1702, 1494, 1453, 1404, 1322, 1274, 1225, 1179, 1028, 950, 700;  **$^1\text{H NMR}$**  (400 MHz,  $\text{CDCl}_3$ )  $\delta$  7.35 – 7.25 (m, 5H), 7.21 – 7.10 (m, 3H), 7.06 – 7.01 (m, 2H), 6.66 (s, 1H), 6.53 (dd,  $J = 2.7, 1.8$  Hz, 1H), 6.09 (dd,  $J = 3.7, 2.7$  Hz, 1H), 4.54 (d,  $J = 15.4$  Hz, 1H), 4.39 (d,  $J = 15.4$  Hz, 1H), 3.58 (s, 3H), 3.35 (d,  $J = 15.2$  Hz, 1H), 3.23 (d,  $J = 15.2$  Hz, 1H), 2.43 (ddd,  $J = 13.6, 10.4, 3.9$  Hz, 1H), 1.92 – 1.80 (m, 2H), 1.57 – 1.50 (m, 1H), 1.26 (s, 3H);  **$^{13}\text{C NMR}$**  (101 MHz,  $\text{CDCl}_3$ )  $\delta$  175.0, 140.0, 138.4, 128.8, 128.1, 127.9, 127.5, 126.5,

124.7, 112.1, 107.0, 84.0, 72.6, 47.4, 43.3, 35.2, 33.5, 29.4, 17.7; *m/z* (ES HRMS) C<sub>25</sub>H<sub>28</sub>N<sub>3</sub>O requires 386.2232, found [MH]<sup>+</sup> 386.2230.

2,7-dibenzyl-1-methyl-4-(1-methyl-1H-pyrrol-3-yl)-2,7-diazabicyclo[2.2.1]heptan-3-one **4i**

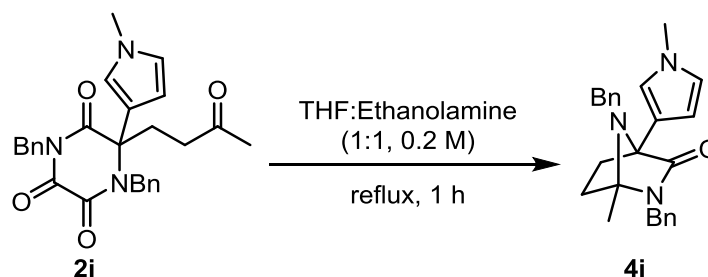

Following general procedure **D** using triketopiperazine **2i** (16 mg, 35 μmol), THF (100 μL) and ethanolamine (100 μL). After 1 hour the reaction mixture was concentrated under reduced pressure and the residue was purified by flash column chromatography on silica gel (gradient: hexane:EtOAc = (9:1) to (2:1)) to afford **4i** (3.3 mg, 25%) as a colourless oil.

**IR**  $\nu_{\text{max}}/\text{cm}^{-1}$  2922, 2852, 1693, 1494, 1453, 1410, 1272, 1207, 1079, 1028, 793, 733, 700; **<sup>1</sup>H NMR** (400 MHz, CDCl<sub>3</sub>)  $\delta$  7.38 – 7.23 (m, 7H), 7.19 – 7.15 (m, 3H), 7.14 – 7.09 (m, 1H), 6.55 (t, *J* = 2.5 Hz, 1H), 6.27 (dd, *J* = 2.7, 1.7 Hz, 1H), 4.54 (d, *J* = 15.4 Hz, 1H), 4.27 (d, *J* = 15.2 Hz, 1H), 3.64 (s, 3H), 3.58 (d, *J* = 15.5 Hz, 1H), 3.27 (d, *J* = 15.3 Hz, 1H), 2.29 – 2.19 (m, 1H), 1.86 – 1.74 (m, 2H), 1.48 – 1.41 (m, 1H), 1.08 (s, 3H); **<sup>13</sup>C NMR** (101 MHz, CDCl<sub>3</sub>)  $\delta$  176.5, 141.6, 138.8, 128.7, 128.2, 128.0, 128.0, 127.5, 126.2, 122.4, 122.0, 117.8, 107.8, 84.2, 72.9, 46.4, 43.8, 36.3, 35.1, 34.1, 18.3; *m/z* (ES HRMS) C<sub>25</sub>H<sub>28</sub>N<sub>3</sub>O requires 386.2232, found [MH]<sup>+</sup> 386.2233.

2,7-dibenzyl-4-(1H-indol-3-yl)-1-methyl-2,7-diazabicyclo[2.2.1]heptan-3-one **4j**

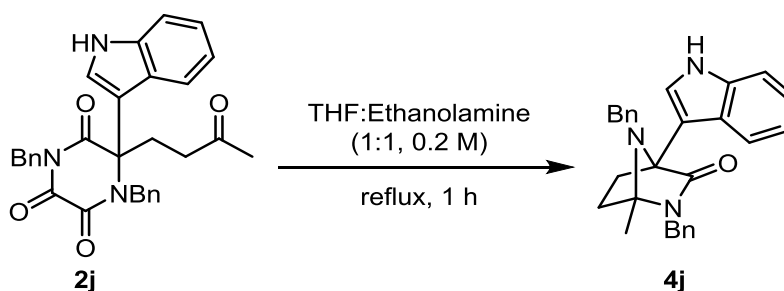

Following general procedure **D** using triketopiperazine **2j** (9.5 mg, 19 μmol), THF (50 μL) and ethanolamine (50 μL). After 1 hour the reaction mixture was concentrated under reduced pressure and the residue was purified by flash column chromatography on silica gel (gradient: hexane:EtOAc = (9:1) to (2:1)) to afford **4j** (2 mg, 21%) as a colourless oil.

**IR**  $\nu_{\text{max}}/\text{cm}^{-1}$  3300, 2924, 2852, 1680, 1494, 1455, 1409, 1351, 1217, 1074, 942, 741, 700;  **$^1\text{H}$  NMR** (500 MHz,  $\text{CDCl}_3$ )  $\delta$  8.28 – 8.19 (m, 2H), 8.02 (d,  $J = 8.0$  Hz, 1H), 7.40 – 7.31 (m, 5H), 7.31 – 7.26 (m, 1H), 7.19 – 7.09 (m, 6H), 7.07 – 7.03 (m, 1H), 4.56 (d,  $J = 15.2$  Hz, 1H), 4.37 (d,  $J = 15.2$  Hz, 1H), 3.46 (d,  $J = 15.2$  Hz, 1H), 3.30 (d,  $J = 15.1$  Hz, 1H), 2.72 (ddd,  $J = 12.4, 10.3, 4.0$  Hz, 1H), 1.96 (ddd,  $J = 11.6, 10.3, 4.4$  Hz, 1H), 1.73 (ddd,  $J = 12.4, 9.3, 4.4$  Hz, 1H), 1.57 – 1.49 (m, 1H), 1.11 (s, 3H);  **$^{13}\text{C}$  NMR** (126 MHz,  $\text{CDCl}_3$ )  $\delta$  176.4, 140.9, 138.6, 136.4, 128.8, 128.2, 128.0, 128.0, 127.6, 126.3, 126.2, 125.4, 122.2, 120.9, 119.7, 111.3, 109.7, 84.2, 73.0, 47.2, 43.7, 35.5, 31.8, 18.6;  **$m/z$**  (ES HRMS)  $\text{C}_{28}\text{H}_{28}\text{N}_3\text{O}$  requires 422.2232, found  $[\text{MH}]^+$  422.2235.

2,7-dibenzyl-1-ethyl-4-phenyl-2,7-diazabicyclo[2.2.1]heptan-3-one **4k**

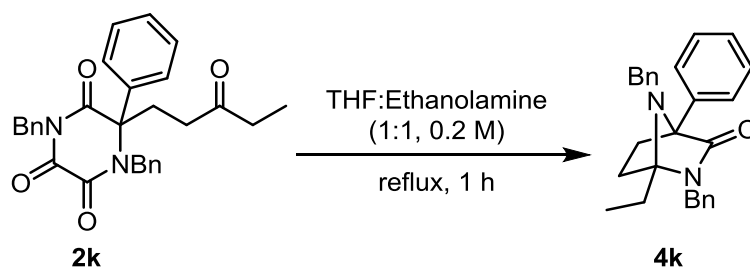

Following general procedure **D** using triketopiperazine **2k** (24 mg, 50  $\mu\text{mol}$ ), THF (125  $\mu\text{L}$ ) and ethanolamine (125  $\mu\text{L}$ ). After 1 hour the reaction mixture was concentrated under reduced pressure and the residue was purified by flash column chromatography on silica gel (gradient: hexane:EtOAc = (9:1) to (2:1)) to afford **4k** (9.8 mg, 50%) as a colourless oil.

**IR**  $\nu_{\text{max}}/\text{cm}^{-1}$  3030, 2931, 2850, 1692, 1494, 1453, 1399, 1314, 1074, 1028, 760, 734, 700;  **$^1\text{H}$  NMR** (400 MHz,  $\text{CDCl}_3$ )  $\delta$  8.07 – 7.99 (m, 2H), 7.42 – 7.21 (m, 8H), 7.17 – 7.07 (m, 5H), 4.63 (d,  $J = 15.4$  Hz, 1H), 4.27 (d,  $J = 15.3$  Hz, 1H), 3.37 (s, 2H), 2.28 – 2.19 (m, 1H), 2.10 (ddd,  $J = 11.7, 10.4, 4.0$  Hz, 1H), 1.90 (ddd,  $J = 12.1, 9.3, 3.9$  Hz, 1H), 1.71 (dq,  $J = 14.9, 7.5$  Hz, 1H), 1.54 (dq,  $J = 14.7, 7.4$  Hz, 1H), 1.44 – 1.35 (m, 1H), 0.55 (t,  $J = 7.4$  Hz, 3H);  **$^{13}\text{C}$  NMR** (101 MHz,  $\text{CDCl}_3$ )  $\delta$  176.3, 140.1, 138.8, 136.3, 128.7, 128.4, 128.3, 128.1, 128.0, 127.8, 127.5, 126.5, 88.1, 75.7, 47.1, 43.7, 34.2, 30.8, 23.0, 7.8;  **$m/z$**  (ES HRMS)  $\text{C}_{27}\text{H}_{29}\text{N}_2\text{O}$  requires 397.2280, found  $[\text{MH}]^+$  397.2281.



2,7-dibenzyl-1,4-diphenyl-2,7-diazabicyclo[2.2.1]heptan-3-one **4l**

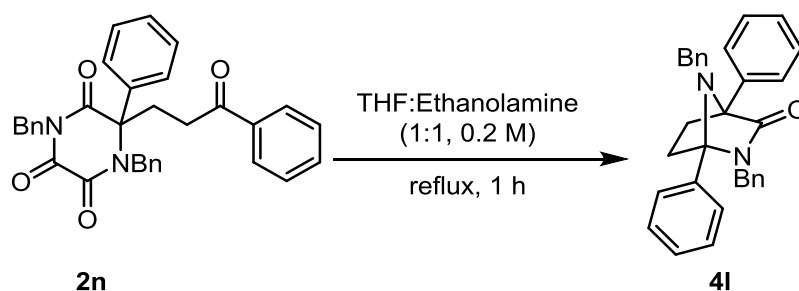

Following general procedure **D** using triketopiperazine **2n** (18 mg, 35  $\mu\text{mol}$ ), THF (90  $\mu\text{L}$ ) and ethanolamine (90  $\mu\text{L}$ ). After 1 hour the reaction mixture was concentrated under reduced pressure and the residue was purified by flash column chromatography on silica gel (gradient: hexane:EtOAc = (9:1) to (2:1)) to afford **4l** (13 mg, 84%) as a colourless oil.

**IR**  $\nu_{\text{max}}/\text{cm}^{-1}$  3059, 3031, 2926, 1705, 1494, 1450, 1398, 1322, 1198, 1074, 1029, 951, 911, 752, 731, 695;  **$^1\text{H NMR}$**  (400 MHz,  $\text{CDCl}_3$ )  $\delta$  7.52 – 7.47 (m, 2H), 7.42 – 7.36 (m, 2H), 7.31 – 7.14 (m, 9H), 6.96 – 6.87 (m, 5H), 6.75 – 6.68 (m, 2H), 4.56 (d,  $J$  = 14.6 Hz, 1H), 3.82 (d,  $J$  = 14.7 Hz, 1H), 3.16 (d,  $J$  = 14.4 Hz, 1H), 3.07 (d,  $J$  = 14.4 Hz, 1H), 2.63 – 2.48 (m, 2H), 2.10 (ddd,  $J$  = 11.2, 8.7, 3.2 Hz, 1H), 1.87 (ddd,  $J$  = 11.9, 8.7, 2.8 Hz, 1H);  **$^{13}\text{C NMR}$**  (101 MHz,  $\text{CDCl}_3$ )  $\delta$  175.7, 139.4, 137.6, 134.6, 133.1, 130.3, 129.7, 129.5, 128.8, 128.7, 128.4, 128.2, 128.2, 127.5, 127.4, 126.1, 88.6, 77.5, 48.3, 44.2, 30.3, 26.5;  **$m/z$**  (ES HRMS)  $\text{C}_{31}\text{H}_{29}\text{N}_2\text{O}$  requires 445.2280, found  $[\text{MH}]^+$  445.2281.

2,7-dibenzyl-4-phenyl-2,7-diazabicyclo[2.2.1]heptan-3-one **4m**

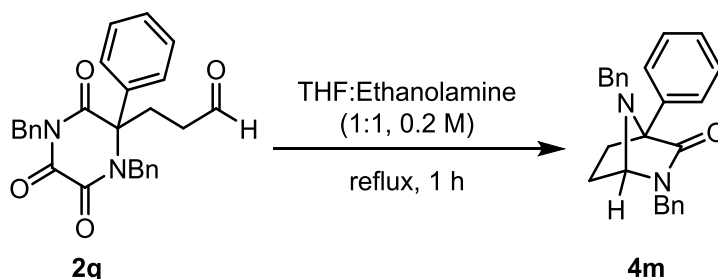

Following general procedure **D** using triketopiperazine **2q** (19 mg, 44  $\mu\text{mol}$ ), THF (110  $\mu\text{L}$ ) and ethanolamine (110  $\mu\text{L}$ ). After 1 hour the reaction mixture was concentrated under reduced pressure and the residue was purified by flash column chromatography on silica gel (gradient: hexane:EtOAc = (9:1) to (2:1)) to afford **4m** (4.4 mg, 28%) as a colourless oil.

**IR**  $\nu_{\text{max}}/\text{cm}^{-1}$  2916, 2854, 1694, 1494, 1451, 1411, 1330, 1249, 701;  **$^1\text{H NMR}$**  (400 MHz,  $\text{CDCl}_3$ )  $\delta$  8.07 – 8.02 (m, 2H), 7.46 – 7.30 (m, 8H), 7.16 – 7.11 (m, 3H), 6.85 – 6.79 (m, 2H), 4.84 (d,  $J$  = 14.7 Hz, 1H), 4.26 (d,  $J$  = 2.4 Hz, 1H), 3.91 (d,  $J$  = 14.7 Hz, 1H), 3.33 (d,  $J$  = 13.0 Hz, 1H), 3.02 (d,  $J$  = 13.0 Hz, 1H), 2.26 – 2.17 (m, 1H), 2.00 – 1.91 (m, 2H), 1.65 – 1.59 (m, 1H);  **$^{13}\text{C NMR}$**

(126 MHz, CDCl<sub>3</sub>)  $\delta$  174.0, 138.7, 137.0, 135.4, 129.0, 129.0, 128.8, 128.6, 128.3, 128.0, 127.9, 127.9, 127.1, 84.1, 73.9, 48.6, 44.8, 29.9, 28.0; *m/z* (ES HRMS) C<sub>25</sub>H<sub>25</sub>N<sub>2</sub>O requires 369.1967, found [MH]<sup>+</sup> 369.1966.

## Reduction of 4a

*N*,1-dibenzyl-5-methyl-2-phenylpyrrolidine-2-carboxamide **5a** and **5b**

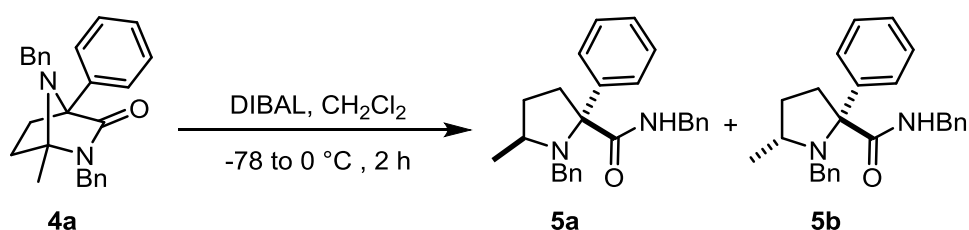

To a solution of diazabicyclic **4a** (29 mg, 77  $\mu$ mol) in CH<sub>2</sub>Cl<sub>2</sub> (0.5 mL) was added DIBAL (65  $\mu$ L, 77  $\mu$ mol) at -78 °C. After 1 hour a further equivalent of DIBAL (65  $\mu$ L, 77  $\mu$ mol) was added and the reaction mixture was allowed to warm to 0 °C over 1 hour. The reaction mixture was then diluted with CH<sub>2</sub>Cl<sub>2</sub> (2 mL) followed by the addition of aqueous Rochelle's salt (3 mL, 20% w/w) and stirred vigorously for 1 hour. The reaction mixture was extracted with CH<sub>2</sub>Cl<sub>2</sub> (3 x 3 mL) and the combined organic layers were washed with brine (5 mL), dried over MgSO<sub>4</sub>, concentrated under reduced pressure and the residue was purified by flash chromatography on silica gel (hexane:EtOAc = 9:1) to afford **5a** (11.4 mg, 39%) and **5b** (5.4 mg, 18%) as colourless oils.

**Major** (2*R*, 5*S*) or (2*S*, 5*R*) *N*,1-dibenzyl-5-methyl-2-phenylpyrrolidine-2-carboxamide **5a**

IR  $\nu_{\max}$ /cm<sup>-1</sup> 3351, 3060, 3028, 2958, 2924, 2864, 1666, 1495, 1452, 1374, 1317, 1111, 1077, 1027, 748, 698; <sup>1</sup>H NMR (400 MHz, CDCl<sub>3</sub>)  $\delta$  8.50 (s, 1H), 7.38 – 7.19 (m, 10H), 7.14 – 7.03 (m, 3H), 6.85 – 6.78 (m, 2H), 4.48 (dd, *J* = 14.6, 5.9 Hz, 1H), 4.36 (dd, *J* = 14.6, 5.7 Hz, 1H), 3.41 (d, *J* = 14.3 Hz, 1H), 3.23 – 3.12 (m, 2H), 2.69 (ddd, *J* = 13.1, 7.4, 2.4 Hz, 1H), 2.52 (ddd, *J* = 13.1, 11.4, 7.2 Hz, 1H), 2.08 (dddd, *J* = 13.0, 7.1, 6.0, 2.4 Hz, 1H), 1.48 (dddd, *J* = 12.5, 11.3, 10.0, 7.4 Hz, 1H), 0.98 (d, *J* = 6.0 Hz, 3H); <sup>13</sup>C NMR (101 MHz, CDCl<sub>3</sub>)  $\delta$  175.8, 140.7, 139.4, 138.6, 129.3, 128.8, 128.7, 128.3, 128.2, 128.0, 127.7, 127.5, 126.9, 78.3, 63.3, 55.4, 43.8, 38.1, 33.1, 22.2; *m/z* (ES HRMS) C<sub>26</sub>H<sub>29</sub>N<sub>2</sub>O requires 385.2280, found [MH]<sup>+</sup> 385.2279.

**Minor** (2*R*, 5*R*) or (2*S*, 5*S*) *N*,1-dibenzyl-5-methyl-2-phenylpyrrolidine-2-carboxamide **5b**

IR  $\nu_{\max}$ /cm<sup>-1</sup> 3349, 3060, 3028, 2958, 2924, 2852, 1657, 1495, 1453, 1371, 1208, 1119, 1079, 1028, 751, 698; <sup>1</sup>H NMR (500 MHz, CDCl<sub>3</sub>)  $\delta$  7.50 – 7.45 (m, 2H), 7.37 – 7.24 (m, 8H), 7.21 – 7.12 (m, 5H), 4.54 (dd, *J* = 14.6, 5.9 Hz, 1H), 4.45 (dd, *J* = 14.6, 5.5 Hz, 1H), 3.60 (d, *J* = 14.7 Hz, 1H), 3.46 (d, *J* = 14.7 Hz, 1H), 3.40 (pd, *J* = 6.5, 3.6 Hz, 1H), 2.70 (ddd, *J* = 12.9, 7.8, 3.6 Hz,

1H), 2.41 (ddd,  $J = 13.0, 10.0, 7.9$  Hz, 1H), 2.15 – 2.06 (m, 1H), 1.64 – 1.51 (m, 1H), 0.96 (d,  $J = 6.4$  Hz, 2H);  $^{13}\text{C}$  NMR (126 MHz,  $\text{CDCl}_3$ )  $\delta$  175.1, 141.5, 140.6, 138.5, 128.9, 128.5, 128.4, 128.4, 128.2, 128.0, 127.6, 127.4, 126.8, 77.6, 57.5, 52.4, 43.9, 38.2, 31.7, 19.4, 1.2;  $m/z$  (ES HRMS)  $\text{C}_{26}\text{H}_{29}\text{N}_2\text{O}$  requires 385.2280, found  $[\text{MH}]^+$  385.2282.

## Formation of Iminium 6

1-benzyl-2-(benzylcarbamoyl)-5-methyl-2-phenyl-3,4-dihydro-2H-pyrrol-1-ium chloride **6**

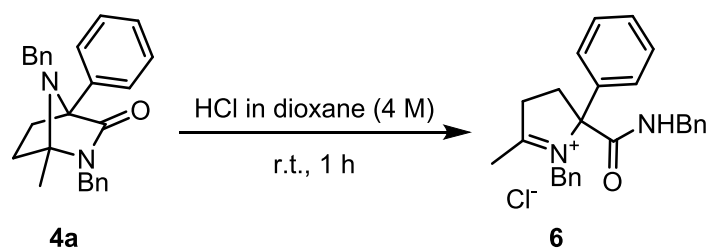

To a round bottomed flask containing diazabicyclic **4a** (39 mg, 0.1 mmol) was added HCl in dioxane (0.2 mL, 4 M) and the reaction mixture was stirred at room temperature for 1 hour. The solvent was removed under reduced pressure to afford **6** (quant.) as a colourless residue.

**IR**  $\nu_{\text{max}}/\text{cm}^{-1}$  3169, 3030, 1666, 1530, 1496, 1452, 1359, 1271, 1127, 1079, 1028, 957, 729, 696;  $^1\text{H}$  NMR (400 MHz,  $\text{CDCl}_3$ )  $\delta$  10.04 (t,  $J = 6.0$  Hz, 1H), 7.50 – 7.43 (m, 2H), 7.42 – 7.33 (m, 2H), 7.31 – 7.15 (m, 6H), 7.14 – 7.03 (m, 3H), 6.66 – 6.58 (m, 2H), 5.31 (d,  $J = 16.2$  Hz, 1H), 4.72 (d,  $J = 16.2$  Hz, 1H), 4.55 – 4.43 (m, 2H), 3.80 – 3.67 (m, 1H), 3.27 (d,  $J = 14.1$  Hz, 3H), 2.53 (s, 3H);  $^{13}\text{C}$  NMR (101 MHz,  $\text{CDCl}_3$ )  $\delta$  196.5, 168.2, 138.6, 133.8, 131.2, 130.4, 129.2, 129.0, 128.7, 128.5, 127.3, 126.9, 89.0, 54.1, 44.1, 40.5, 33.4, 21.4;  $m/z$  (ES HRMS)  $\text{C}_{26}\text{H}_{27}\text{N}_2\text{O}$  requires 383.2123, found  $[\text{M}]^+$  383.2124.

## Synthesis of harmicine Amide **S10**

### *N*-benzyl-2-chloro-2-phenylacetamide **S13**

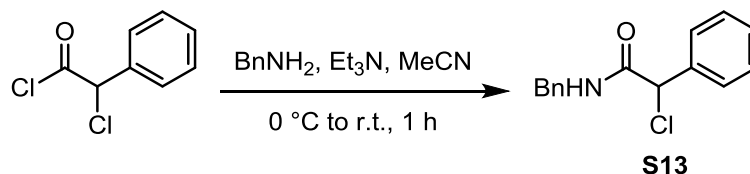

To a solution of benzylamine (0.69 mL, 6.33 mmol) and triethylamine (1.06 mL, 7.60 mmol) in MeCN (30 mL) was added  $\alpha$ -chlorophenylacetyl chloride (1.0 mL, 6.33 mmol) dropwise at 0 °C. The reaction mixture was allowed to warm to room temperature over 1 hour then filtered, washed with MeCN (3 x 5 mL) and the filtrate was concentrated under reduced pressure. The residue was diluted with CH<sub>2</sub>Cl<sub>2</sub> (20 mL) and washed with 1 M HCl (20 mL), the organic layer was dried with MgSO<sub>4</sub>, filtered and concentrated under reduced pressure to afford **S13** as a pale yellow solid (1.55 g, 95%).

**IR**  $\nu_{\text{max}}/\text{cm}^{-1}$  3289, 3064, 3031, 1659, 1530, 1496, 1454, 1213, 1029, 730, 695; **<sup>1</sup>H NMR** (400 MHz, CDCl<sub>3</sub>)  $\delta$  7.61 – 7.05 (m, 10H), 6.91 (br s, 1H), 5.33 (s, 1H), 4.42 (d,  $J$  = 5.7 Hz, 2H); **<sup>13</sup>C NMR** (101 MHz, CDCl<sub>3</sub>)  $\delta$  167.5, 137.5, 137.2, 129.3, 129.1, 129.0, 127.9, 61.9, 44.3;  **$m/z$**  (ES) C<sub>15</sub>H<sub>14</sub>NOCINa requires 282.7, found [MNa]<sup>+</sup> 282.3. Data is in agreement with literature.<sup>6</sup>

### 2-((2-(1H-indol-3-yl)ethyl)amino)-*N*-benzyl-2-phenylacetamide **S14**

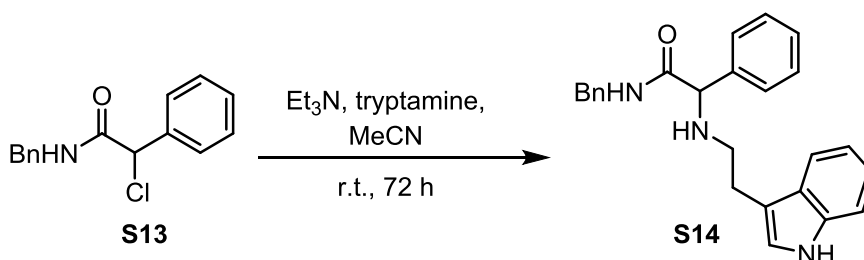

To a solution of **S13** (457 mg, 1.76 mmol) and triethylamine (0.98 mL, 7.04 mmol) in MeCN (9 mL) was added tryptamine (705 mg, 4.40 mmol) in one portion. The reaction mixture was stirred for 72 hours at room temperature. The reaction mixture was concentrated under reduced pressure and the residue was diluted with CH<sub>2</sub>Cl<sub>2</sub> (15 mL), washed with 1 M HCl (15 mL), and the organic layer was dried with MgSO<sub>4</sub>, filtered and concentrated under reduced pressure. The residue was then purified by flash column chromatography (CH<sub>2</sub>Cl<sub>2</sub>:Acetone = 9:1) to afford **S14** (215 mg, 32%) as a brown oil.

**IR**  $\nu_{\text{max}}/\text{cm}^{-1}$  3297, 3059, 2924, 2846, 1654, 1520, 1454, 1230, 908, 731; **<sup>1</sup>H NMR** (400 MHz, CDCl<sub>3</sub>)  $\delta$  8.05 (s, 1H), 7.57 – 7.50 (m, 1H), 7.35 – 7.24 (m, 8H), 7.17 (ddd,  $J$  = 8.2, 7.0, 1.2 Hz,

1H), 7.14 – 7.06 (m, 3H), 6.88 (d,  $J = 2.3$  Hz, 1H), 4.36 (dd,  $J = 14.9, 6.2$  Hz, 1H), 4.26 (s, 1H), 4.19 (dd,  $J = 14.9, 5.8$  Hz, 1H), 3.05 – 2.87 (m, 4H), 1.99 (br s, 2H);  $^{13}\text{C}$  NMR (101 MHz,  $\text{CDCl}_3$ )  $\delta$  172.3, 139.4, 138.5, 136.5, 128.9, 128.7, 128.2, 127.6, 127.4, 127.4, 122.2, 119.5, 118.9, 113.5, 111.4, 67.7, 48.8, 43.1, 25.9;  $m/z$  (ES HRMS)  $\text{C}_{25}\text{H}_{26}\text{N}_3\text{O}$  requires 384.2076, found  $[\text{MH}]^+$  384.2084.

1-(2-(1H-indol-3-yl)ethyl)-4-benzyl-6-phenylpiperazine-2,3,5-trione **7**

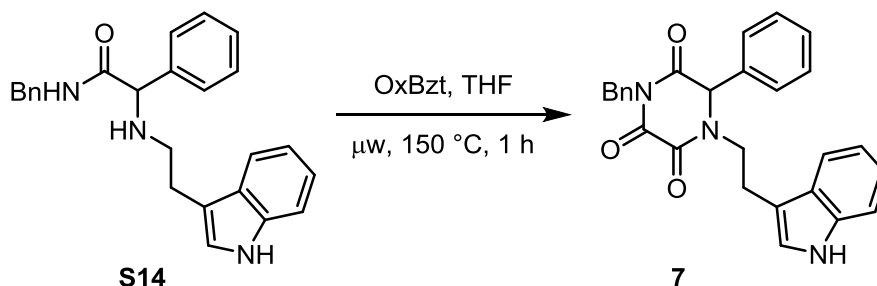

Following general procedure **B** using 1,1'-(1,2-dioxoethane-1,2-diyl)bis-1H-benzotriazole (171 mg, 0.59 mmol) in THF (1.5 mL), **S14** (187 mg, 0.49 mmol) in THF (2 mL). The residue was purified by flash column chromatography on silica gel (gradient:  $\text{CH}_2\text{Cl}_2/\text{MeOH} = (1:0)$  to (99:1)) to afford **7** (67.5 mg, 32%) as a waxy yellow solid.

$\text{IR } \nu_{\text{max}}/\text{cm}^{-1}$  3332, 3057, 3034, 2937, 1744, 1683, 1454, 1428, 1362, 1198, 908, 732;  $^1\text{H}$  NMR (400 MHz,  $\text{CDCl}_3$ )  $\delta$  8.08 (s, 1H), 7.44 (dd,  $J = 7.9, 1.0$  Hz, 1H), 7.40 – 7.27 (m, 4H), 7.25 (d,  $J = 8.9$  Hz, 5H), 7.18 (ddd,  $J = 8.2, 7.1, 1.1$  Hz, 1H), 7.11 – 7.04 (m, 2H), 7.05 – 6.93 (m, 2H), 4.99 (d,  $J = 13.8$  Hz, 1H), 4.85 – 4.77 (m, 2H), 4.20 (ddd,  $J = 13.1, 7.8, 4.4$  Hz, 1H), 3.19 (dt,  $J = 13.8, 7.9$  Hz, 1H), 3.08 (dt,  $J = 13.2, 7.4$  Hz, 1H), 2.96 (dddd,  $J = 13.6, 7.1, 4.5, 0.9$  Hz, 1H);  $^{13}\text{C}$  NMR (101 MHz,  $\text{CDCl}_3$ )  $\delta$  166.7, 156.6, 153.0, 136.4, 135.2, 134.5, 129.8, 129.6, 129.2, 128.7, 128.2, 127.1, 126.9, 122.6, 122.3, 119.9, 118.4, 112.0, 111.6, 66.3, 47.1, 44.6, 23.0;  $m/z$  (ES HRMS)  $\text{C}_{27}\text{H}_{23}\text{N}_3\text{O}_3\text{Na}$  requires 460.1637, found  $[\text{MNa}]^+$  460.1635.

1-(2-(1H-indol-3-yl)ethyl)-4-benzyl-6-(3-oxobutyl)-6-phenylpiperazine-2,3,5-trione **8**

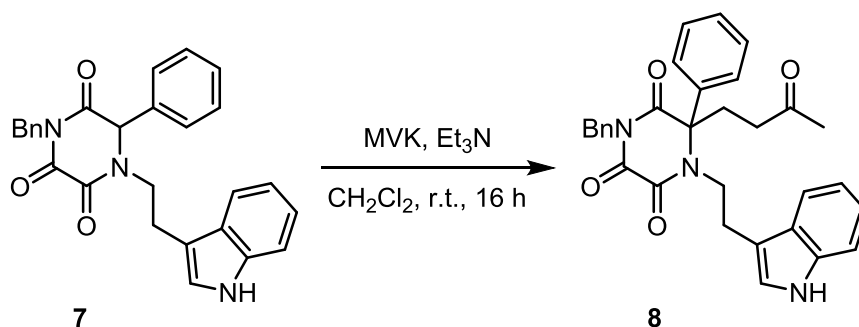

Following general procedure **Cii** using triketopiperazine **7** (66 mg, 0.15 mmol), triethylamine (20  $\mu$ L, 0.15 mmol),  $\text{CH}_2\text{Cl}_2$  (1.5 mL) and methyl vinyl ketone (30  $\mu$ L, 0.375 mmol). The reaction mixture was purified by flash column chromatography on silica gel (gradient: hexane:EtOAc = (4:1) to (1:1)) to afford **8** (75 mg, 99%) as a yellow oil.

**IR**  $\nu_{\text{max}}/\text{cm}^{-1}$  3339, 2950, 1741, 1712, 1677, 1419, 1362, 1227, 907, 726;  **$^1\text{H}$  NMR** (400 MHz,  $\text{CDCl}_3$ )  $\delta$  8.16 (br s, 1H), 7.47 (d,  $J = 7.9$  Hz, 1H), 7.42 – 7.36 (m, 5H), 7.35 – 7.28 (m, 6H), 7.15 (ddd,  $J = 8.2, 7.0, 1.2$  Hz, 1H), 7.07 (ddd,  $J = 8.0, 7.0, 1.0$  Hz, 1H), 6.89 (d,  $J = 2.4$  Hz, 1H), 5.20 (d,  $J = 13.5$  Hz, 1H), 4.98 (d,  $J = 13.5$  Hz, 1H), 3.49 (ddd,  $J = 13.5, 11.5, 4.7$  Hz, 1H), 3.16 (ddd,  $J = 13.4, 11.4, 5.6$  Hz, 1H), 3.01 – 2.75 (m, 3H), 2.61 (ddd,  $J = 14.3, 11.8, 3.6$  Hz, 1H), 2.23 (ddd,  $J = 17.7, 11.5, 3.6$  Hz, 1H), 2.04 (ddd,  $J = 17.3, 11.8, 5.1$  Hz, 1H), 1.96 (s, 3H);  **$^{13}\text{C}$  NMR** (101 MHz,  $\text{CDCl}_3$ )  $\delta$  205.4, 169.7, 156.0, 153.8, 138.0, 136.2, 135.3, 129.5, 128.8, 128.5, 127.0, 126.6, 122.4, 122.3, 119.7, 118.9, 112.1, 111.3, 71.7, 47.4, 44.7, 37.3, 30.1, 30.0, 23.3;  **$m/z$**  (ES HRMS)  $\text{C}_{31}\text{H}_{29}\text{N}_3\text{O}_4\text{Na}$  requires 530.2056, found  $[\text{MNa}]^+$  530.2057.

7-(2-(1H-indol-3-yl)ethyl)-2-benzyl-1-methyl-4-phenyl-2,7-diazabicyclo[2.2.1]heptan-3-one **9**

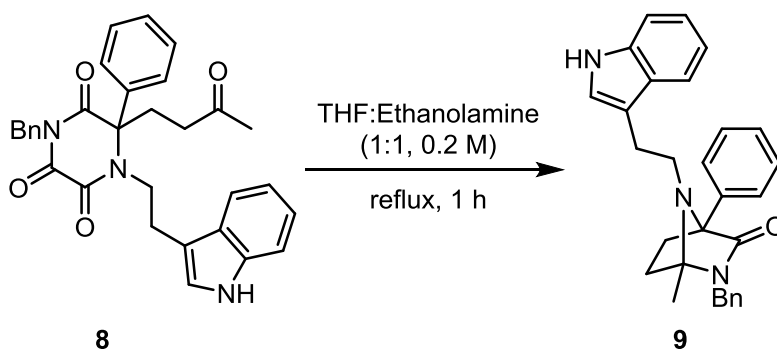

Following general procedure **D** using triketopiperazine **8** (54 mg, 0.11 mmol), THF (0.27 mL) and ethanolamine (0.27 mL). The reaction mixture was concentrated under reduced pressure and the residue was purified by flash column chromatography on silica gel (gradient: hexane:EtOAc = (4:1) to (1:1)) to afford **9** (24 mg, 52%) as a colourless oil.

**IR**  $\nu_{\text{max}}/\text{cm}^{-1}$  3408, 3298, 3057, 2923, 2852, 1685, 1494, 1455, 1318, 1182, 961, 908, 739;  **$^1\text{H}$  NMR** (400 MHz,  $\text{CDCl}_3$ )  $\delta$  7.99 – 7.94 (m, 2H), 7.86 (br s, 1H), 7.43 – 7.37 (m, 2H), 7.36 – 7.24 (m, 7H), 7.15 – 7.08 (m, 2H), 6.97 (ddd,  $J = 8.0, 6.9, 1.0$  Hz, 1H), 6.73 (d,  $J = 2.3$  Hz, 1H), 4.54 (d,  $J = 15.3$  Hz, 1H), 4.29 (d,  $J = 15.3$  Hz, 1H), 2.69 – 2.45 (m, 4H), 2.25 – 2.16 (m, 1H), 1.95 – 1.81 (m, 2H), 1.59 – 1.54 (m, 1H), 1.52 (s, 3H);  **$^{13}\text{C}$  NMR** (101 MHz,  $\text{CDCl}_3$ )  $\delta$  176.0, 138.5, 136.5, 136.2, 128.8, 128.5, 128.4, 128.2, 127.9, 127.5, 127.4, 122.0, 121.4, 119.3, 119.0, 114.4, 111.1, 83.9, 76.0, 44.0, 43.8, 35.1, 34.1, 27.1, 17.7;  **$m/z$**  (ES HRMS)  $\text{C}_{29}\text{H}_{30}\text{N}_3\text{O}$  requires 436.2389, found  $[\text{MH}]^+$  436.2392.

*N*-benzyl-11b-methyl-3-phenyl-2,3,5,6,11,11b-hexahydro-1H-indolizino[8,7-b]indole-3-carboxamide **10**

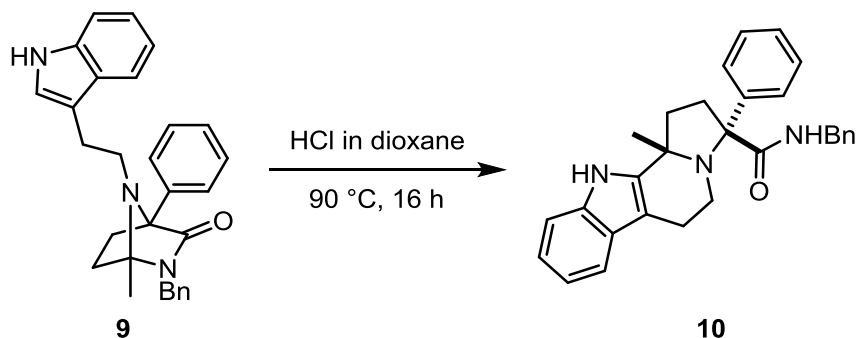

To a round bottomed flask containing **9** (16 mg, 38  $\mu$ mol) was added HCl in dioxane (0.5 ml) and the reaction mixture was heated at 90 °C for 16 hours. The reaction mixture was concentrated under reduced pressure and the resulting residue was taken up in CH<sub>2</sub>Cl<sub>2</sub> (3 mL), washed with sat. aq. NaHCO<sub>3</sub> (5 mL), the aqueous layer was extracted with CH<sub>2</sub>Cl<sub>2</sub> (2 x 3 mL), the organic layers were combined and washed with brine (5 mL), dried over MgSO<sub>4</sub> and concentrated under reduced pressure. The residue was purified by flash column chromatography on silica gel (gradient: hexane:EtOAc = (4:1) to (1:1)) to afford **10** (10.4 mg, 63%) as a pale yellow oil.

**IR**  $\nu_{\text{max}}$ /cm<sup>-1</sup> 3284, 2960, 2922, 2852, 1651, 1499, 1449, 1331, 1275, 1117, 908, 732; **<sup>1</sup>H NMR** (400 MHz, CDCl<sub>3</sub>)  $\delta$  8.80 (t,  $J$  = 6.0 Hz, 1H), 7.81 (br s, 1H), 7.41 (d,  $J$  = 4.3 Hz, 4H), 7.36 – 7.23 (m, 7H), 7.14 (ddd,  $J$  = 8.1, 7.0, 1.2 Hz, 1H), 7.05 (ddd,  $J$  = 8.0, 7.0, 1.0 Hz, 1H), 4.70 (dd,  $J$  = 14.7, 6.6 Hz, 1H), 4.54 (dd,  $J$  = 14.7, 5.3 Hz, 1H), 3.17 (dd,  $J$  = 8.4, 2.8 Hz, 2H), 2.56 – 2.39 (m, 2H), 2.29 (ddd,  $J$  = 12.4, 6.1, 2.2 Hz, 1H), 1.99 – 1.89 (m, 2H), 1.68 – 1.55 (m, 2H), 1.48 (s, 3H); **<sup>13</sup>C NMR** (101 MHz, CDCl<sub>3</sub>)  $\delta$  177.0, 139.1, 139.0, 137.8, 135.7, 129.1, 128.9, 128.2, 128.1, 128.0, 127.7, 127.5, 121.9, 119.4, 118.3, 110.9, 109.9, 76.6, 62.5, 44.0, 39.9, 37.4, 33.6, 28.4, 19.4; ***m/z*** (ES HRMS) C<sub>29</sub>H<sub>30</sub>N<sub>3</sub>O requires 436.2389, found [MH]<sup>+</sup> 436.2388.

## References

- 1 F. Wu, H. Li, R. Hong and L. Deng, *Angew. Chemie Int. Ed.*, 2006, **45**, 947–950.
- 2 H. Li, Y. Wang, L. Tang and L. Deng, *J. Am. Chem. Soc.*, 2004, **126**, 9906–9907.
- 3 A. Cabanillas, C. D. Davies, L. Male and N. S. Simpkins, *Chem. Sci.*, 2015, **6**, 1350–1354.
- 4 A. R. Katritzky, J. R. Levell and D. P. M. Pleyne, *Synthesis (Stuttg.)*, 1998, **1998**, 153–156.
- 5 S. Chanthamath, S. Takaki, K. Shibatomi and S. Iwasa, *Angew. Chemie Int. Ed.*, 2013, **52**, 5818–5821.
- 6 D. Koszelewski, M. Cwiklak and R. Ostaszewski, *Tetrahedron Asymmetry*, 2012, **23**, 1256–1261.



## Appendix

### $^1\text{H}$ and $^{13}\text{C}$ NMR

06-02-Simpkins-60.10.fid  
GP121 F7-15

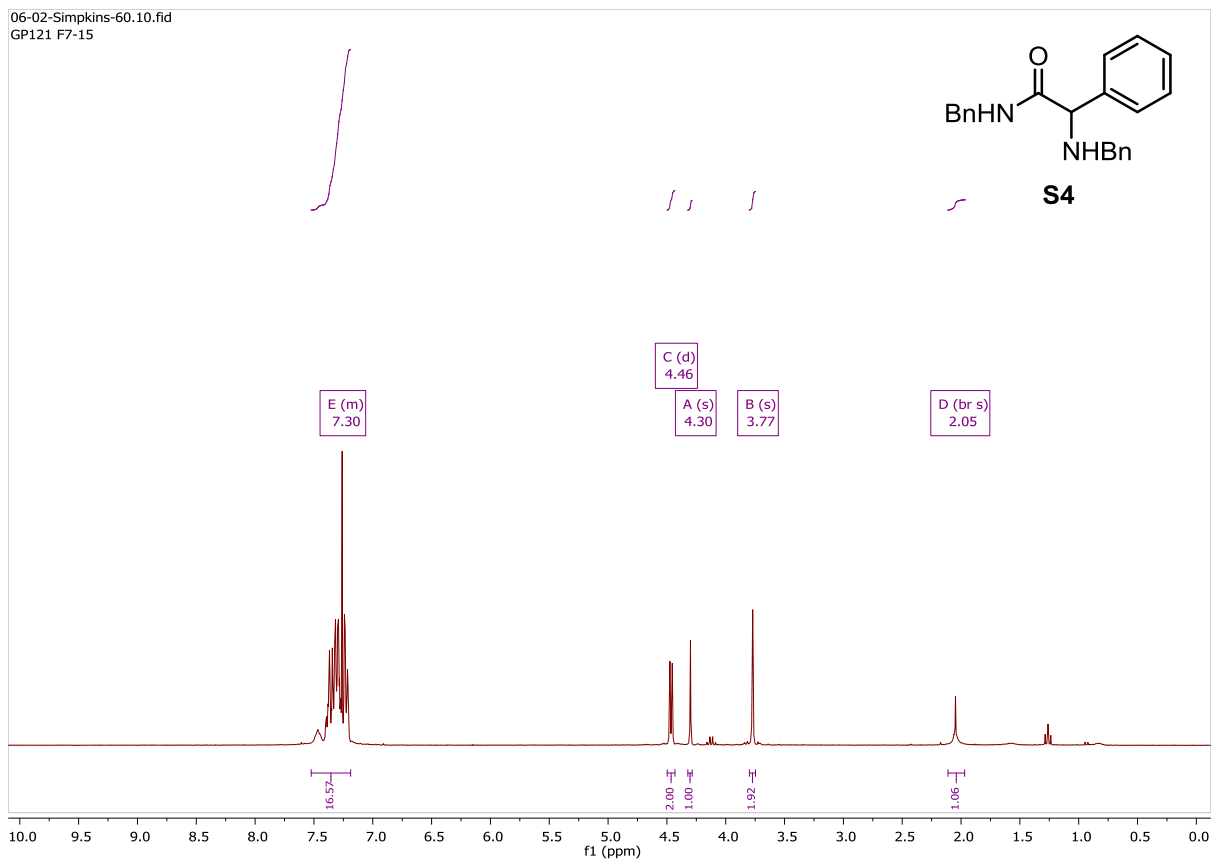

06-01-Simpkins-9.10.fid  
GP119-1 F13-17

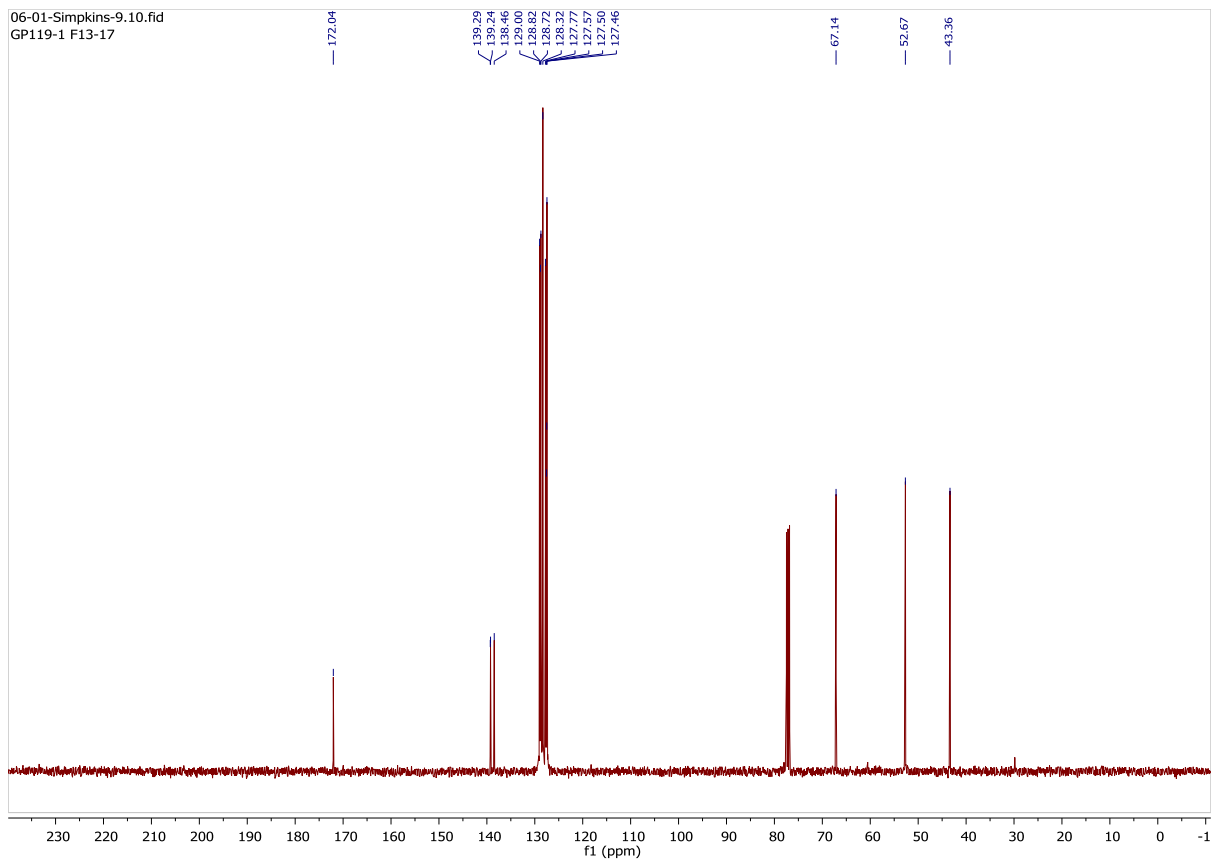

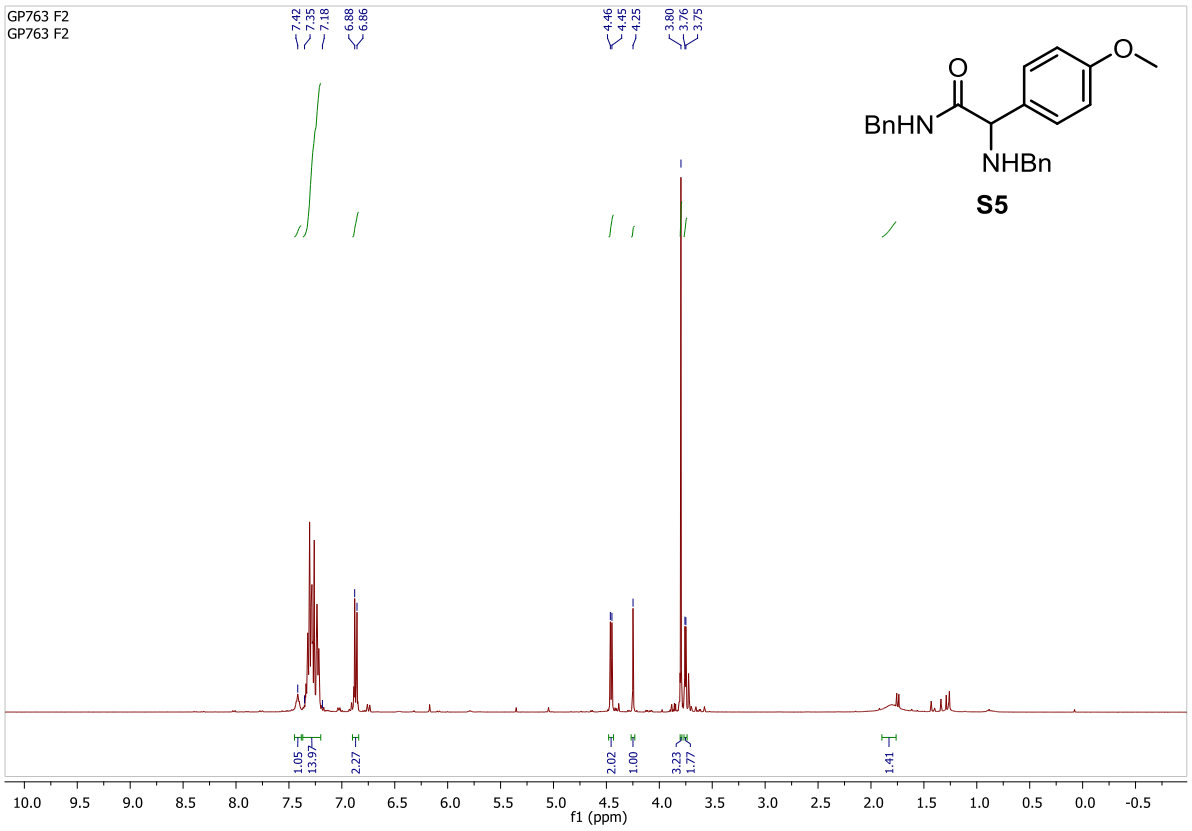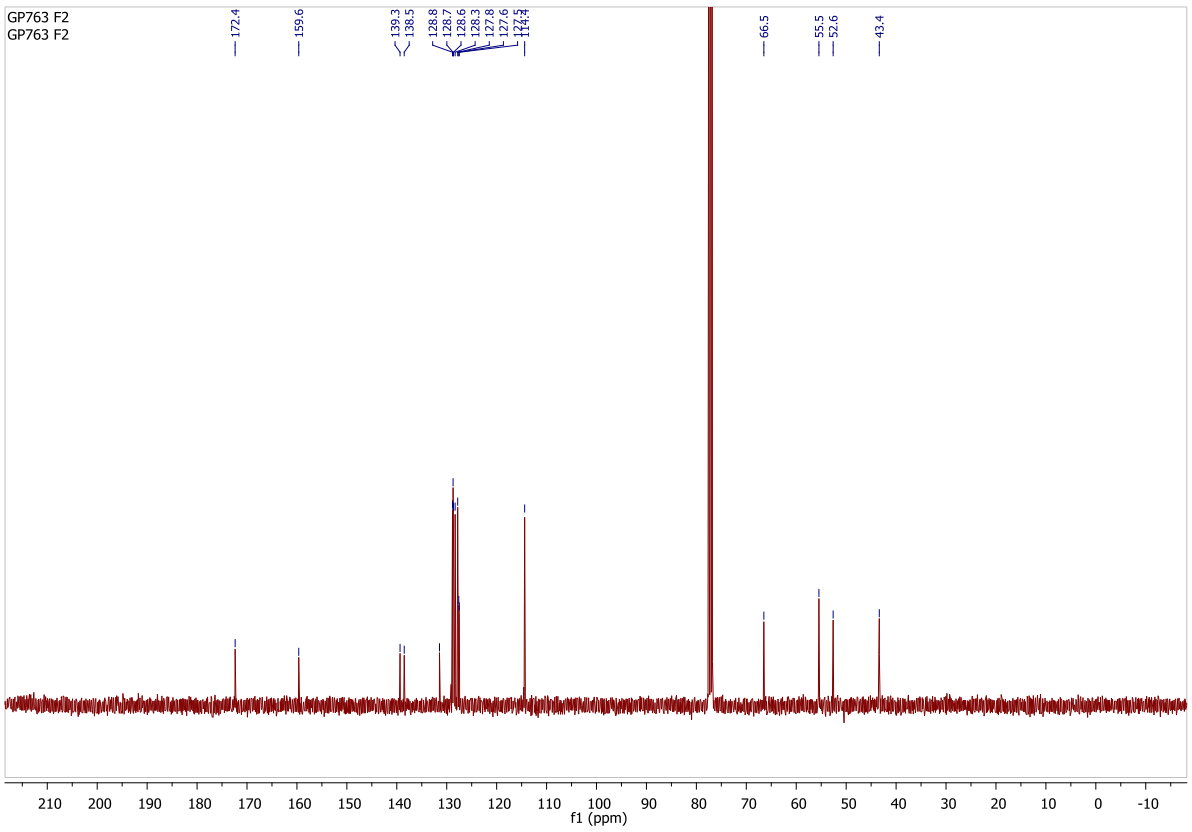

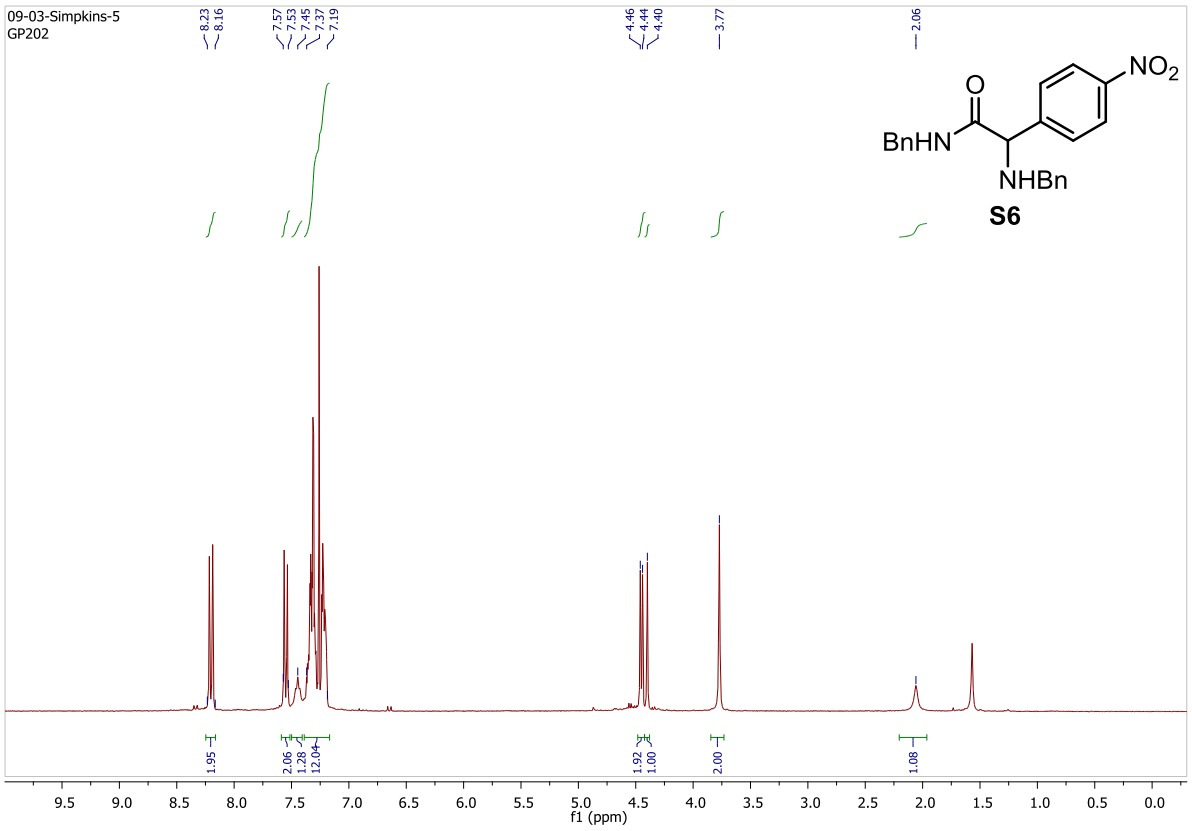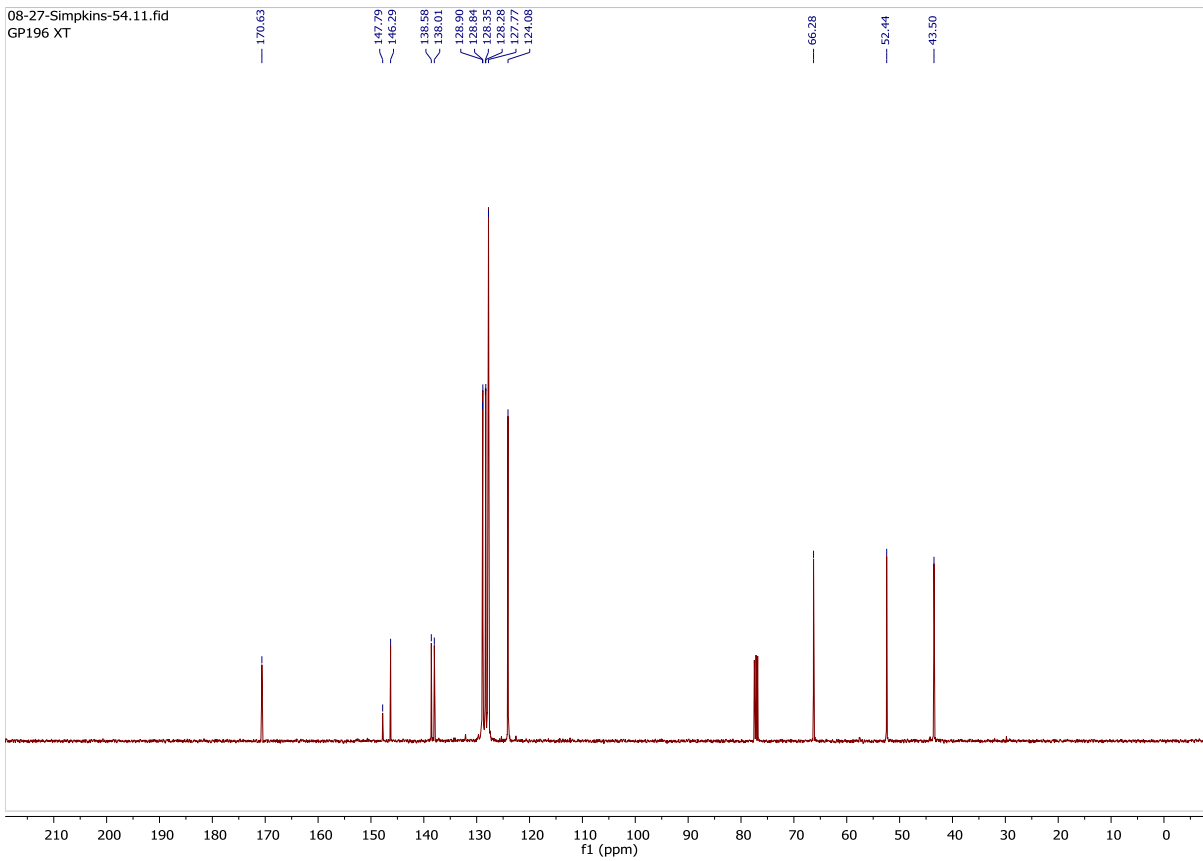

GP530 F1.10.fid  
GP530 F1

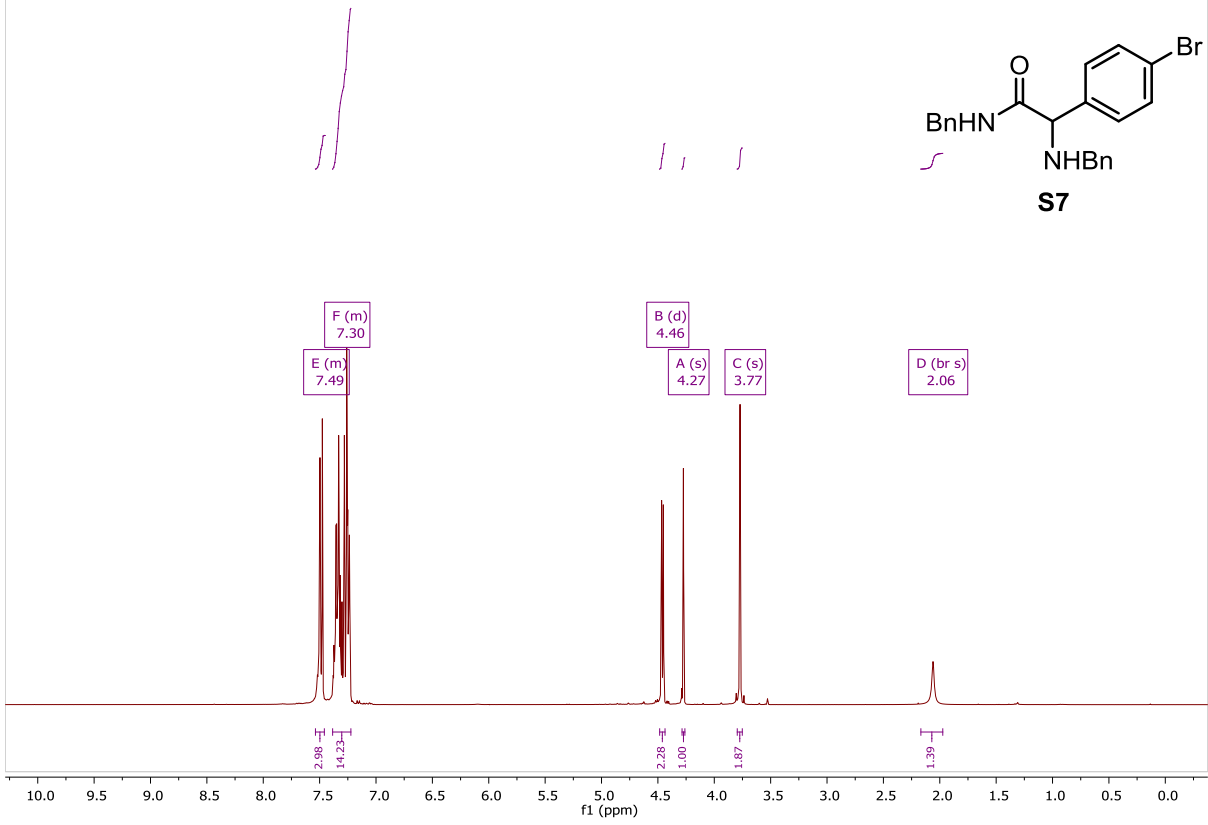

GP530 F1.12.fid  
GP530 F1

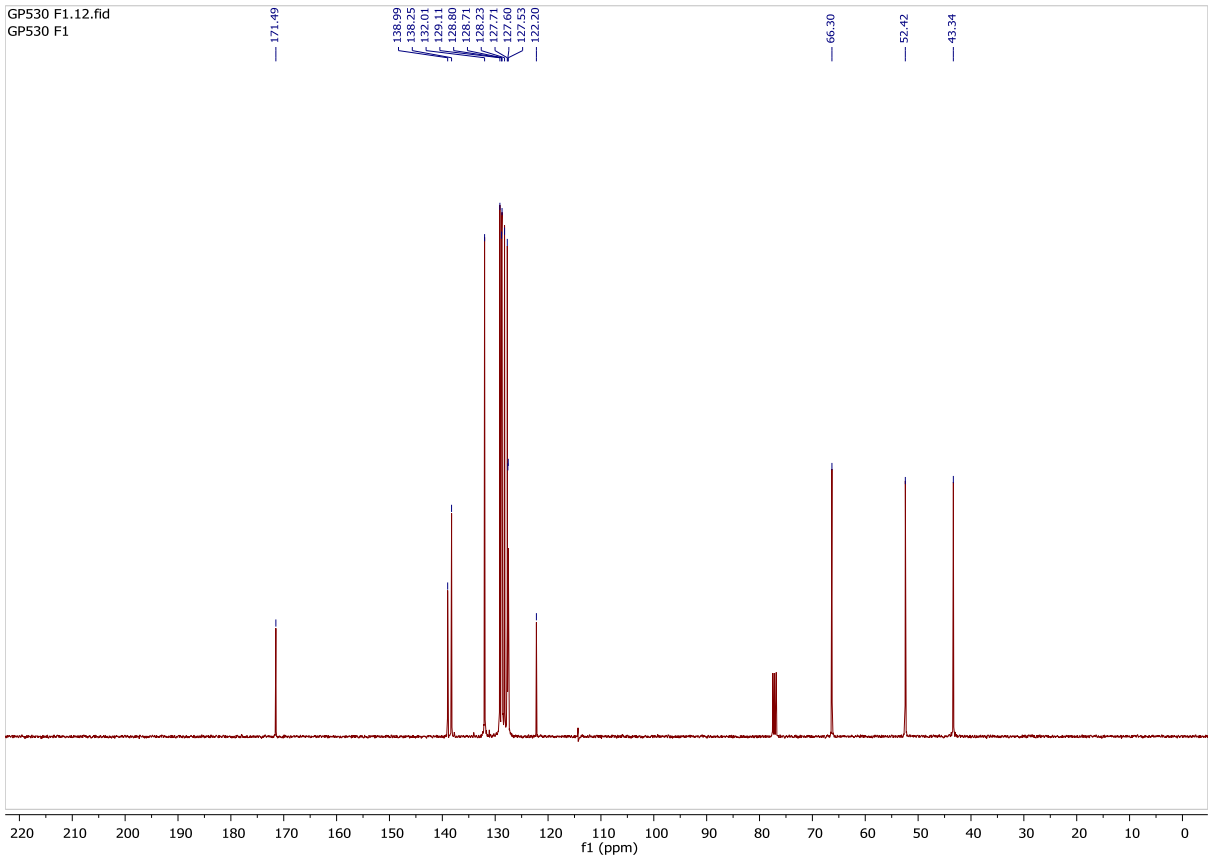

GP738 F1.1.fid  
GP738 F1

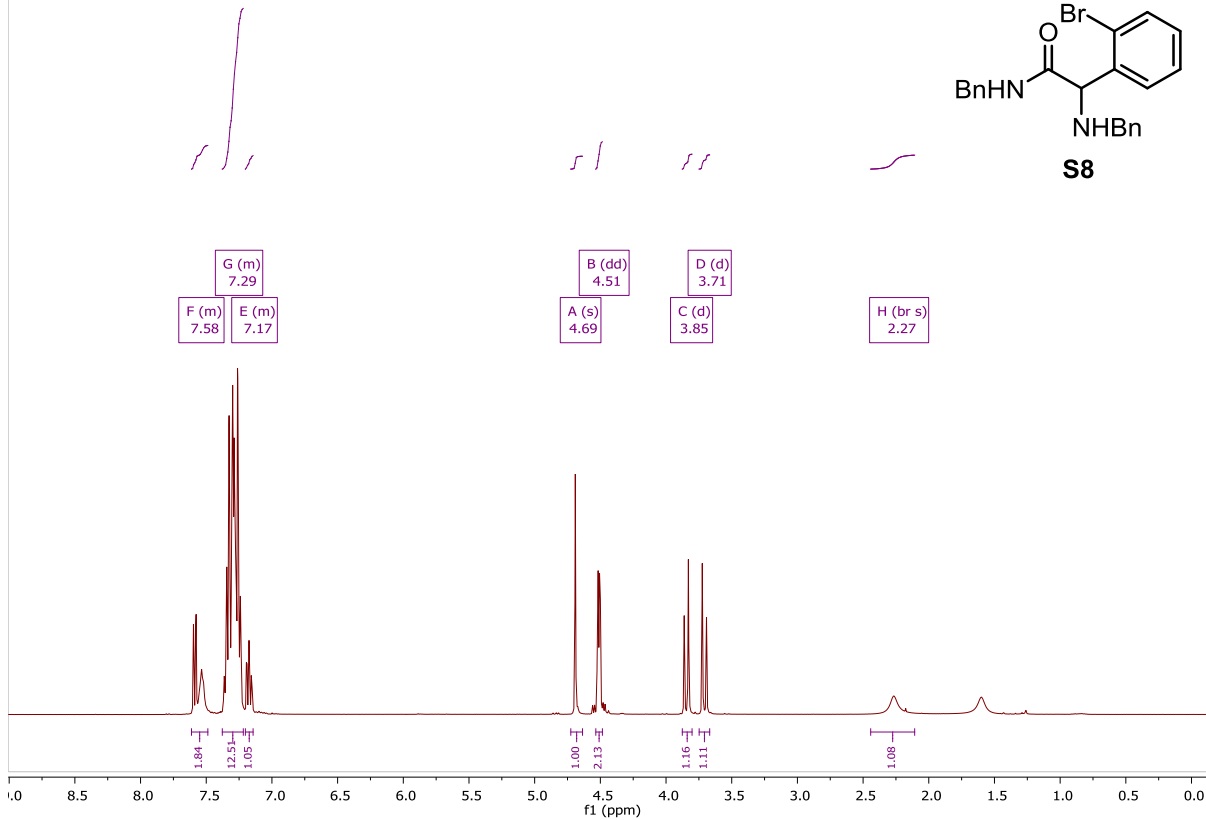

GP738 F1.2.fid  
GP738 F1

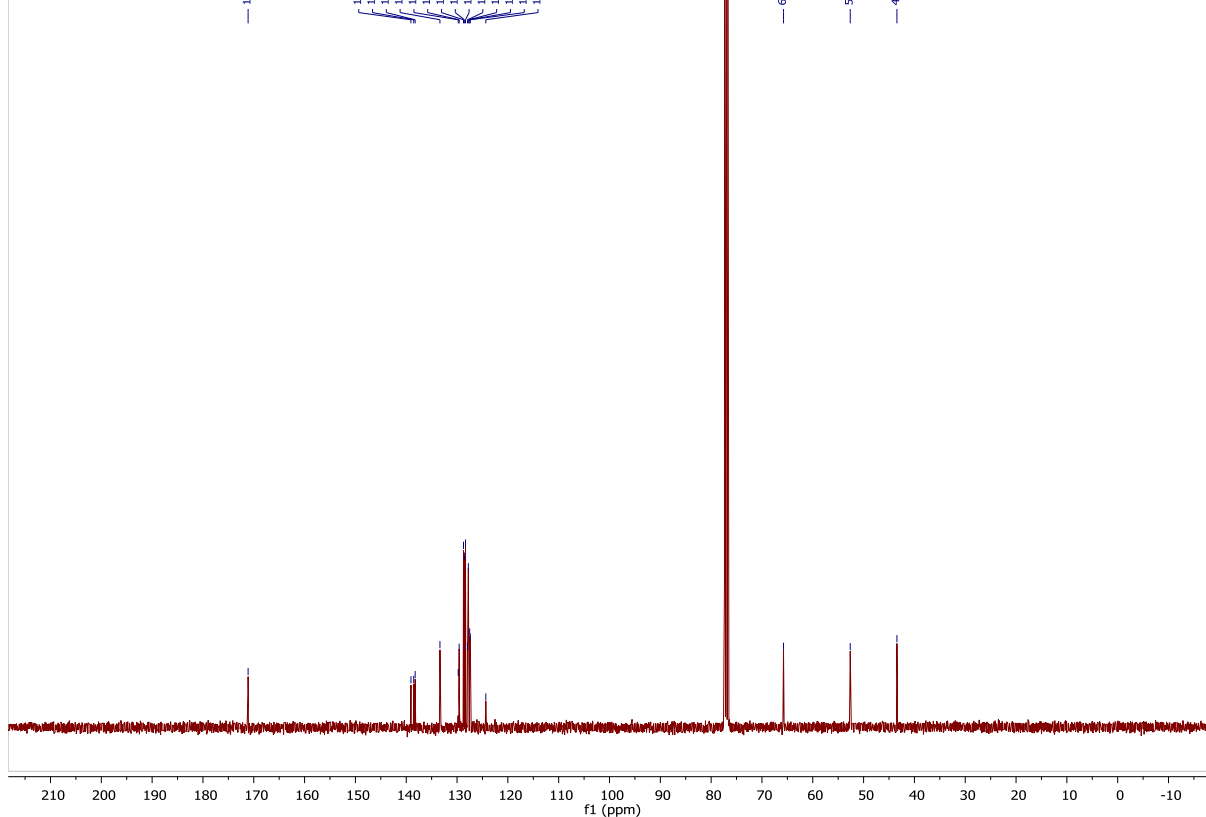

GP537 F1.10.fid  
GP537 F1

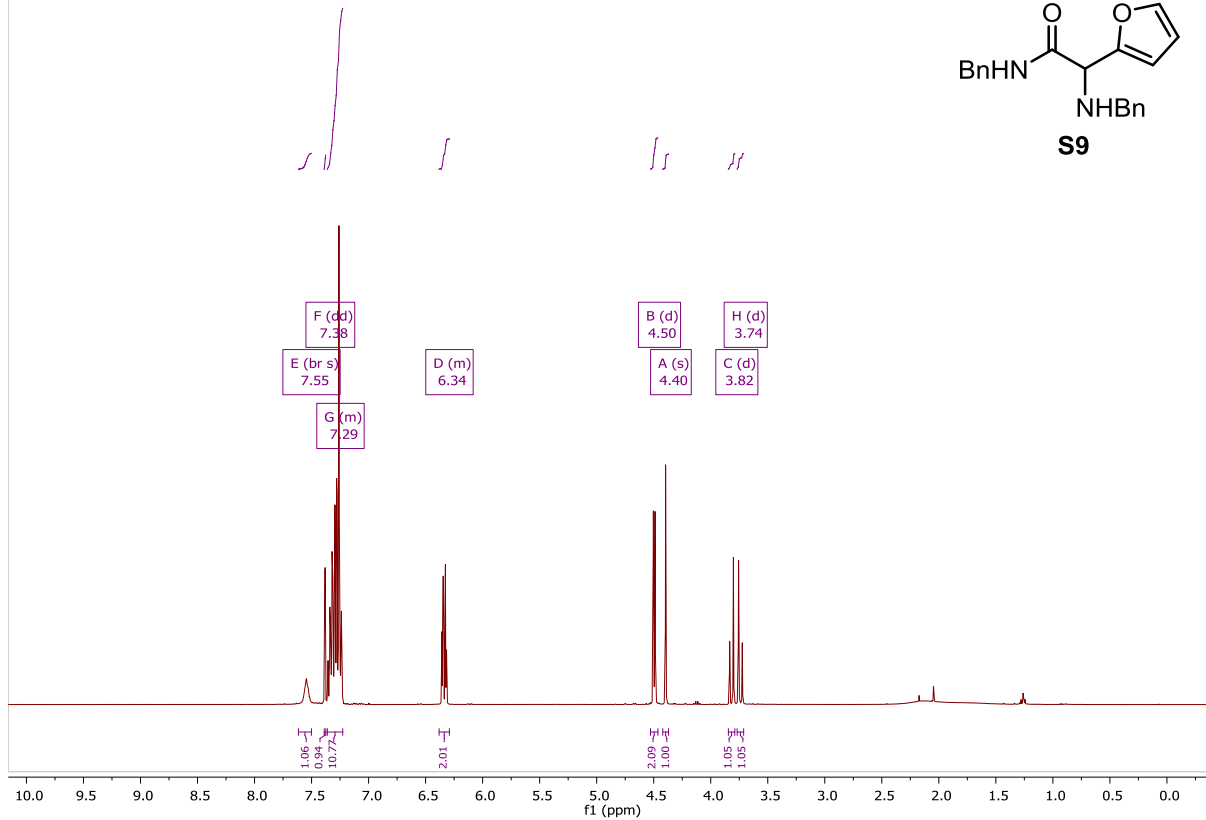

GP537 F1.12.fid  
GP537 F1

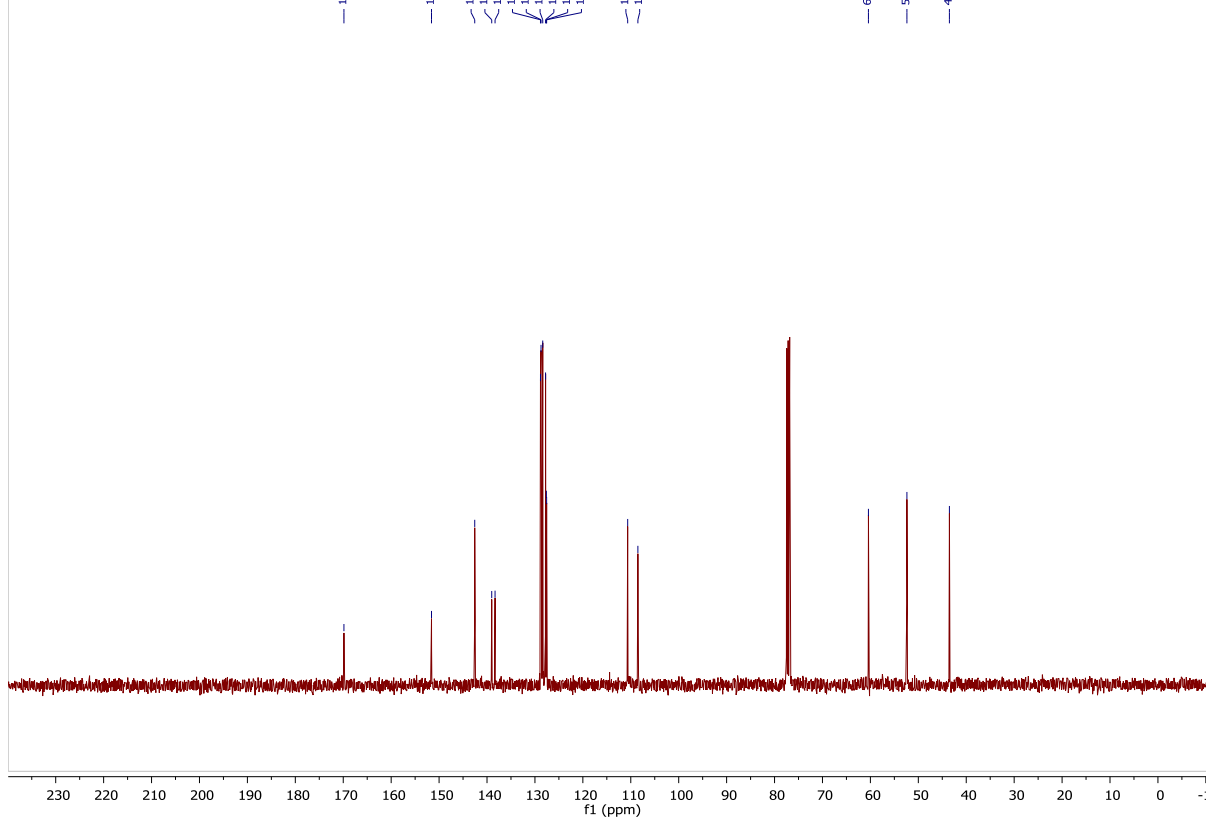

GP519 F1.10.fid  
GP519 F1

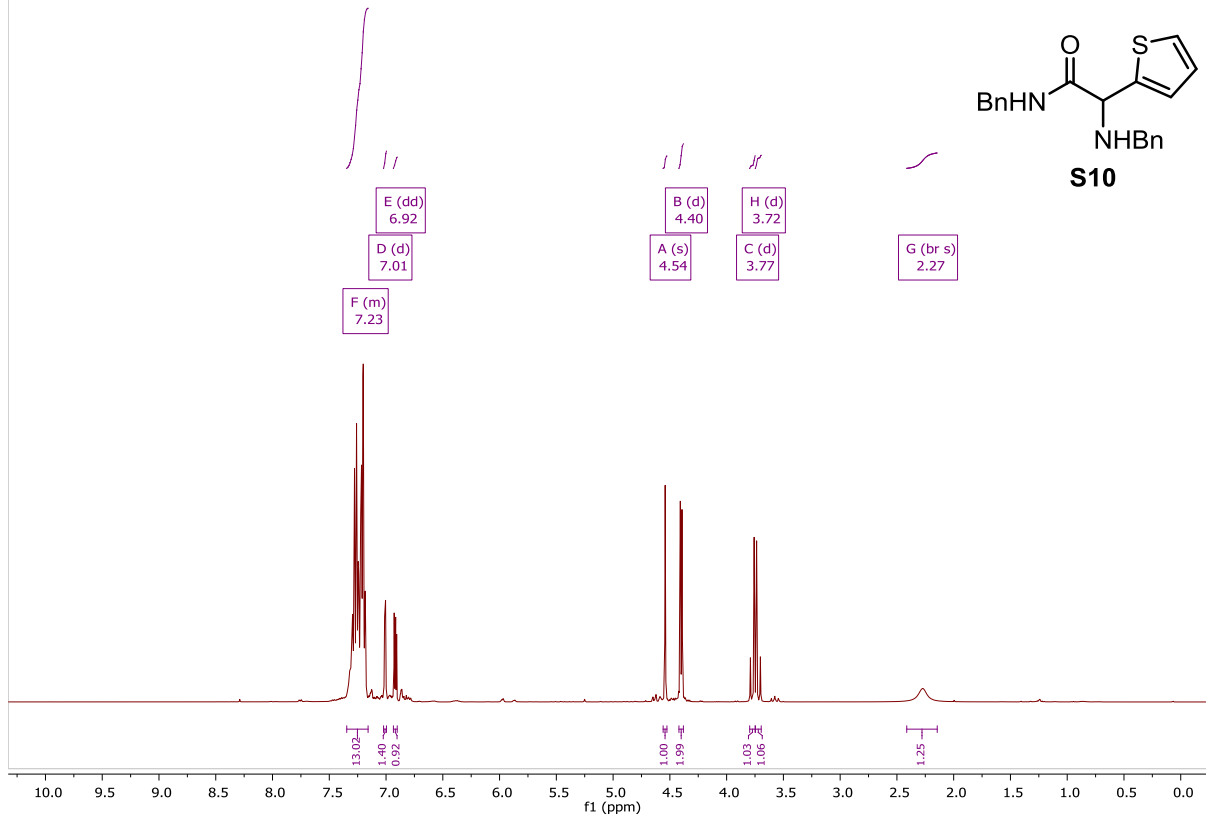

GP519 F1.12.fid  
GP519 F1

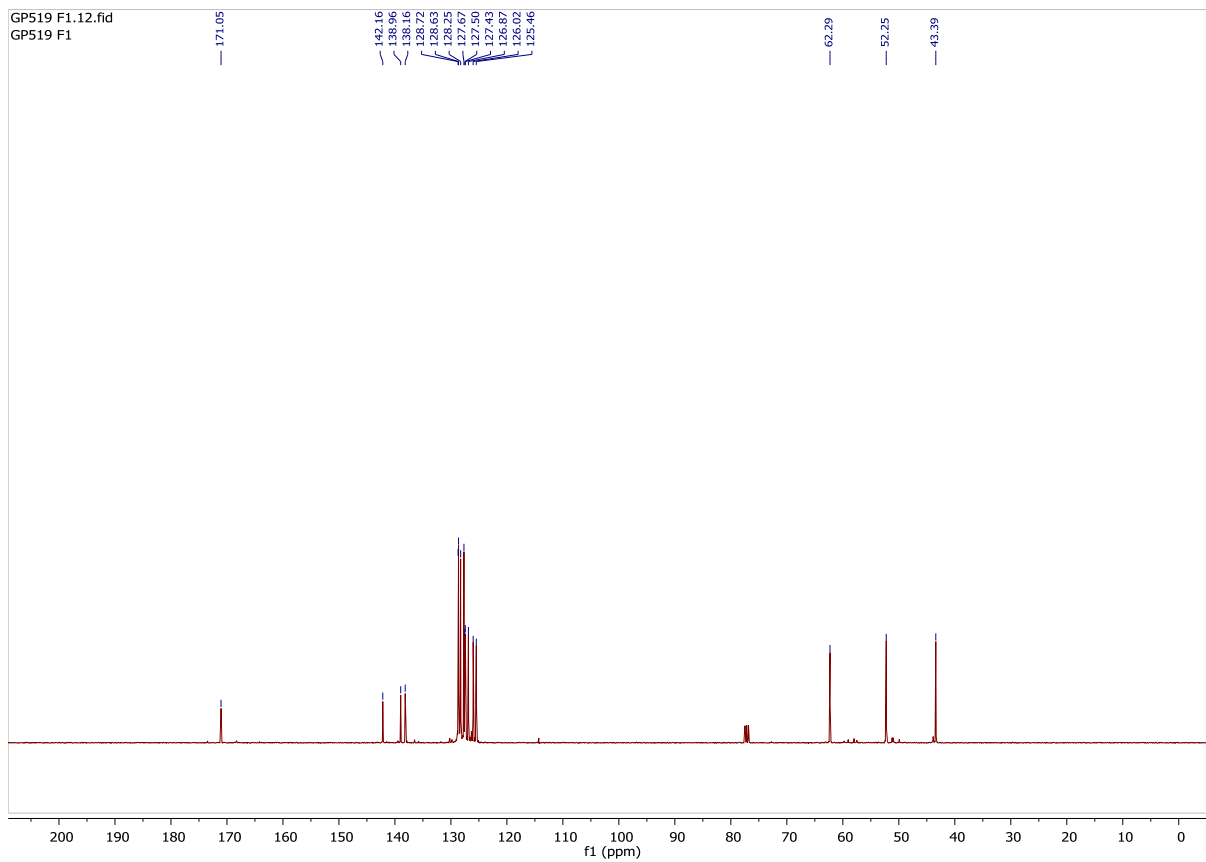



06-03-Simpkins-7.10.fid  
GP123 F13-25

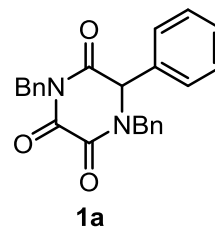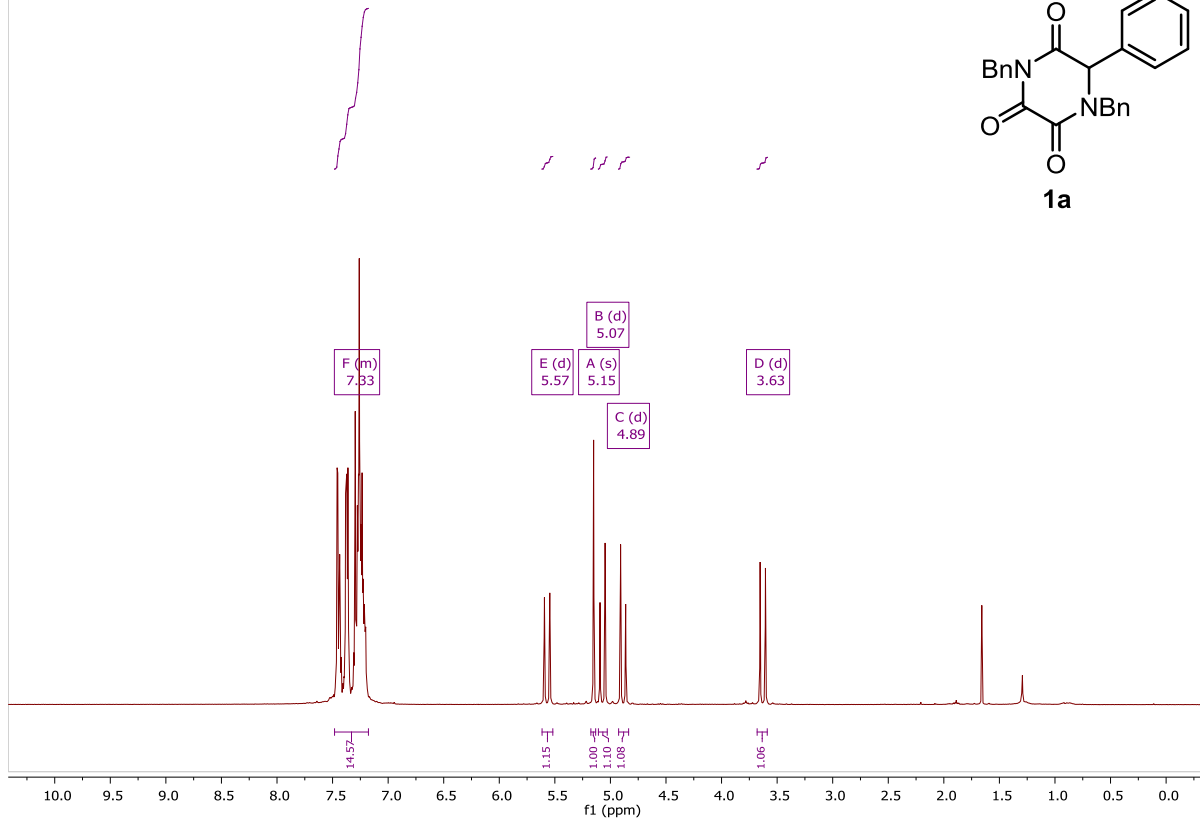

07-02-Simpkins-14  
GP TKPPH

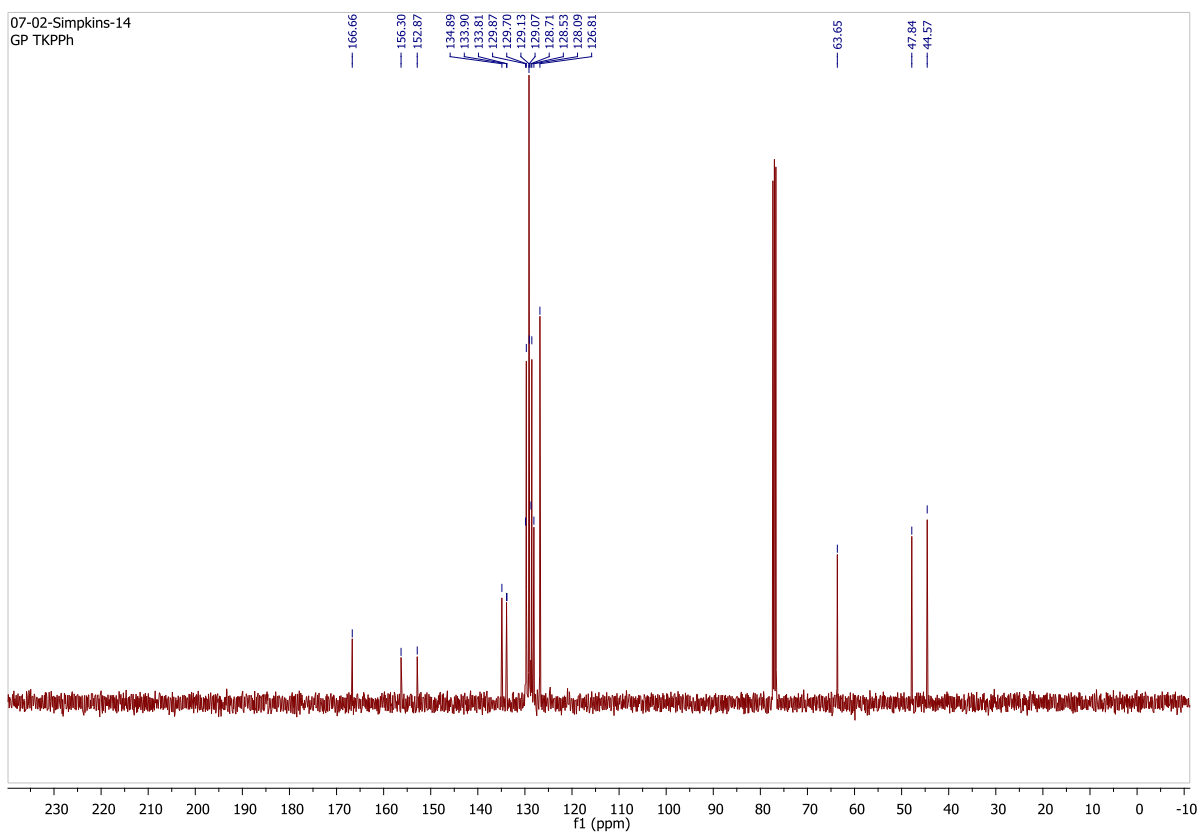

12-16-Simpkins-38.10.fid  
GP279 MeOH recryst

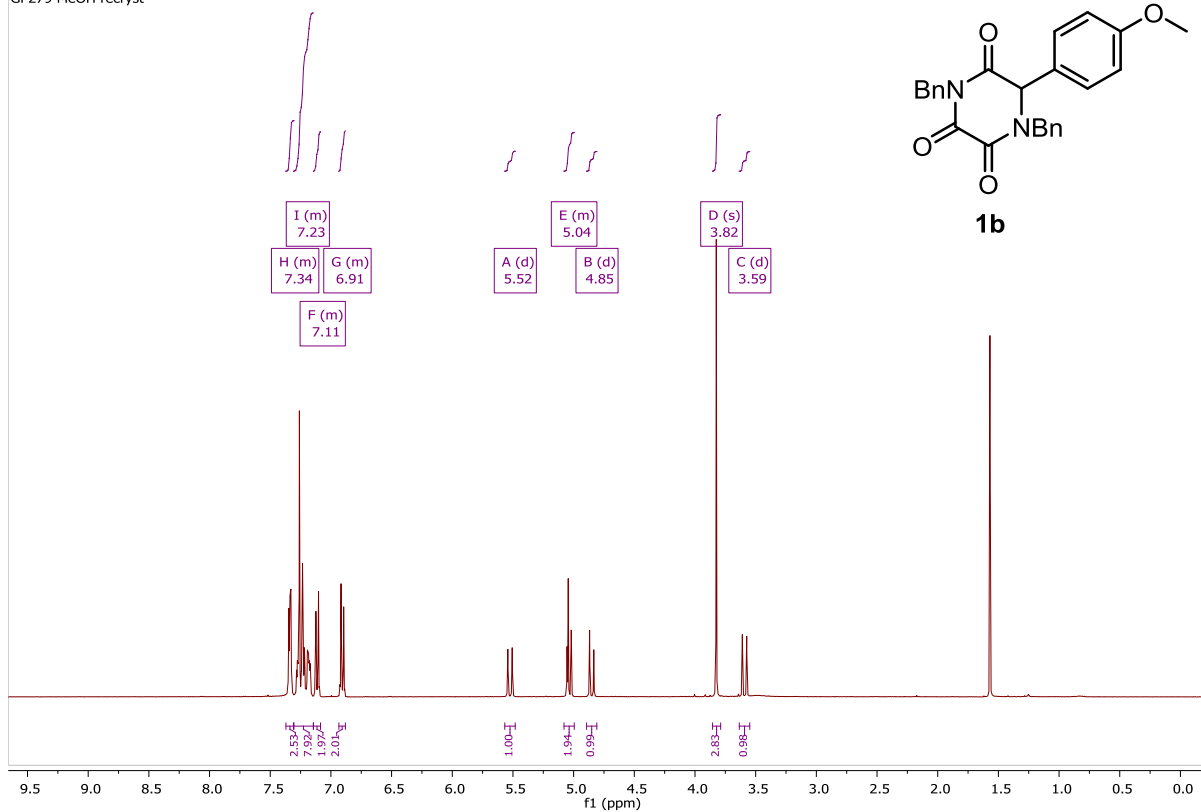

12-16-Simpkins-38.21.fid  
GP279 MeOH recryst

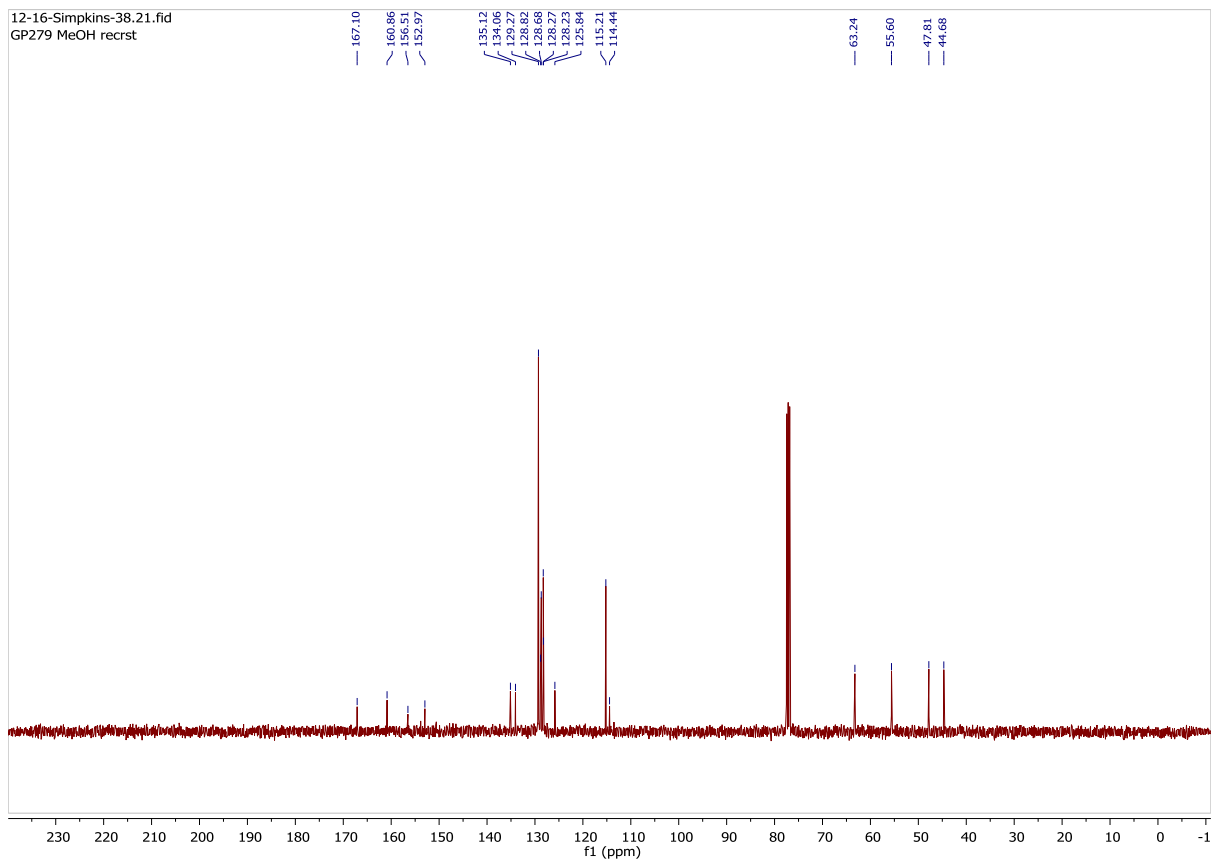

09-08-Simpkins-14.10.fid  
GP205

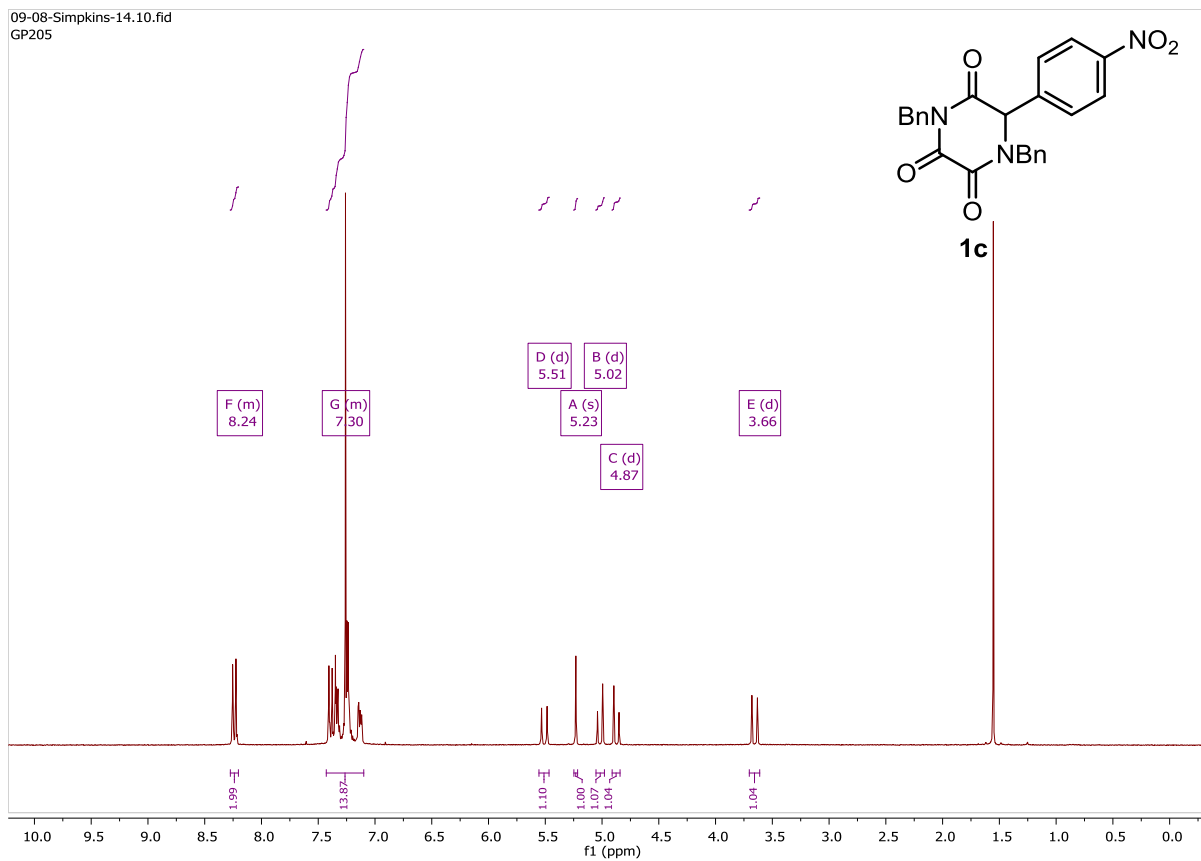

09-09-Simpkins-24.11.fid  
GP205

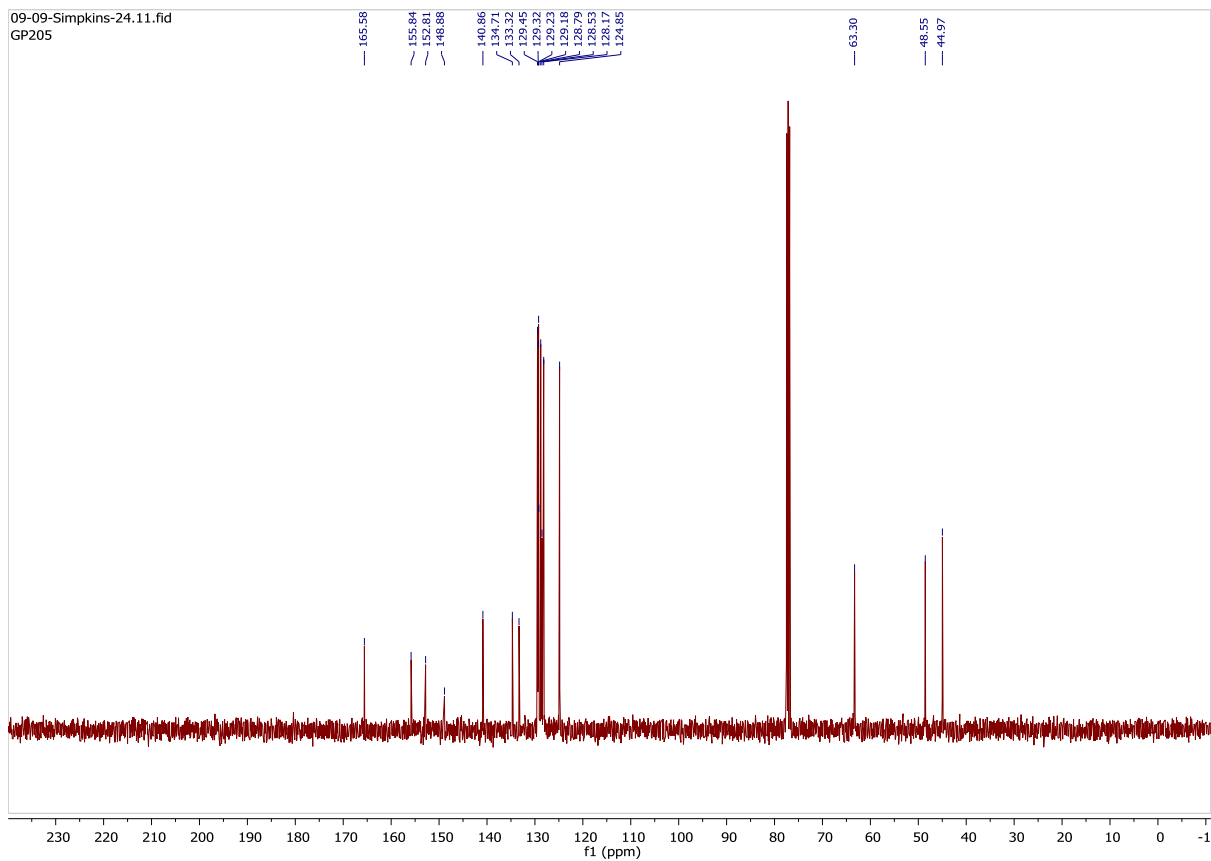

GP453.12.fid  
GP453

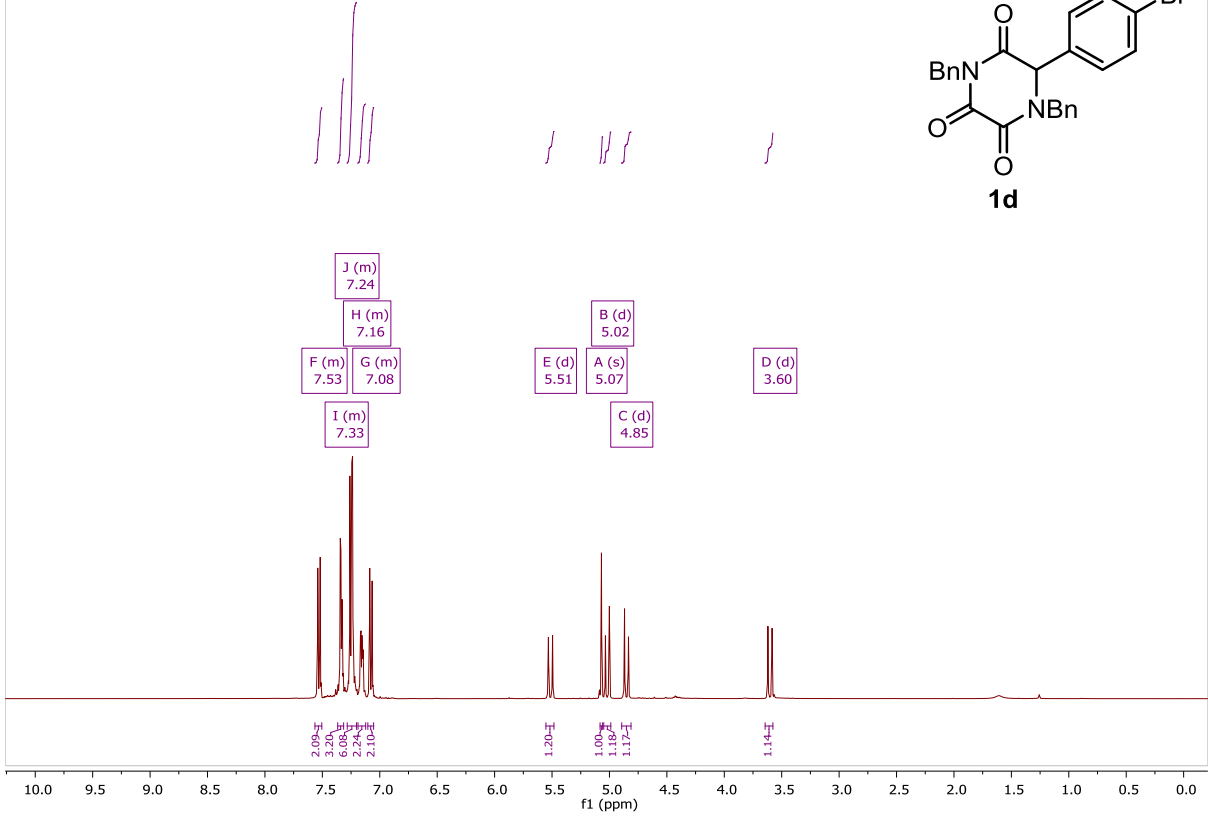

GP453.11.fid  
GP453

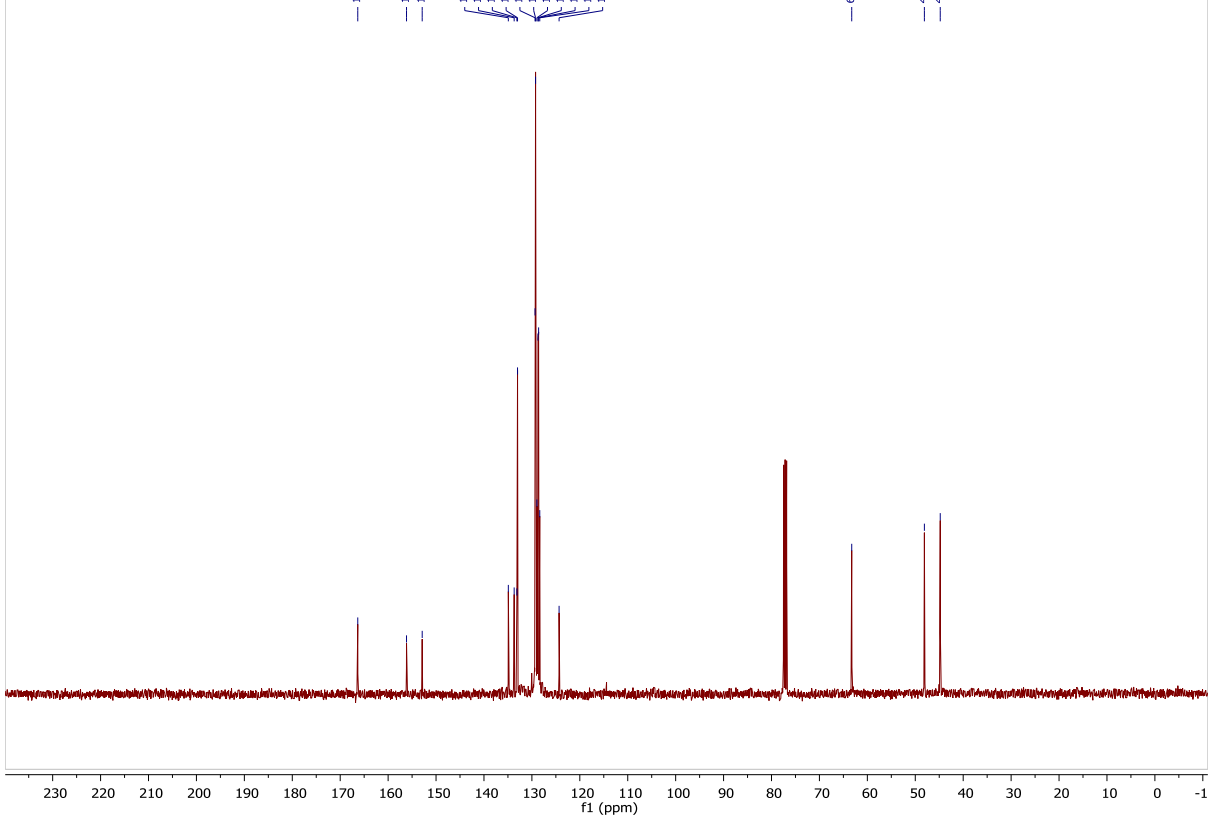

GP540 F1.10.fid  
GP540 F1

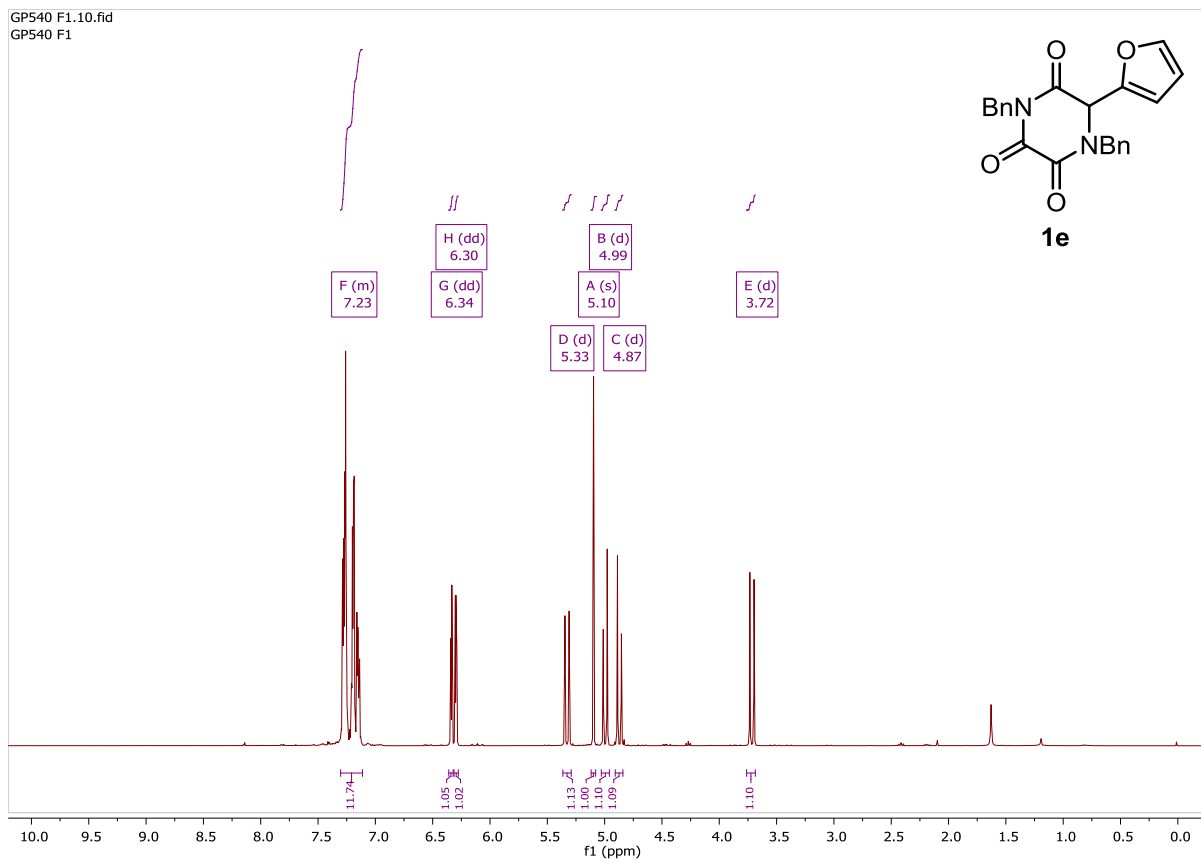

GP540 F1.12.fid  
GP540 F1

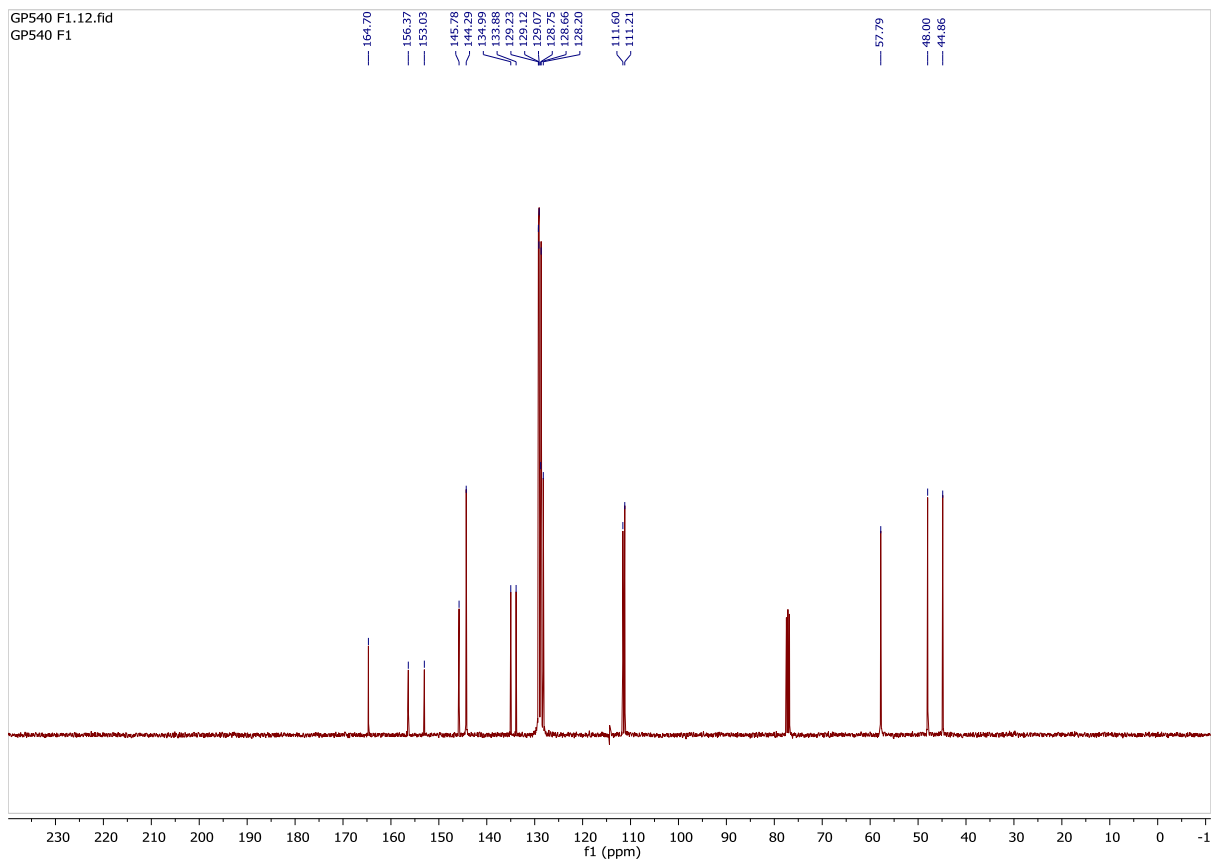

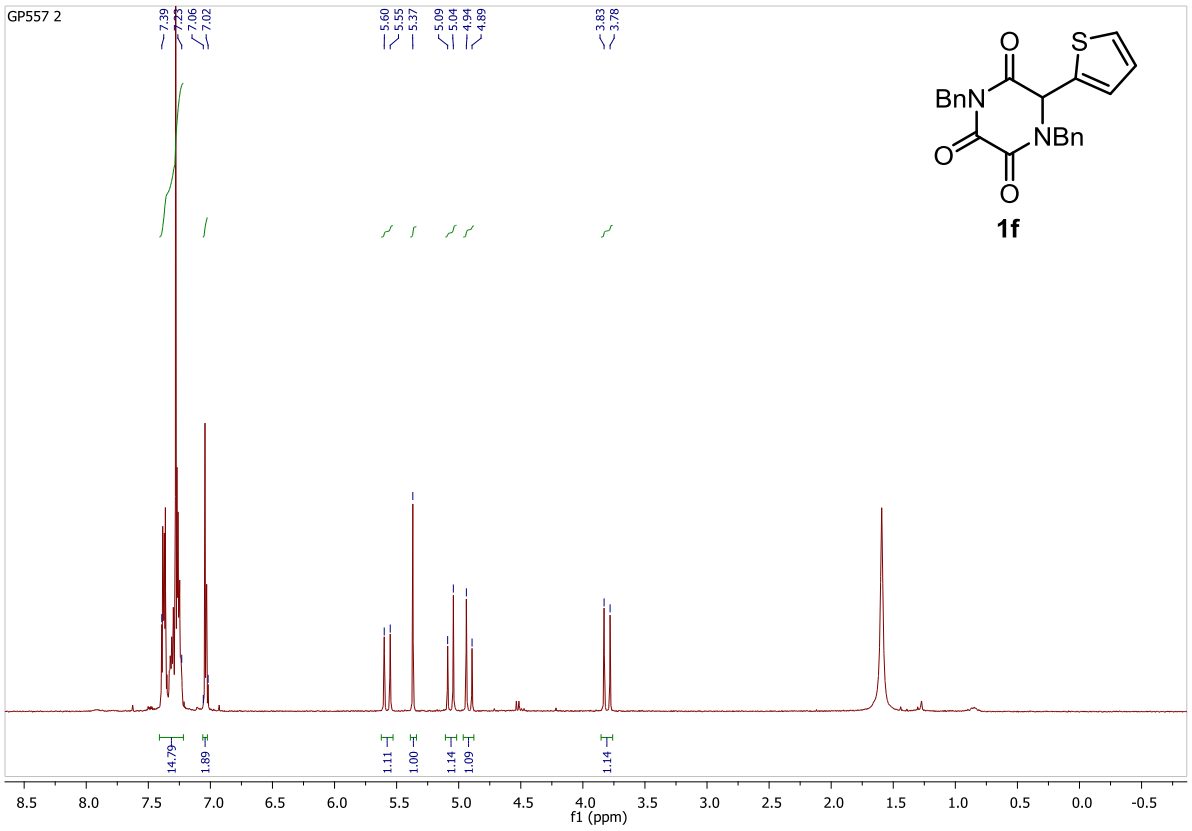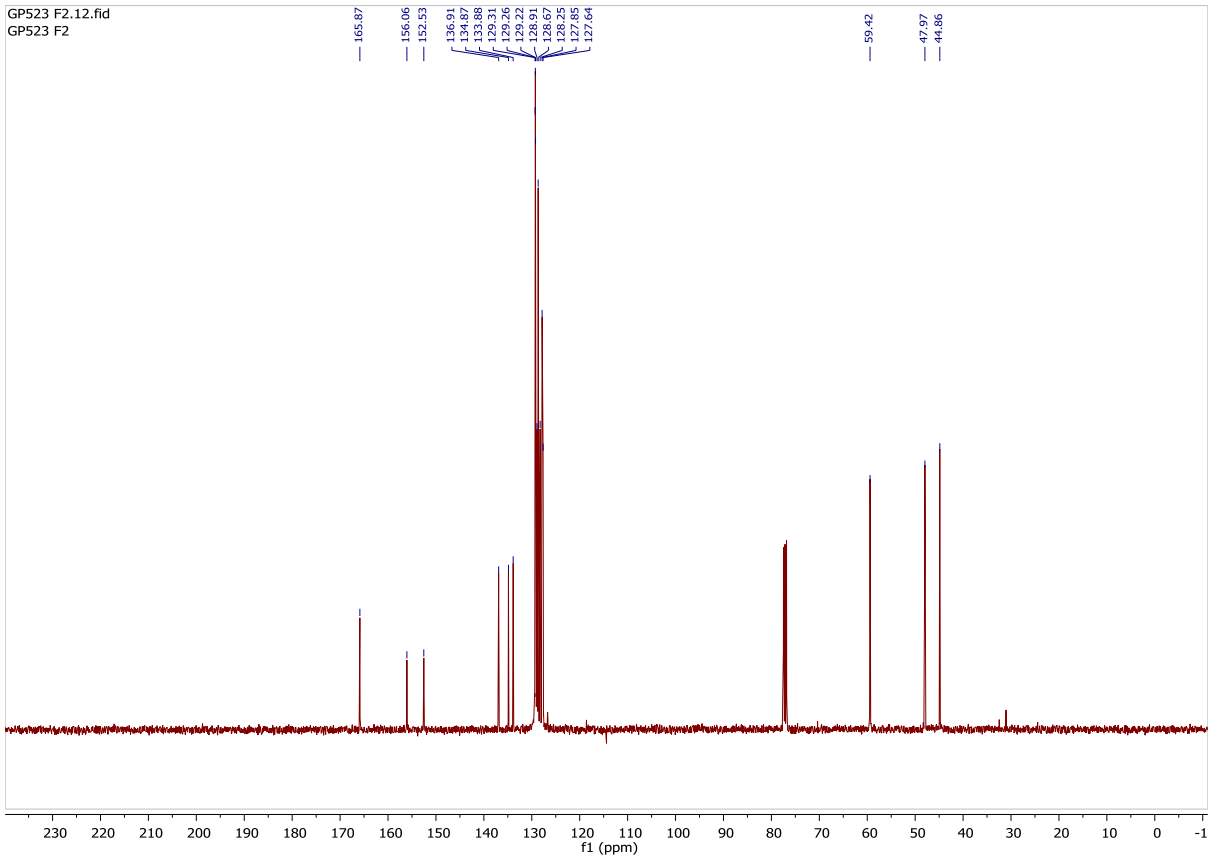

GP539 F1.10.fid  
GP539 F1

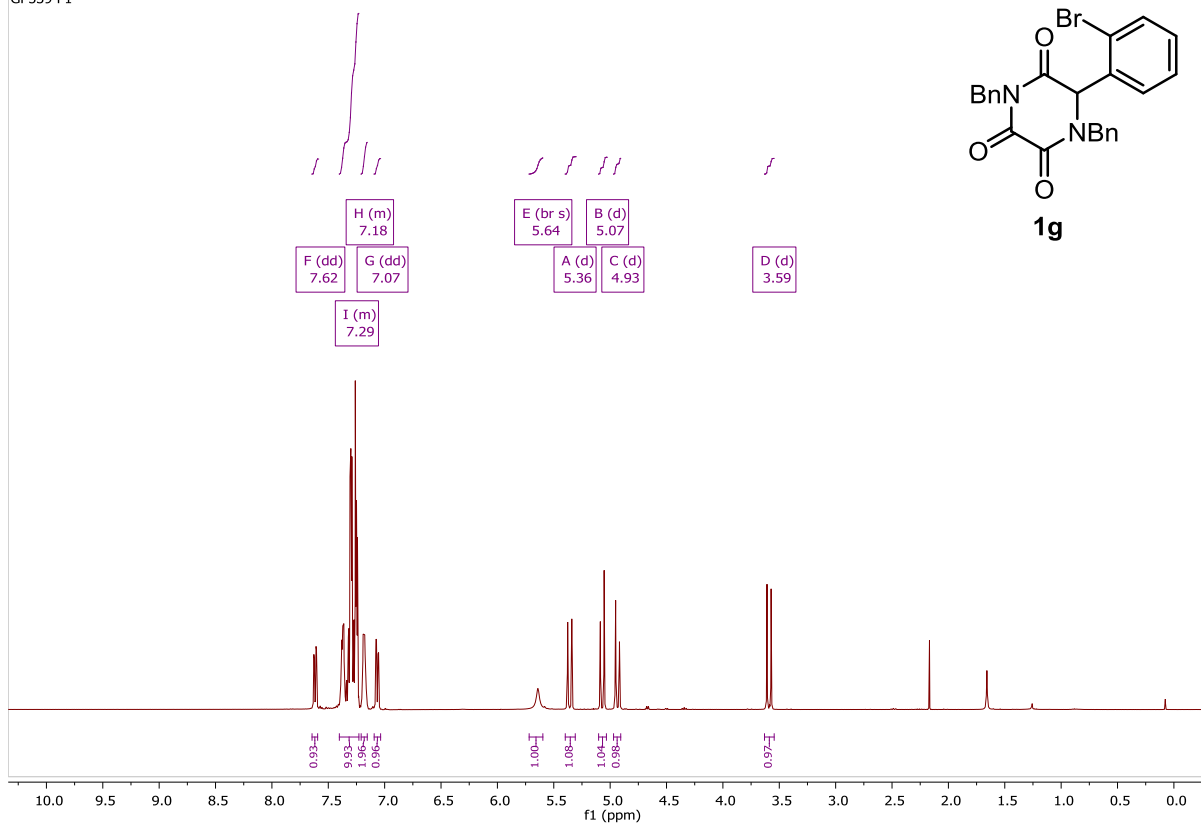

GP539 F1.12.fid  
GP539 F1

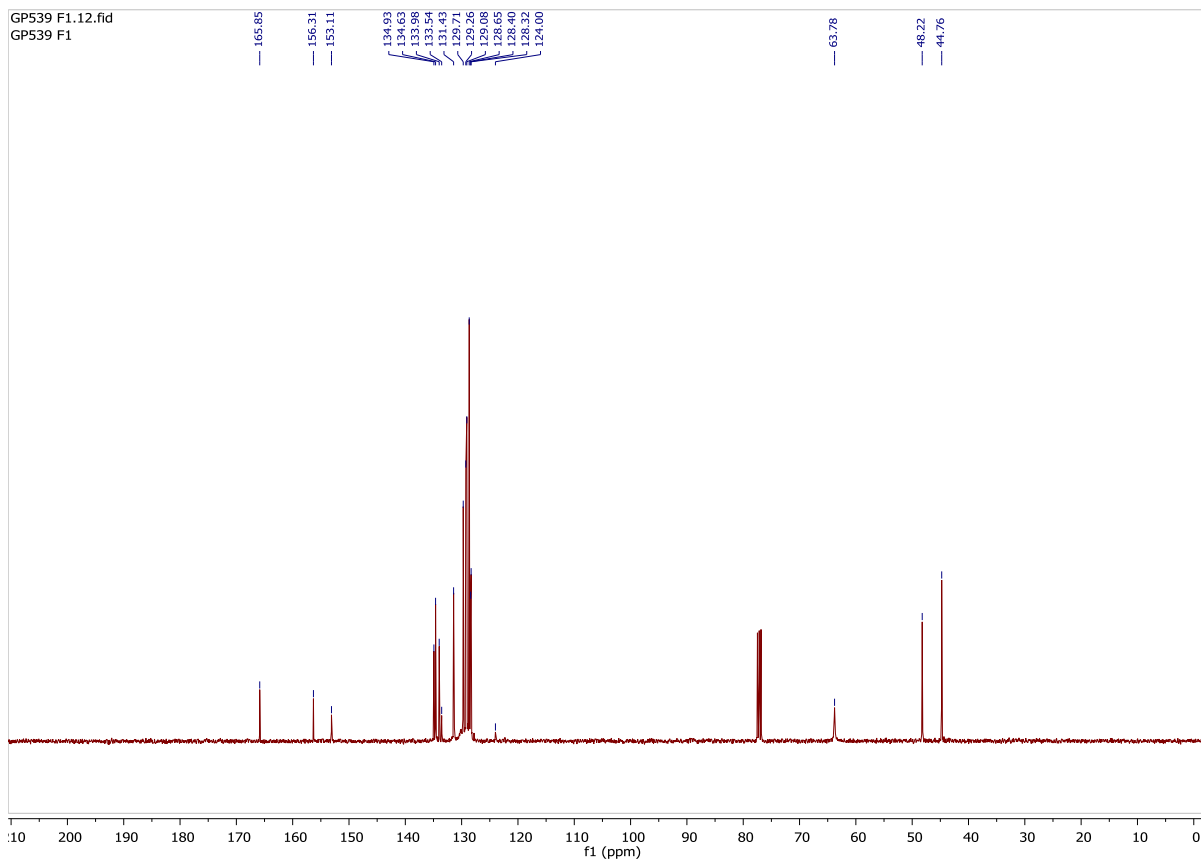

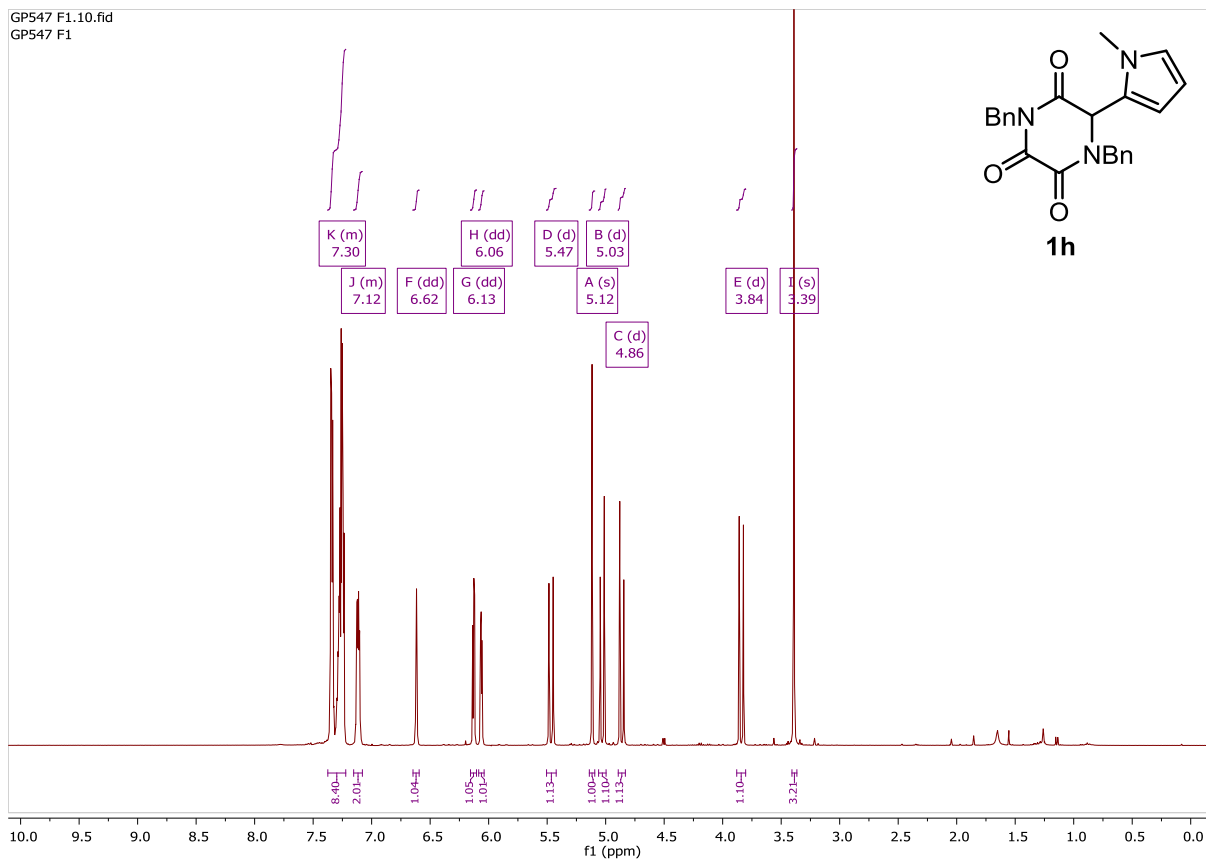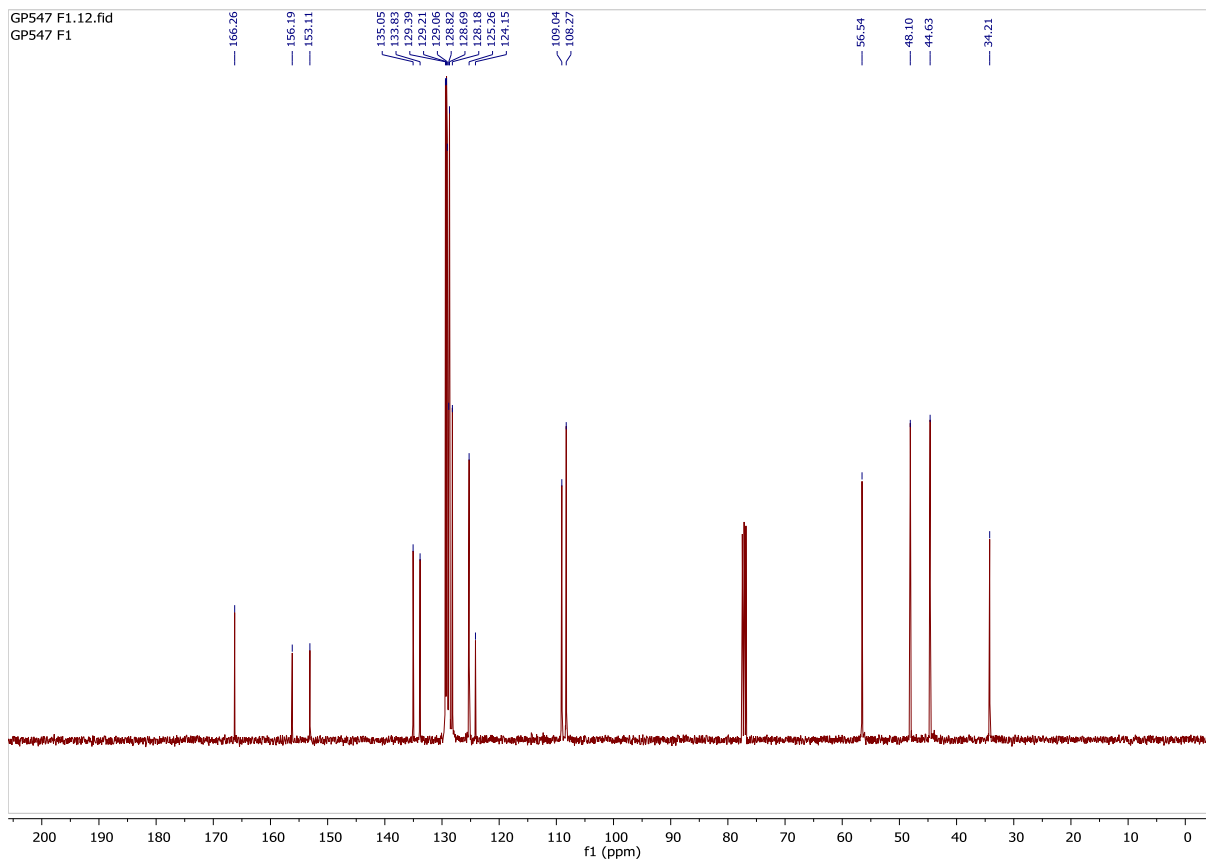



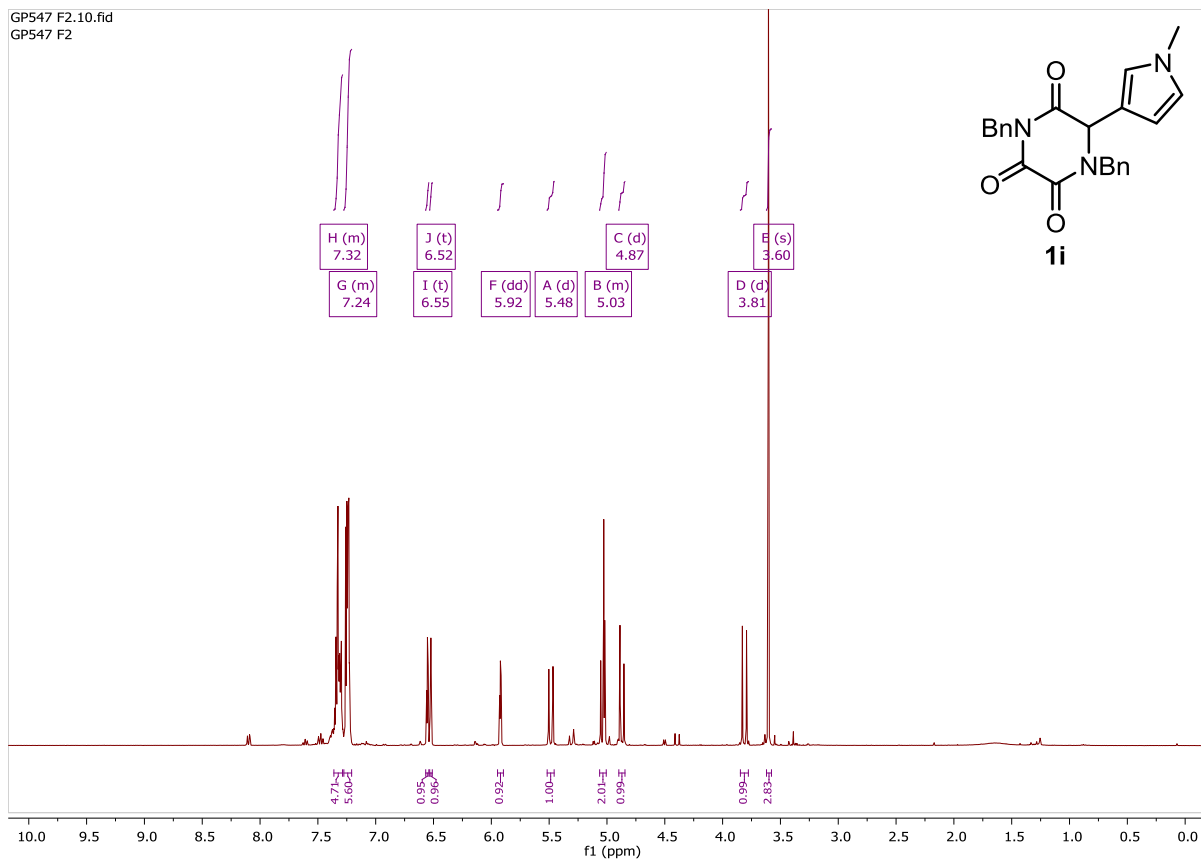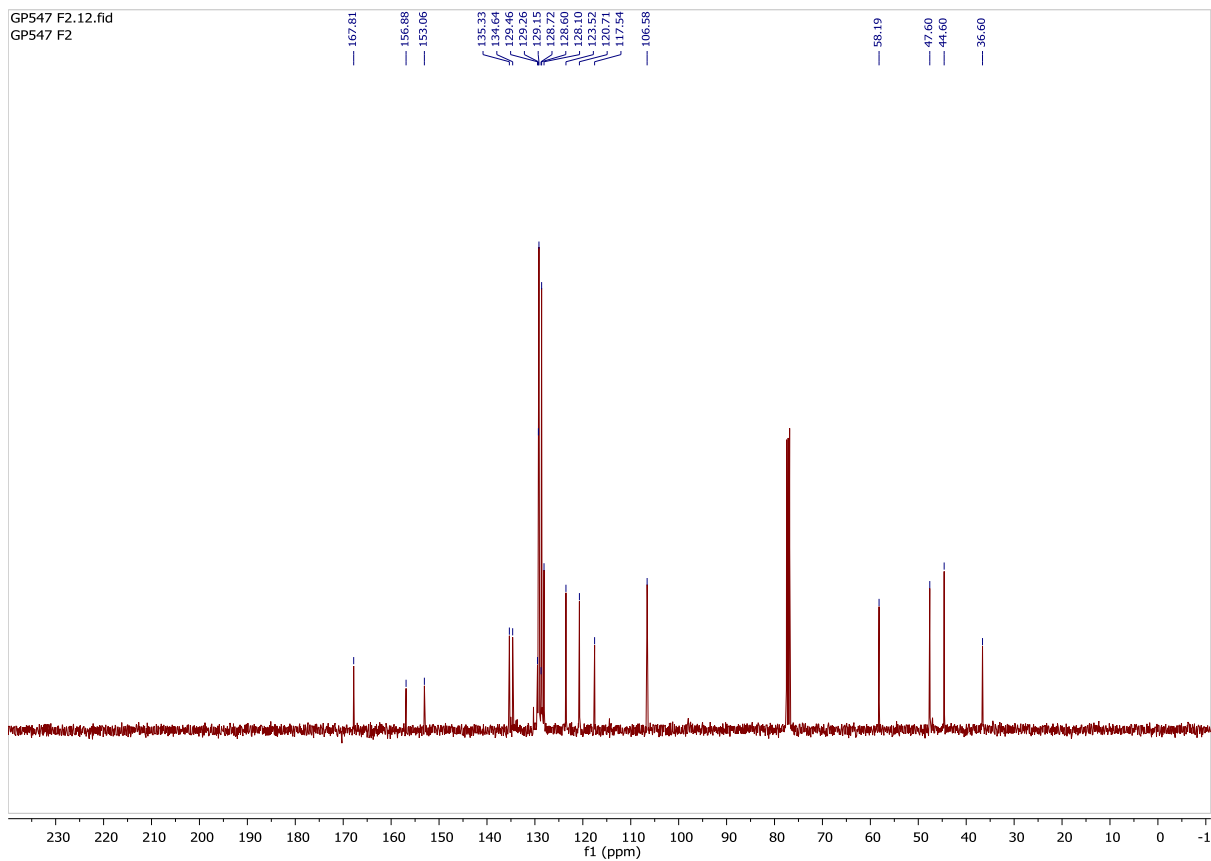

11-10-Simpkins-19.12.fid  
GP245 F3 recryst meoh

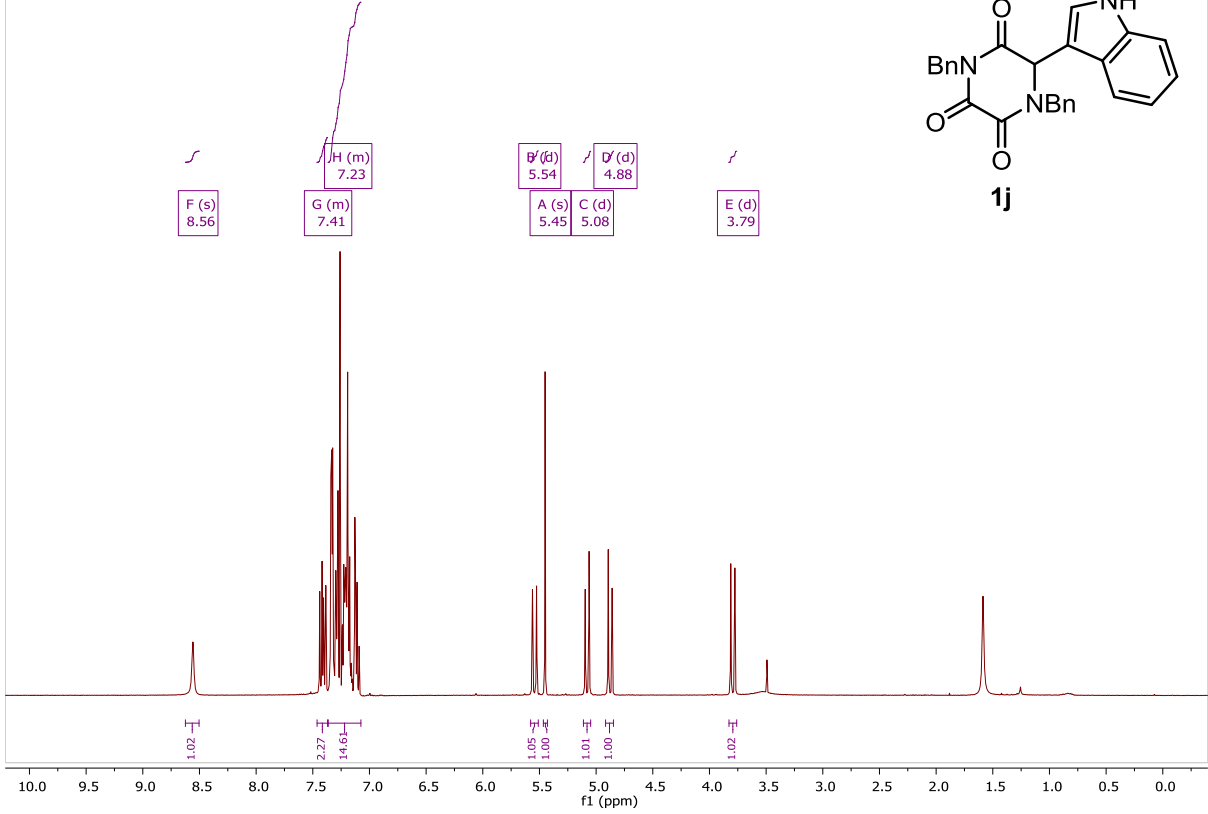

11-10-Simpkins-19.11.fid  
GP245 F3 recryst meoh

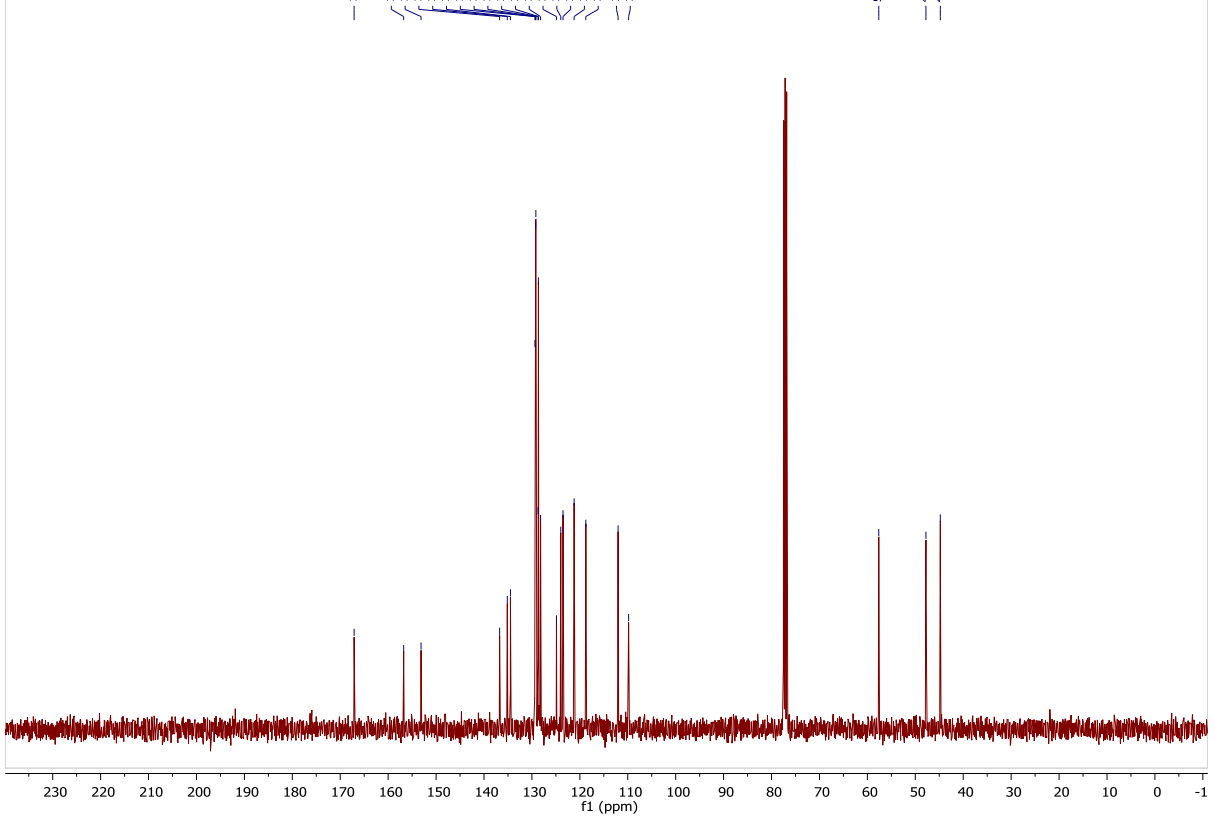

07-02-Simpkins-13.12.fid  
GP140

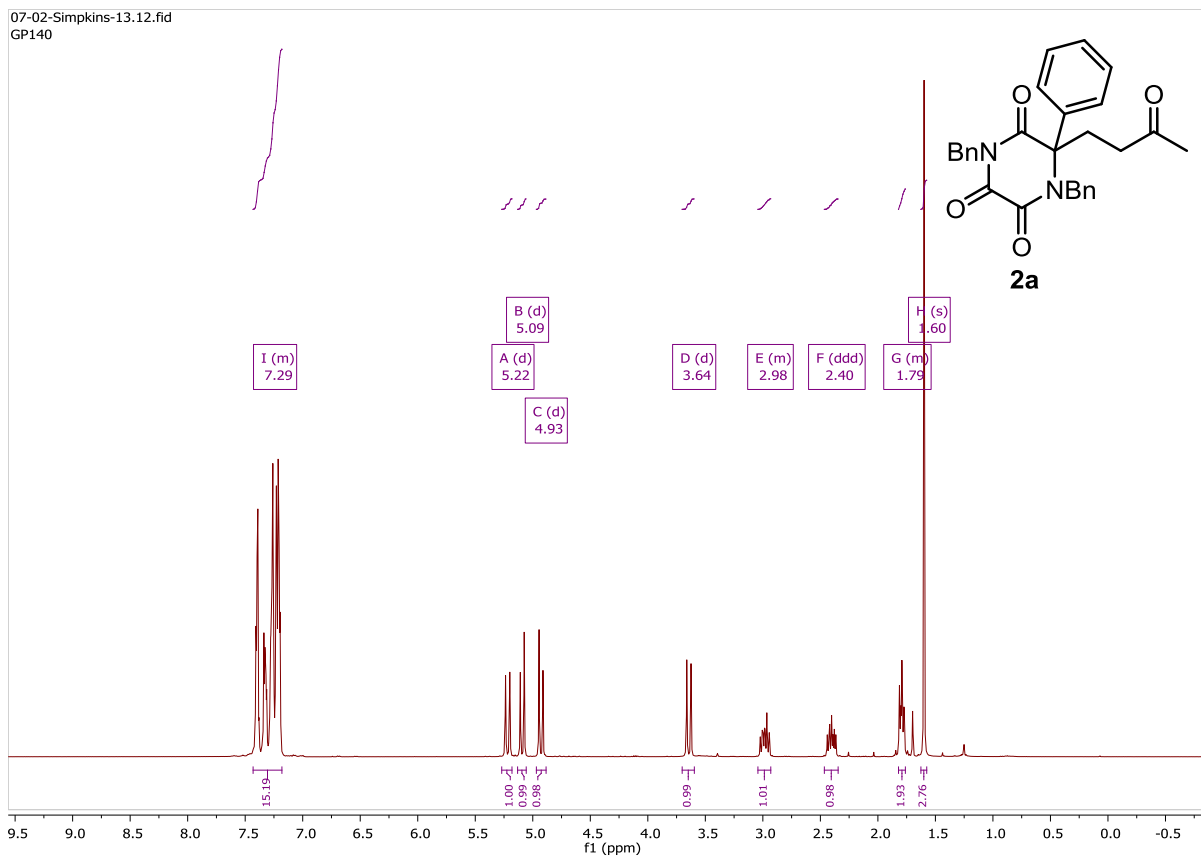

07-02-Simpkins-13.11.fid  
GP140

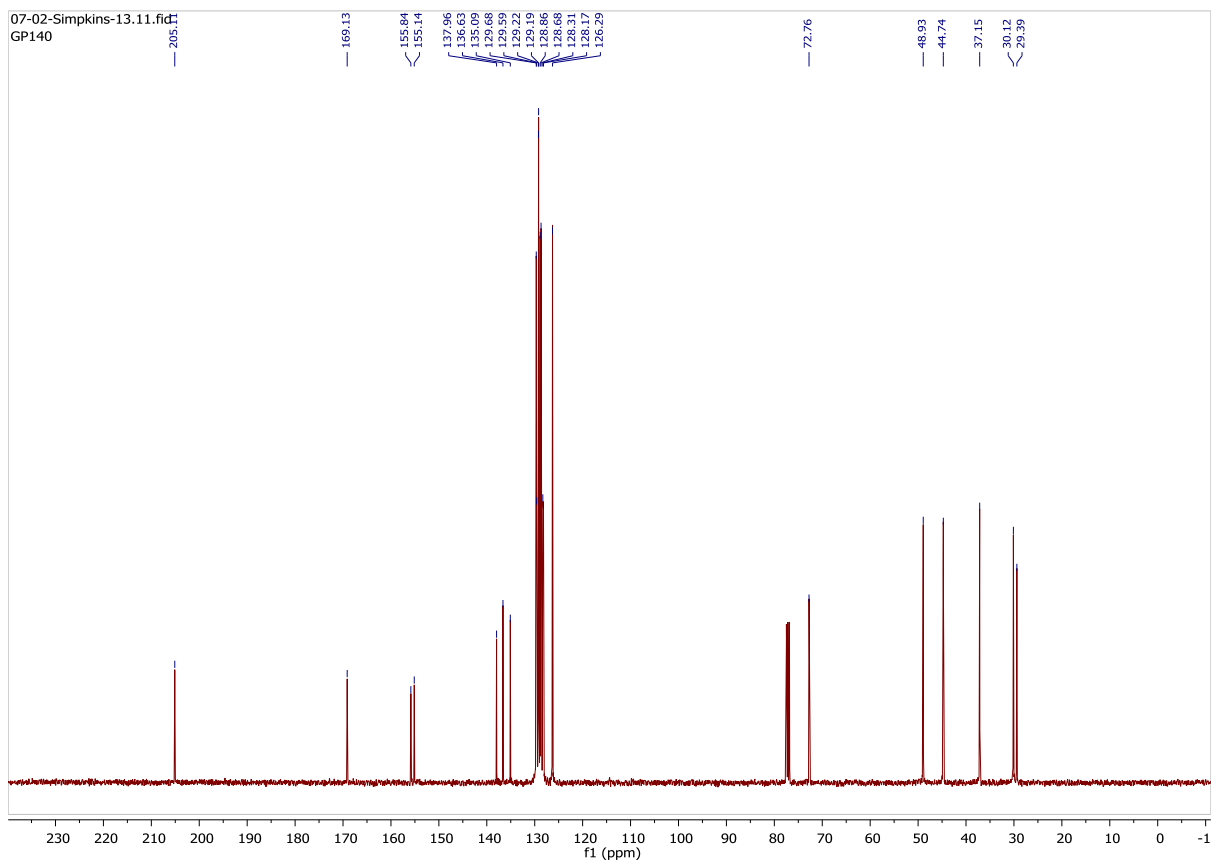

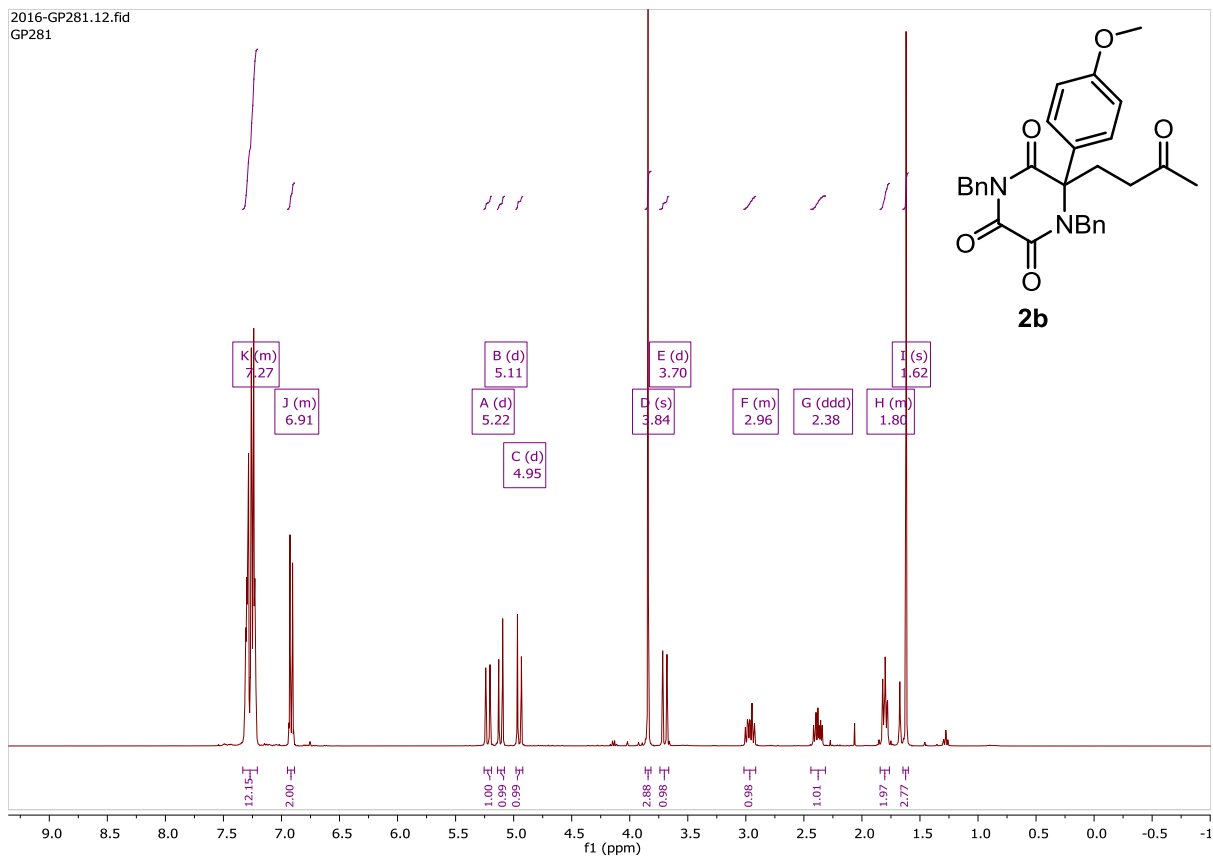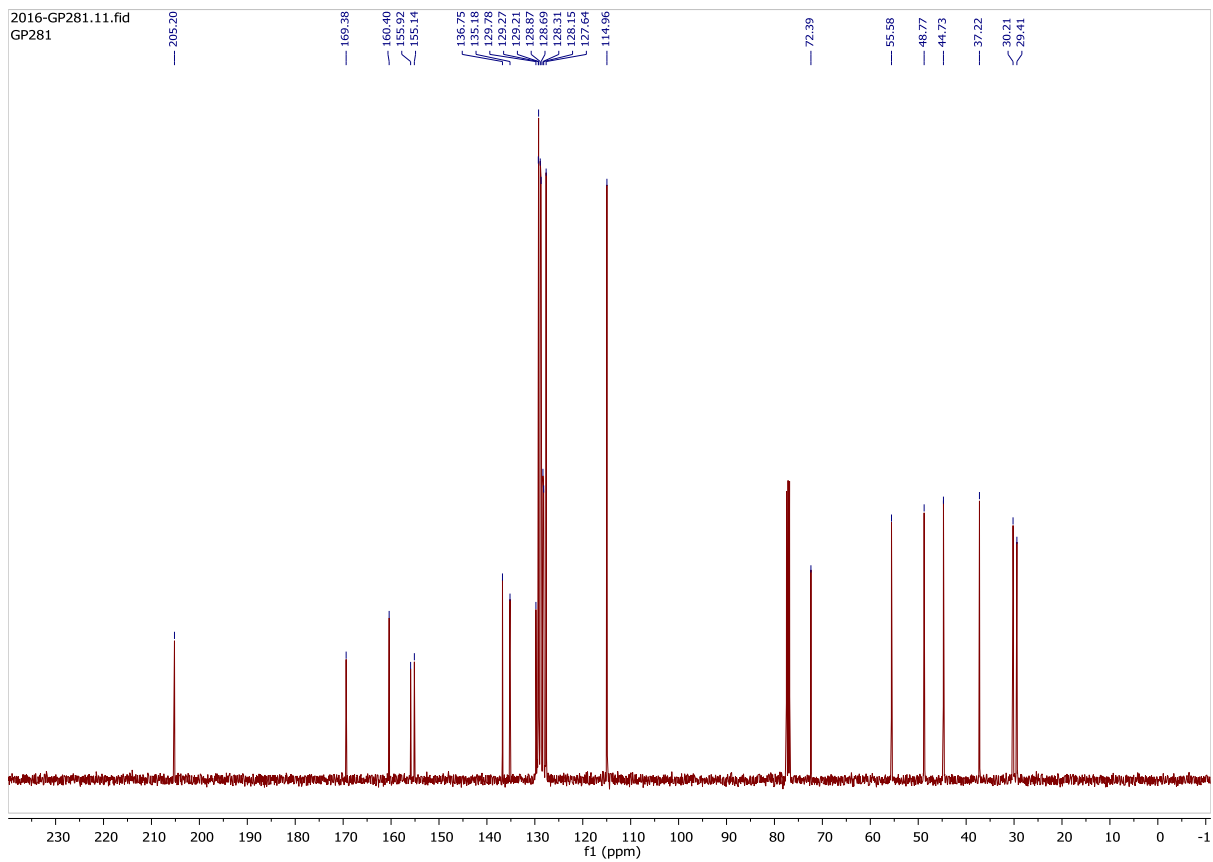

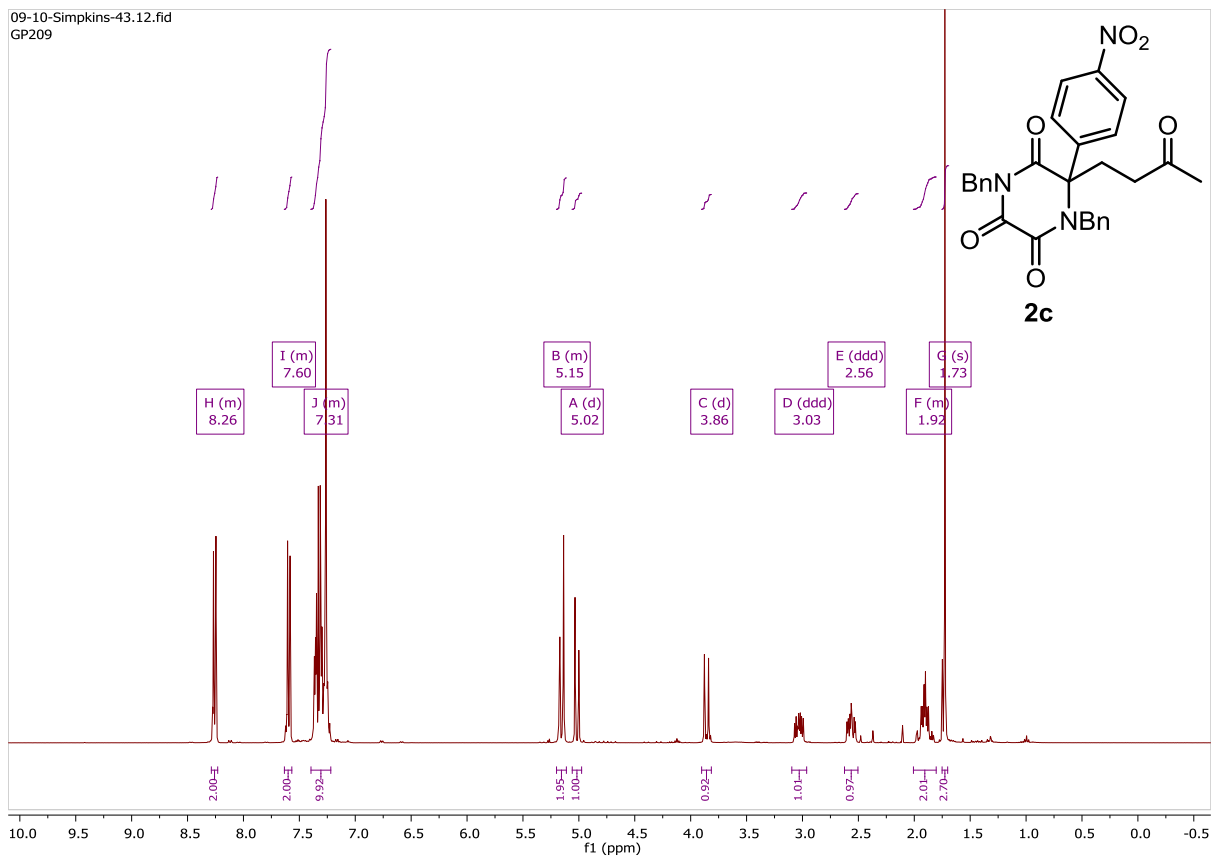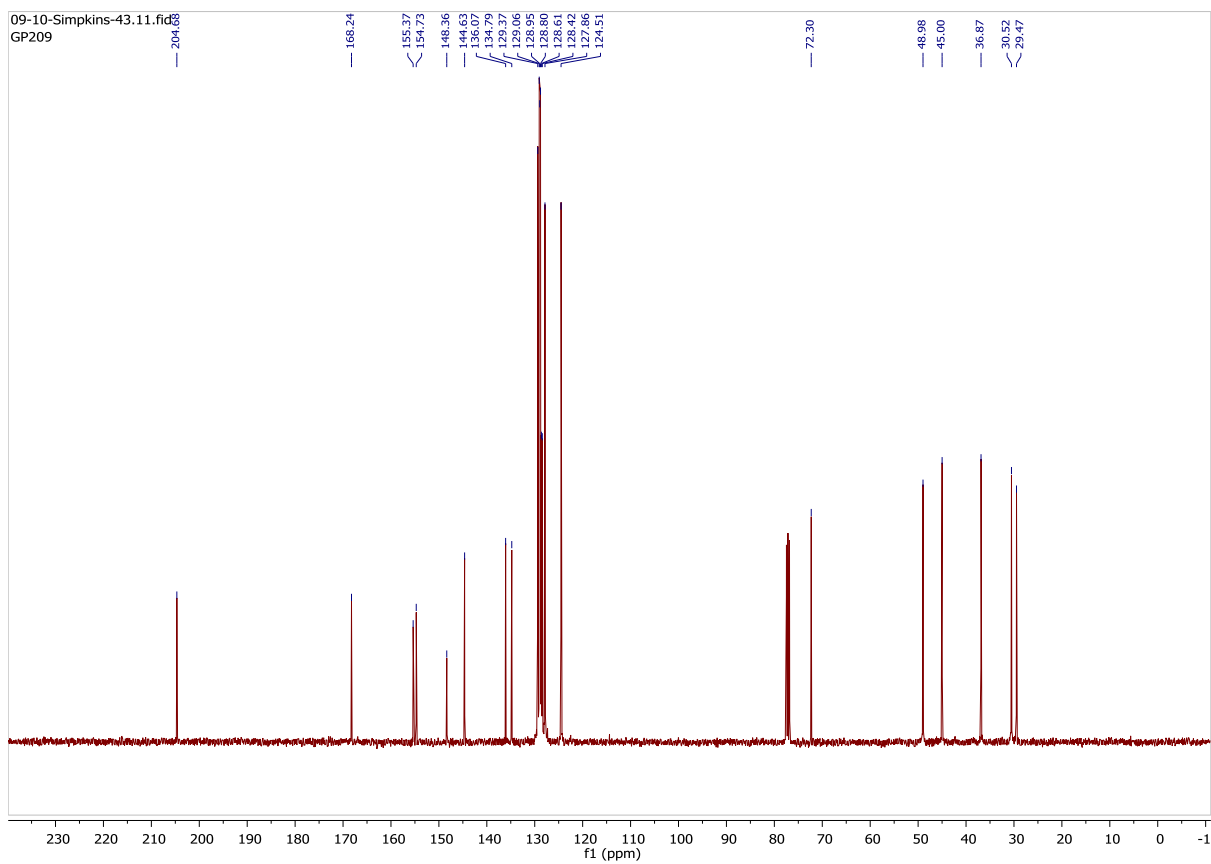

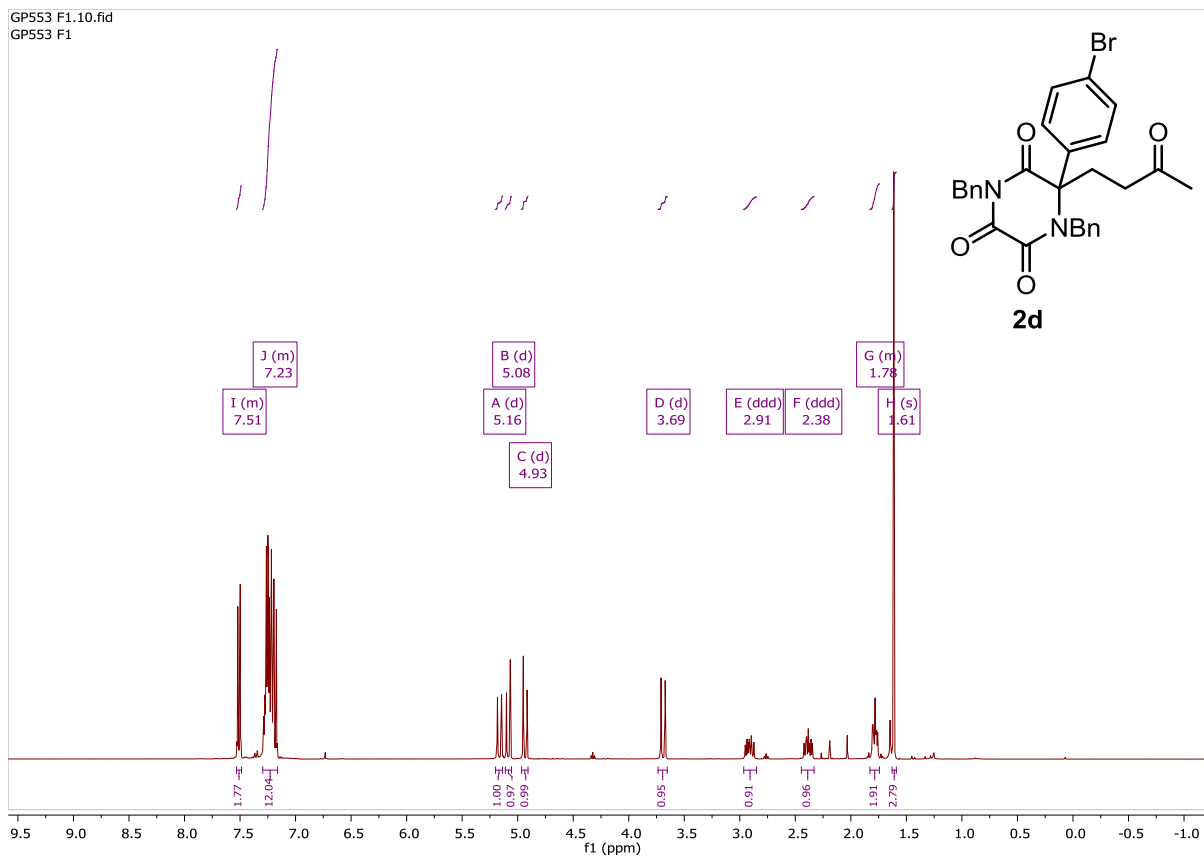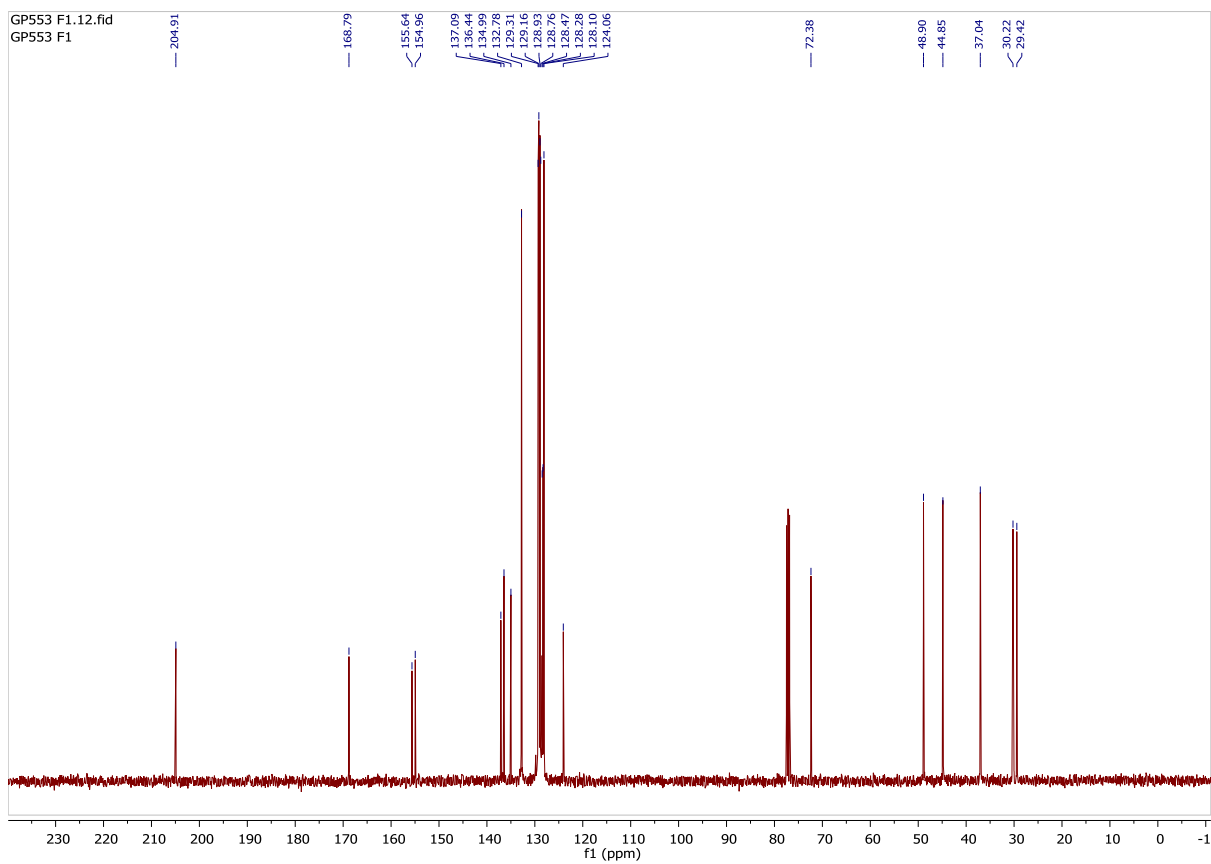

GP551 F1.20.fid  
GP551 F1

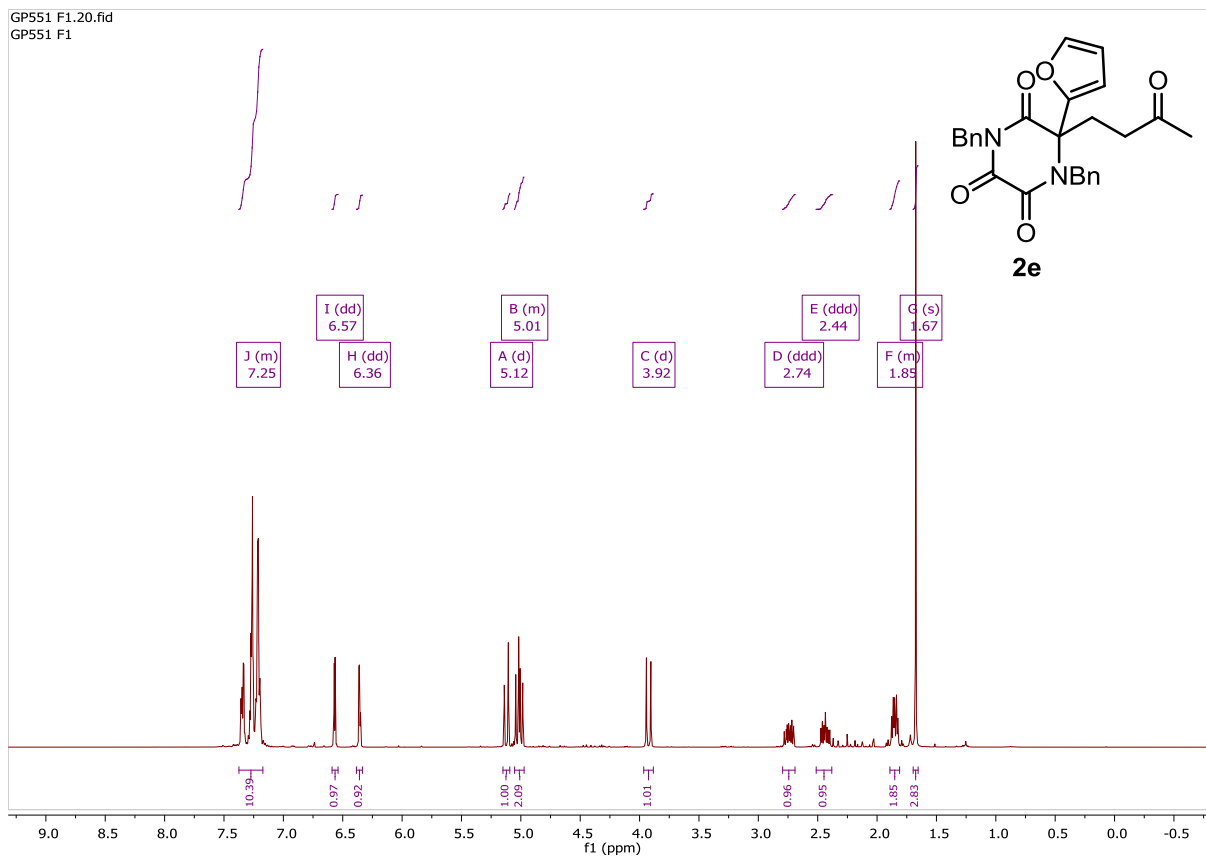

GP551 F1.22.fid  
GP551 F1

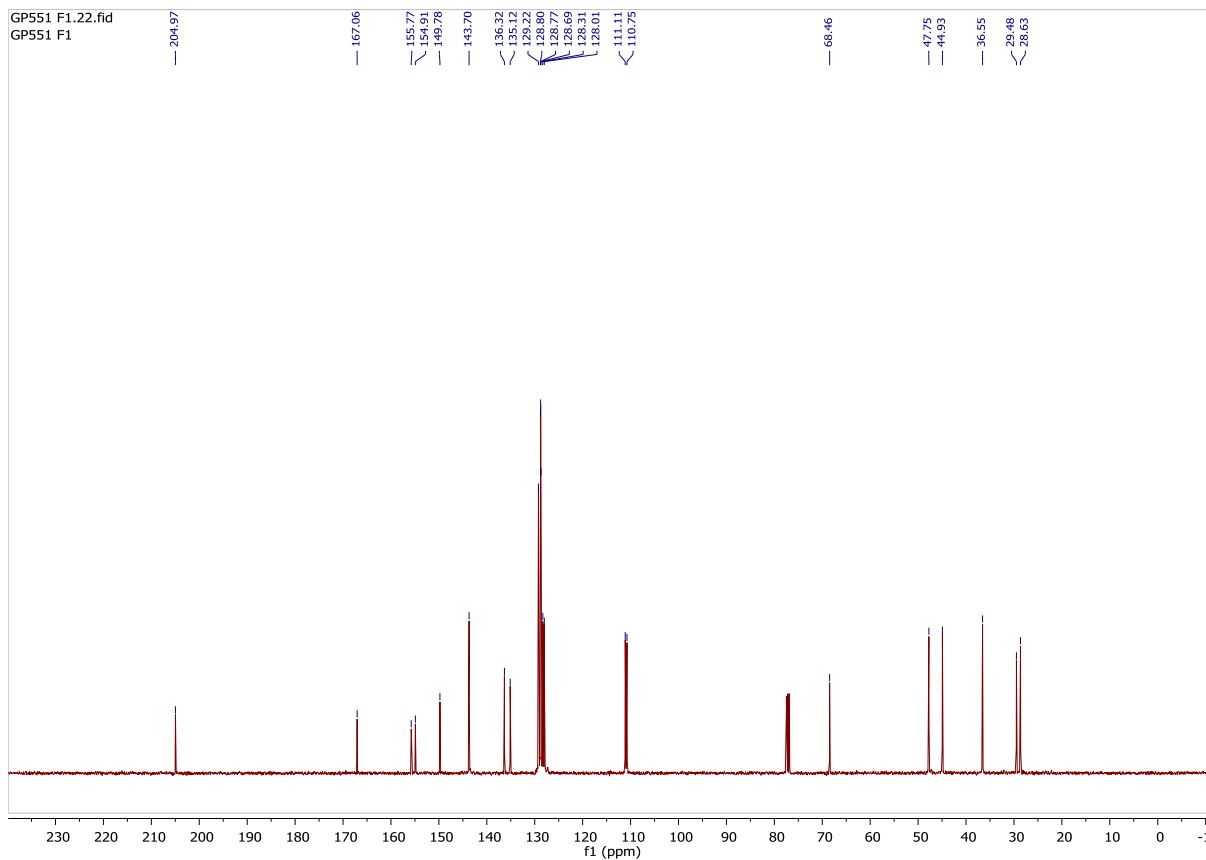

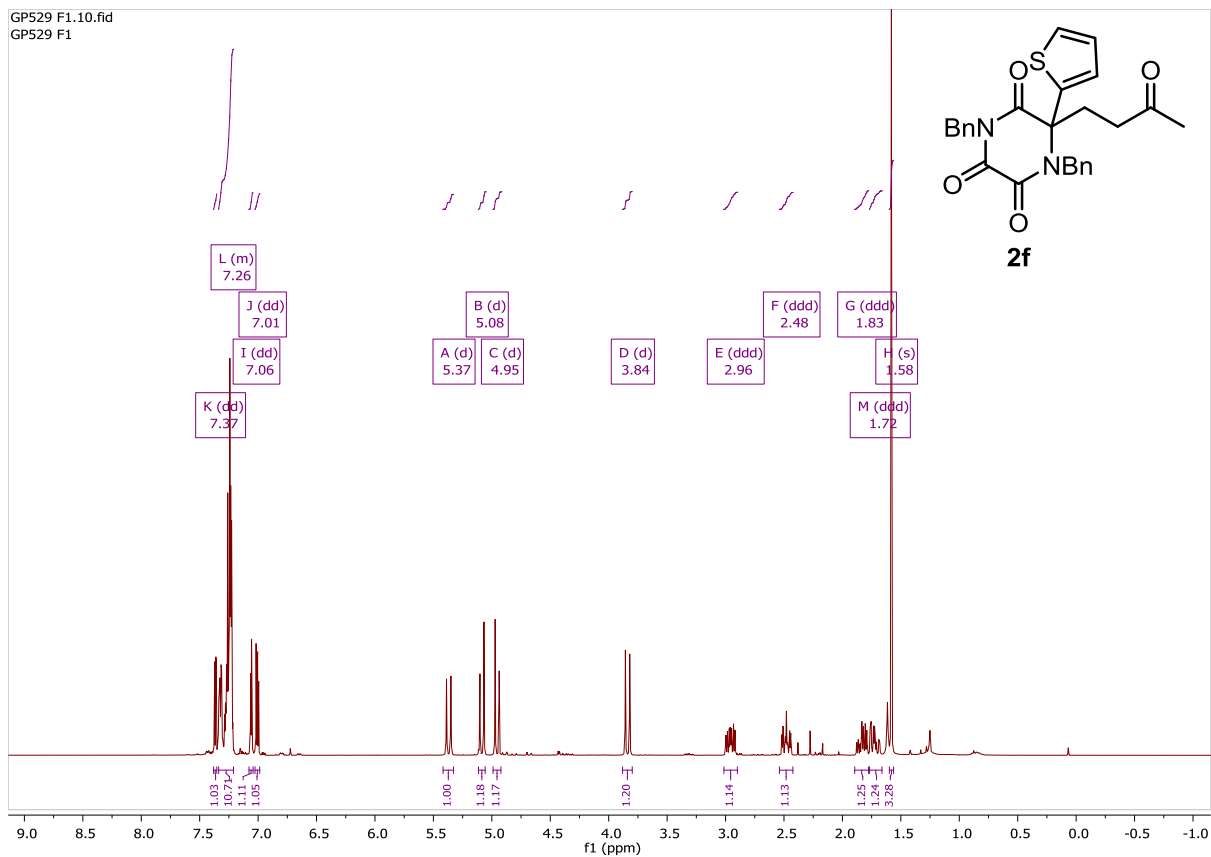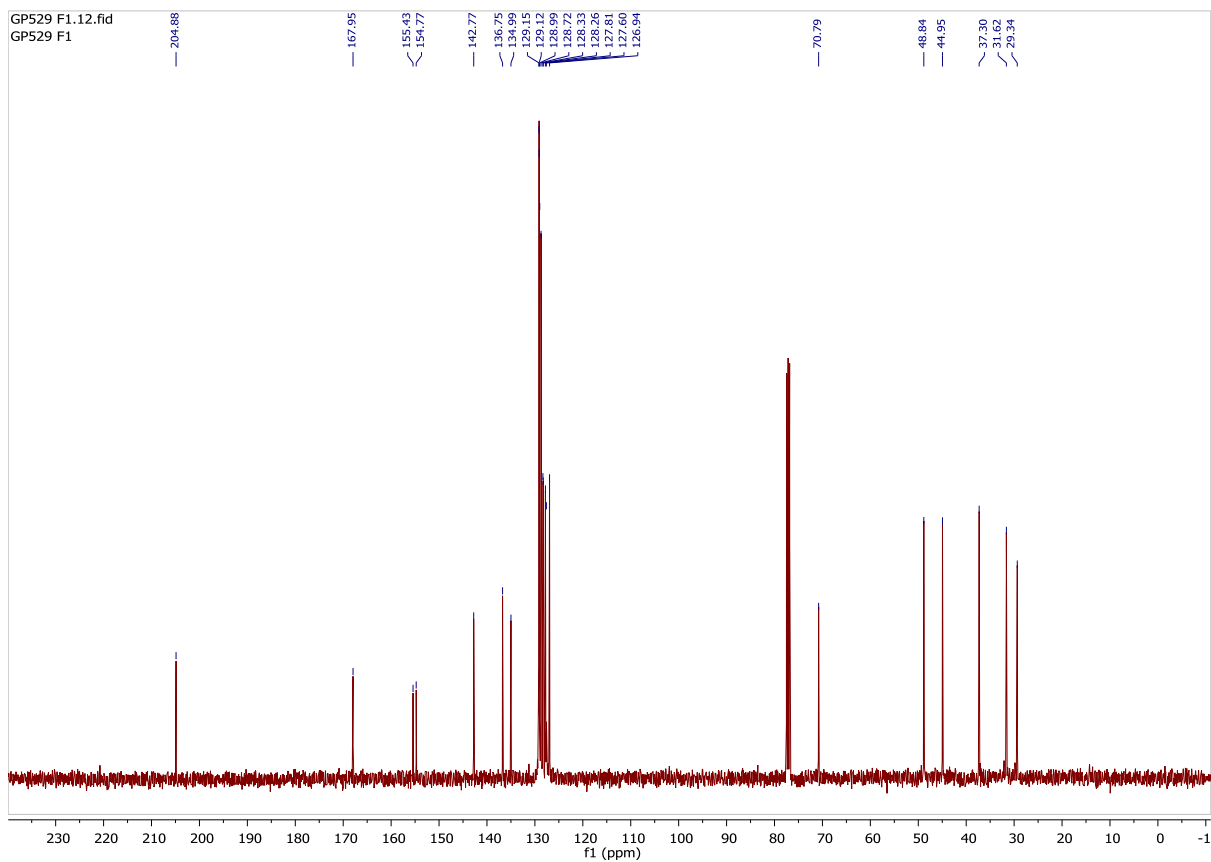



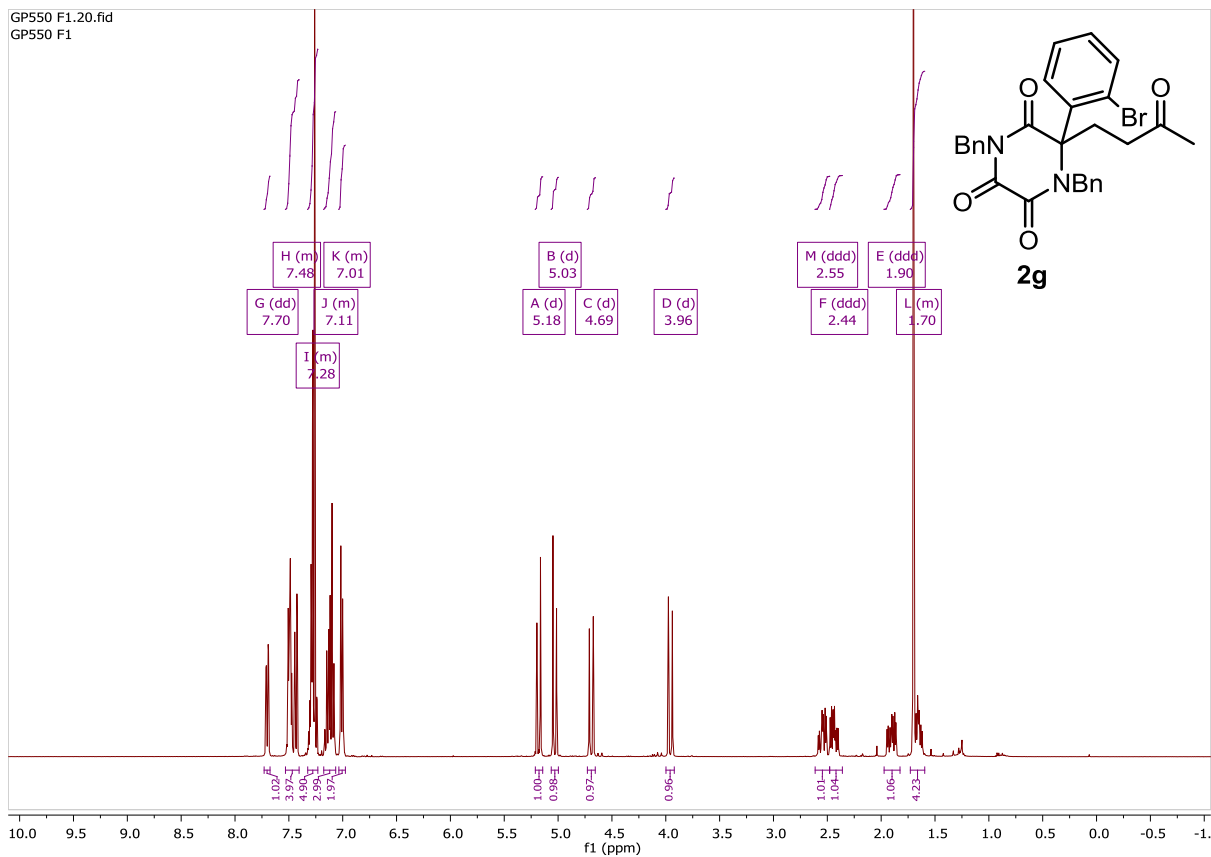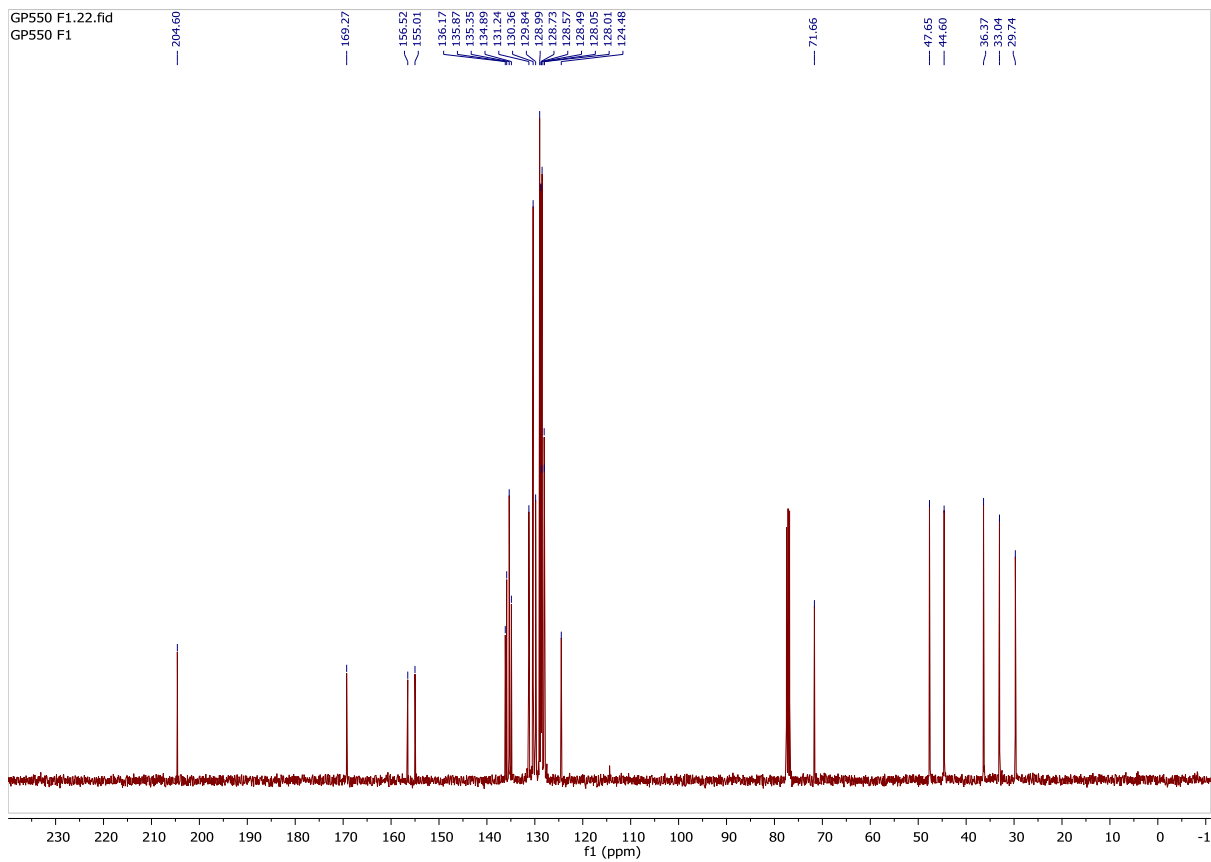

GP560 F1.10.fid  
GP560 F1

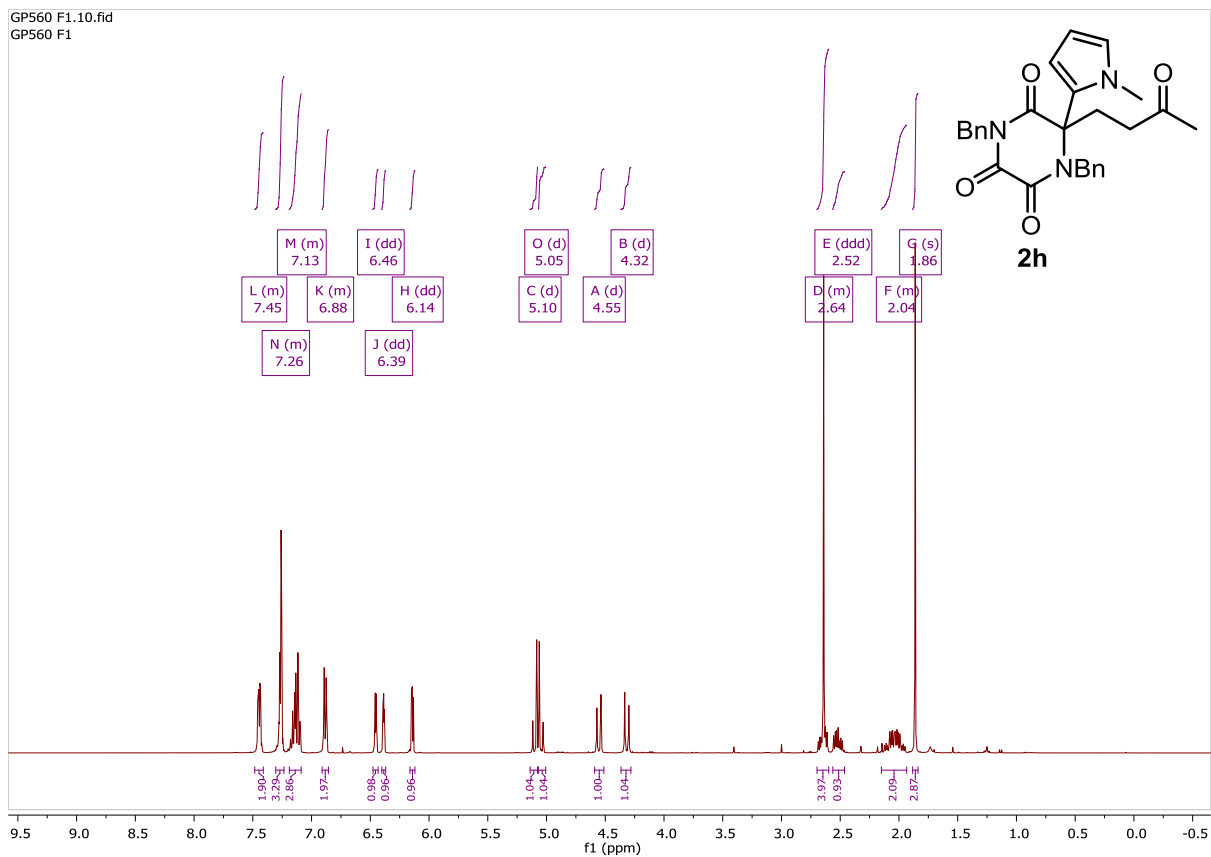

GP560 F1.12.fid  
GP560 F1

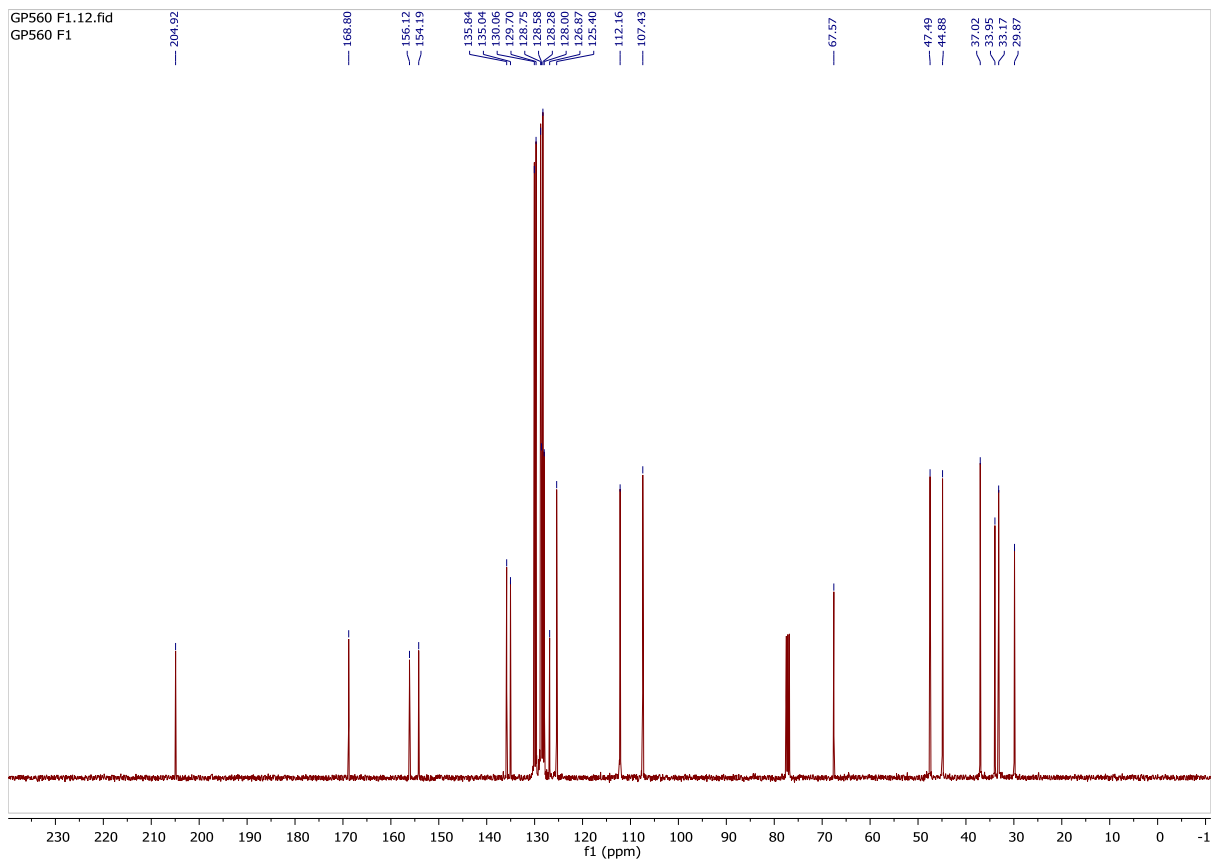

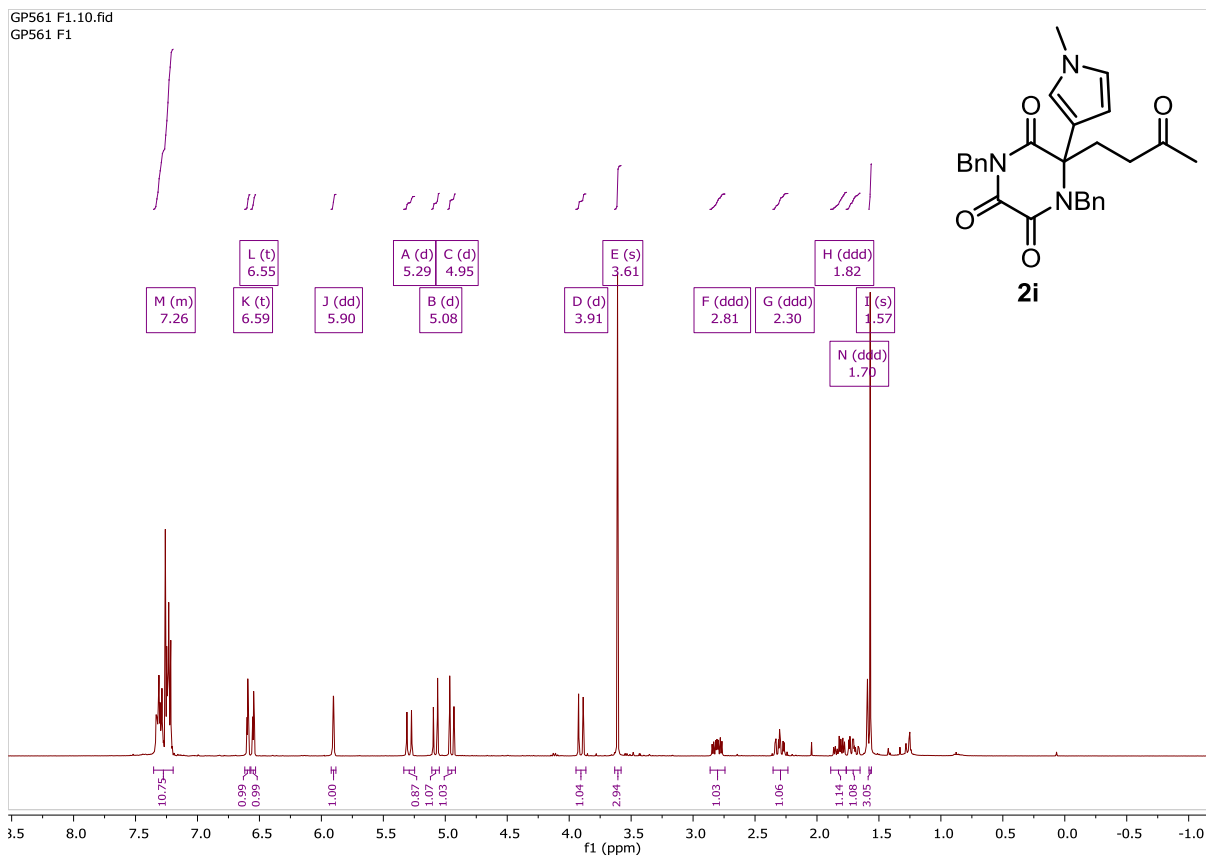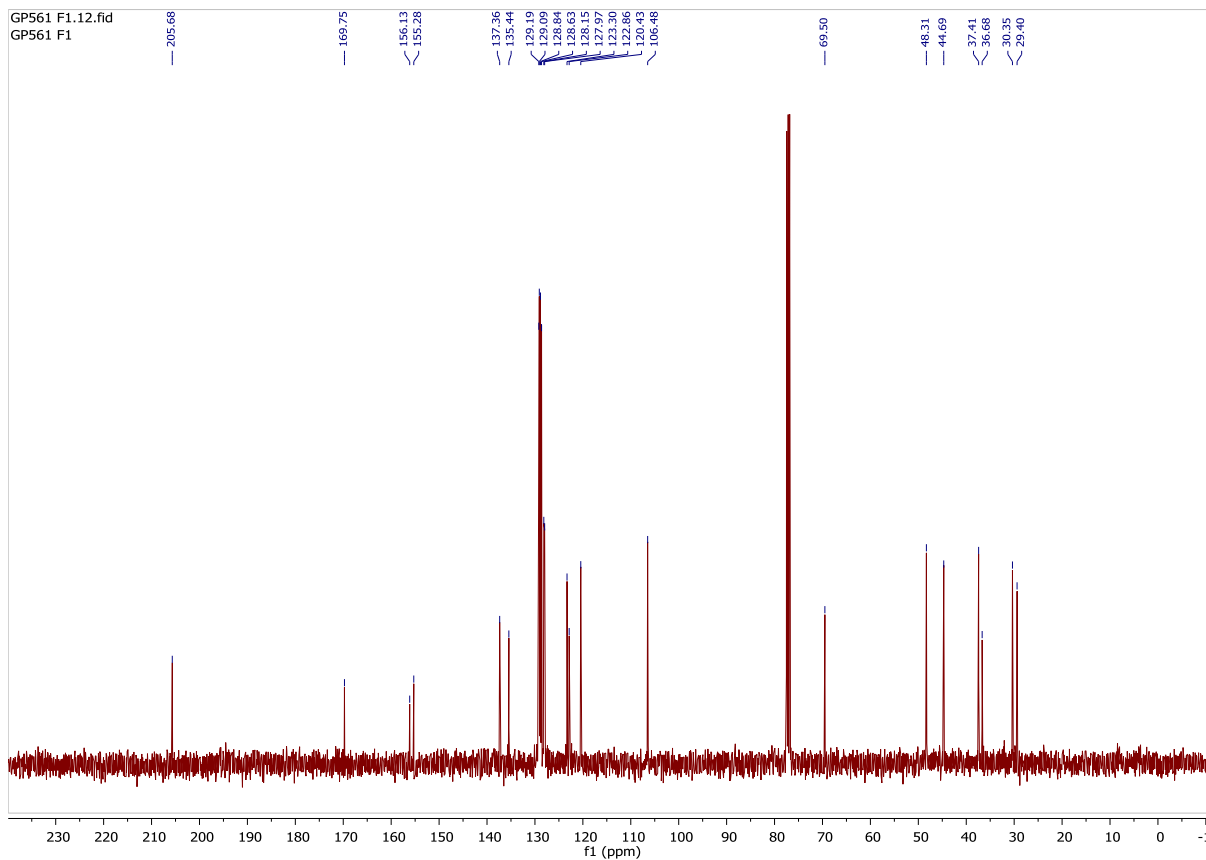

GP436.22.fid  
GP436

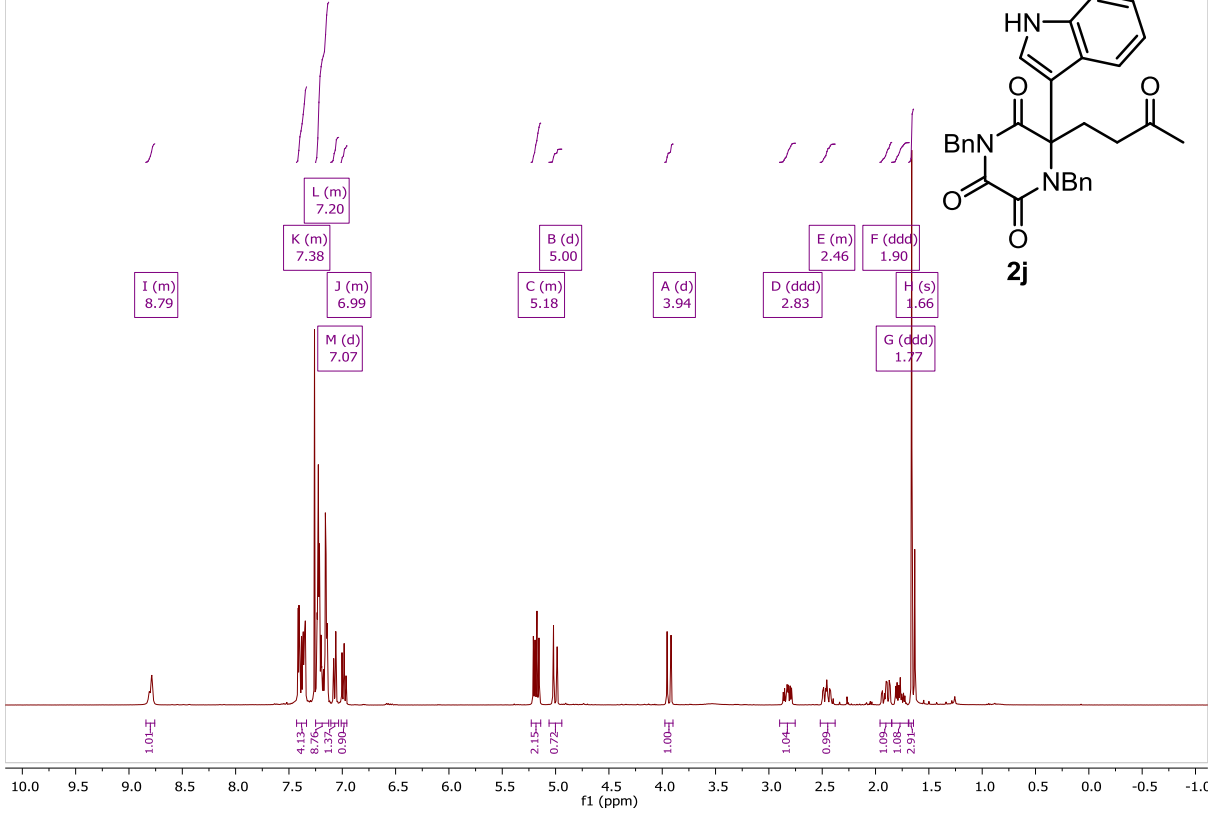

GP436.21.fid  
GP436

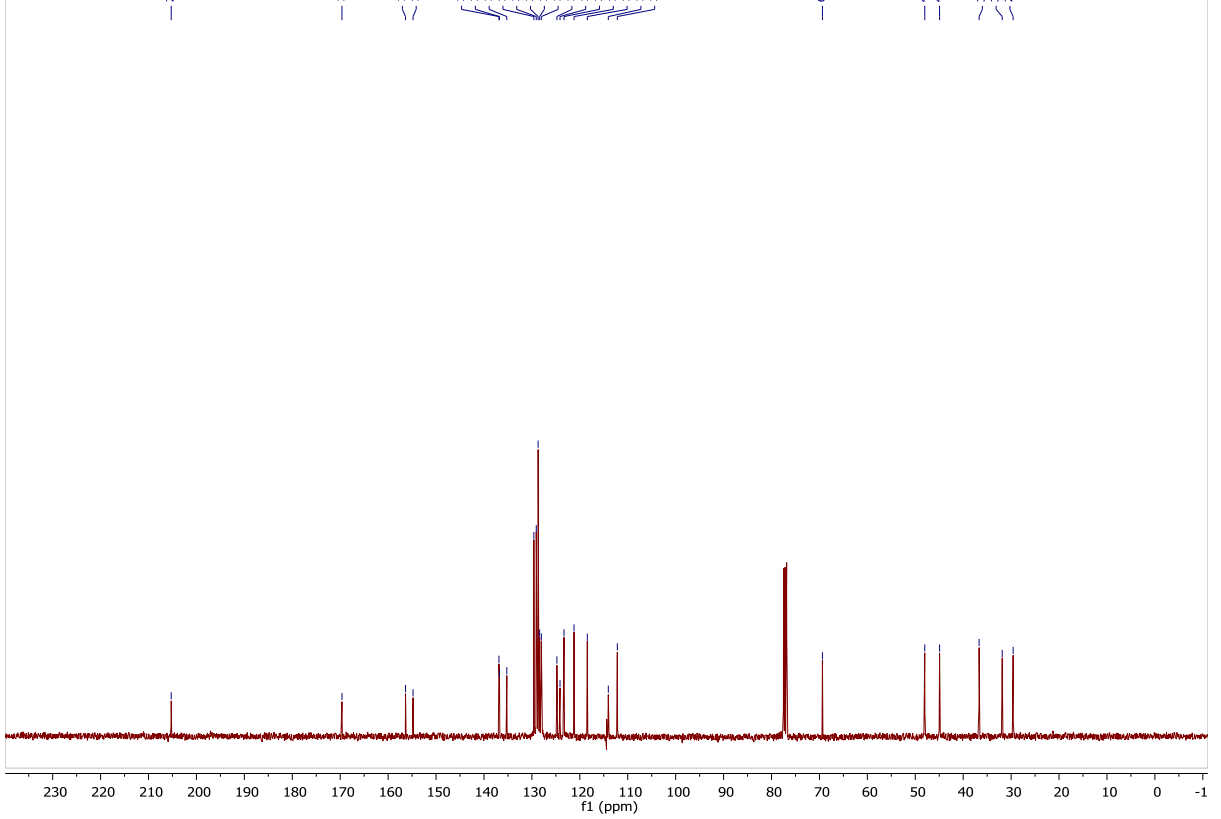

07-02-Simpkins-15.12.fid  
GP141

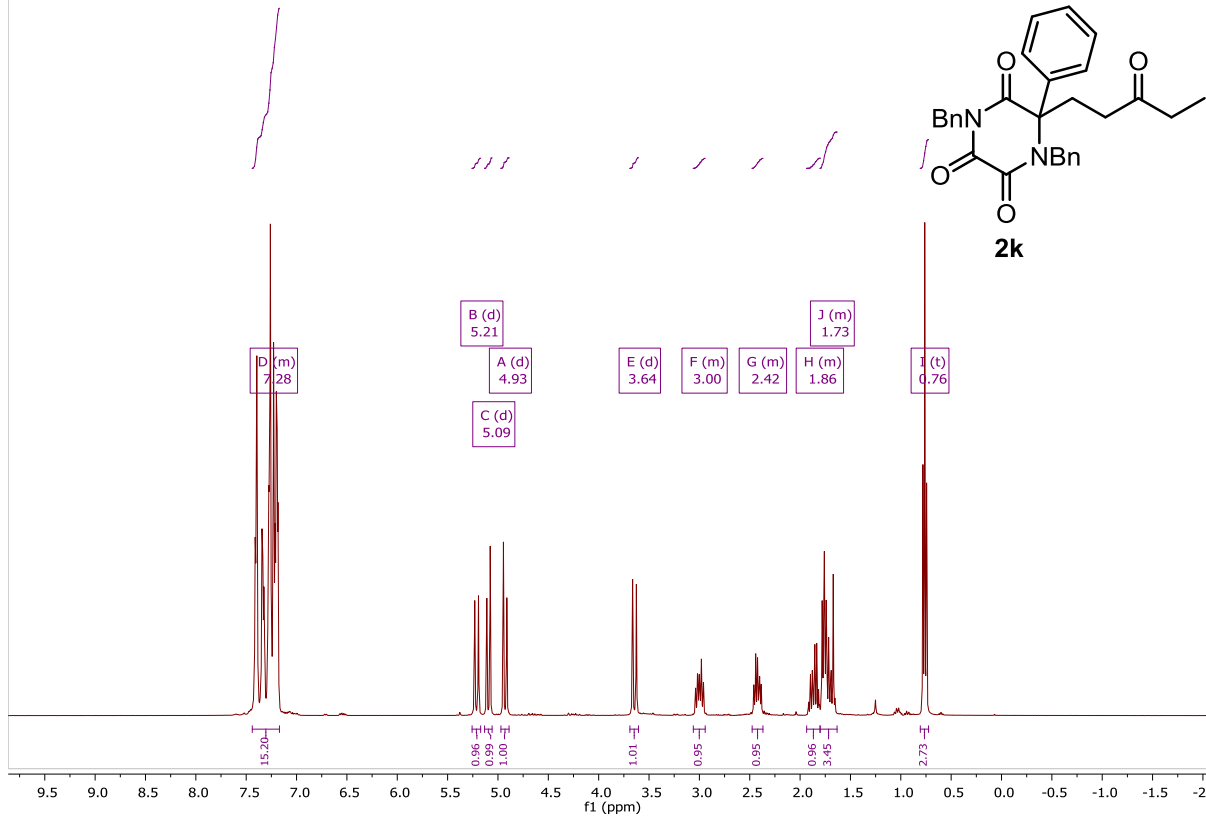

07-02-Simpkins-15.11.fid  
GP141

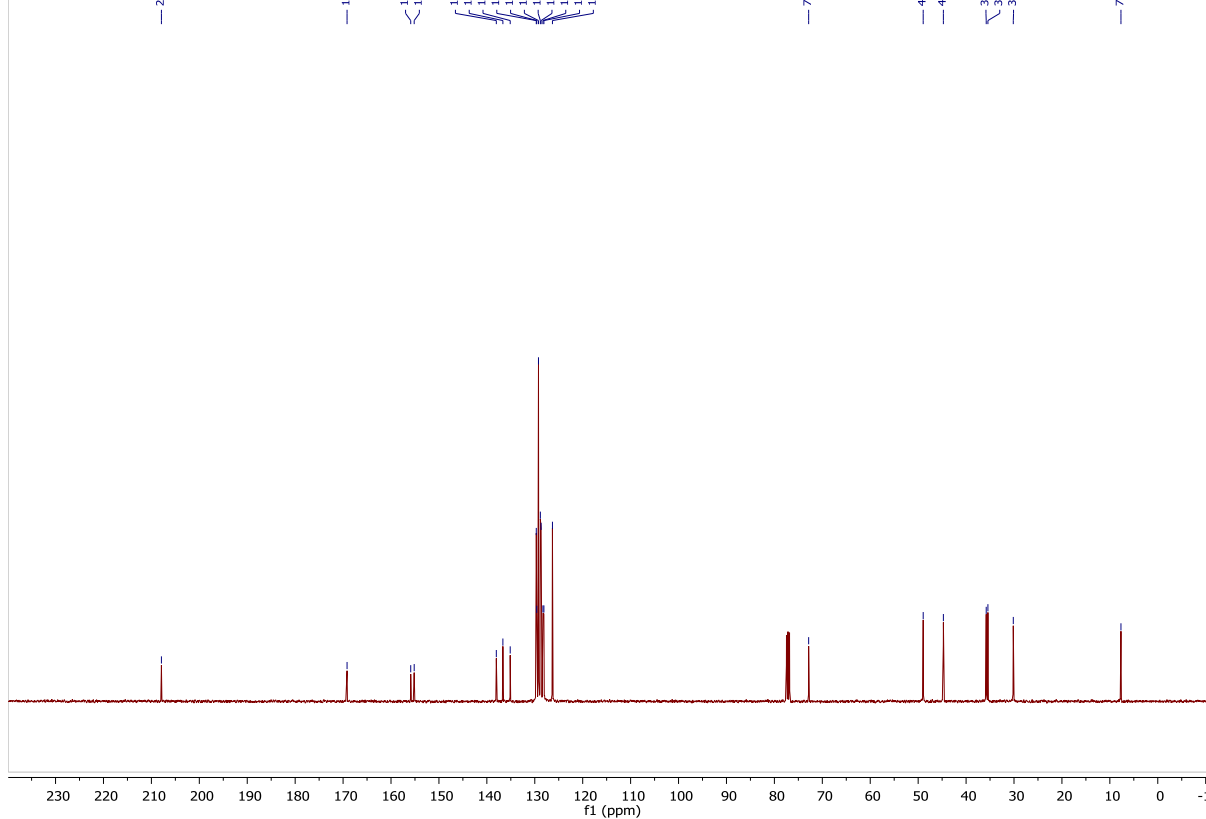

GP633 F1.1.fid  
GP633 F1

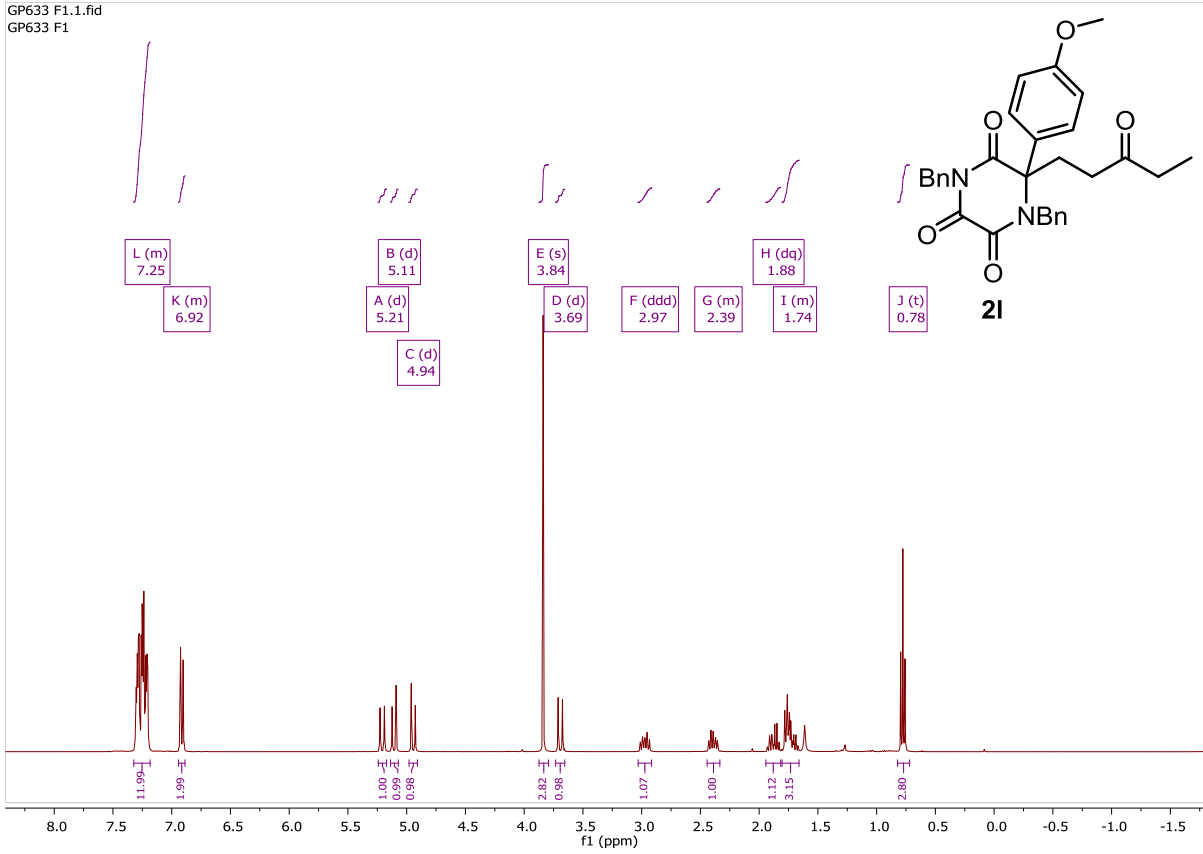

GP633 1.2.fid  
GP633 1

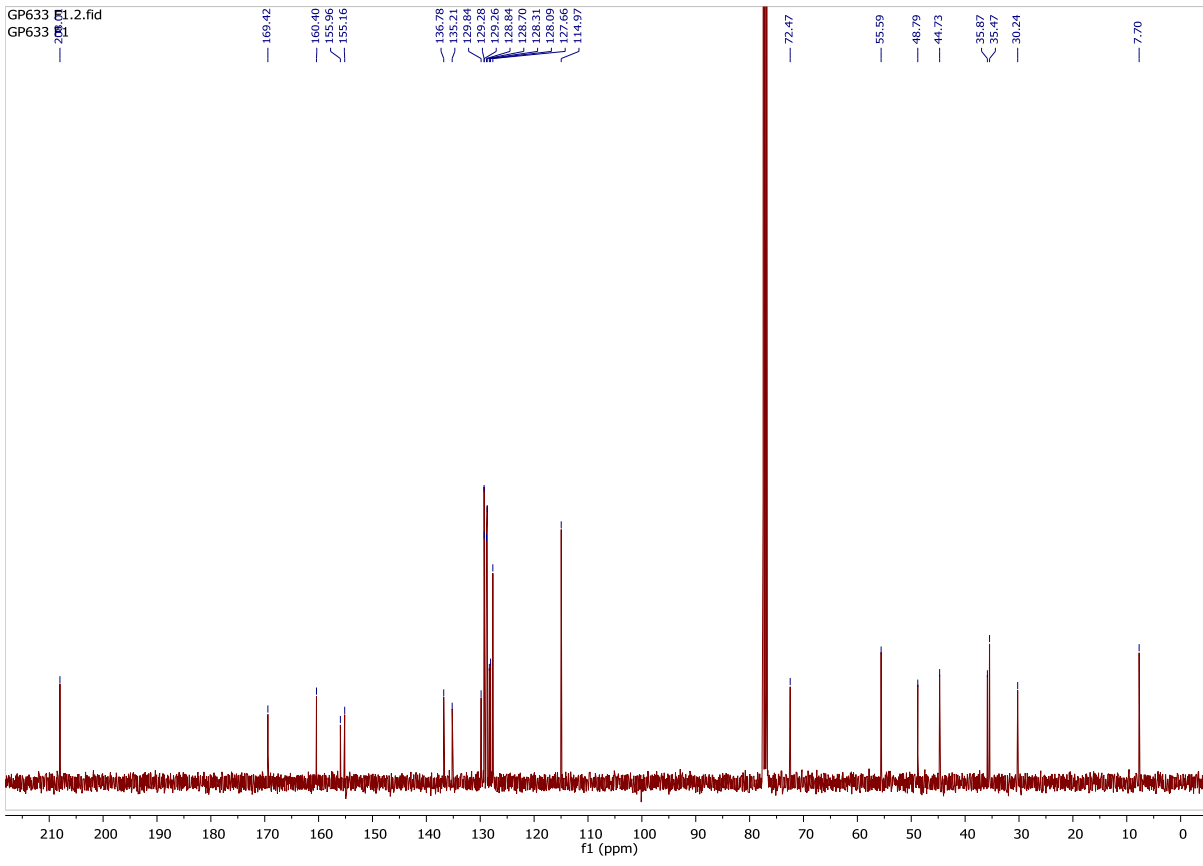

09-10-Simpkins-49.12.fid  
GP211

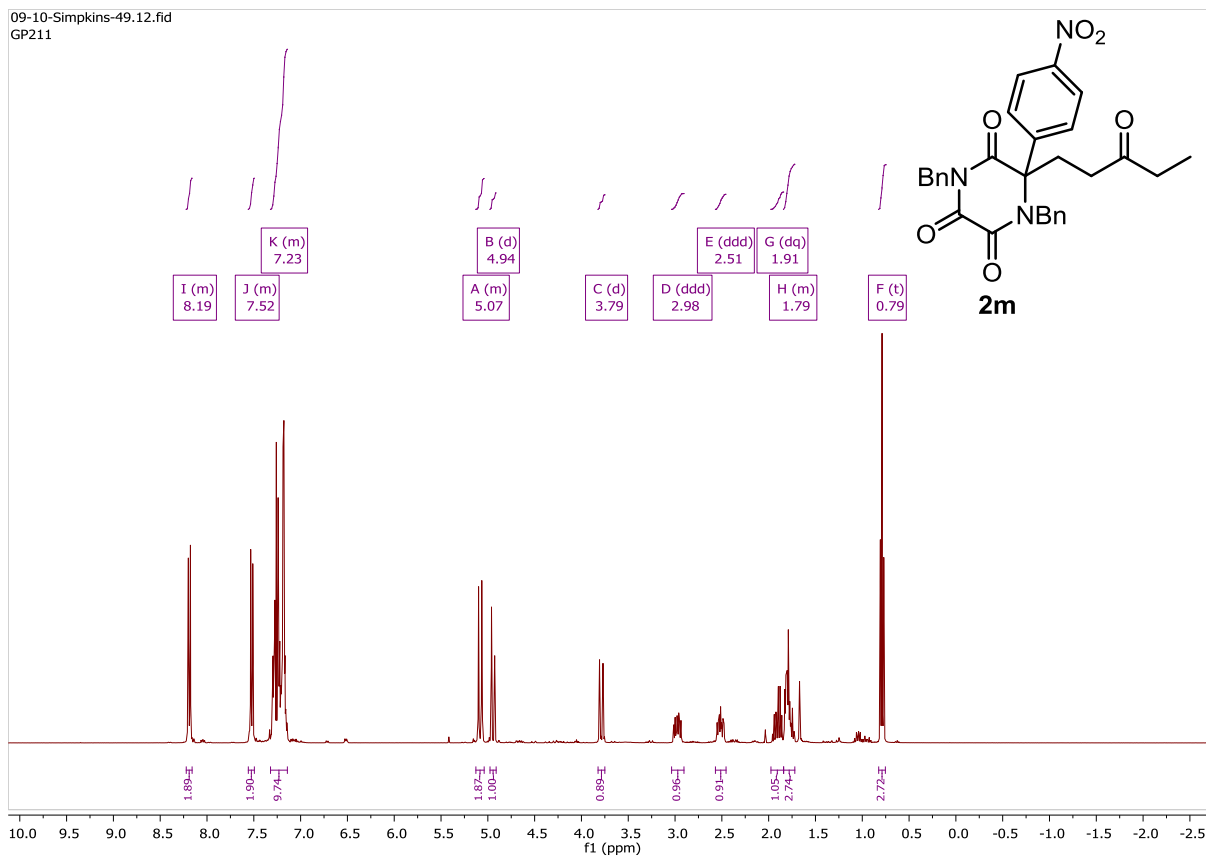

09-10-Simpkins-49.11.fid  
GP211

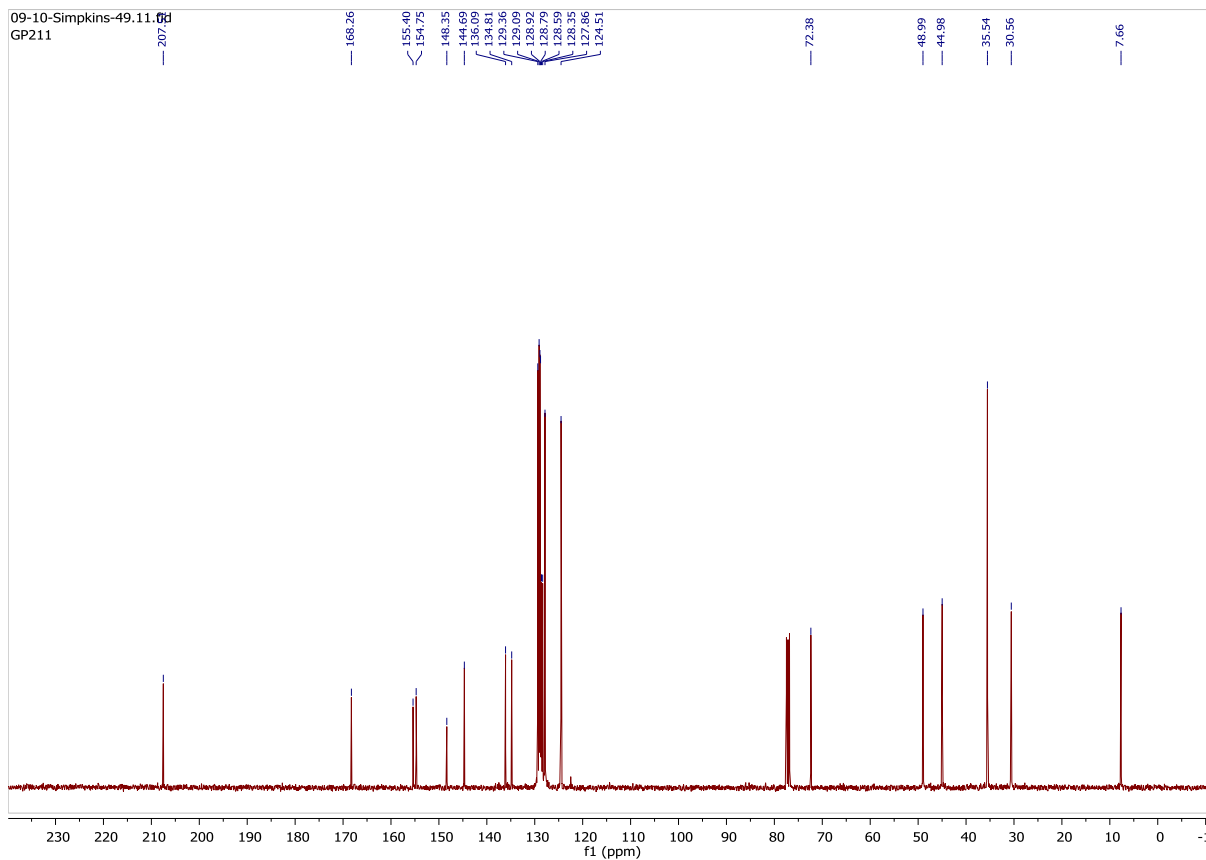

07-23-Simpkins-3.12.fid  
GP162

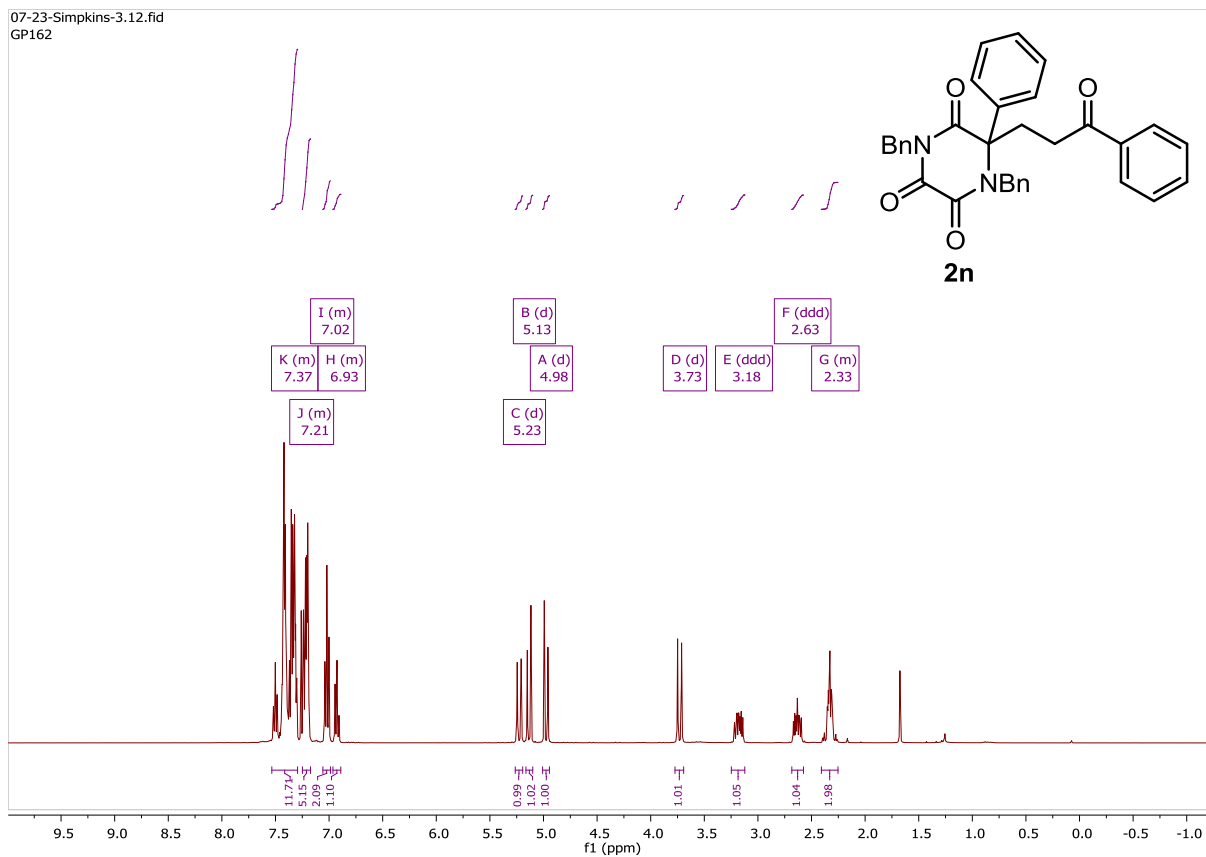

07-23-Simpkins-3.11.fid  
GP162

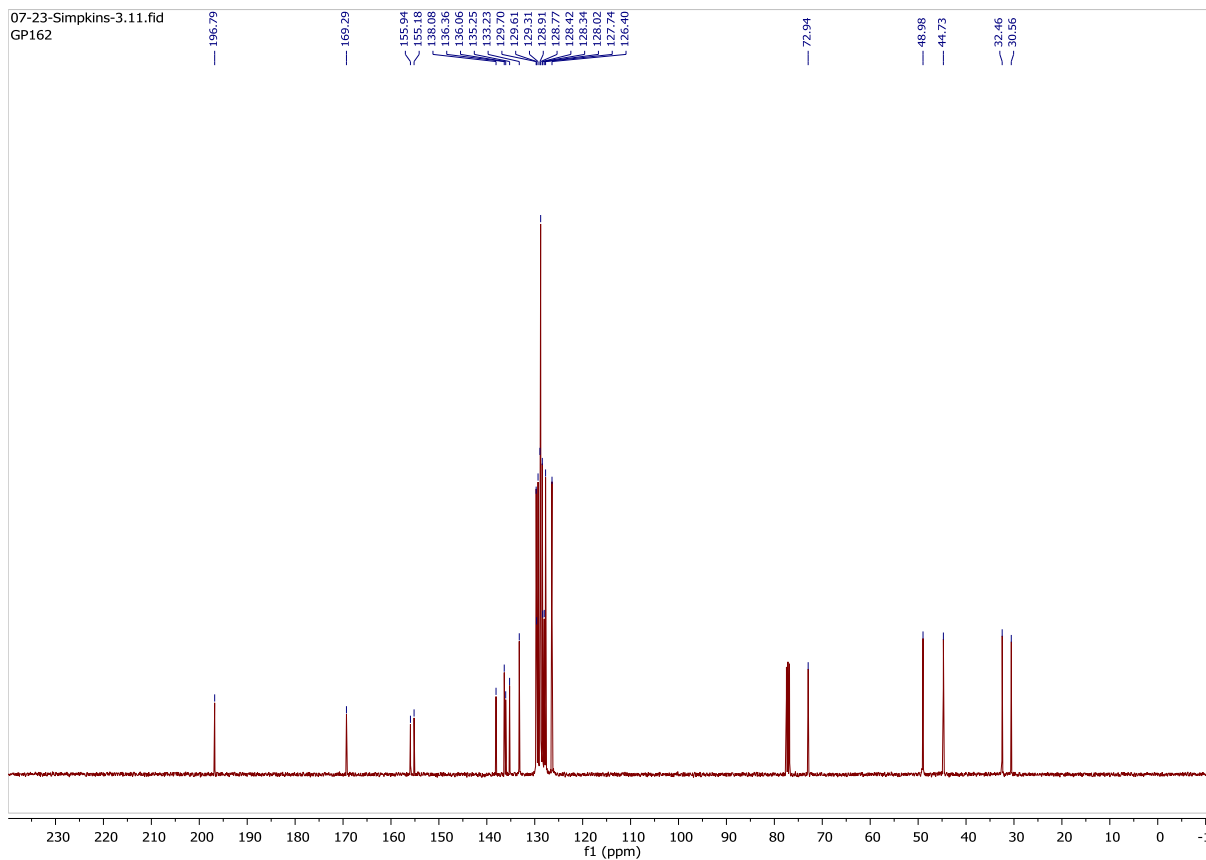



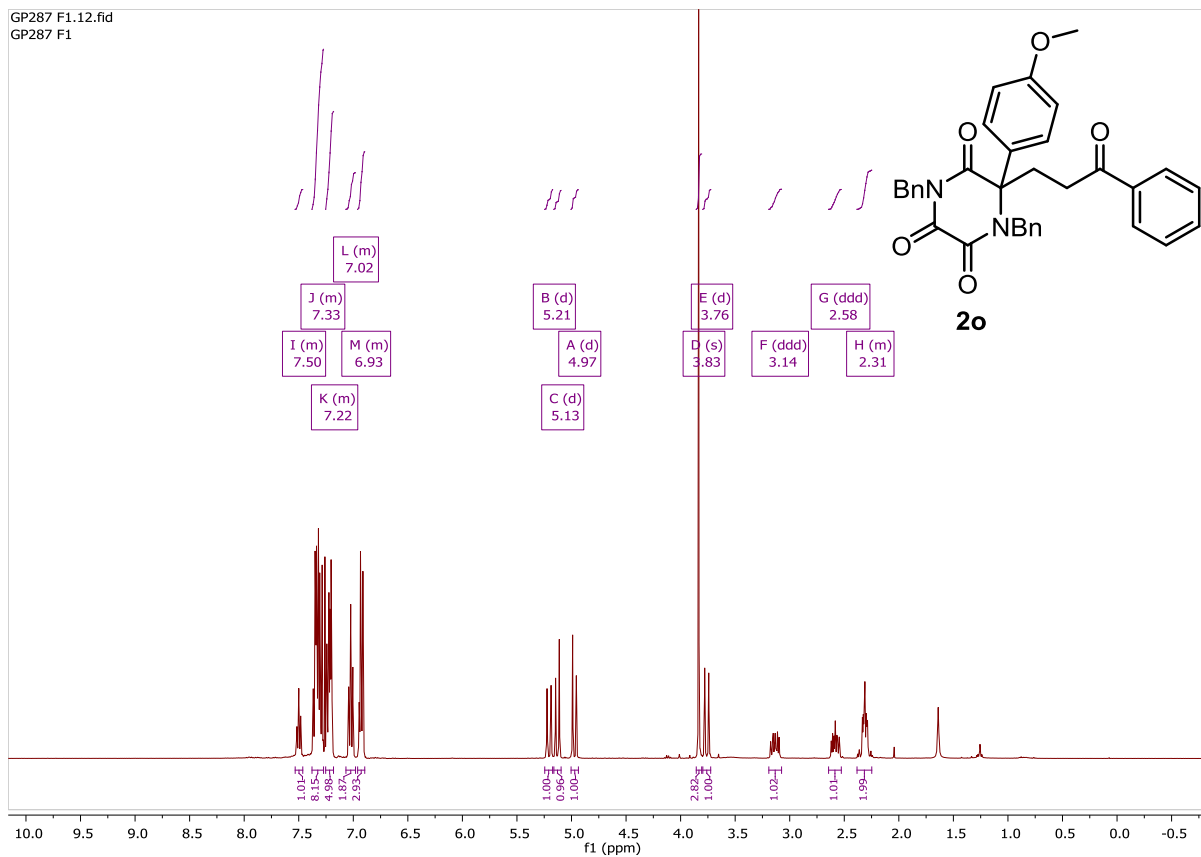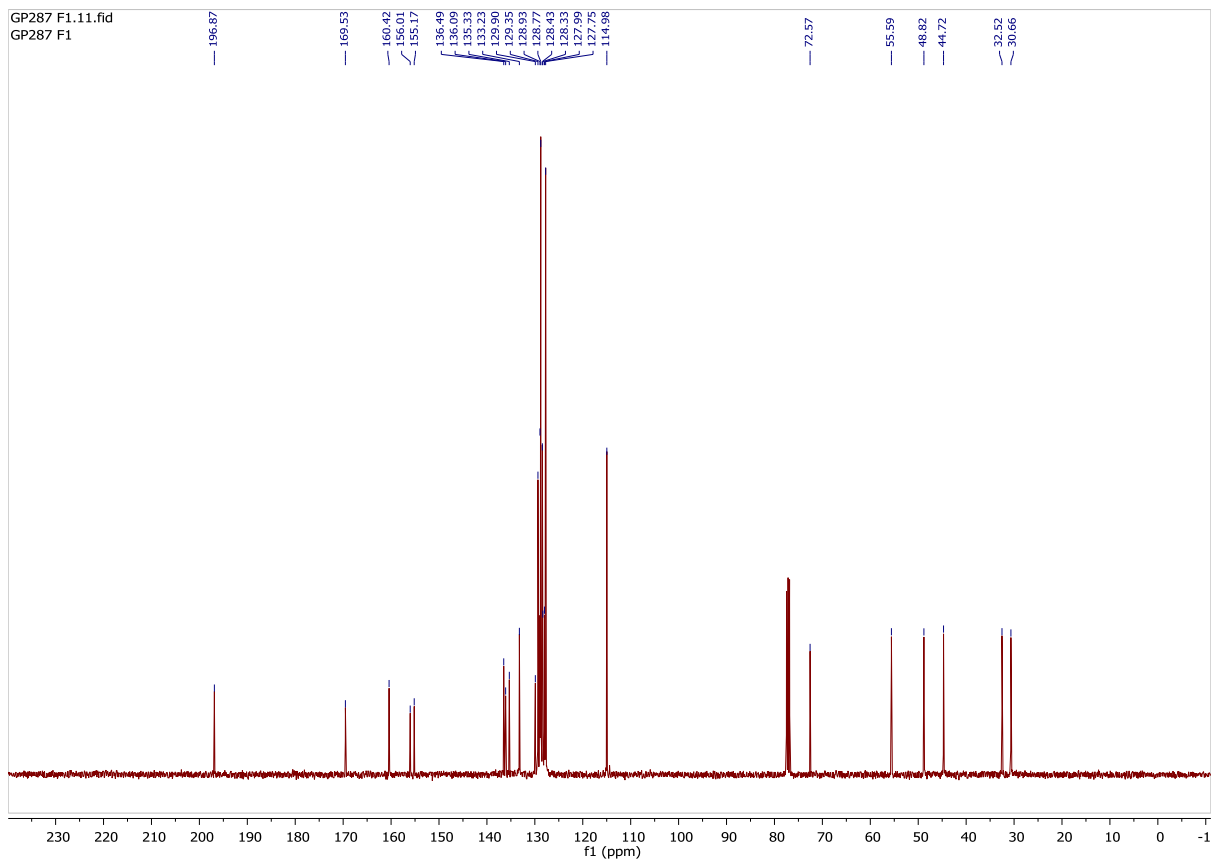

GP578 F1.10.fid  
GP578 F1

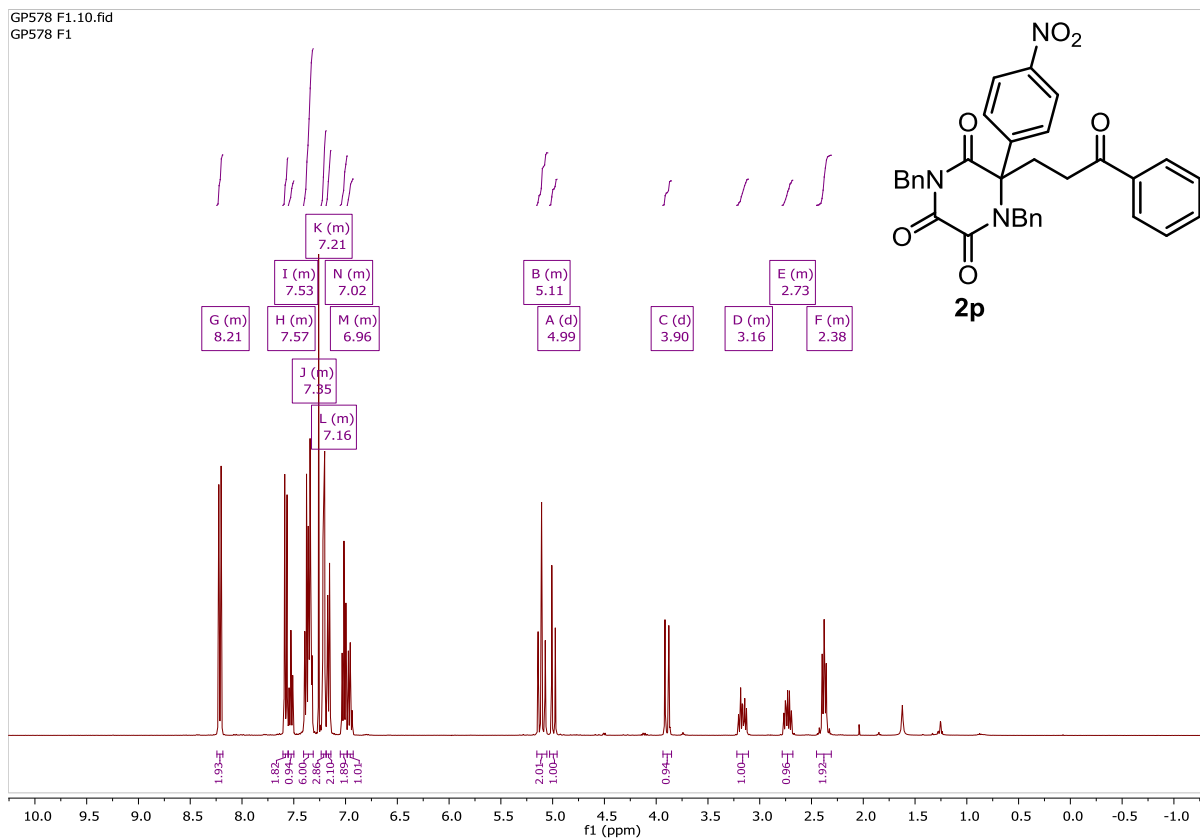

GP578 F1.12.fid  
GP578 F1

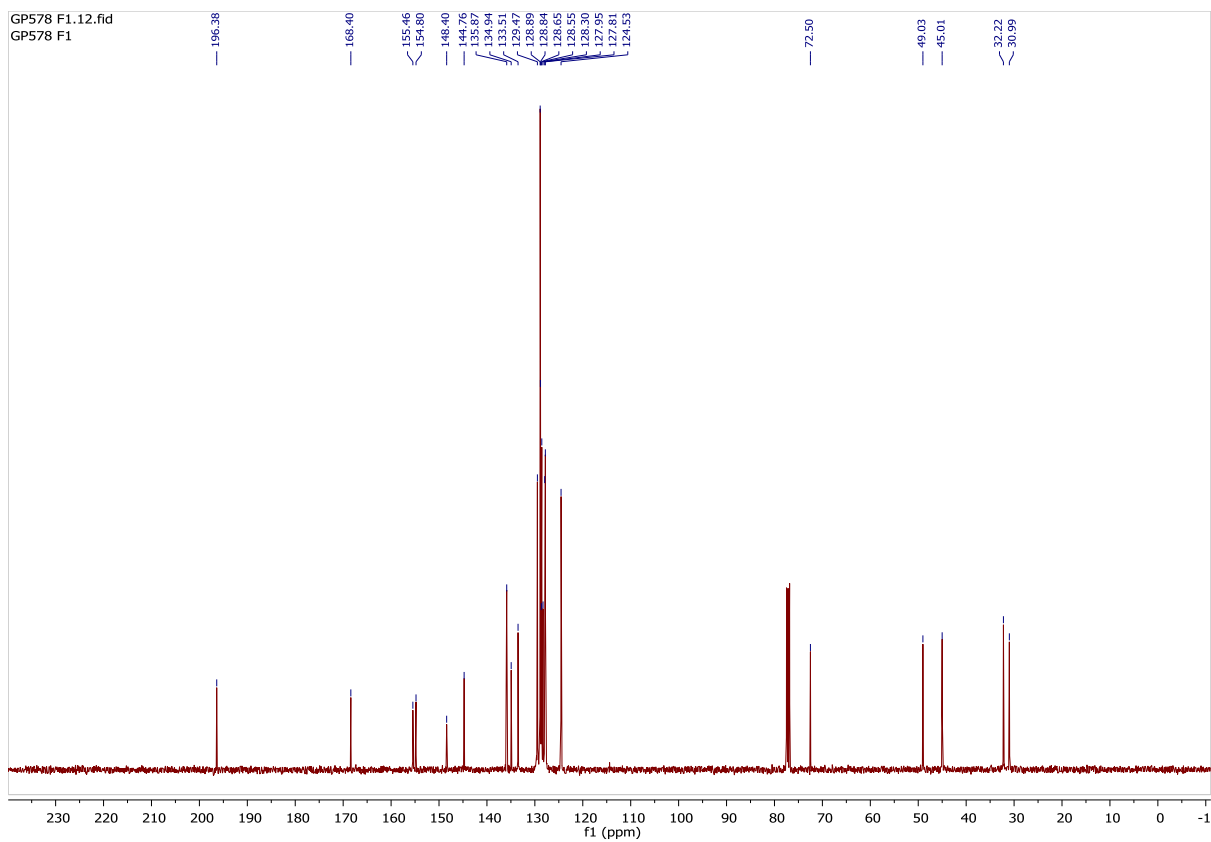

07-02-Simpkins-3.12.fid  
GP135

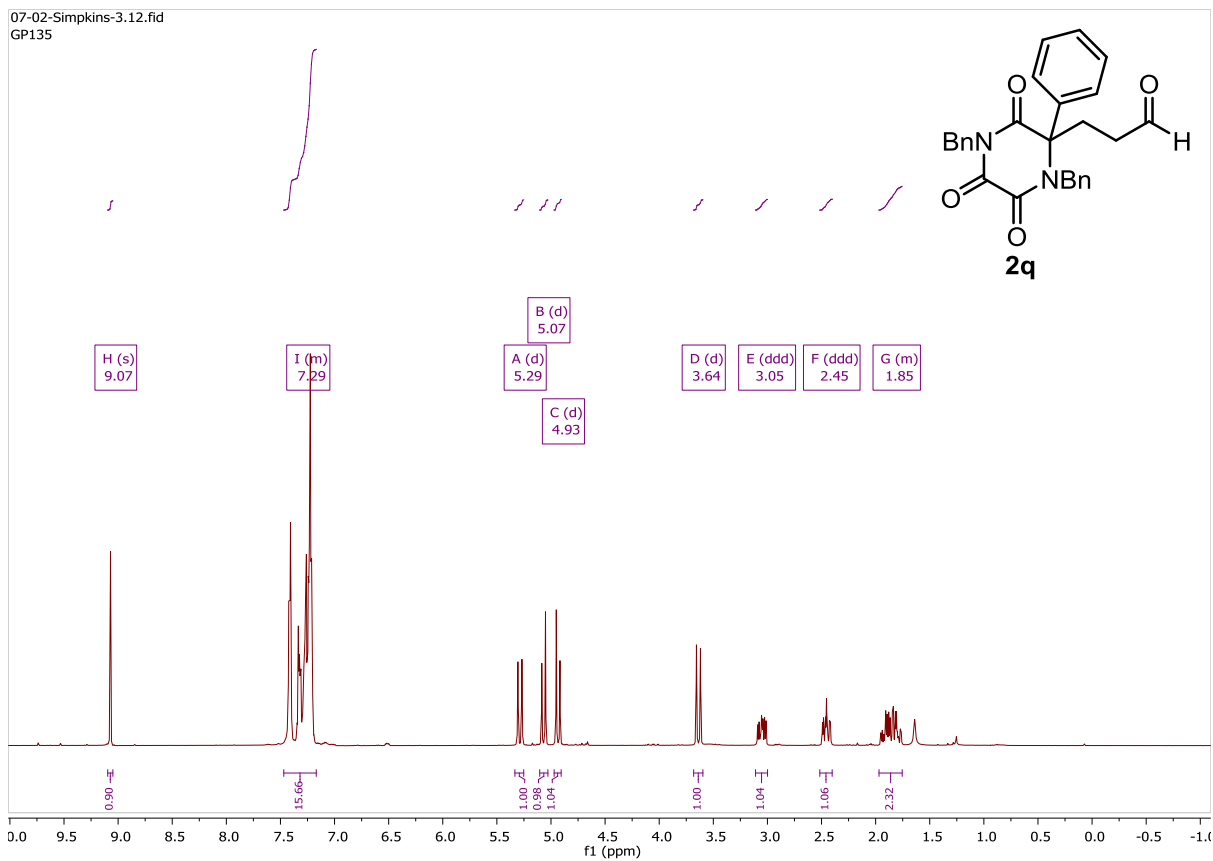

07-02-Simpkins-3.11.fid  
GP135

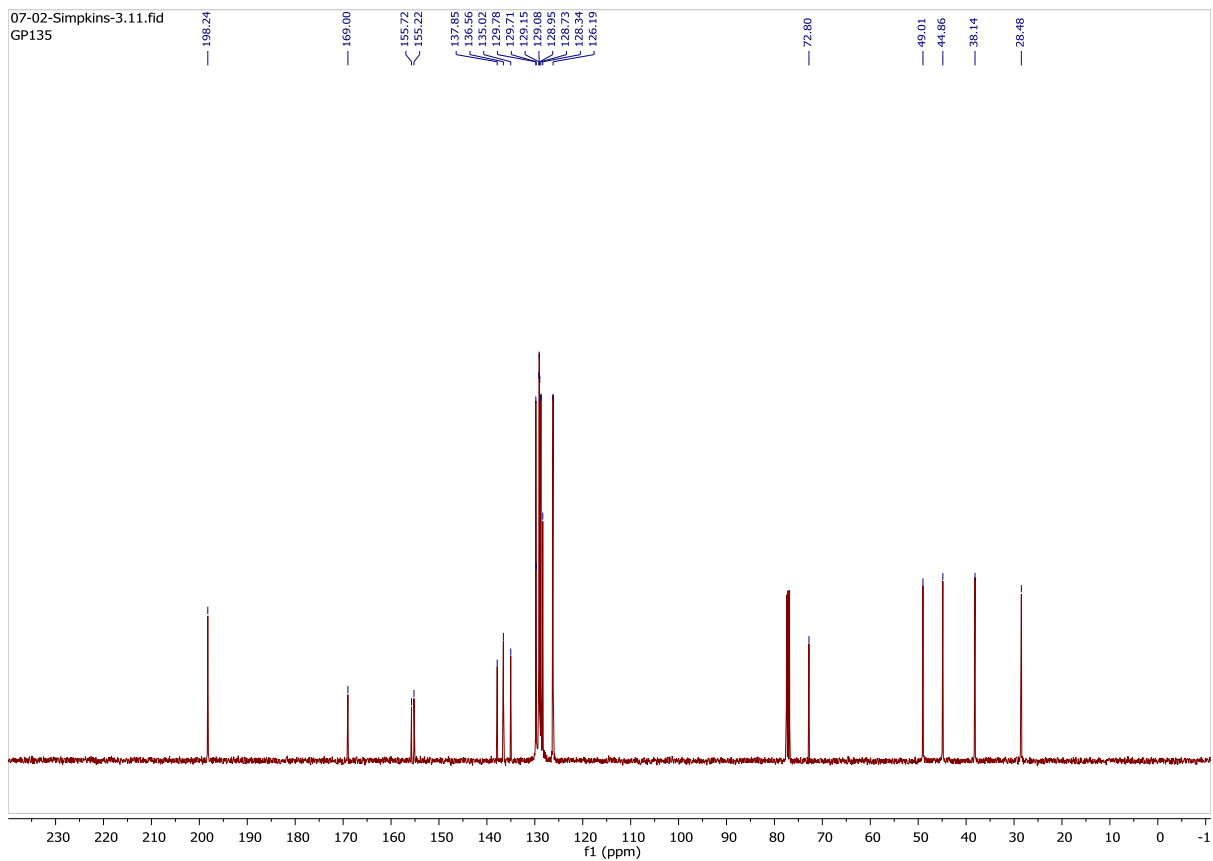

08-01-Simpkins-45.12.fid  
GP173

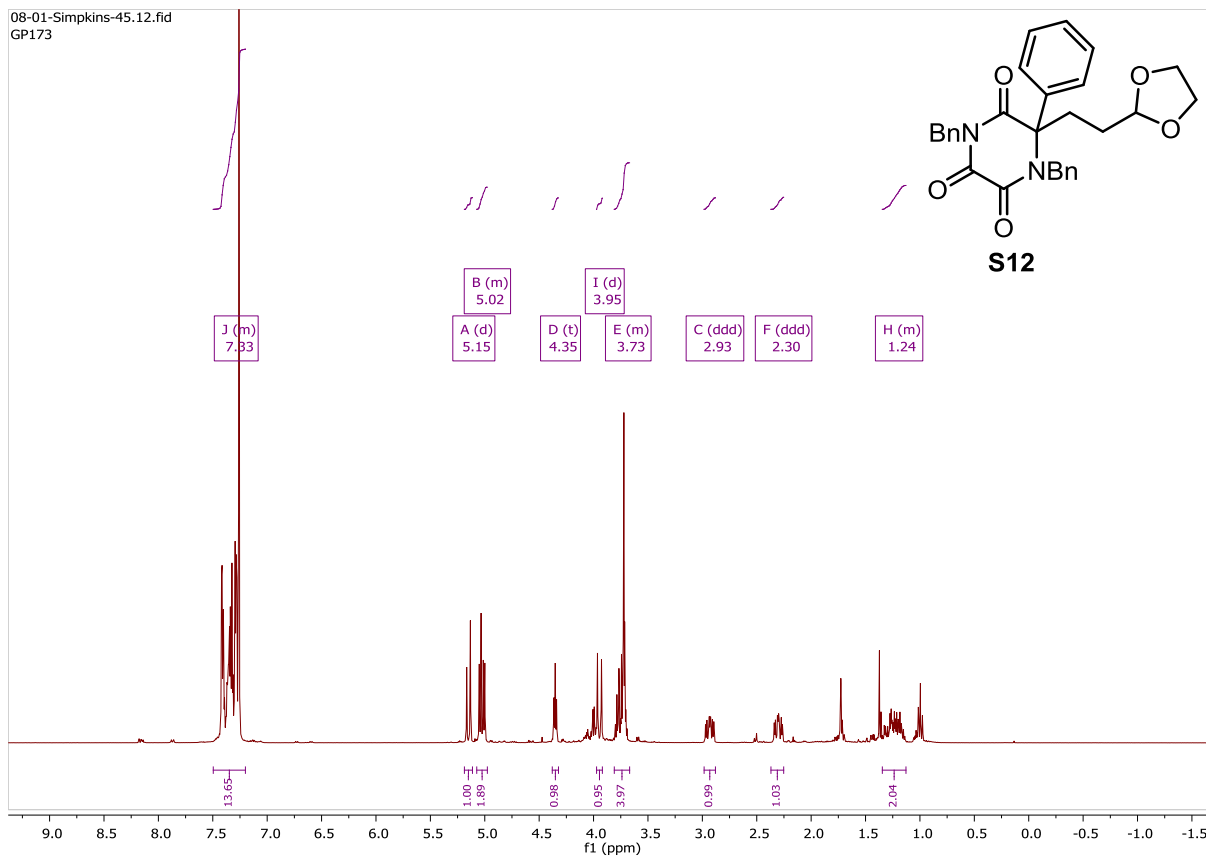

08-01-Simpkins-45.11.fid  
GP173

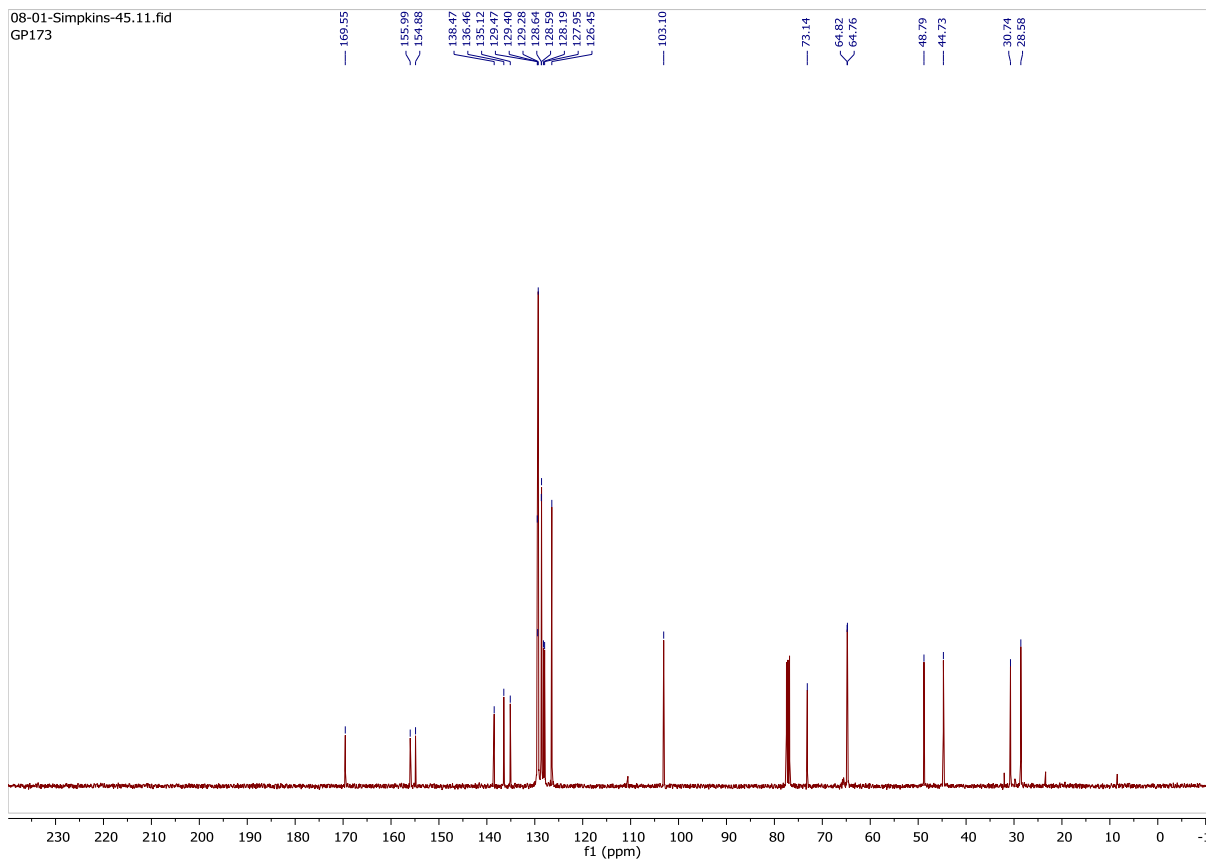

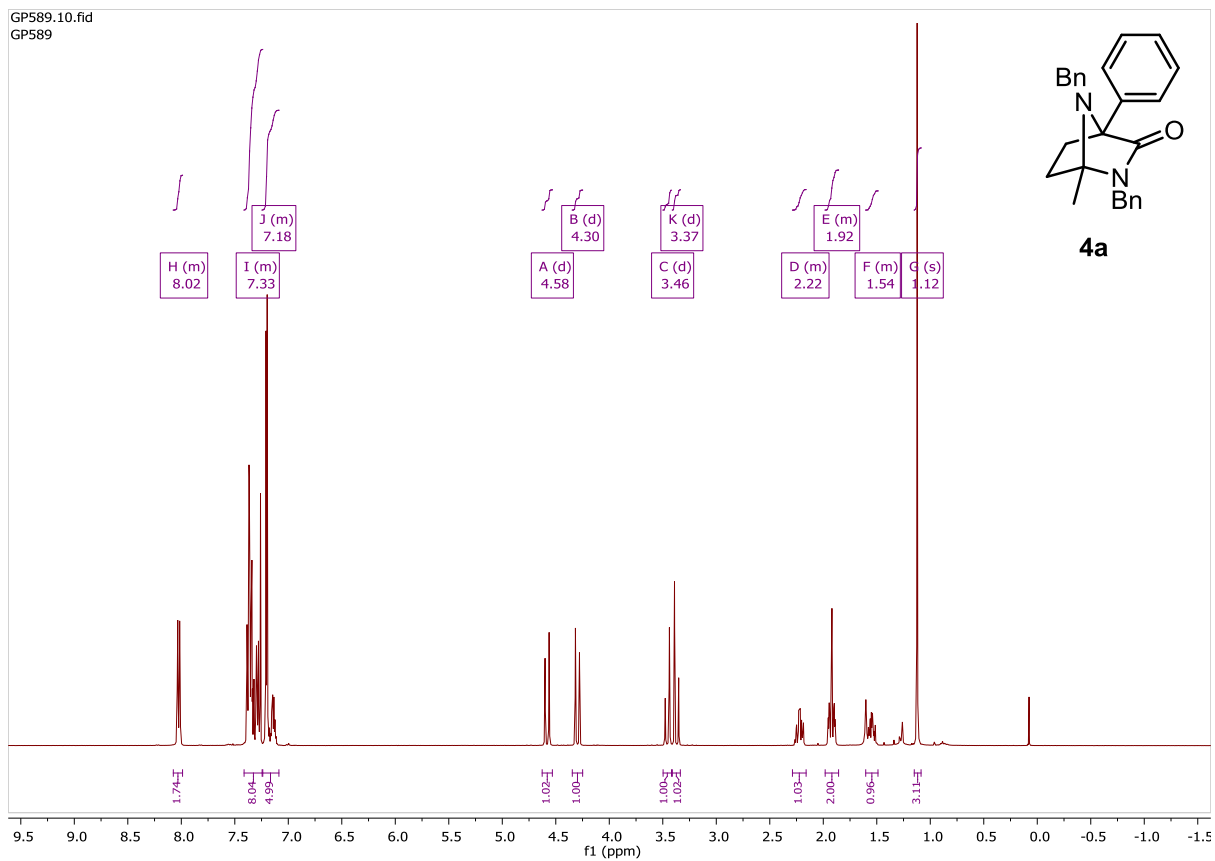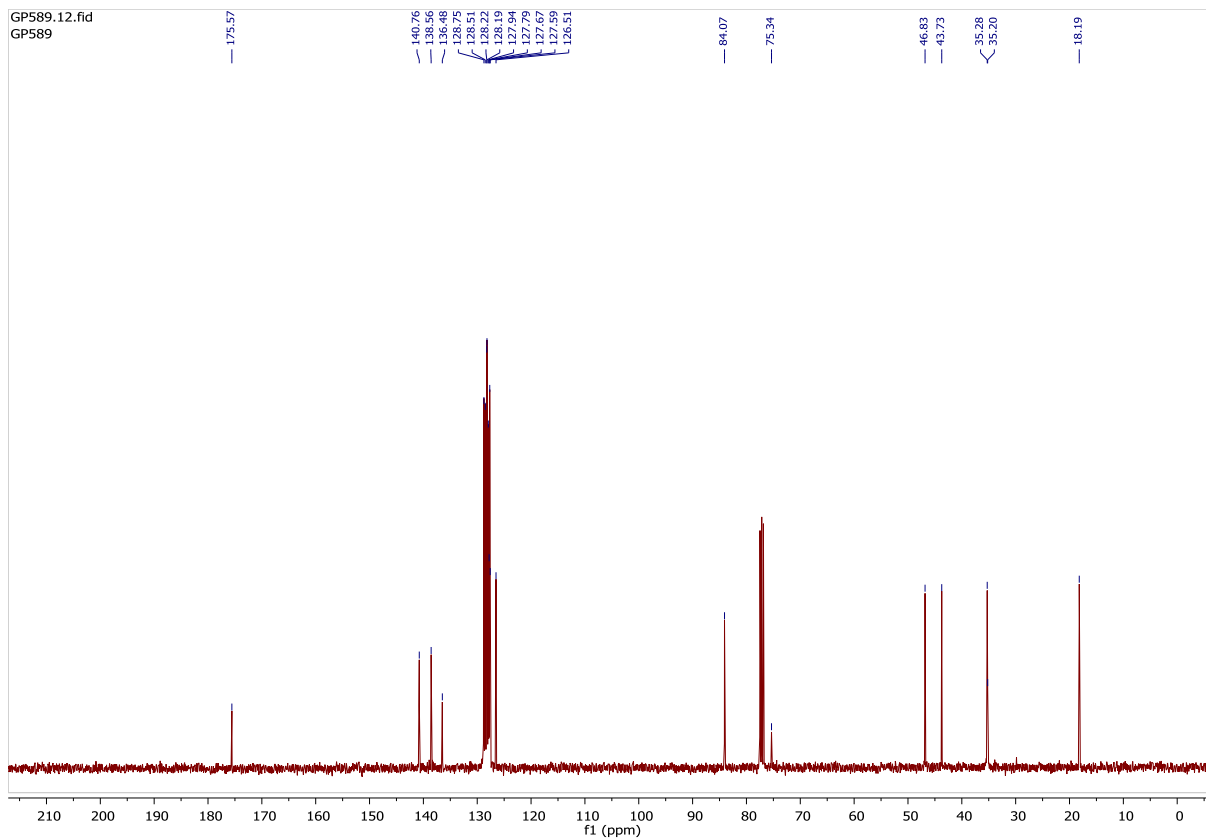

GP613.10.fid  
GP613

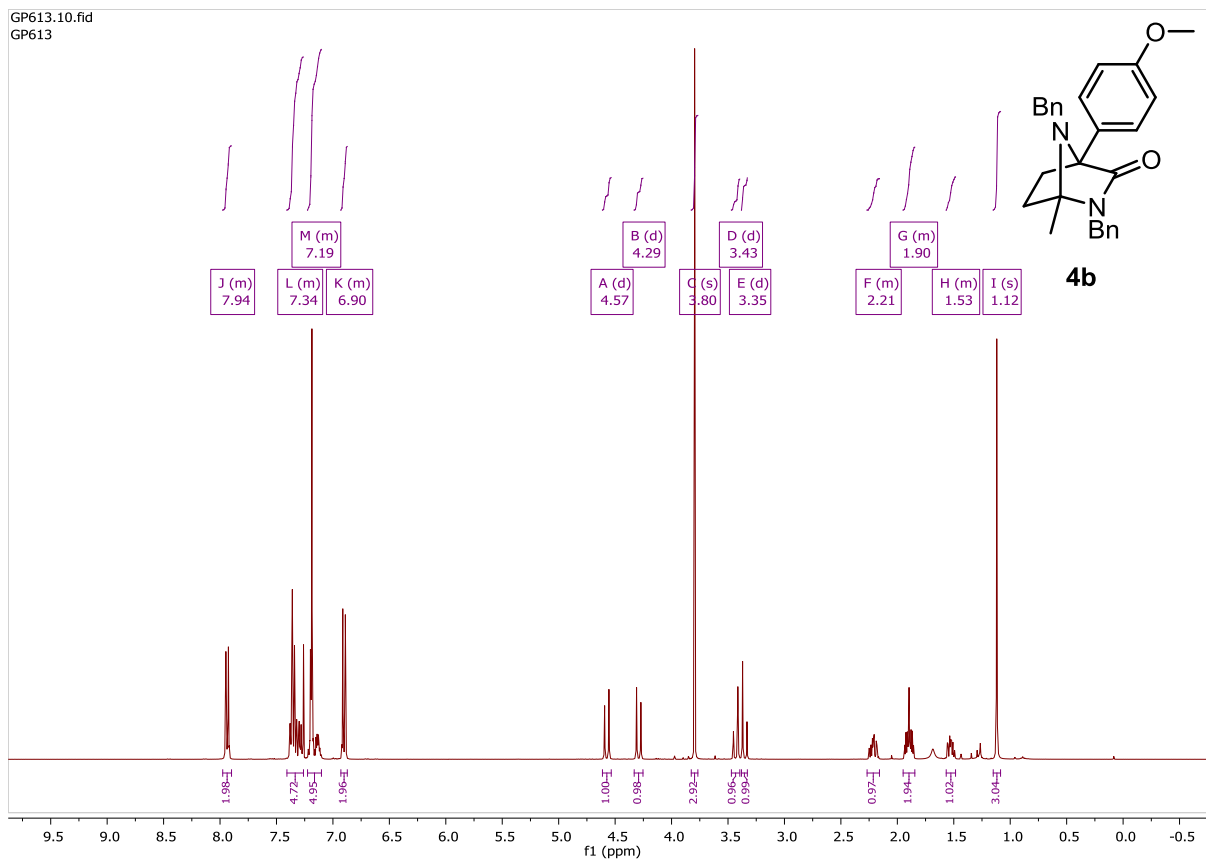

GP613.12.fid  
GP613

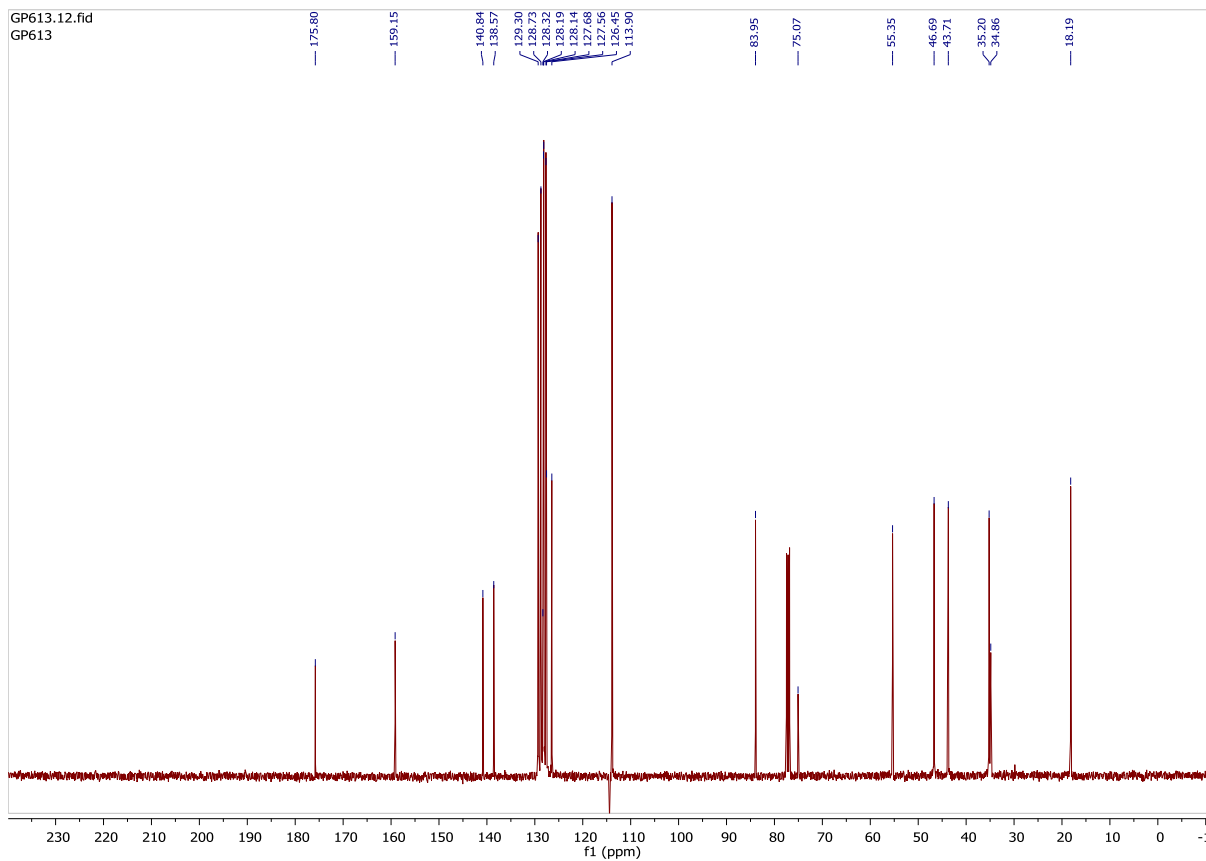

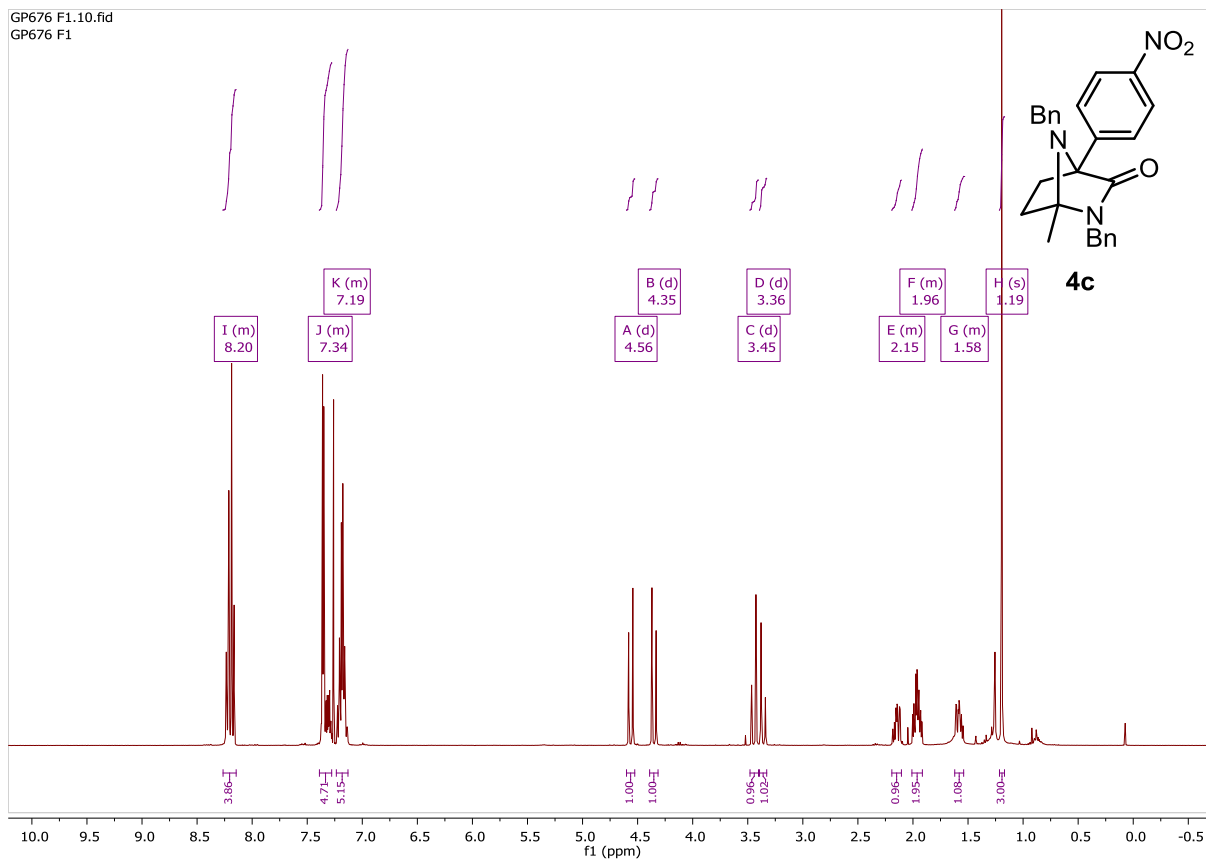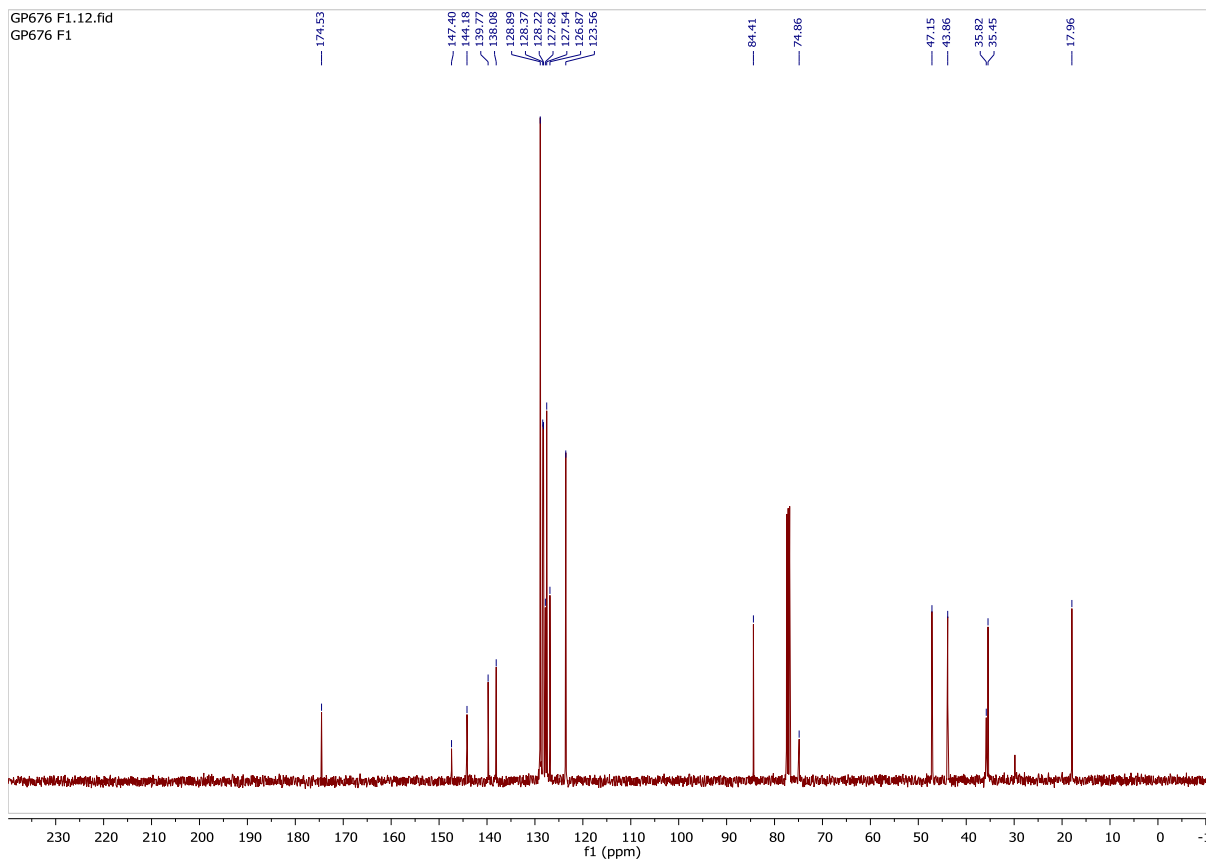

GP664 F1.10.fid  
GP664 F1

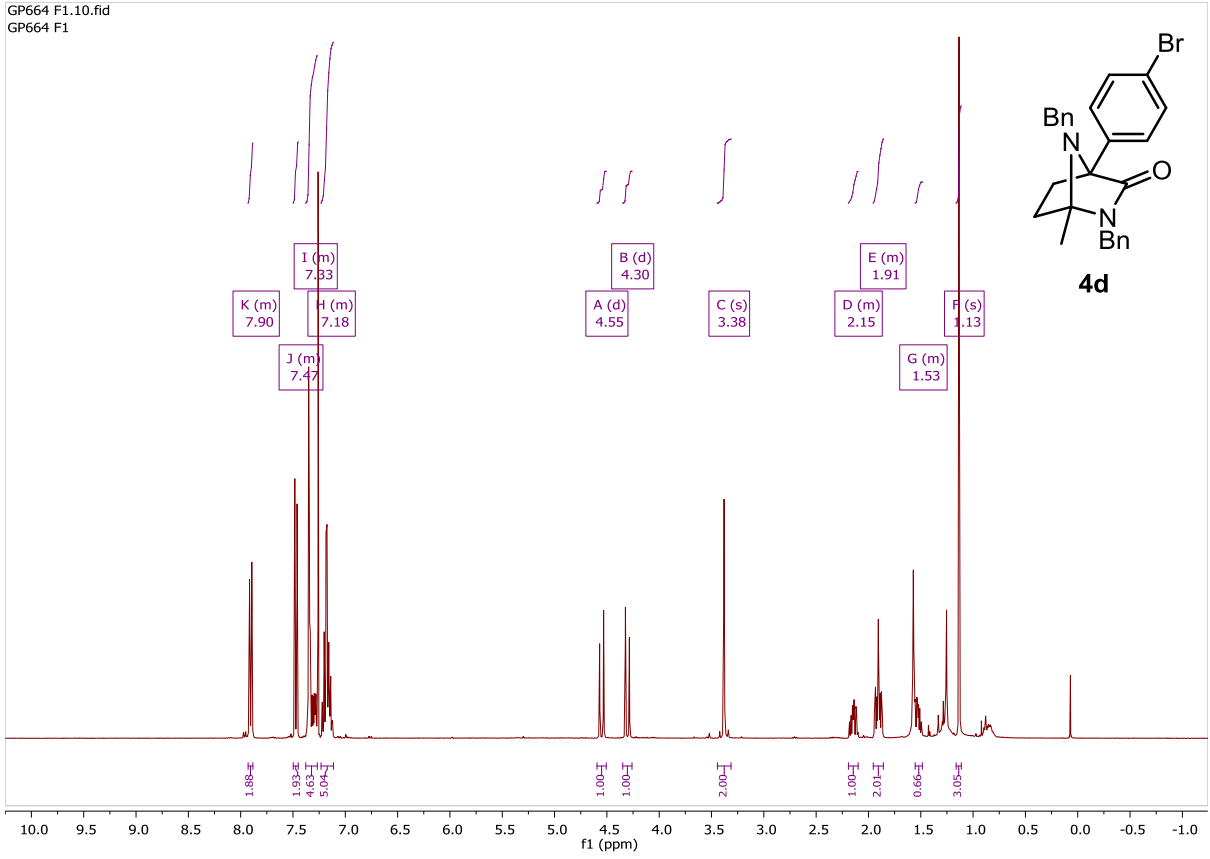

GP664 F1.12.fid  
GP664 F1

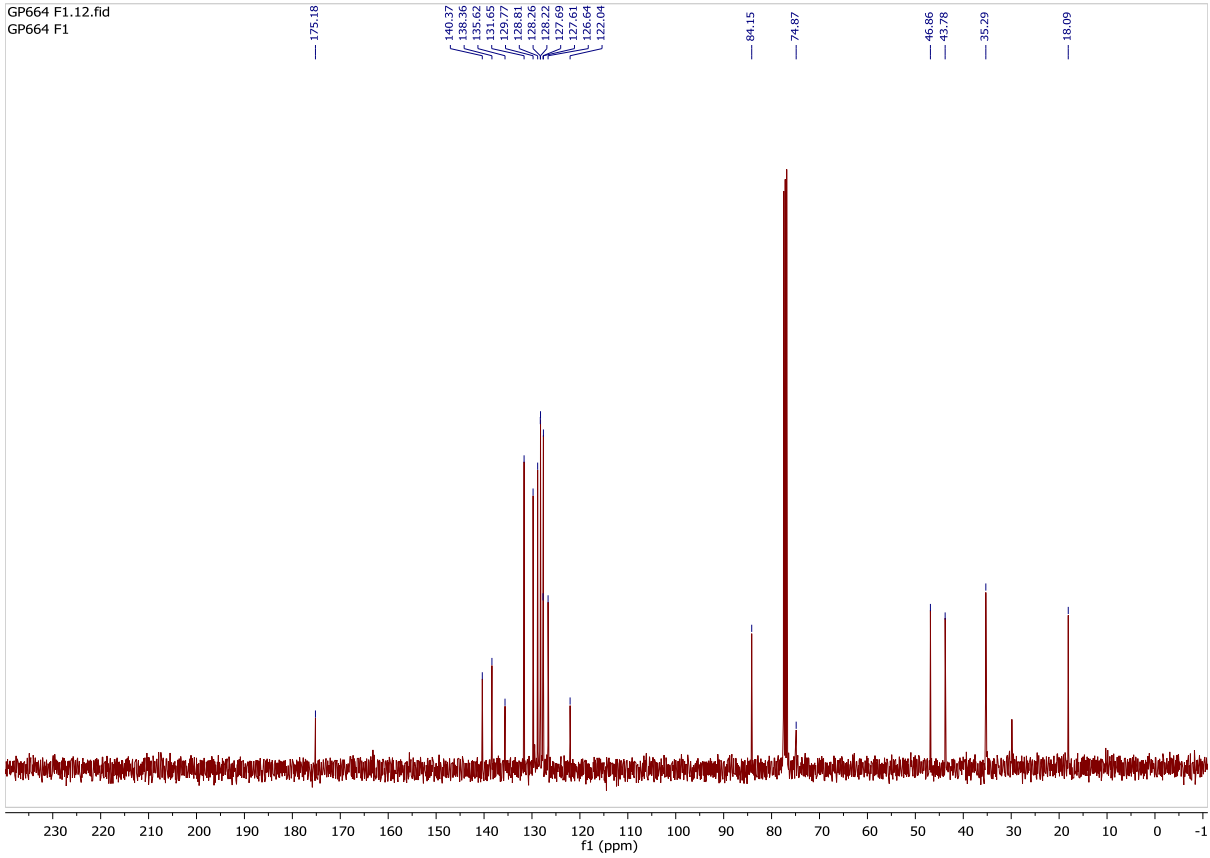



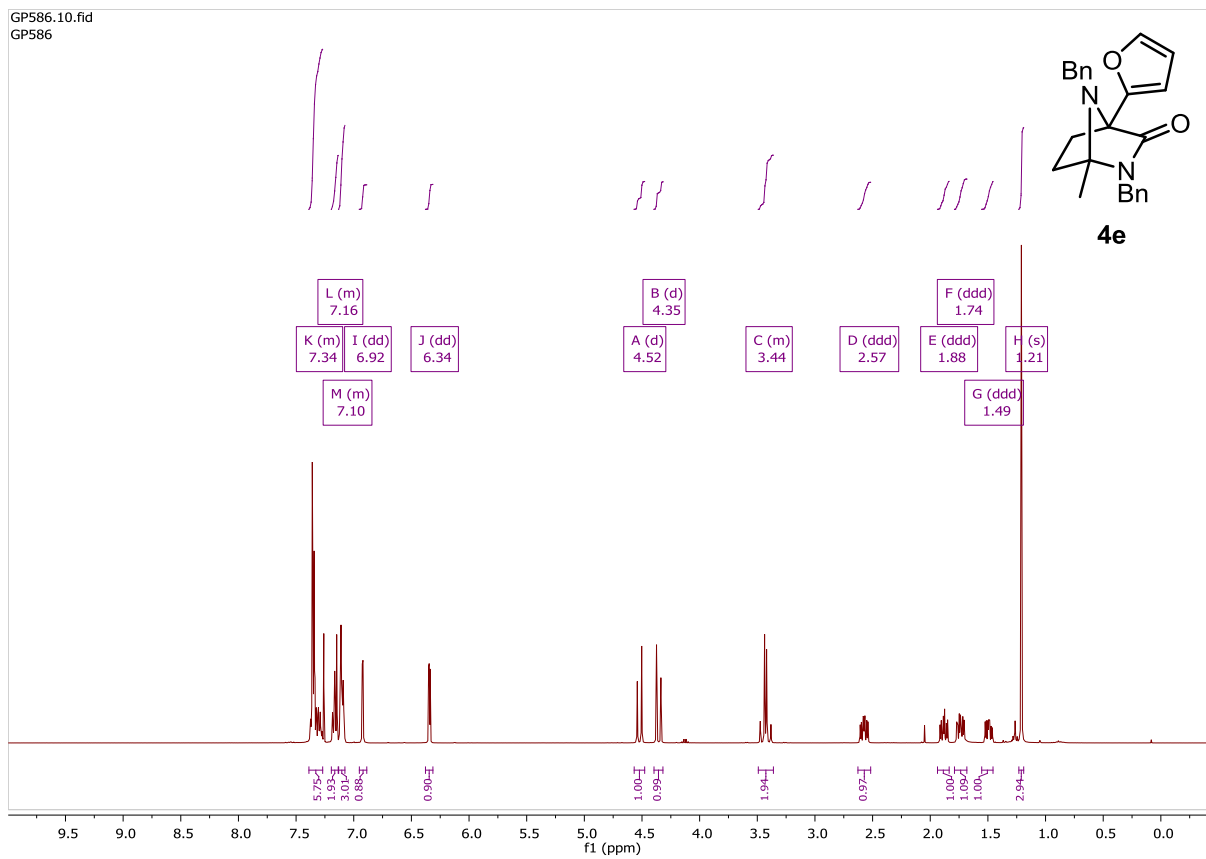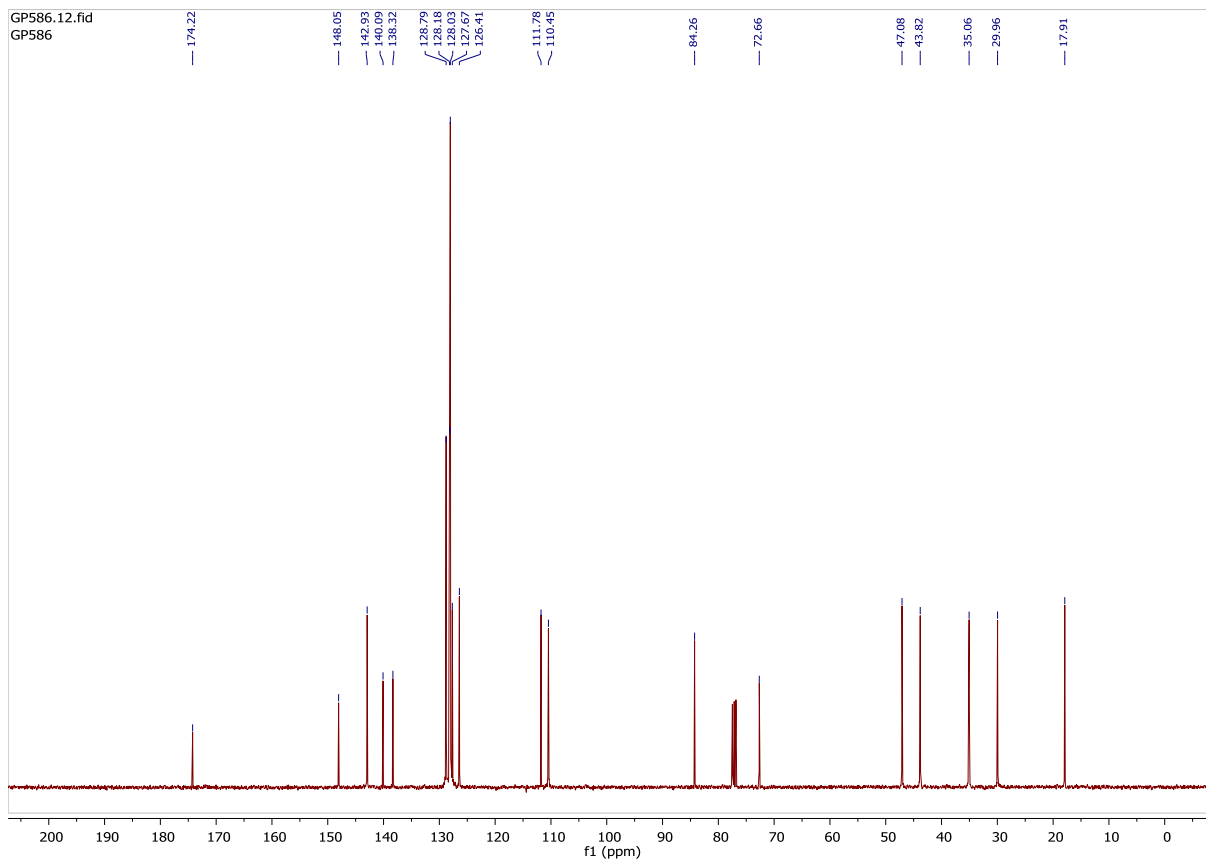

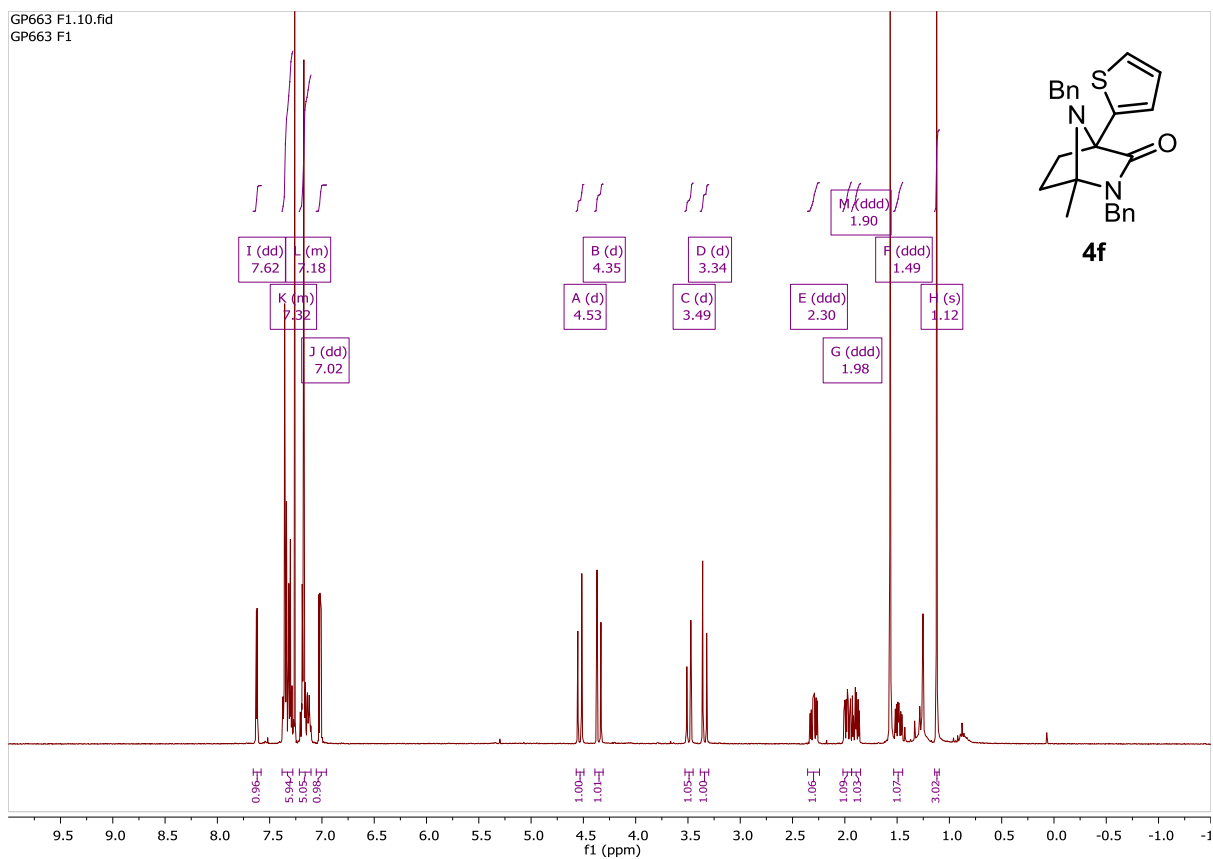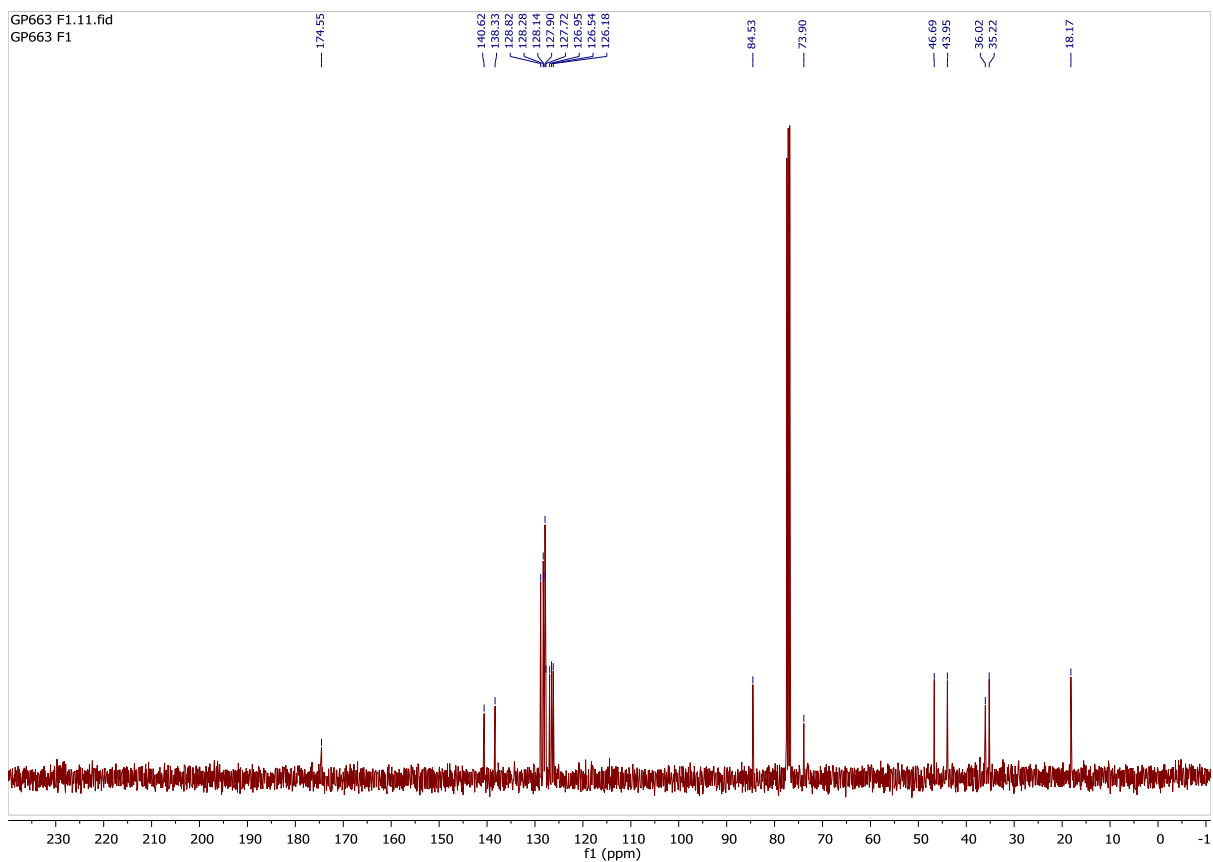

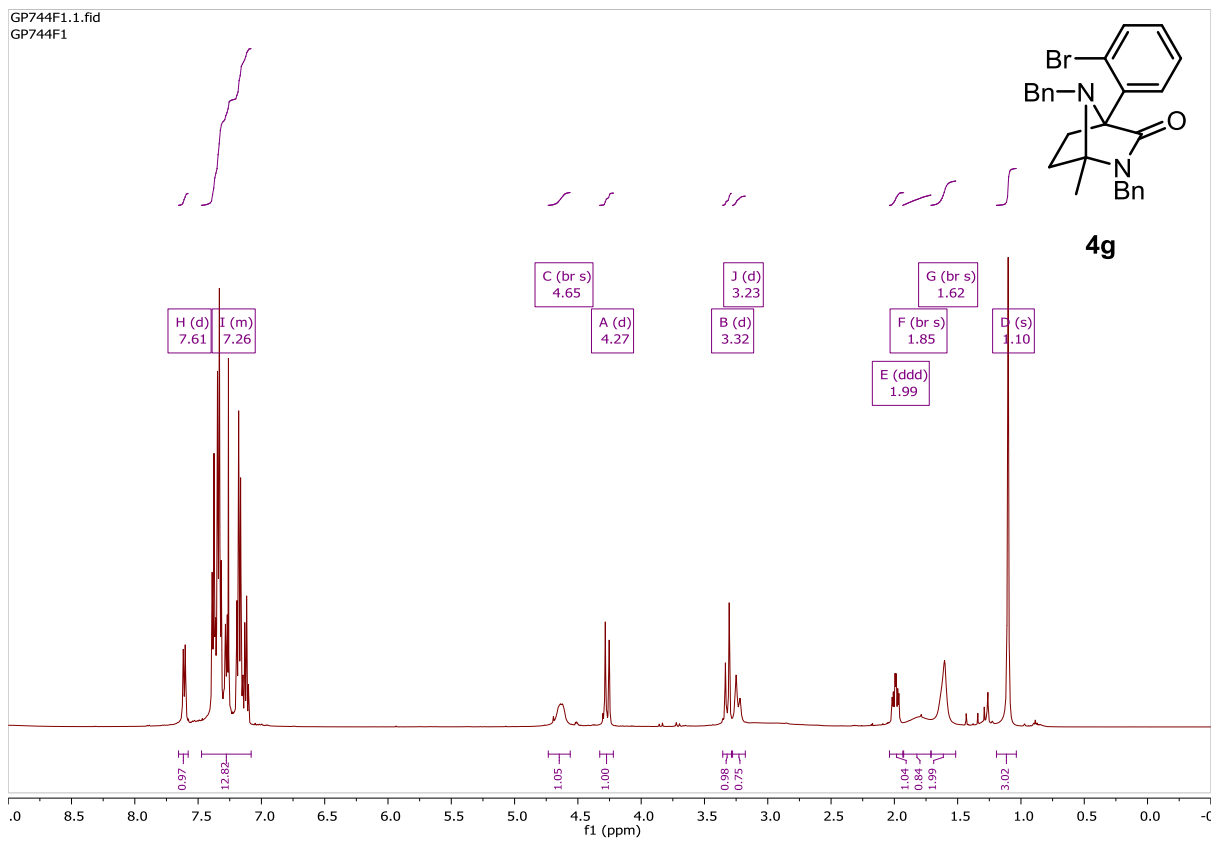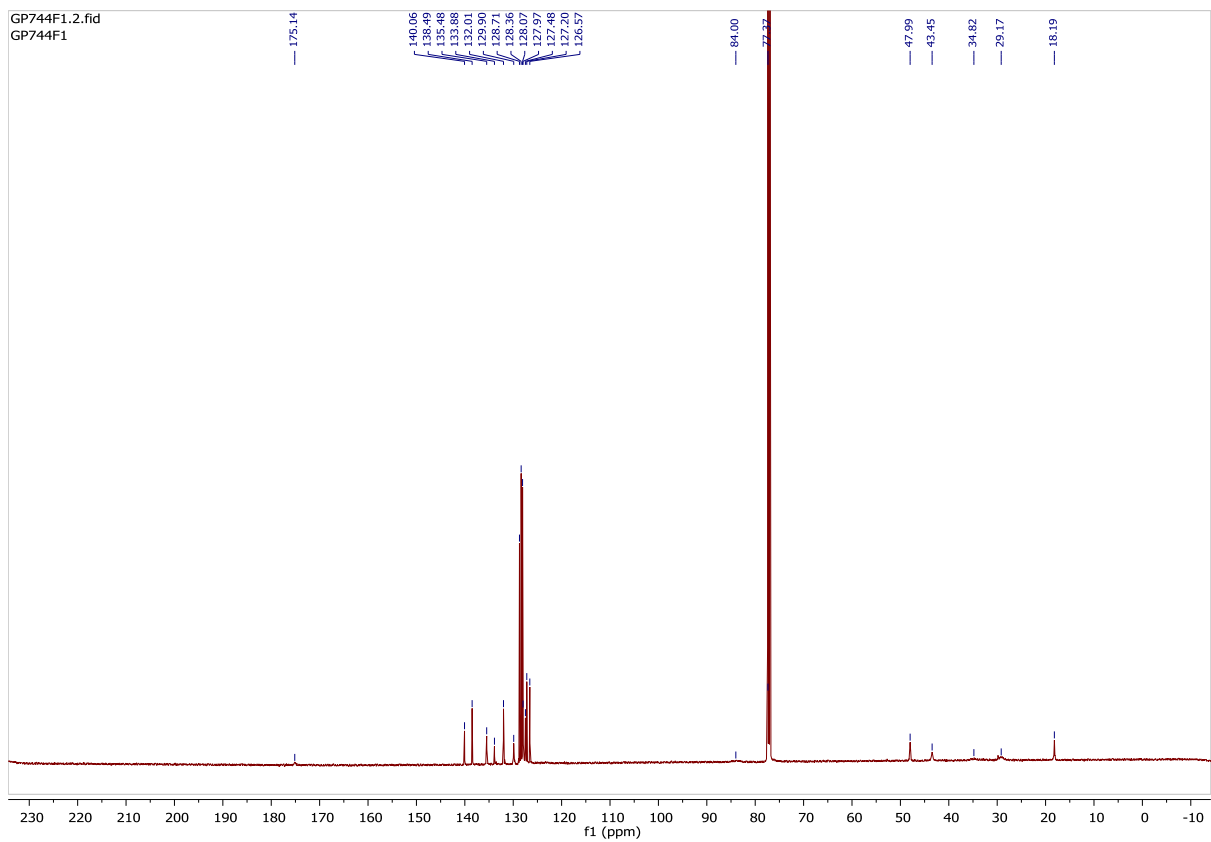

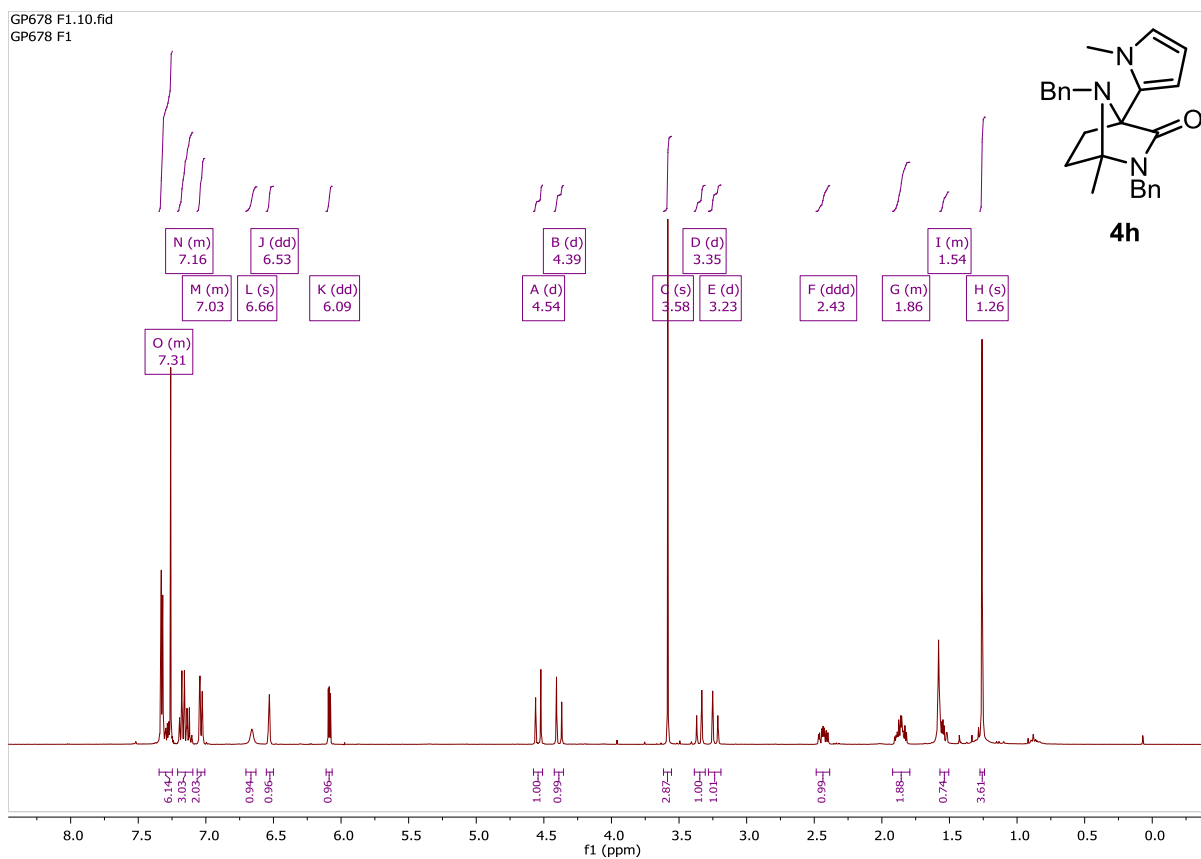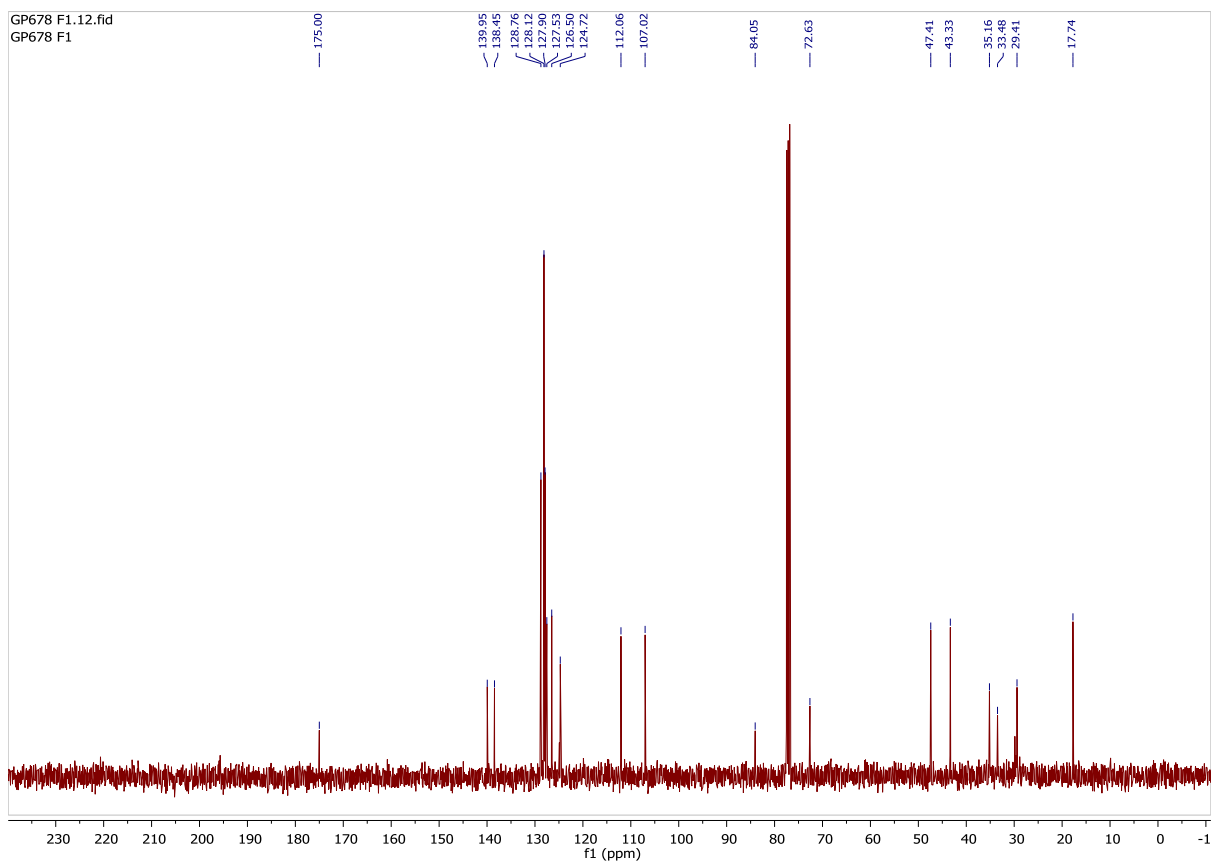

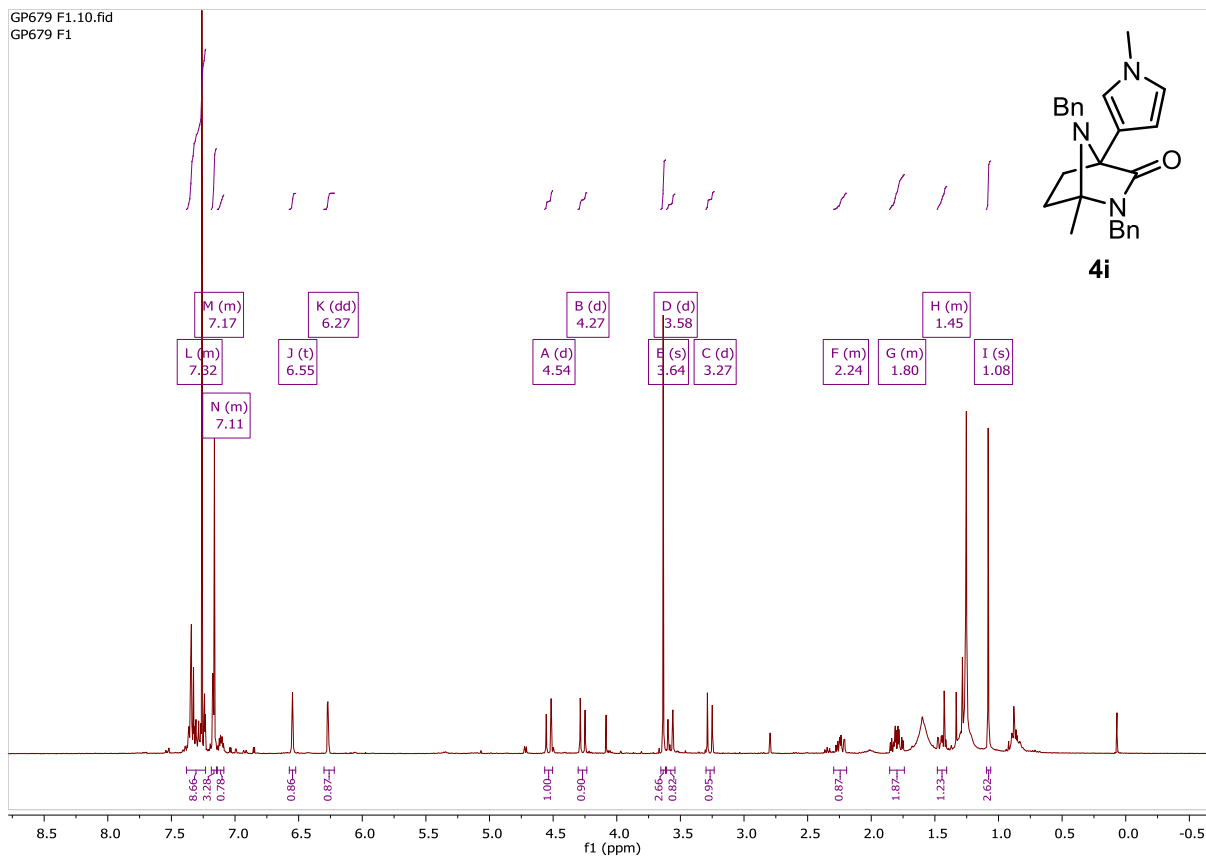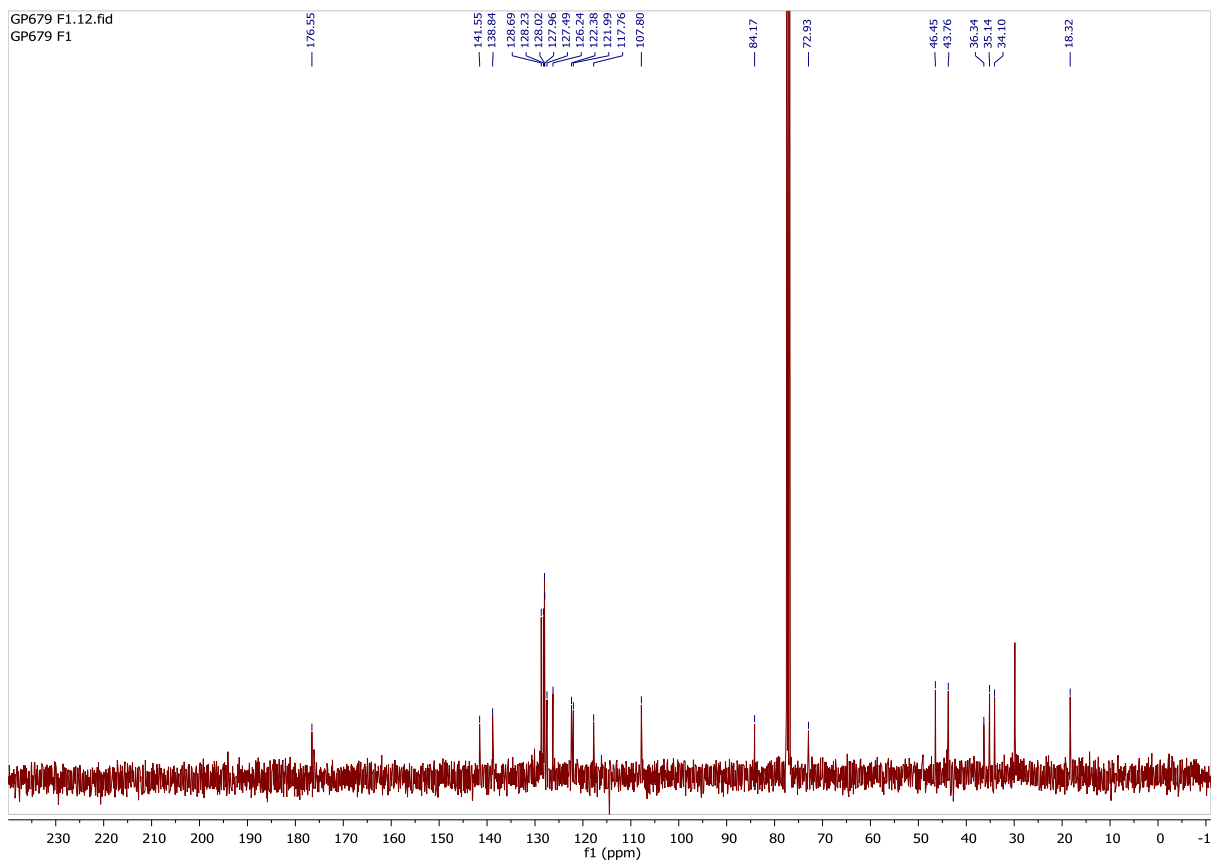

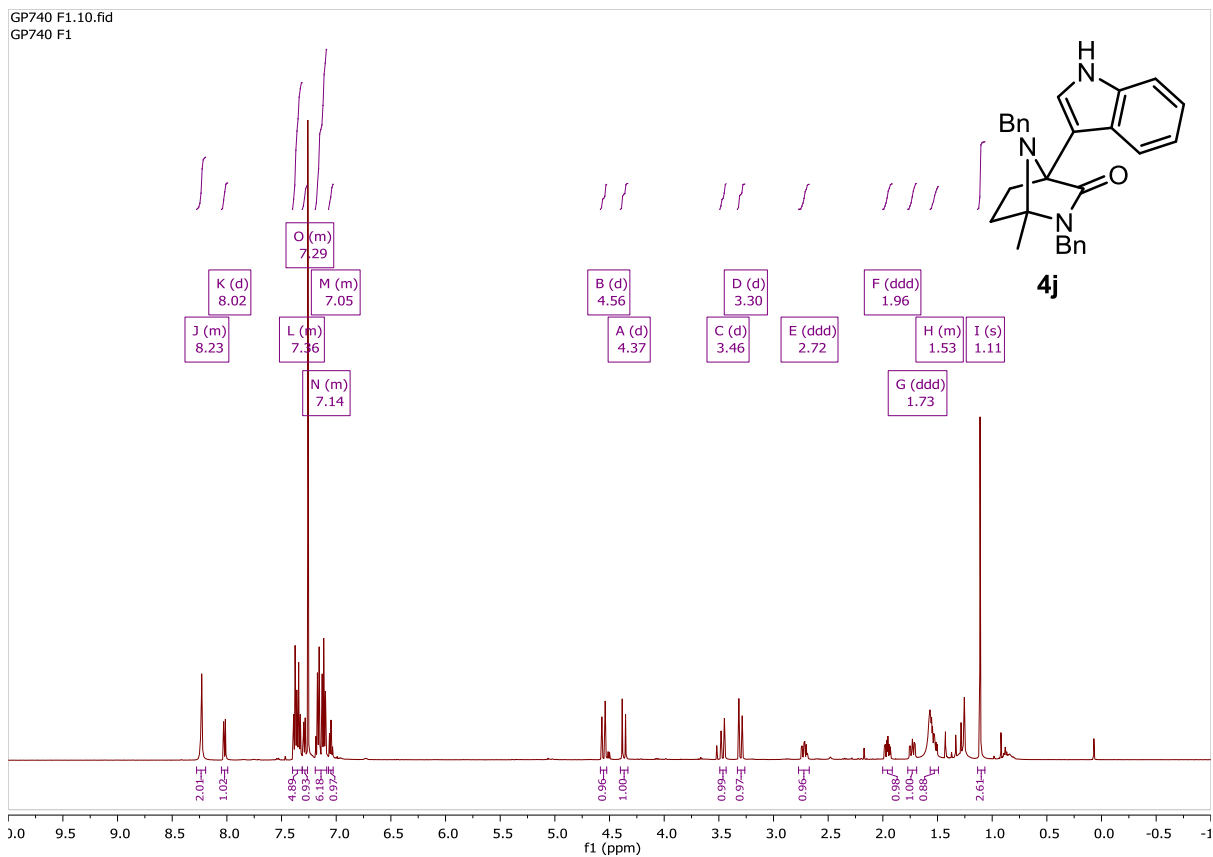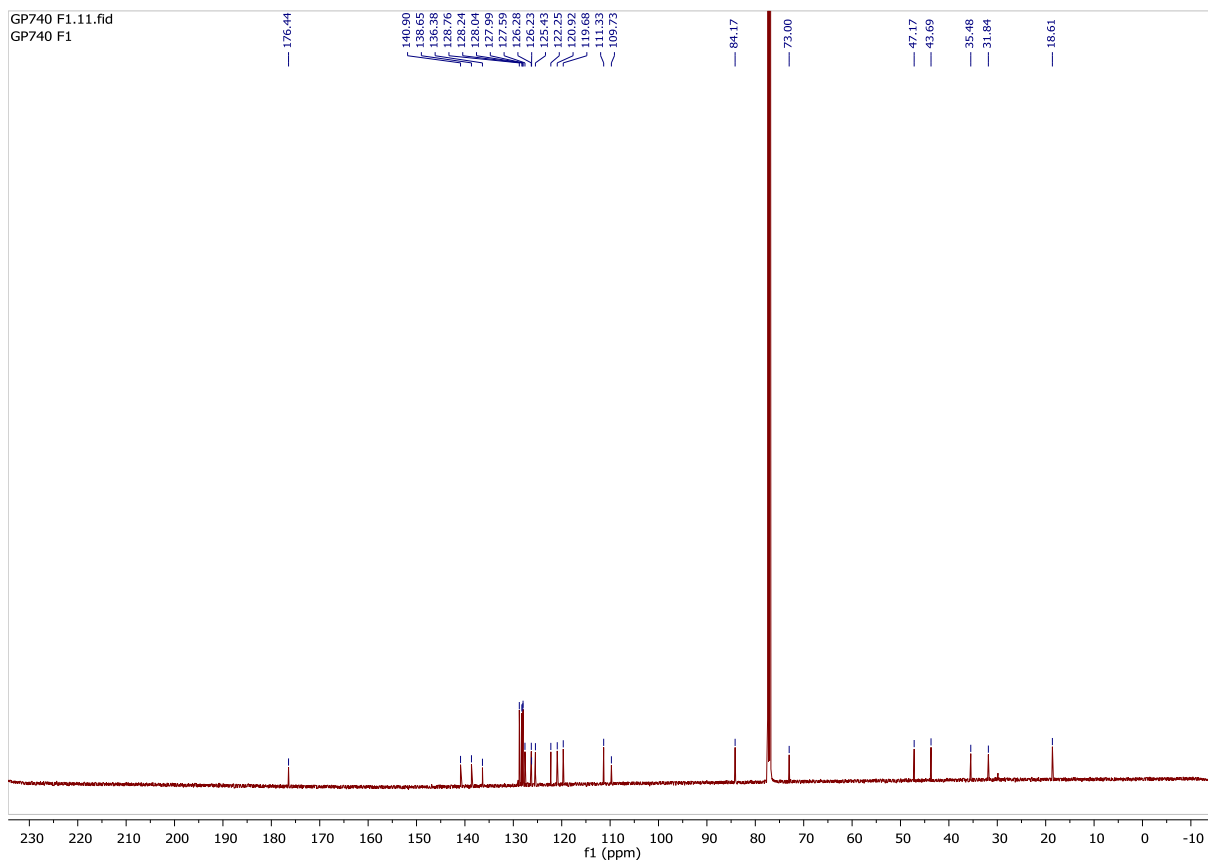

GP687 F1.10.fid  
GP687 F1

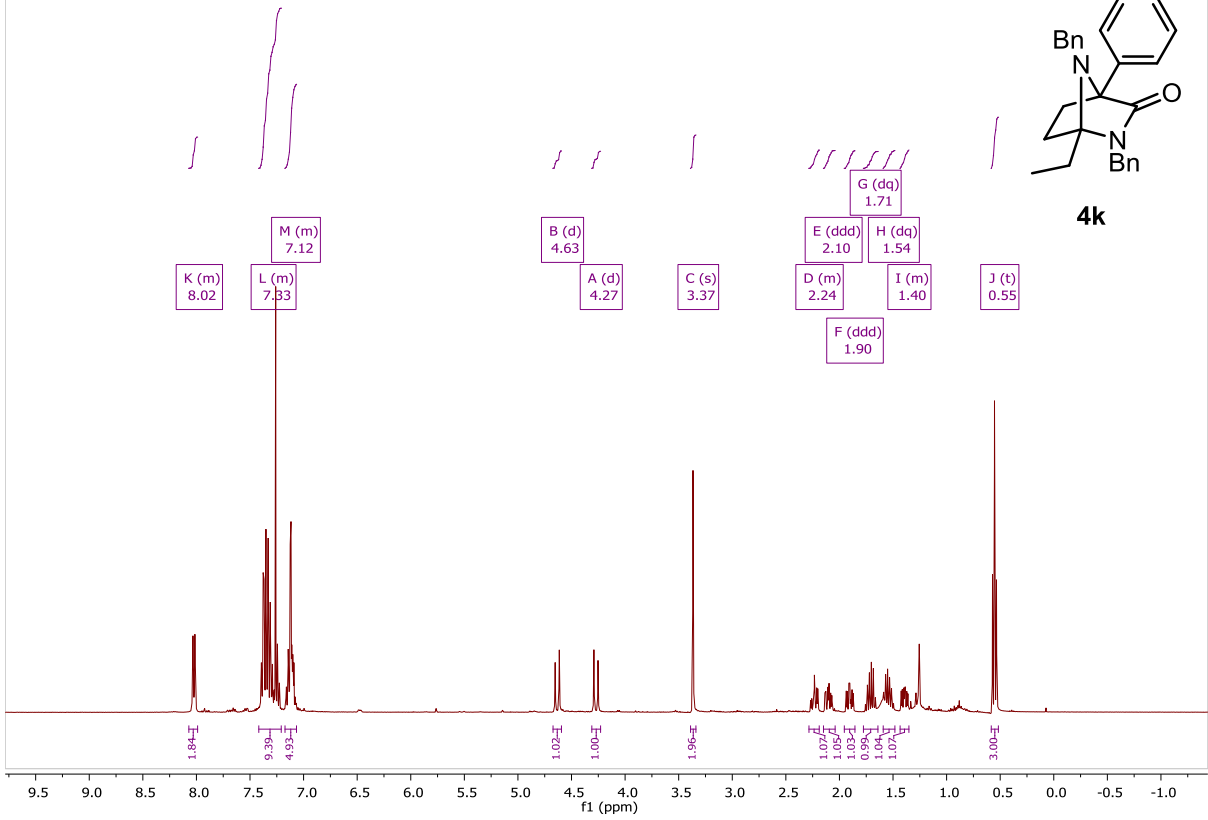

GP687 F1.12.fid  
GP687 F1

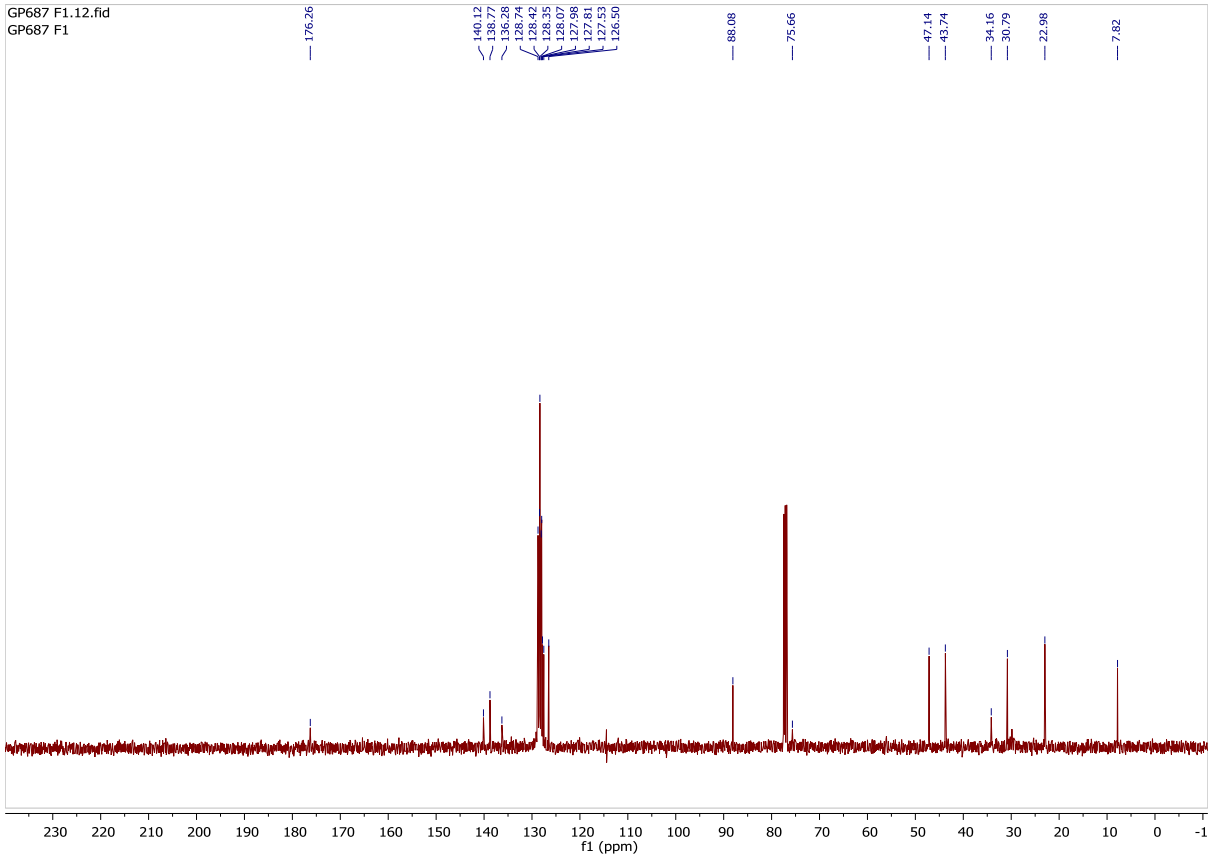

GP688 F1.10.fid  
GP688 F1

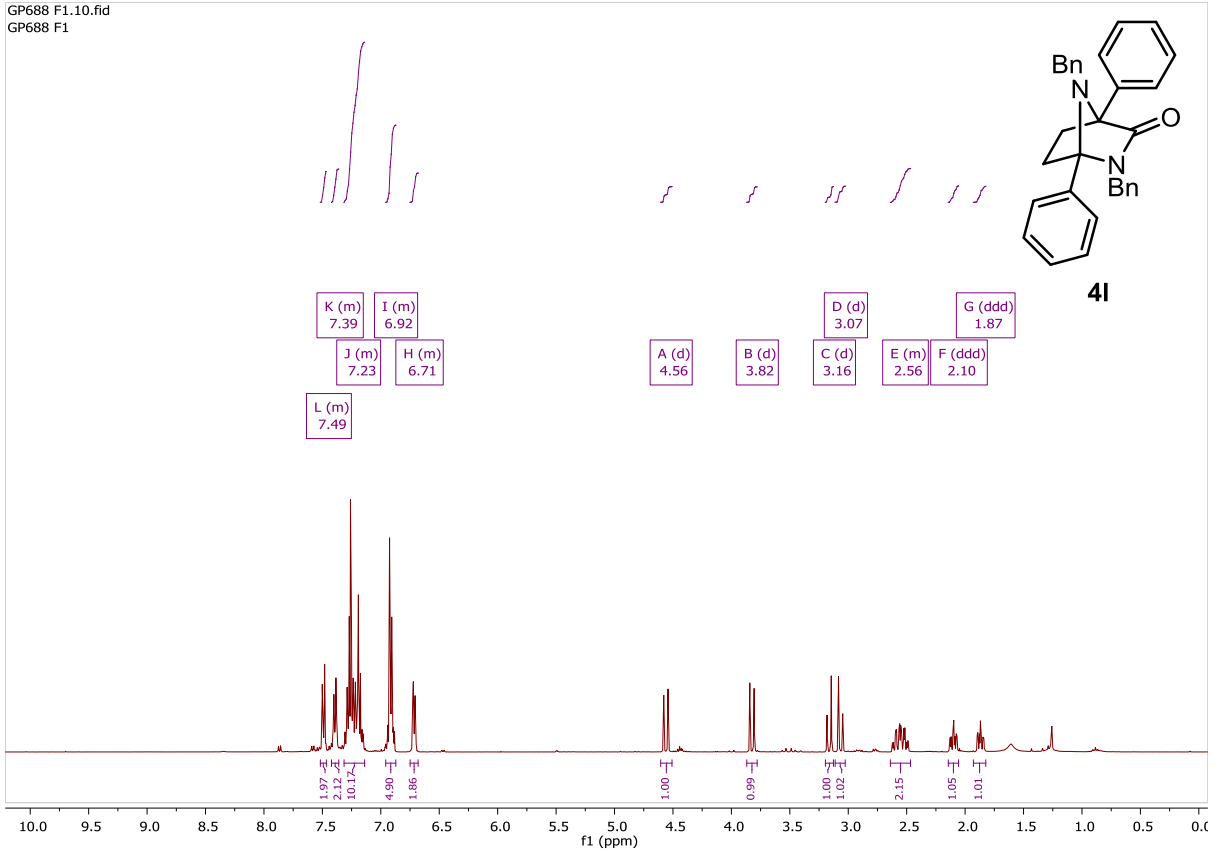

GP688 F1.12.fid  
GP688 F1

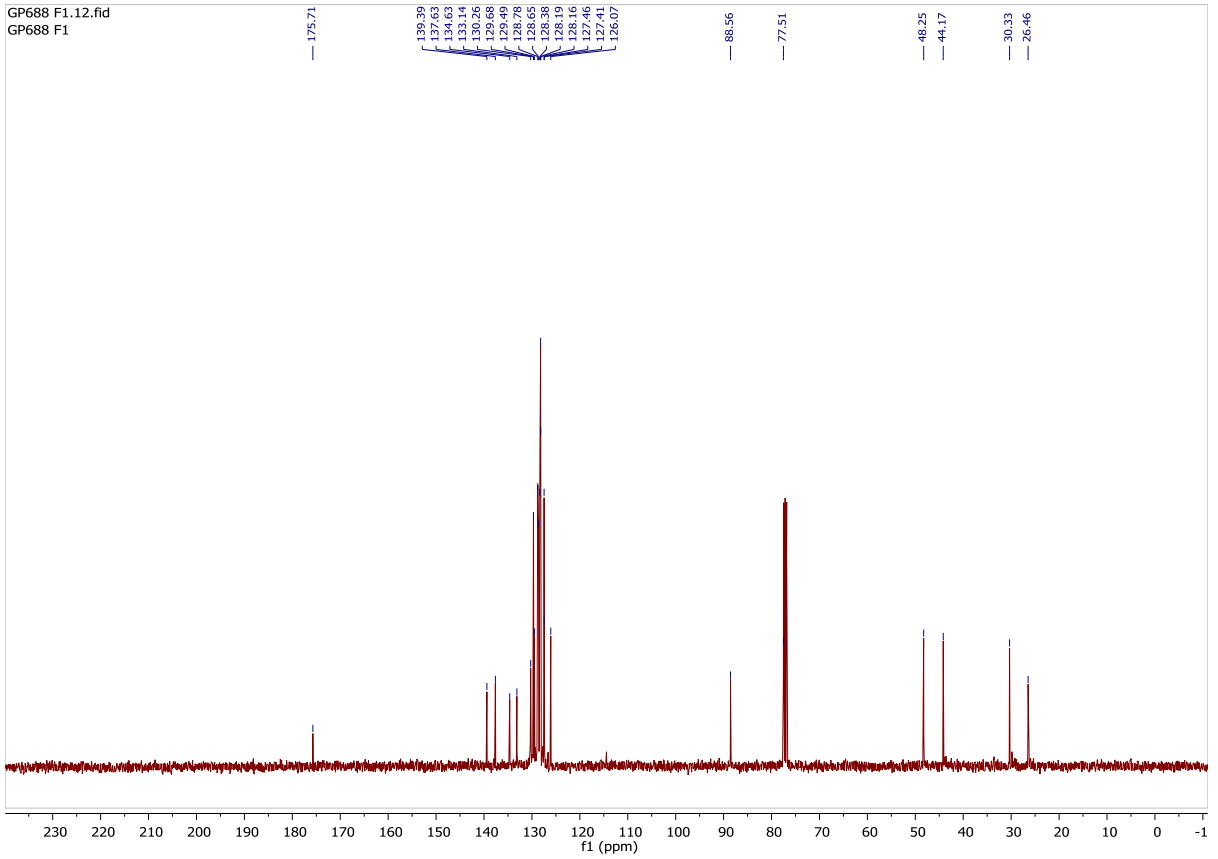



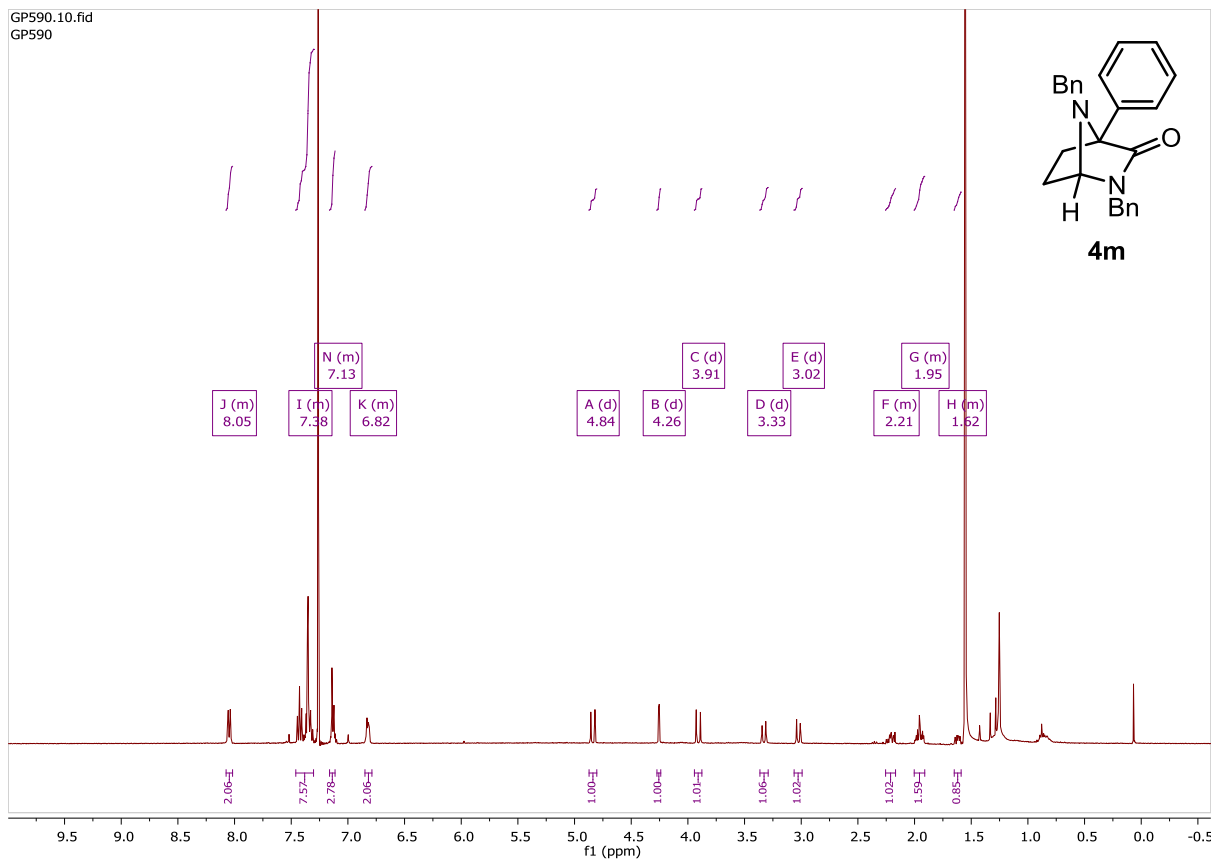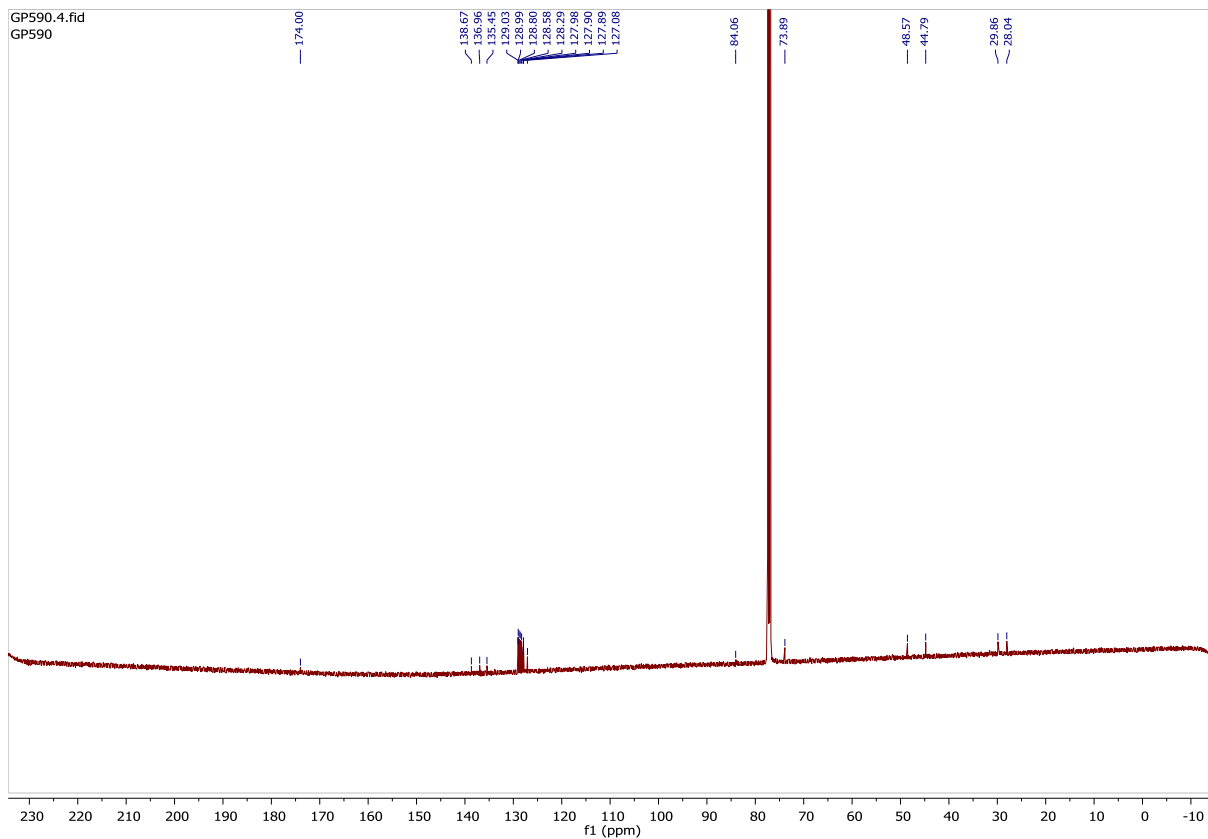

GP662 F2.10.fid  
GP662 F2

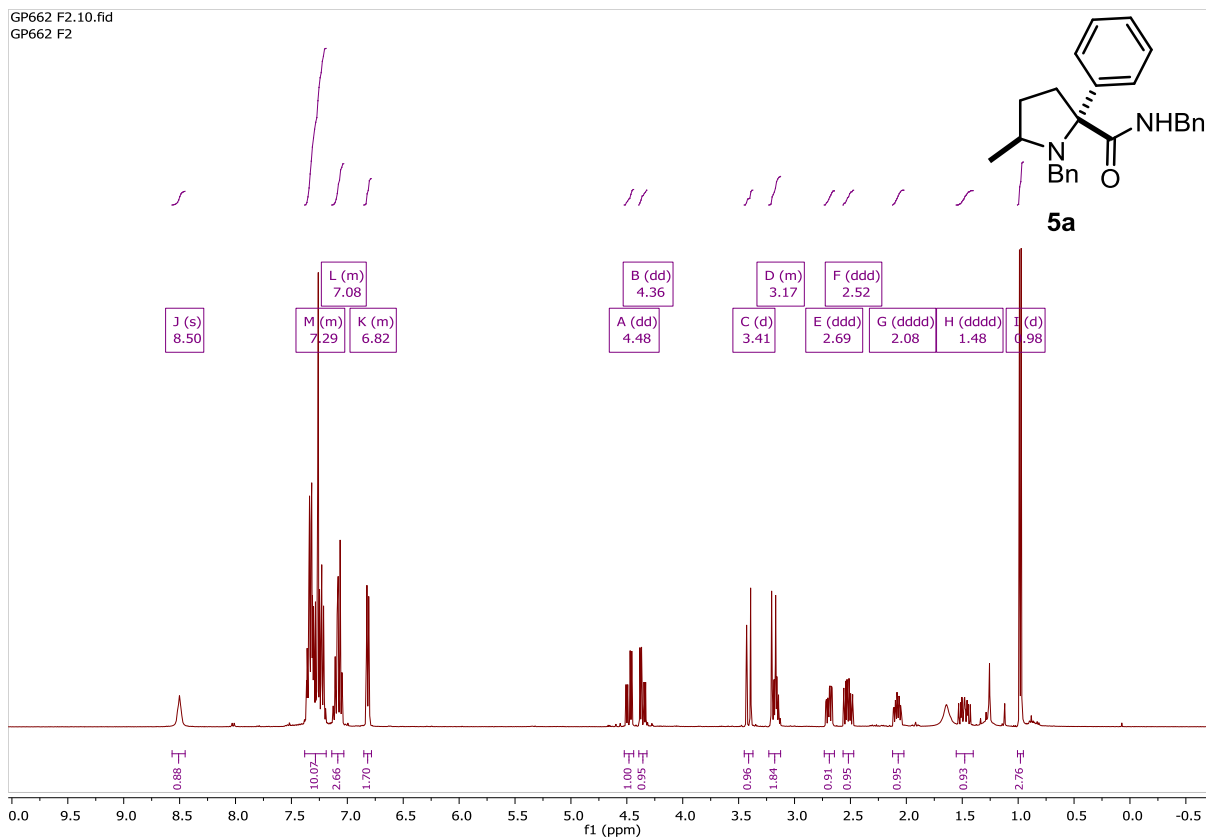

GP662 F2.12.fid  
GP662 F2

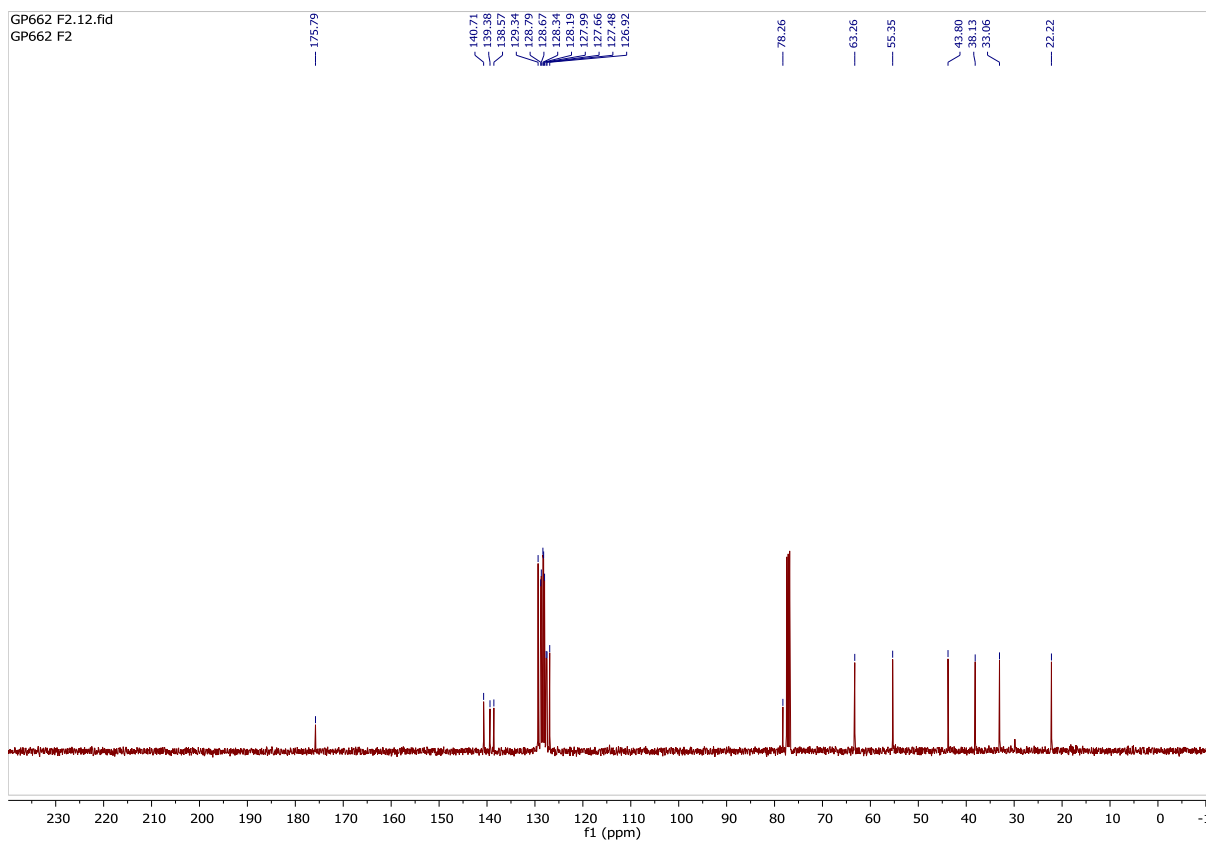

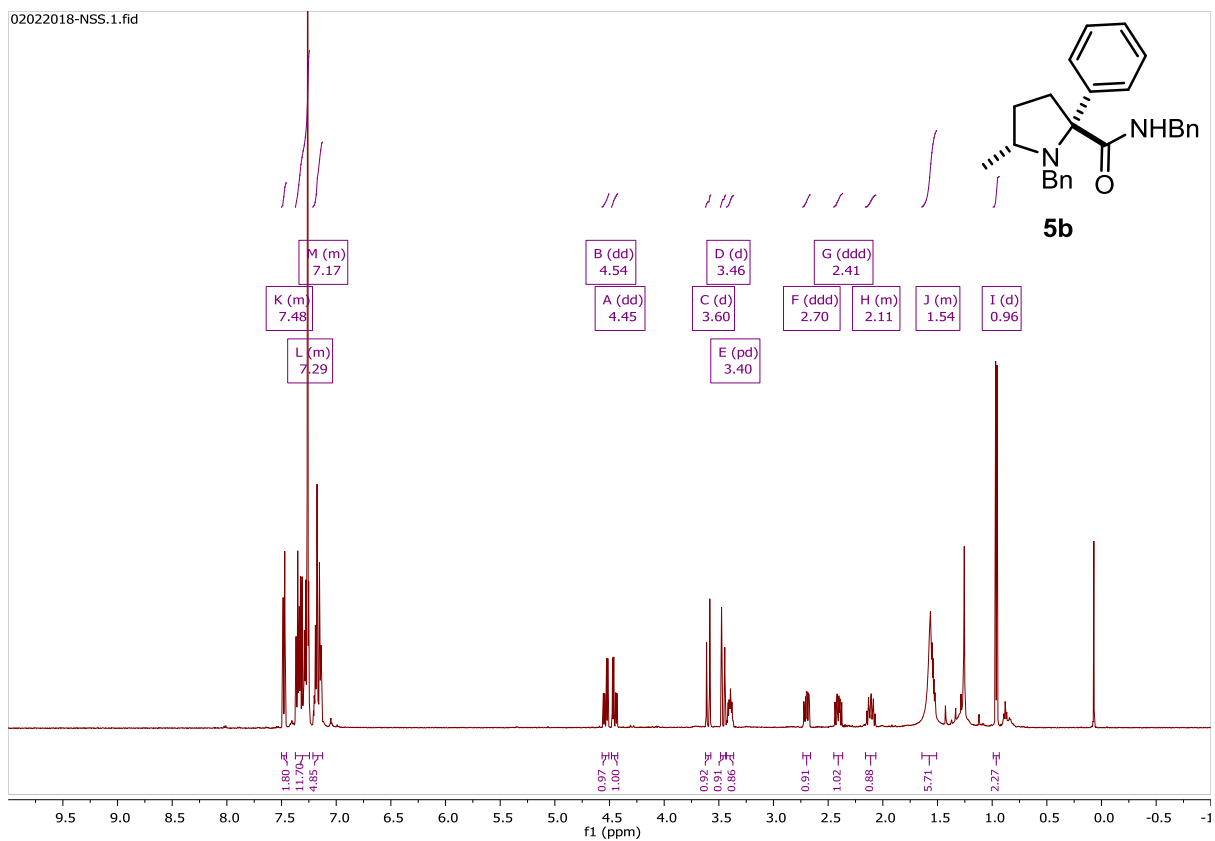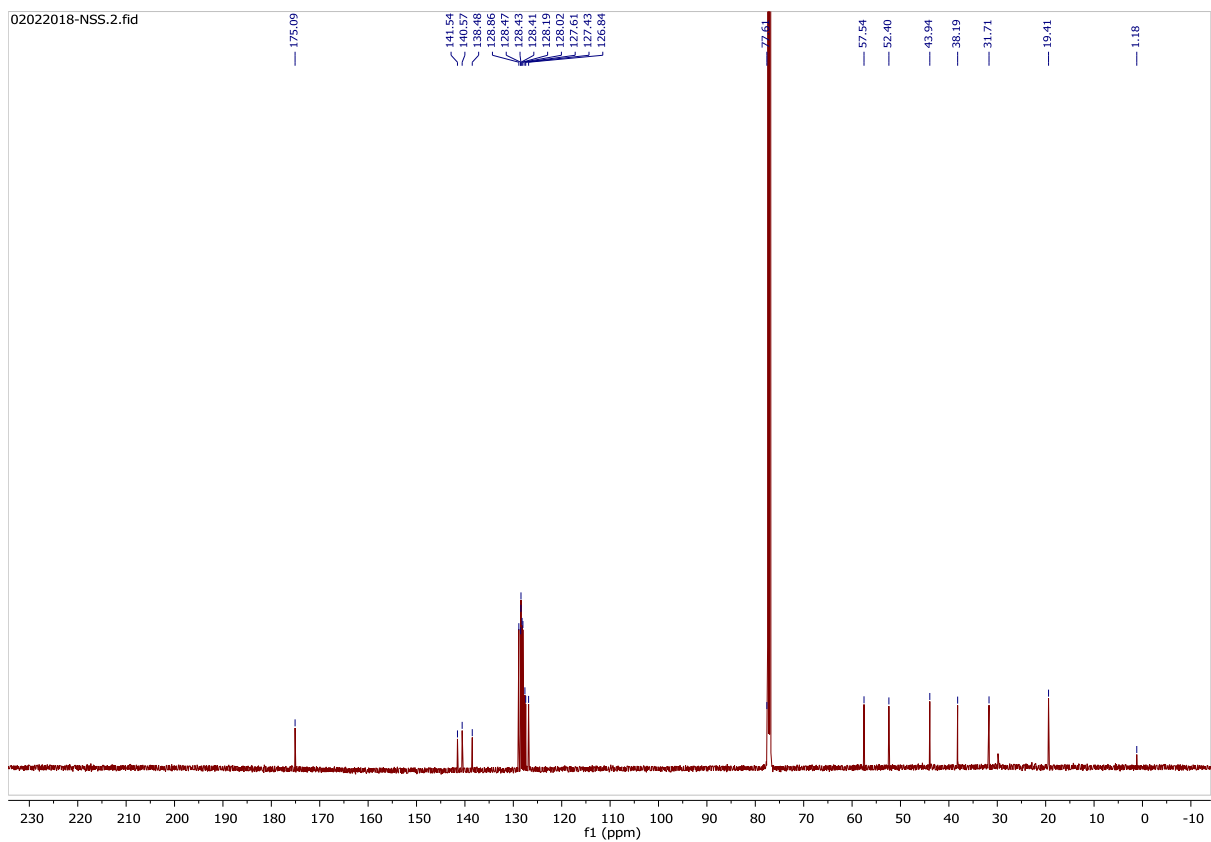

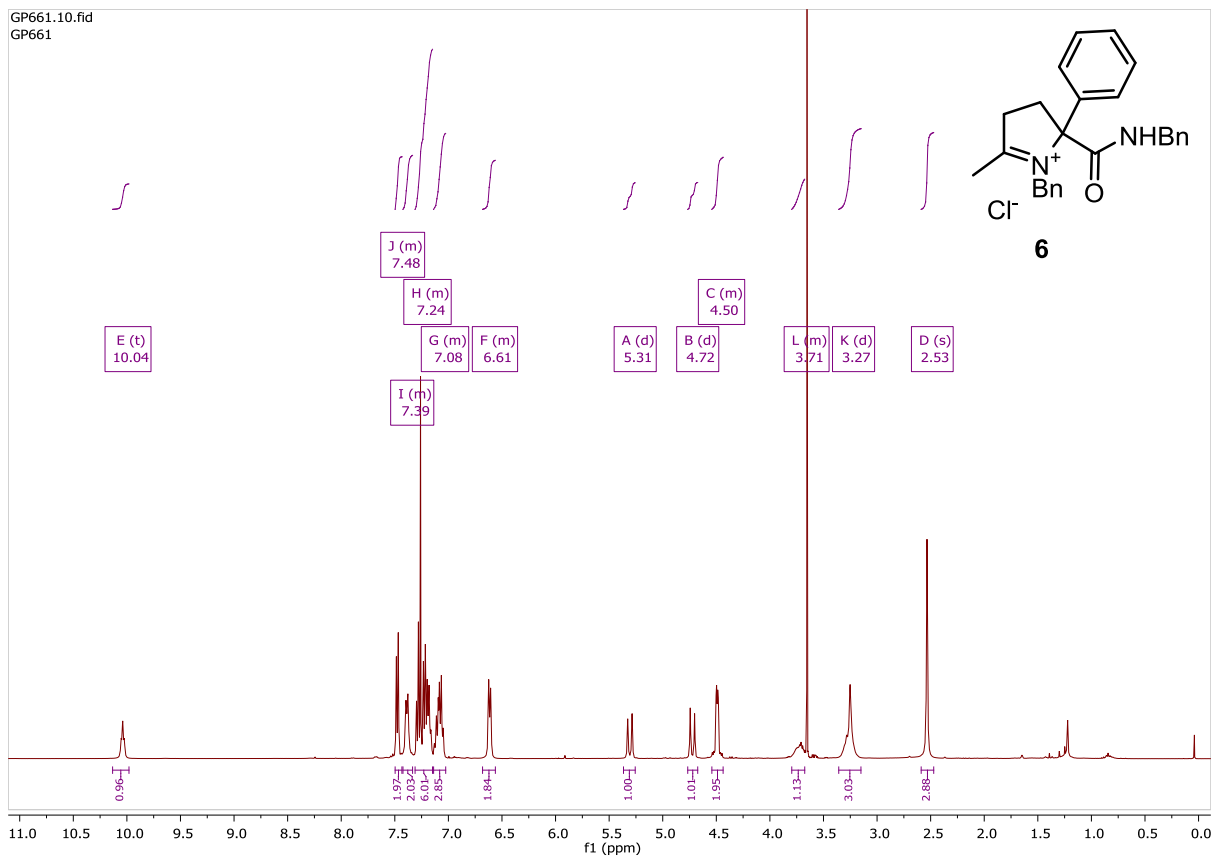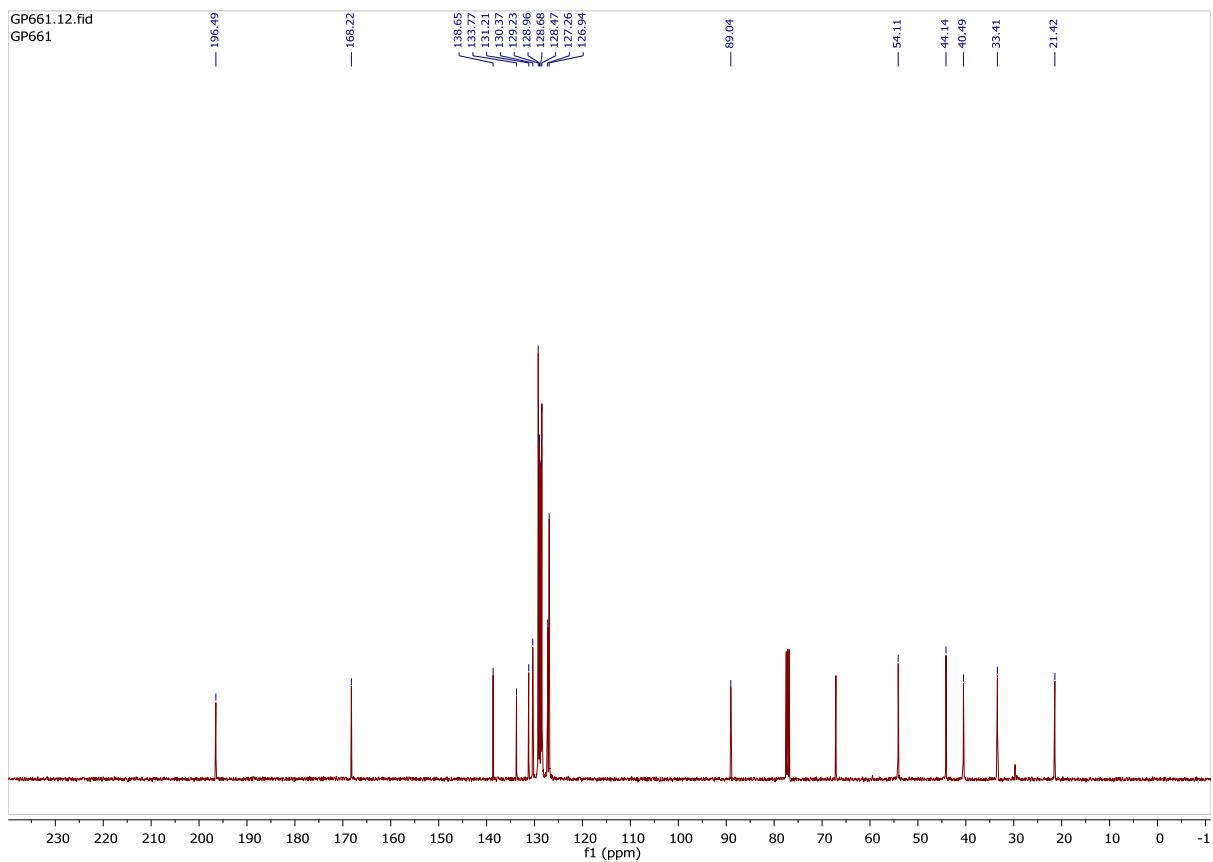

GP aClPhBn amide  
GP aClPhBn amide

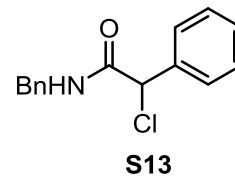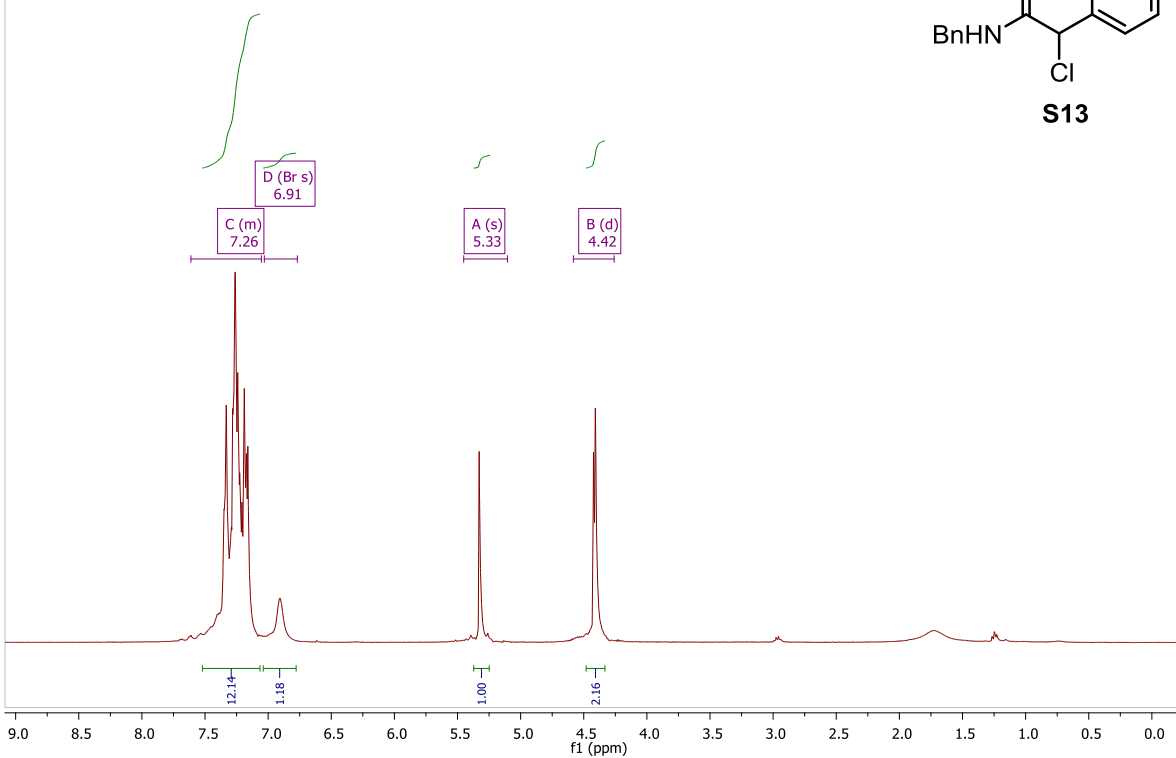

GP aClPhBn amide  
GP aClPhBn amide

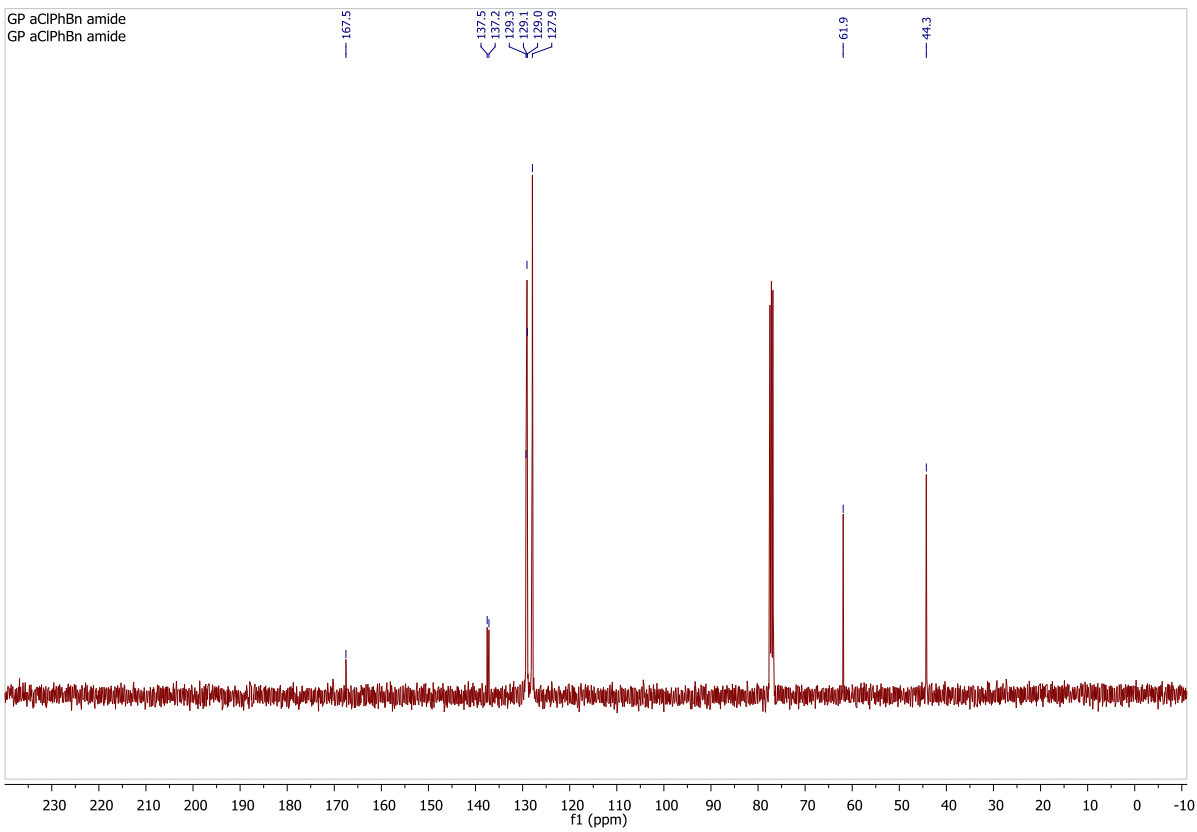

GP PC166 P3.10.fid  
GP PC166 P3

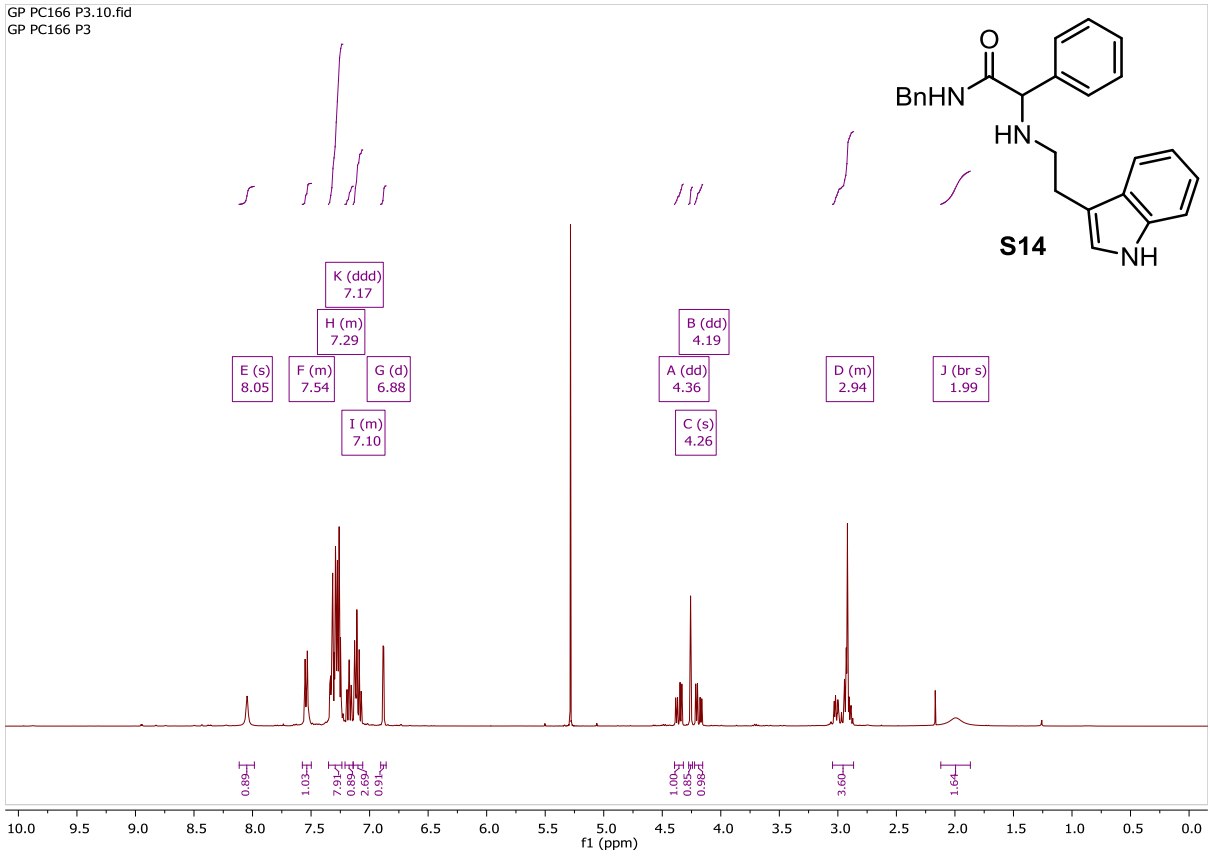

GP PC166 P3.12.fid  
GP PC166 P3

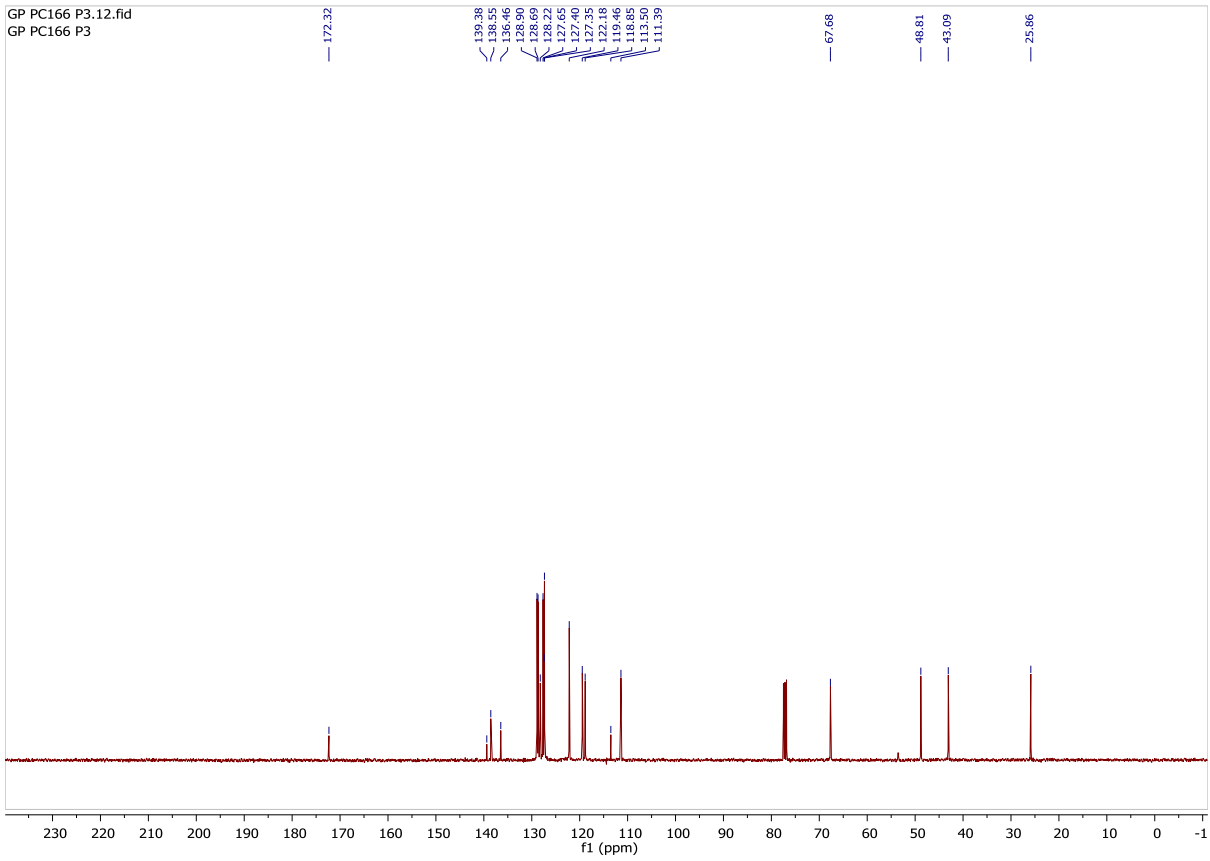

GP655 F2.10.fid  
GP655 F2

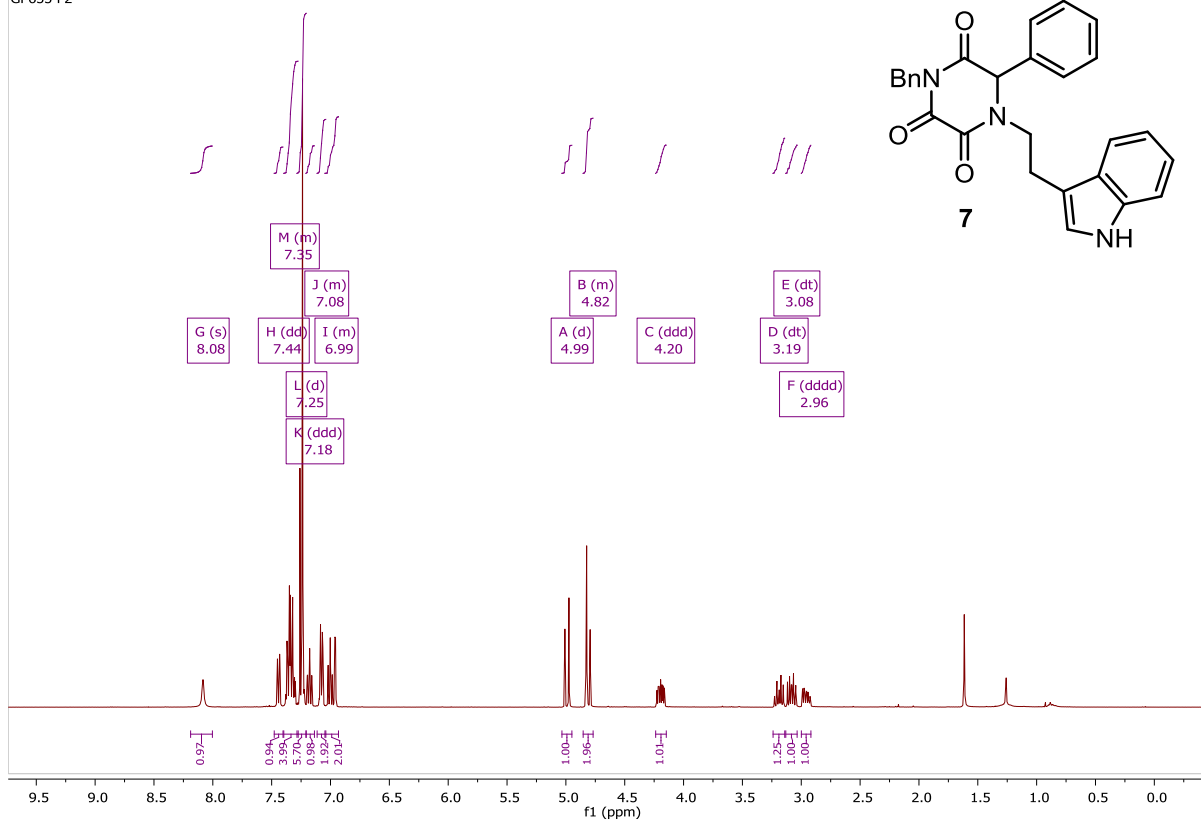

GP655 F2.12.fid  
GP655 F2

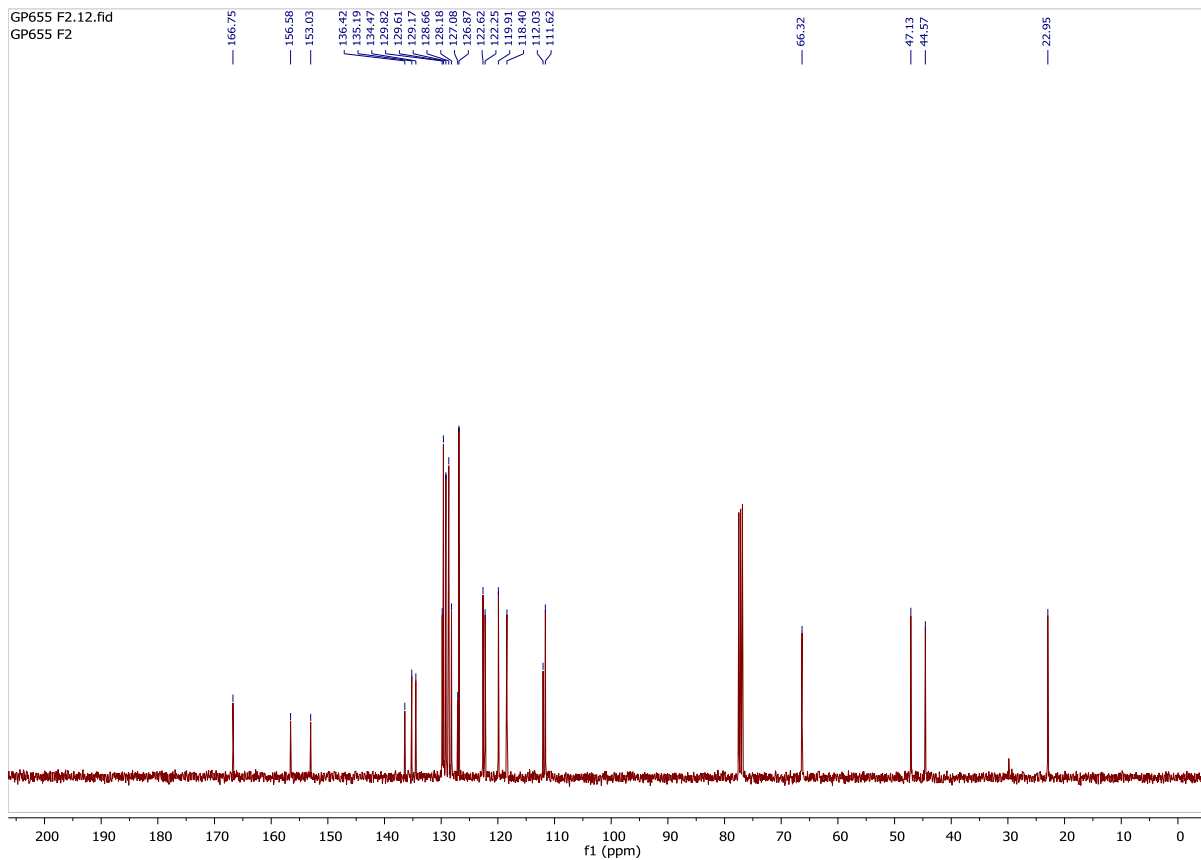

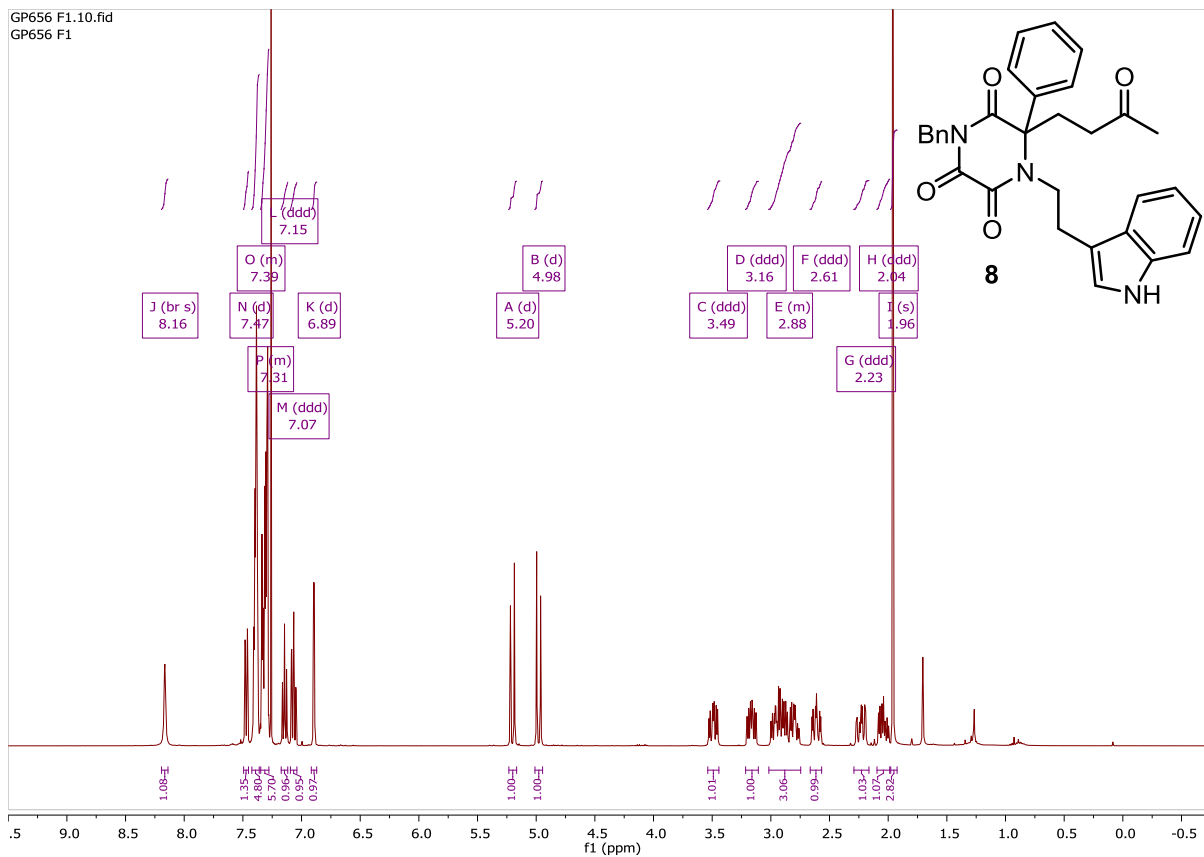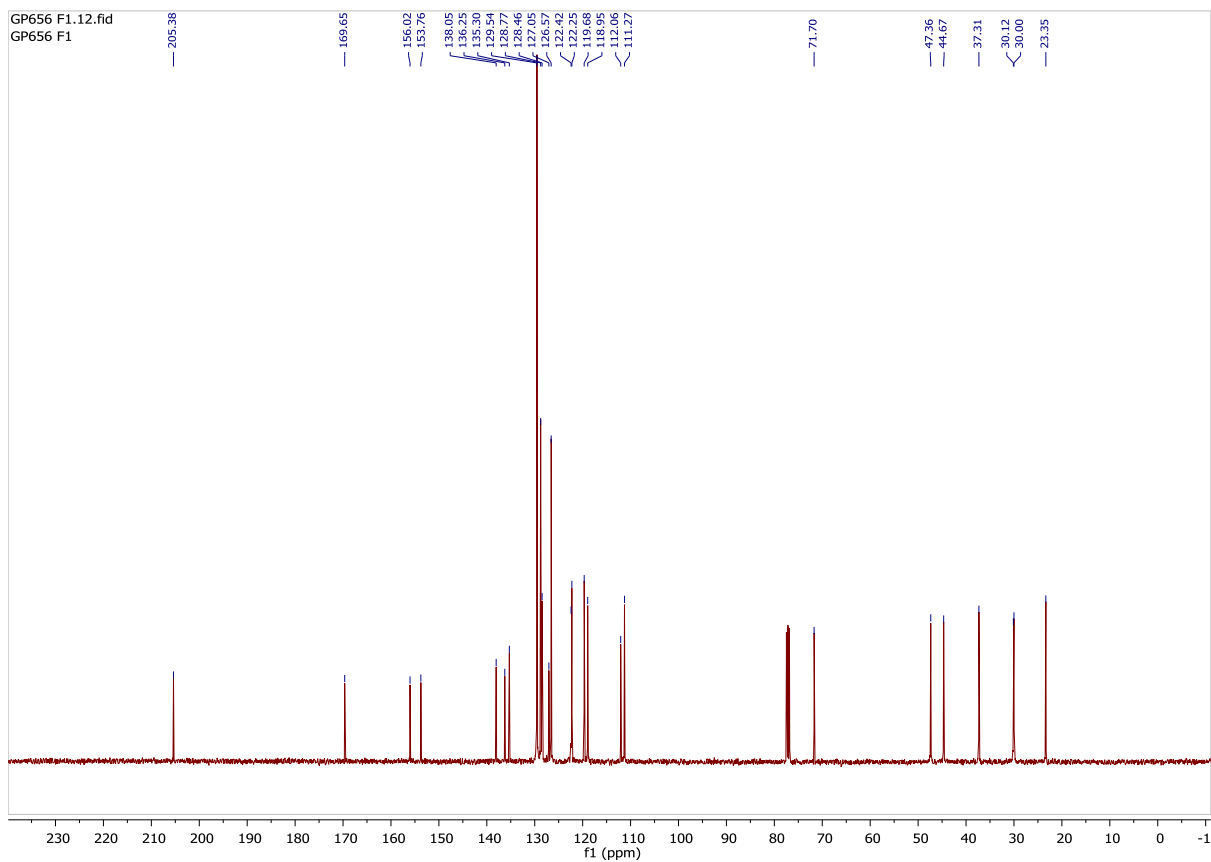



GP657 F1.10.fid  
GP657 F1

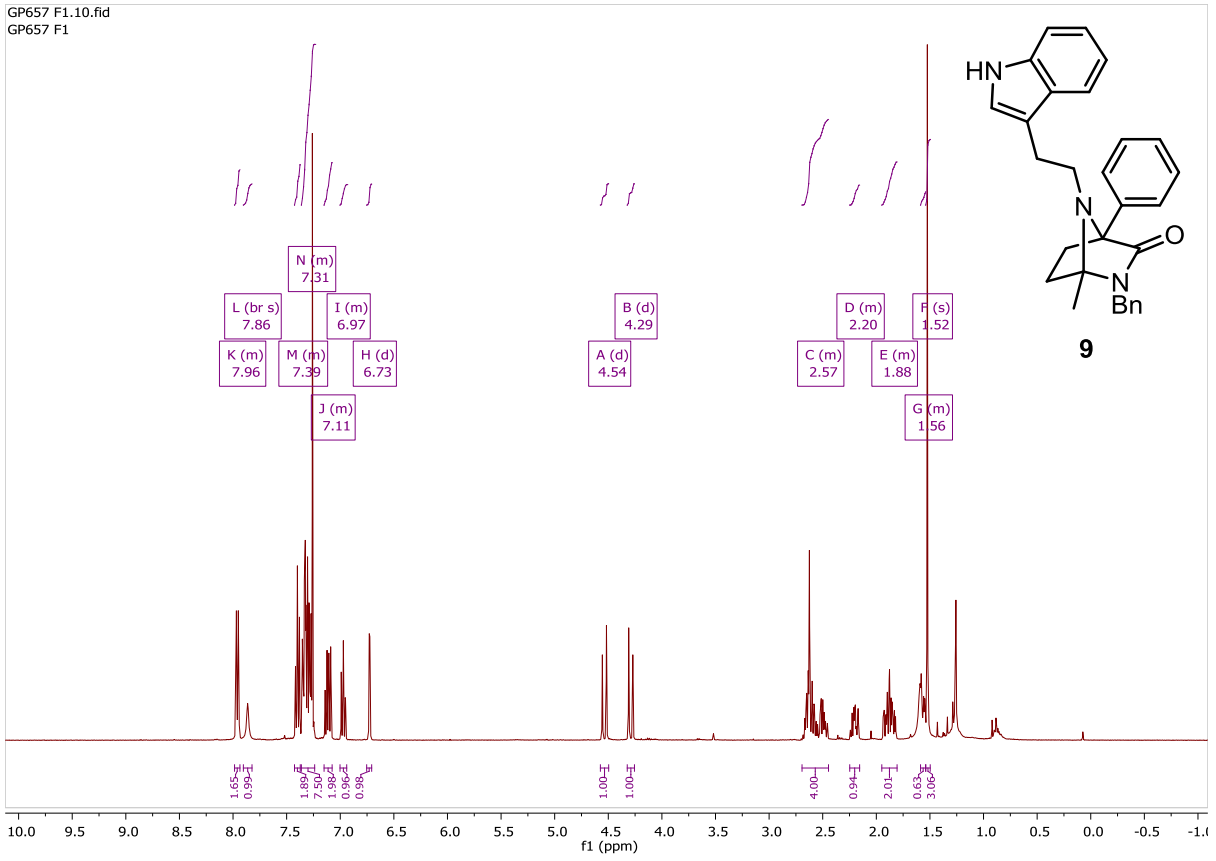

GP657 F1.12.fid  
GP657 F1

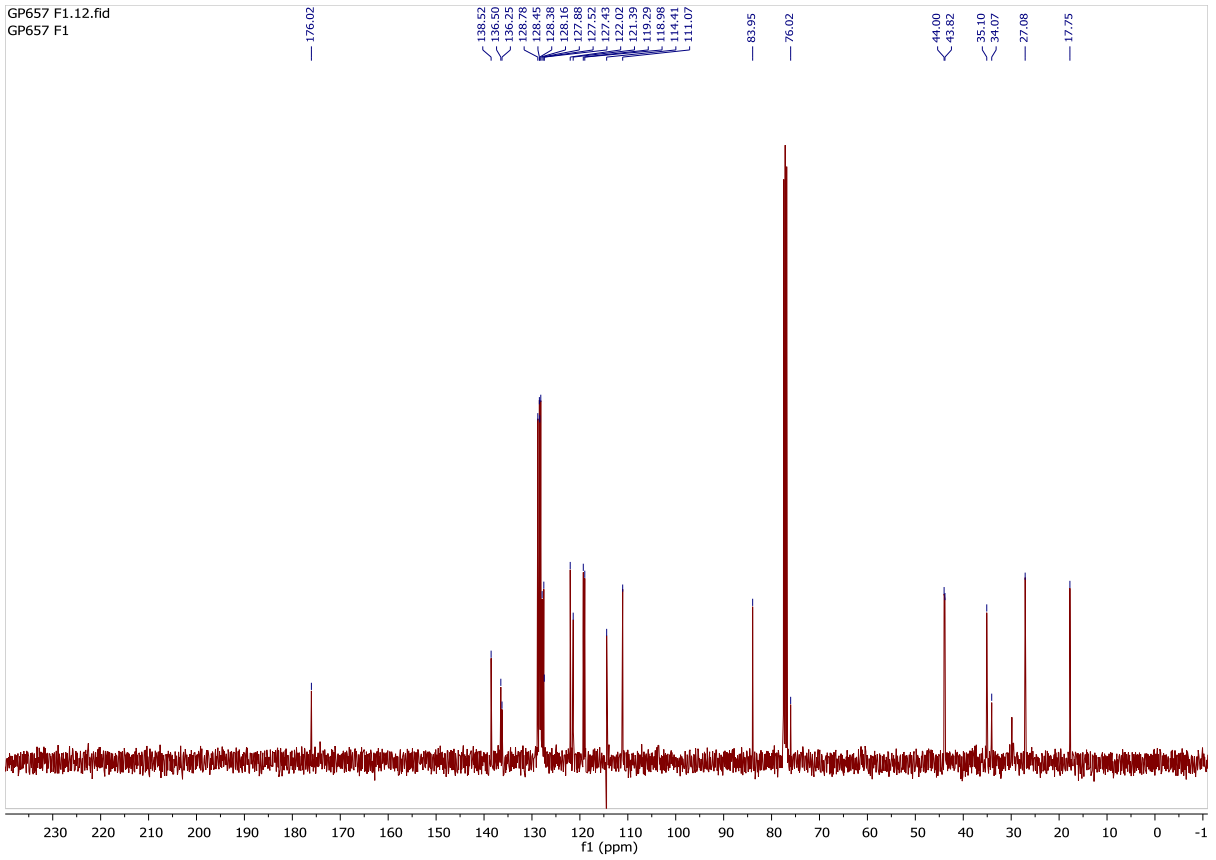

GP658-2 F1.10.fid  
GP658-2 F1

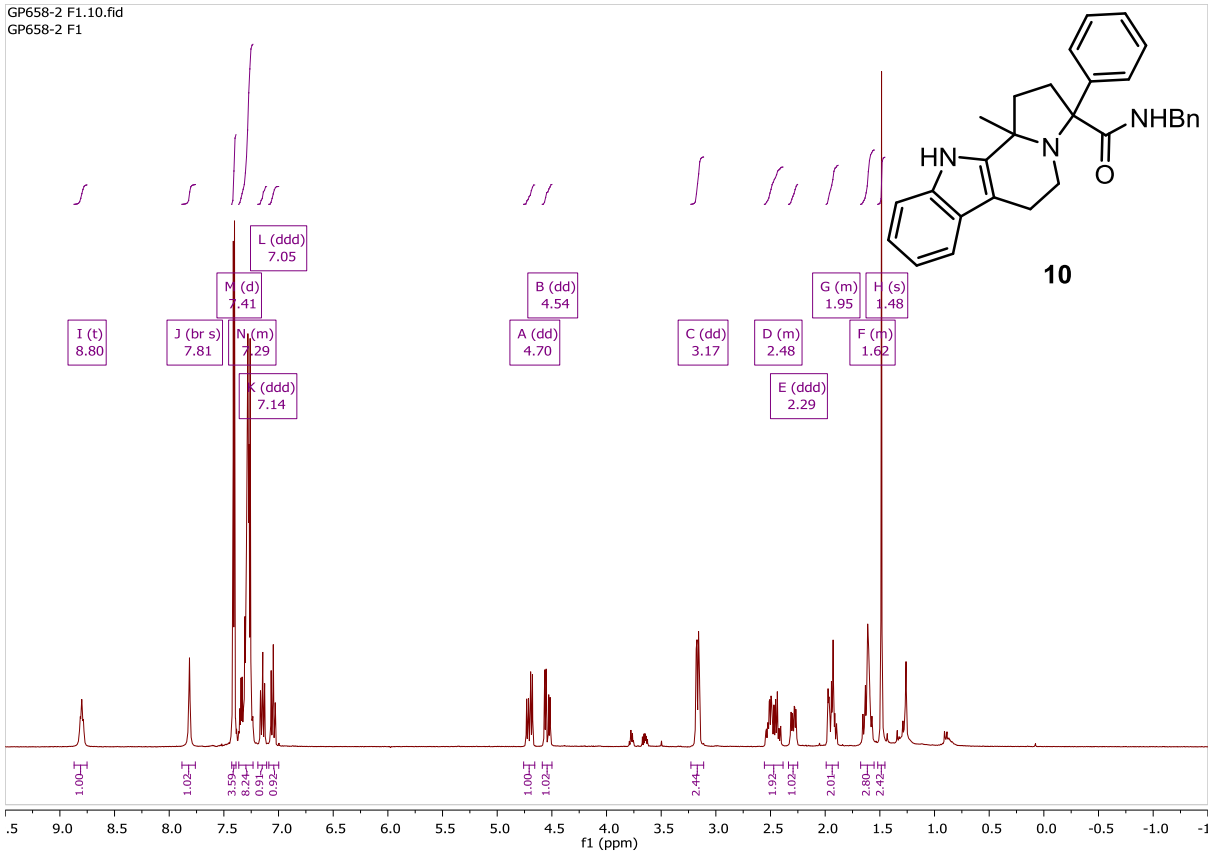

GP658-2 F1.12.fid  
GP658-2 F1

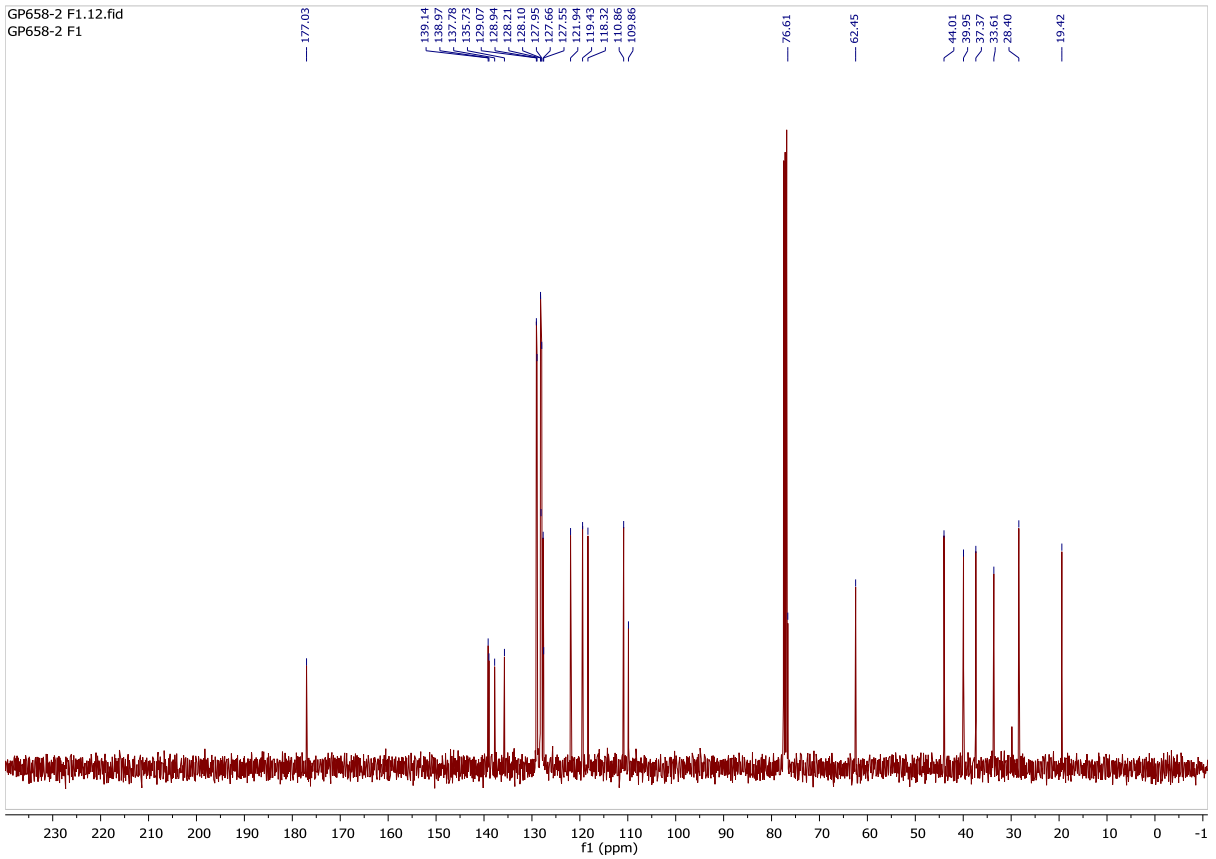

## HPLC Traces

### Racemic 2a

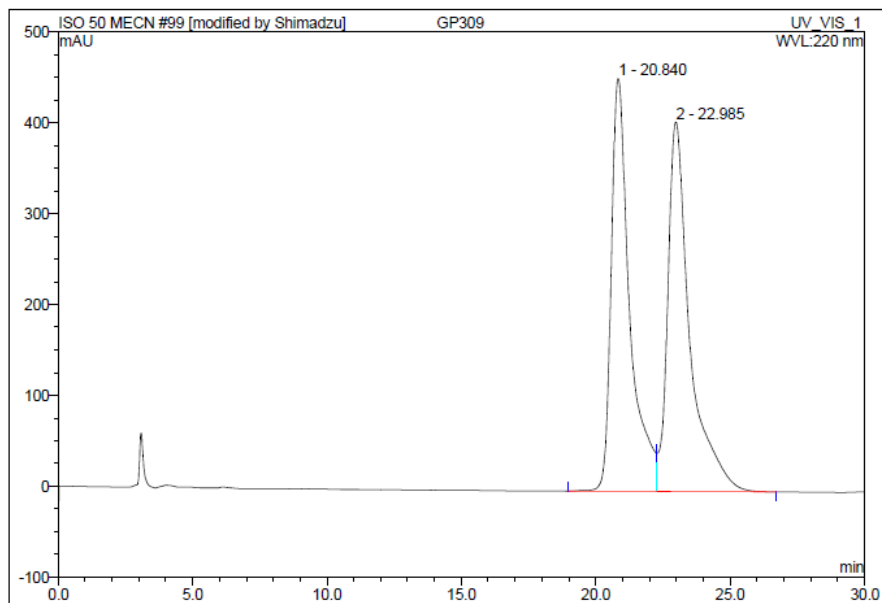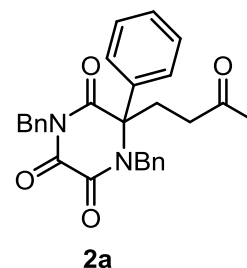

| No.           | Ret.Time<br>min | Peak Name | Height<br>mAU | Area<br>mAU*min | Rel.Area<br>% | Amount | Type |
|---------------|-----------------|-----------|---------------|-----------------|---------------|--------|------|
| 1             | 20.84           | n.a.      | 454.144       | 364.908         | 48.52         | n.a.   | BM   |
| 2             | 22.98           | n.a.      | 406.479       | 387.150         | 51.48         | n.a.   | MB   |
| <b>Total:</b> |                 |           | 860.623       | 752.058         | 100.00        | 0.000  |      |

### Enantioenriched 2a

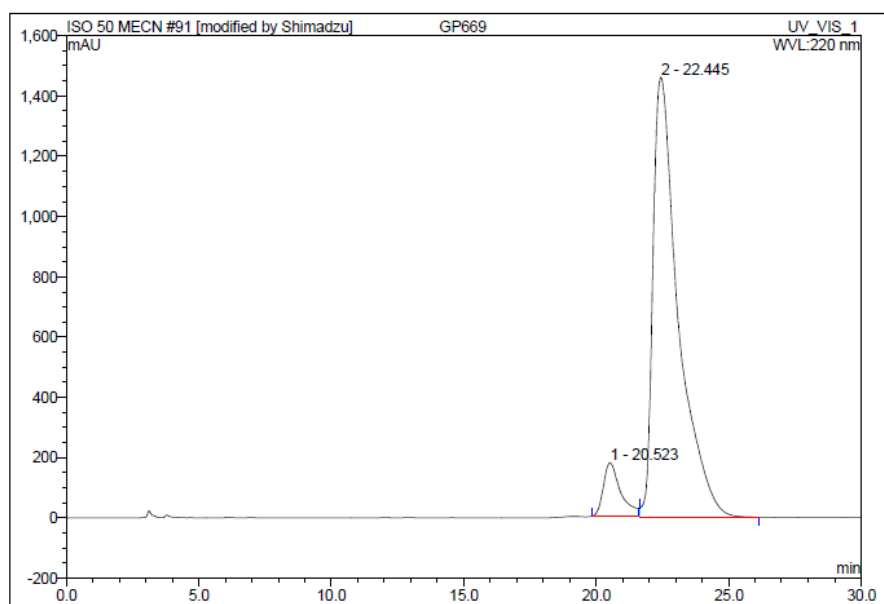

| No.           | Ret.Time<br>min | Peak Name | Height<br>mAU | Area<br>mAU*min | Rel.Area<br>% | Amount | Type |
|---------------|-----------------|-----------|---------------|-----------------|---------------|--------|------|
| 1             | 20.52           | n.a.      | 177.646       | 132.404         | 7.58          | n.a.   | BM * |
| 2             | 22.45           | n.a.      | 1460.047      | 1613.796        | 92.42         | n.a.   | MB*  |
| <b>Total:</b> |                 |           | 1637.693      | 1746.200        | 100.00        | 0.000  |      |

## Racemic 2b

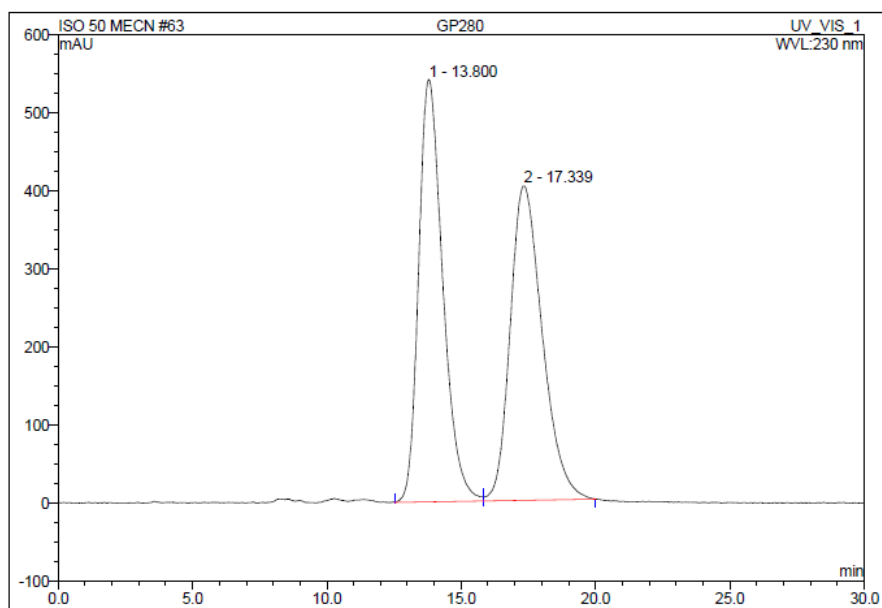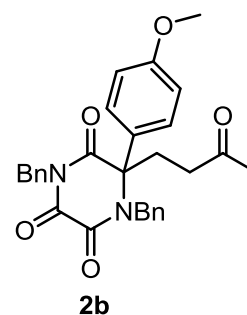

| No.           | Ret.Time<br>min | Peak Name | Height<br>mAU | Area<br>mAU*min | Rel.Area<br>% | Amount | Type |
|---------------|-----------------|-----------|---------------|-----------------|---------------|--------|------|
| 1             | 13.80           | n.a.      | 541.362       | 562.858         | 50.17         | n.a.   | BM   |
| 2             | 17.34           | n.a.      | 403.063       | 559.055         | 49.83         | n.a.   | MB   |
| <b>Total:</b> |                 |           | 944.425       | 1121.913        | 100.00        | 0.000  |      |

## Enantioenriched 2b

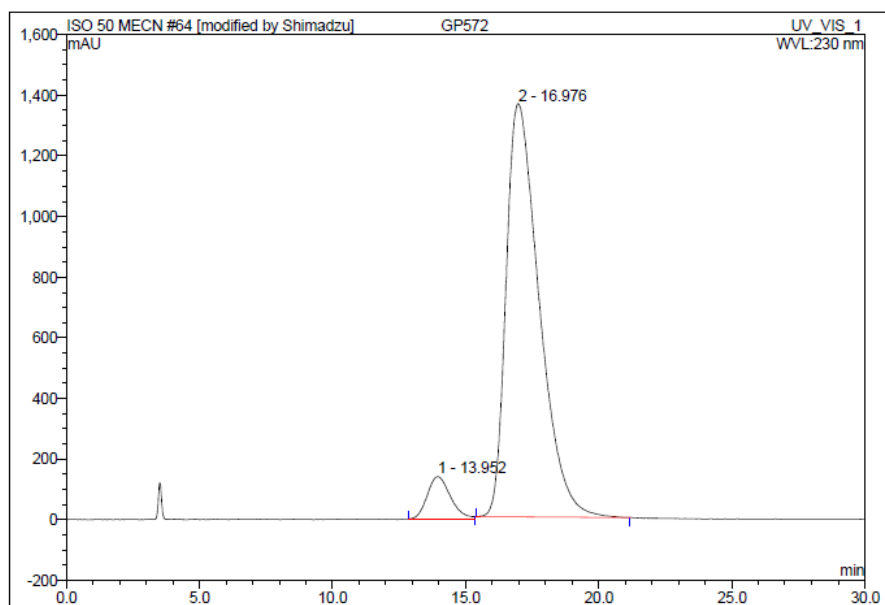

| No.           | Ret.Time<br>min | Peak Name | Height<br>mAU | Area<br>mAU*min | Rel.Area<br>% | Amount | Type |
|---------------|-----------------|-----------|---------------|-----------------|---------------|--------|------|
| 1             | 13.95           | n.a.      | 140.291       | 142.204         | 6.75          | n.a.   | BM * |
| 2             | 16.98           | n.a.      | 1363.126      | 1964.114        | 93.25         | n.a.   | BMB* |
| <b>Total:</b> |                 |           | 1503.417      | 2106.317        | 100.00        | 0.000  |      |

## Racemic 2c

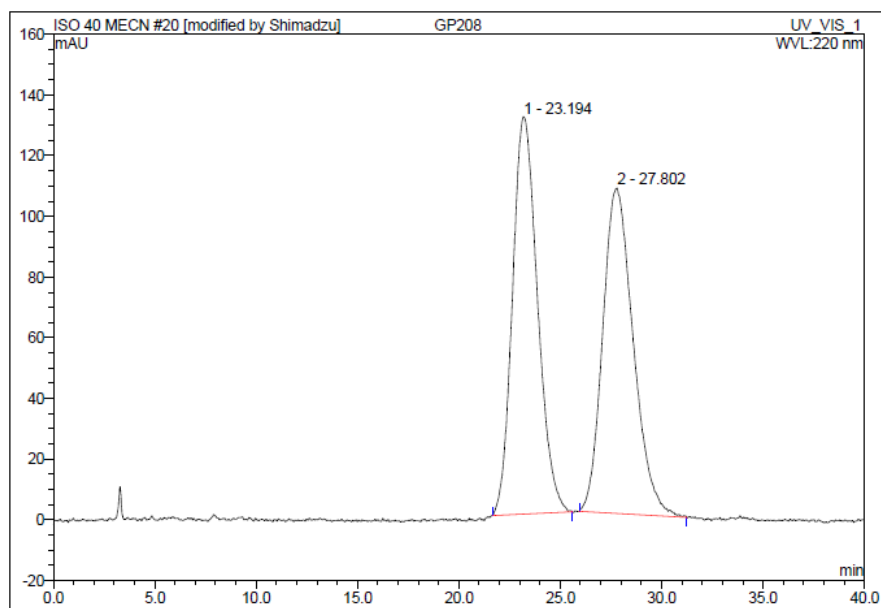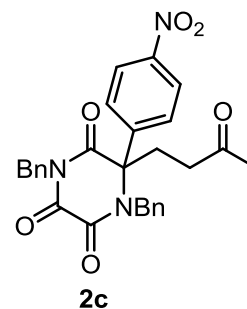

| No.           | Ret.Time<br>min | Peak Name | Height<br>mAU | Area<br>mAU*min | Rel.Area<br>% | Amount | Type |
|---------------|-----------------|-----------|---------------|-----------------|---------------|--------|------|
| 1             | 23.19           | n.a.      | 130.978       | 187.560         | 50.09         | n.a.   | BMB* |
| 2             | 27.80           | n.a.      | 107.295       | 186.869         | 49.91         | n.a.   | BMB* |
| <b>Total:</b> |                 |           | 238.272       | 374.428         | 100.00        | 0.000  |      |

## Enantioenriched 2c

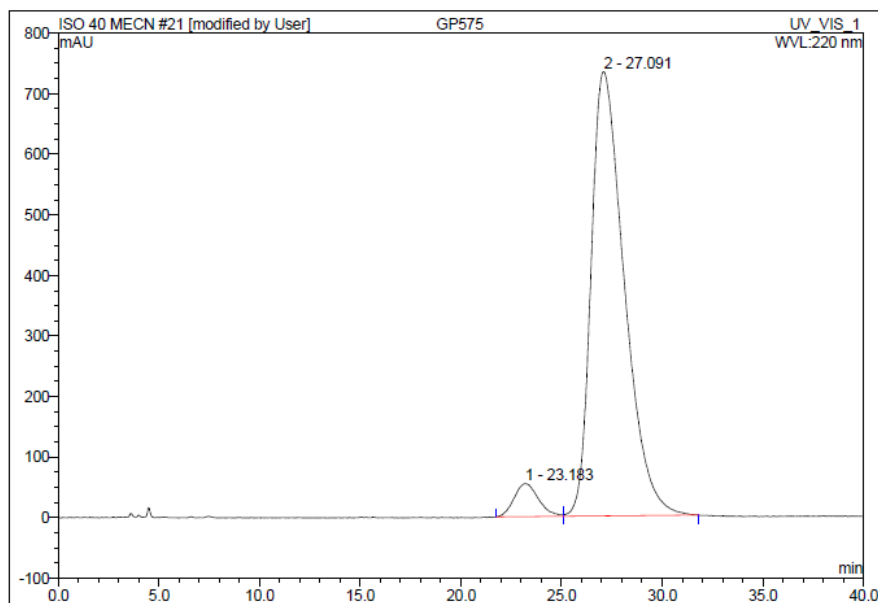

| No.           | Ret.Time<br>min | Peak Name | Height<br>mAU | Area<br>mAU*min | Rel.Area<br>% | Amount | Type |
|---------------|-----------------|-----------|---------------|-----------------|---------------|--------|------|
| 1             | 23.18           | n.a.      | 54.700        | 76.651          | 5.18          | n.a.   | BM * |
| 2             | 27.09           | n.a.      | 733.882       | 1402.155        | 94.82         | n.a.   | MB*  |
| <b>Total:</b> |                 |           | 788.582       | 1478.805        | 100.00        | 0.000  |      |

## Racemic 2d

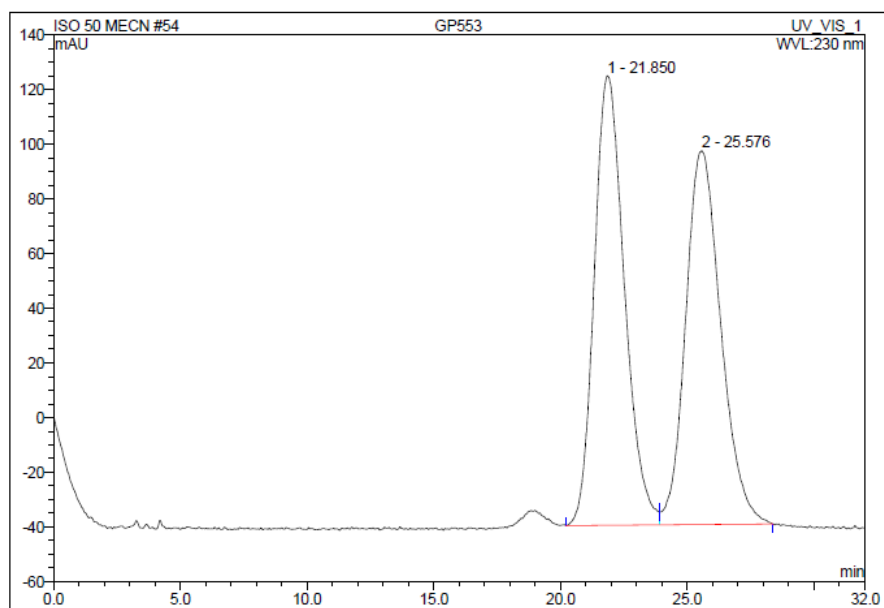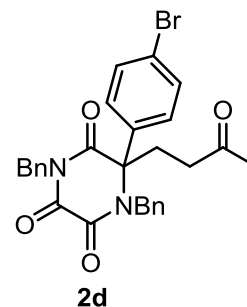

| No.           | Ret.Time<br>min | Peak Name | Height<br>mAU | Area<br>mAU*min | Rel.Area<br>% | Amount | Type |
|---------------|-----------------|-----------|---------------|-----------------|---------------|--------|------|
| 1             | 21.85           | n.a.      | 164.480       | 226.832         | 50.69         | n.a.   | BM   |
| 2             | 25.58           | n.a.      | 136.763       | 220.650         | 49.31         | n.a.   | MB   |
| <b>Total:</b> |                 |           | 301.243       | 447.481         | 100.00        | 0.000  |      |

## Enantioenriched 2d

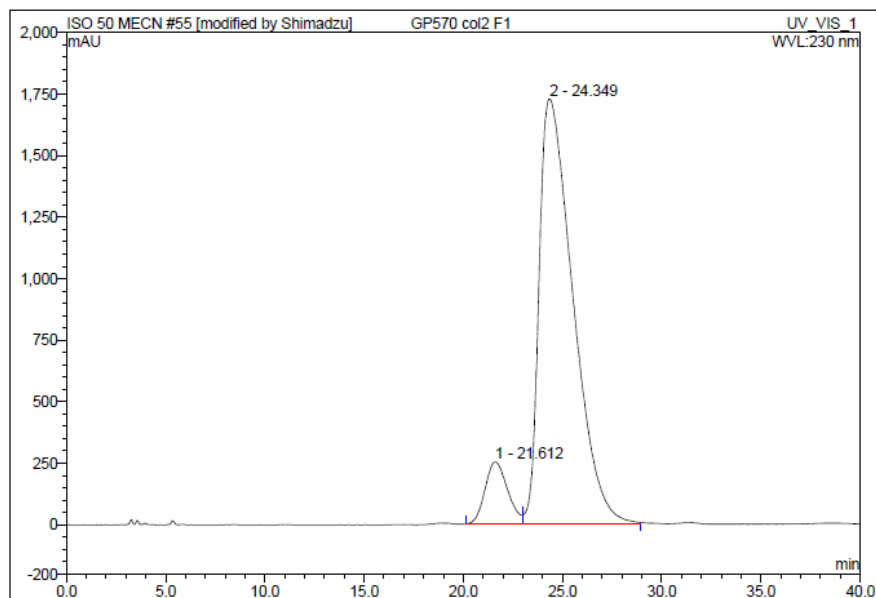

| No.           | Ret.Time<br>min | Peak Name | Height<br>mAU | Area<br>mAU*min | Rel.Area<br>% | Amount | Type |
|---------------|-----------------|-----------|---------------|-----------------|---------------|--------|------|
| 1             | 21.61           | n.a.      | 251.463       | 330.308         | 8.85          | n.a.   | BM * |
| 2             | 24.35           | n.a.      | 1726.188      | 3401.101        | 91.15         | n.a.   | M *  |
| <b>Total:</b> |                 |           | 1977.651      | 3731.409        | 100.00        | 0.000  |      |

## Racemic **2e**

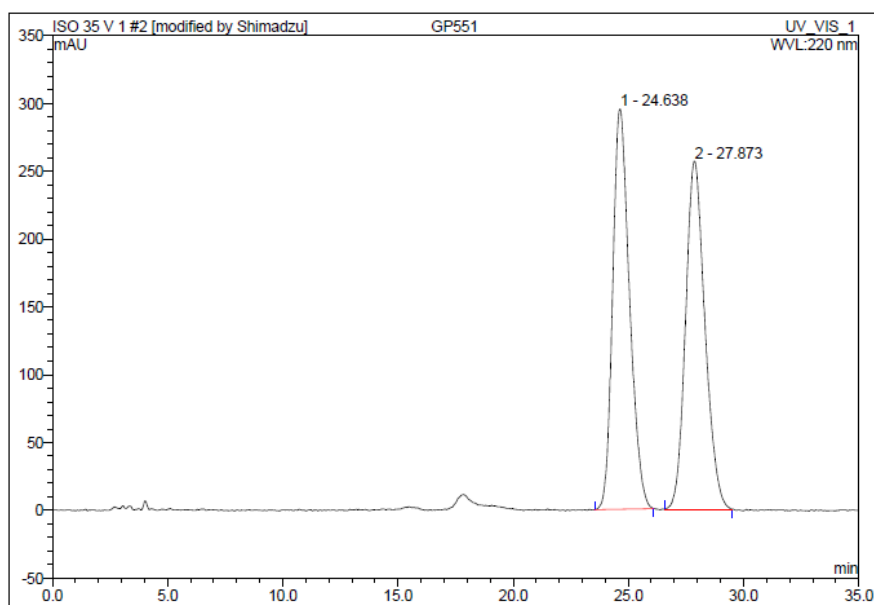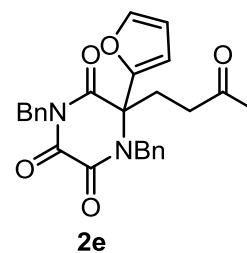

| No.           | Ret. Time<br>min | Peak Name | Height<br>mAU | Area<br>mAU*min | Rel. Area<br>% | Amount | Type |
|---------------|------------------|-----------|---------------|-----------------|----------------|--------|------|
| 1             | 24.64            | n.a.      | 294.928       | 249.797         | 49.97          | n.a.   | BMB  |
| 2             | 27.87            | n.a.      | 256.581       | 250.075         | 50.03          | n.a.   | BMB  |
| <b>Total:</b> |                  |           | 551.509       | 499.872         | 100.00         | 0.000  |      |

## Enantioenriched **2e**

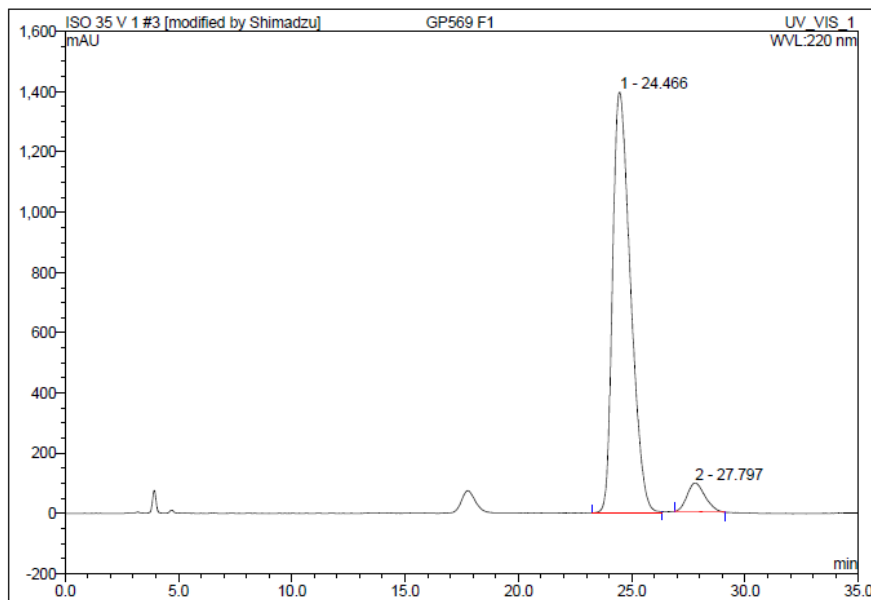

| No.           | Ret. Time<br>min | Peak Name | Height<br>mAU | Area<br>mAU*min | Rel. Area<br>% | Amount | Type |
|---------------|------------------|-----------|---------------|-----------------|----------------|--------|------|
| 1             | 24.47            | n.a.      | 1397.277      | 1282.471        | 93.61          | n.a.   | BM * |
| 2             | 27.80            | n.a.      | 95.256        | 87.511          | 6.39           | n.a.   | BMB* |
| <b>Total:</b> |                  |           | 1492.533      | 1369.982        | 100.00         | 0.000  |      |

## Racemic 2f

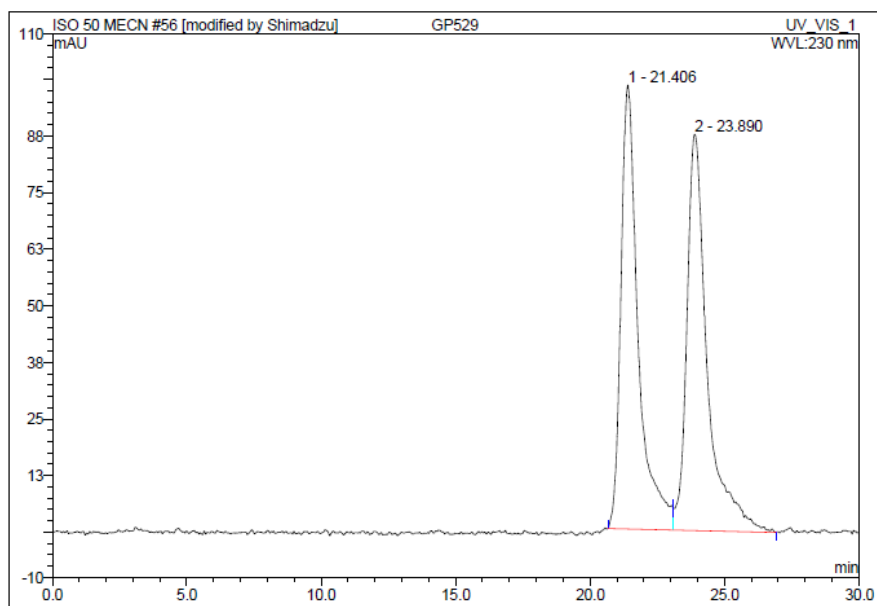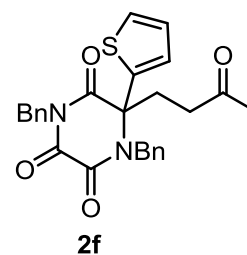

| No.           | Ret.Time<br>min | Peak Name | Height<br>mAU | Area<br>mAU*min | Rel.Area<br>% | Amount | Type |
|---------------|-----------------|-----------|---------------|-----------------|---------------|--------|------|
| 1             | 21.41           | n.a.      | 98.037        | 73.320          | 48.81         | n.a.   | BM * |
| 2             | 23.89           | n.a.      | 87.496        | 76.908          | 51.19         | n.a.   | MB*  |
| <b>Total:</b> |                 |           | 185.533       | 150.228         | 100.00        | 0.000  |      |

## Enantioenriched 2f

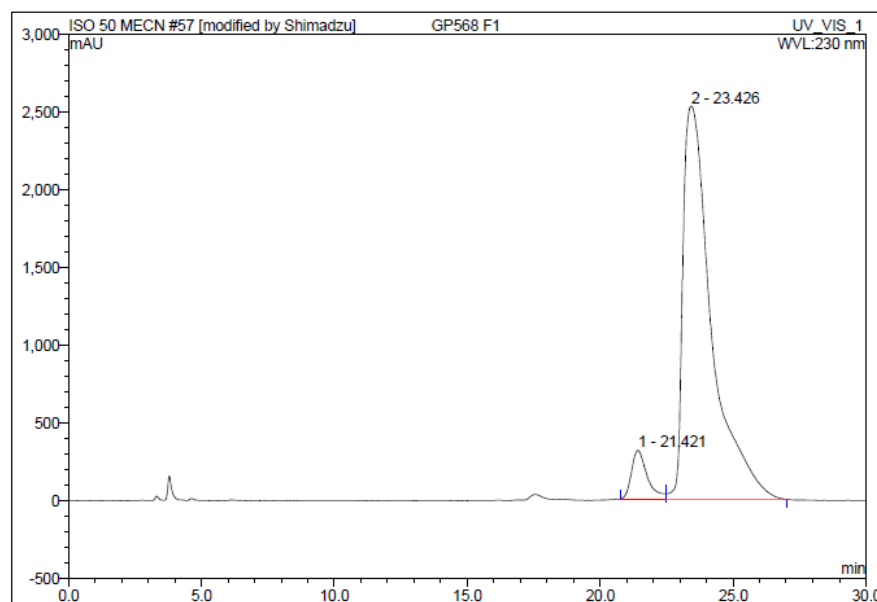

| No.           | Ret.Time<br>min | Peak Name | Height<br>mAU | Area<br>mAU*min | Rel.Area<br>% | Amount | Type |
|---------------|-----------------|-----------|---------------|-----------------|---------------|--------|------|
| 1             | 21.42           | n.a.      | 311.979       | 212.461         | 6.33          | n.a.   | BM * |
| 2             | 23.43           | n.a.      | 2529.509      | 3144.680        | 93.67         | n.a.   | MB*  |
| <b>Total:</b> |                 |           | 2841.488      | 3357.141        | 100.00        | 0.000  |      |



## Racemic **2g**

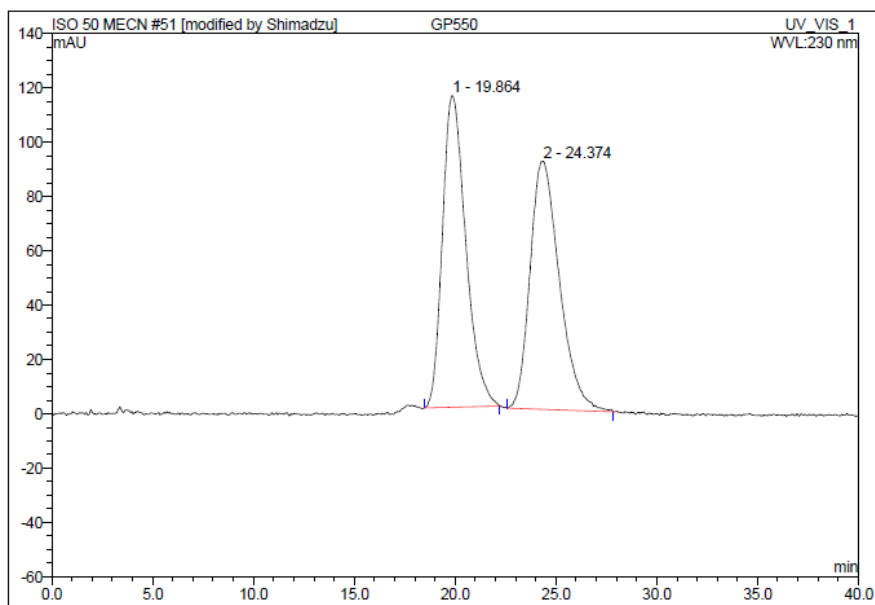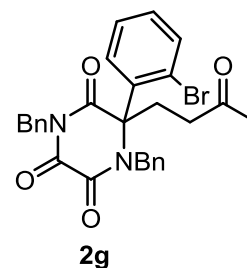

| No.           | Ret.Time min | Peak Name | Height mAU | Area mAU*min | Rel.Area % | Amount | Type |
|---------------|--------------|-----------|------------|--------------|------------|--------|------|
| 1             | 19.86        | n.a.      | 114.742    | 154.150      | 49.95      | n.a.   | BMB  |
| 2             | 24.37        | n.a.      | 91.413     | 154.475      | 50.05      | n.a.   | BMB* |
| <b>Total:</b> |              |           | 206.155    | 308.625      | 100.00     | 0.000  |      |

## Enantioenriched **2g**

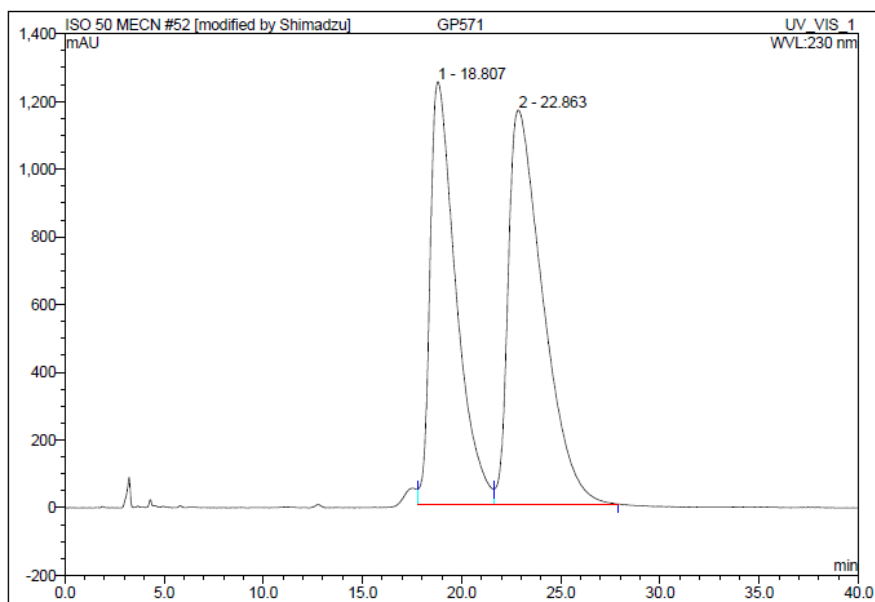

| No.           | Ret.Time min | Peak Name | Height mAU | Area mAU*min | Rel.Area % | Amount | Type |
|---------------|--------------|-----------|------------|--------------|------------|--------|------|
| 1             | 18.81        | n.a.      | 1246.977   | 1888.738     | 44.52      | n.a.   | M*   |
| 2             | 22.86        | n.a.      | 1163.774   | 2354.138     | 55.48      | n.a.   | MB*  |
| <b>Total:</b> |              |           | 2410.751   | 4242.876     | 100.00     | 0.000  |      |

## Racemic 2h

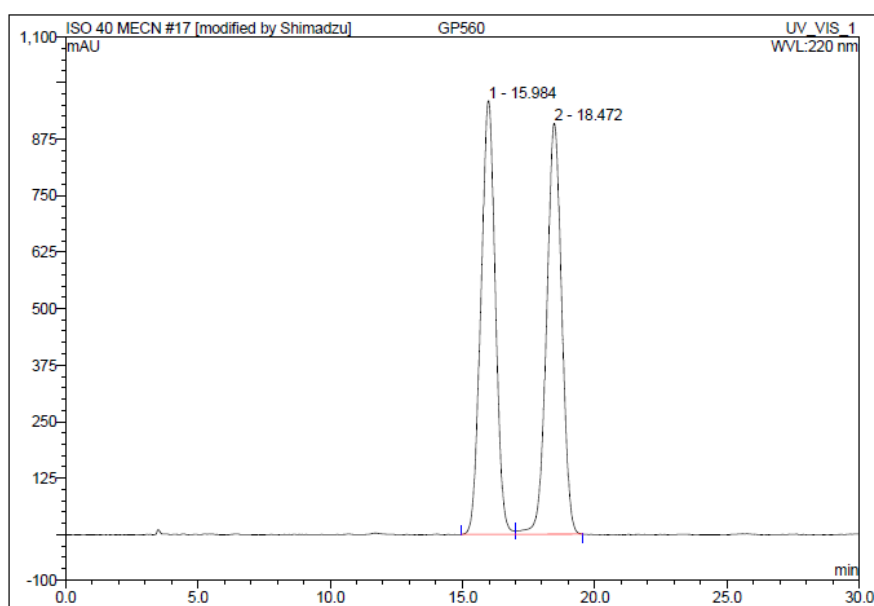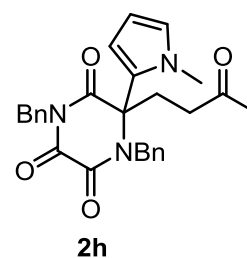

| No.           | Ret.Time<br>min | Peak Name | Height<br>mAU | Area<br>mAU*min | Rel.Area<br>% | Amount | Type |
|---------------|-----------------|-----------|---------------|-----------------|---------------|--------|------|
| 1             | 15.98           | n.a.      | 958.754       | 607.956         | 50.14         | n.a.   | BM   |
| 2             | 18.47           | n.a.      | 908.054       | 604.457         | 49.86         | n.a.   | MB   |
| <b>Total:</b> |                 |           | 1866.807      | 1212.413        | 100.00        | 0.000  |      |

## Enantioenriched 2h

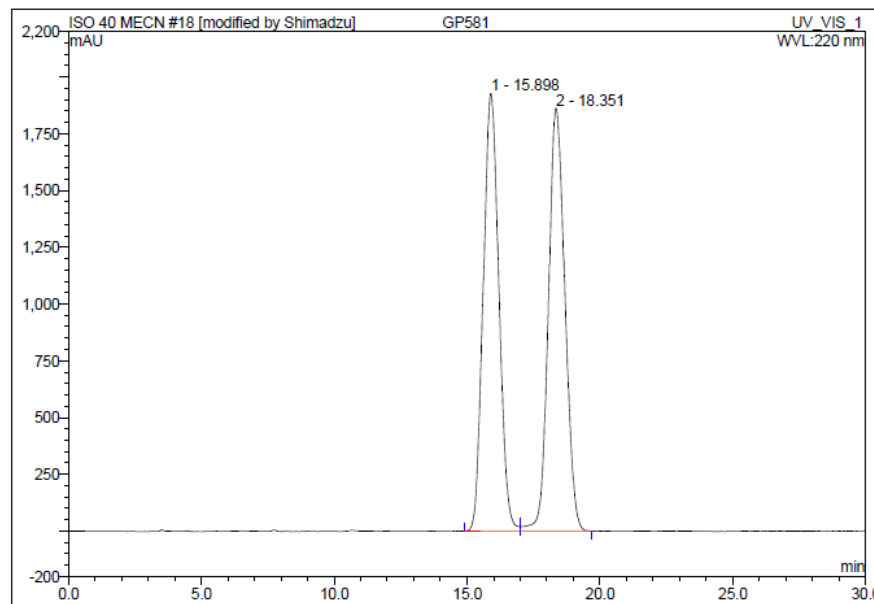

| No.           | Ret.Time<br>min | Peak Name | Height<br>mAU | Area<br>mAU*min | Rel.Area<br>% | Amount | Type |
|---------------|-----------------|-----------|---------------|-----------------|---------------|--------|------|
| 1             | 15.90           | n.a.      | 1927.872      | 1316.173        | 49.44         | n.a.   | BM   |
| 2             | 18.35           | n.a.      | 1862.252      | 1346.180        | 50.56         | n.a.   | MB   |
| <b>Total:</b> |                 |           | 3790.124      | 2662.353        | 100.00        | 0.000  |      |

## Racemic 2i

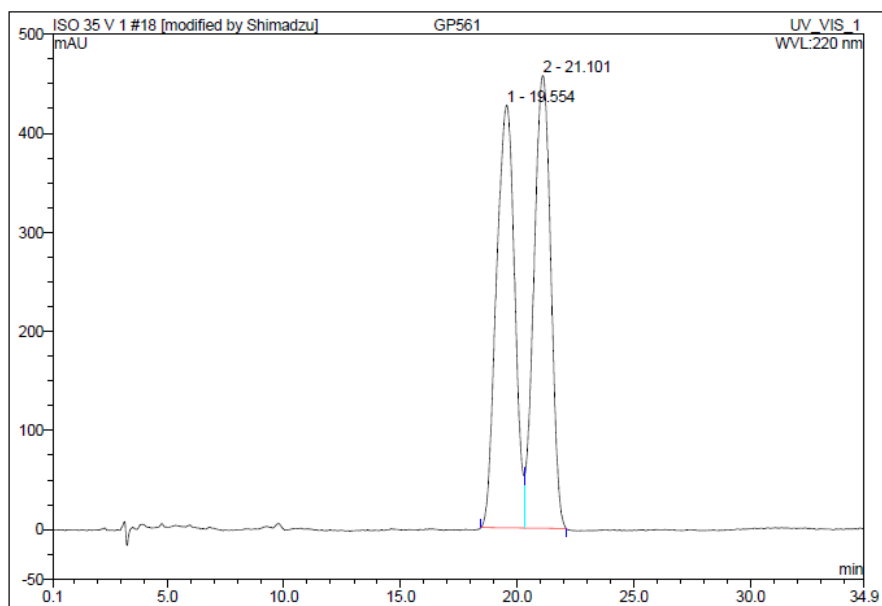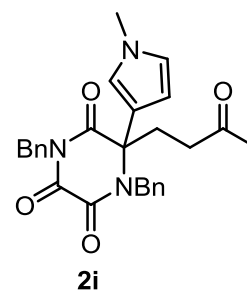

| No.           | Ret.Time min | Peak Name | Height mAU | Area mAU*min | Rel.Area % | Amount | Type |
|---------------|--------------|-----------|------------|--------------|------------|--------|------|
| 1             | 19.55        | n.a.      | 426.460    | 384.961      | 50.07      | n.a.   | BM * |
| 2             | 21.10        | n.a.      | 456.759    | 383.860      | 49.93      | n.a.   | MB*  |
| <b>Total:</b> |              |           | 883.219    | 768.822      | 100.00     | 0.000  |      |

## Enantioenriched 2i

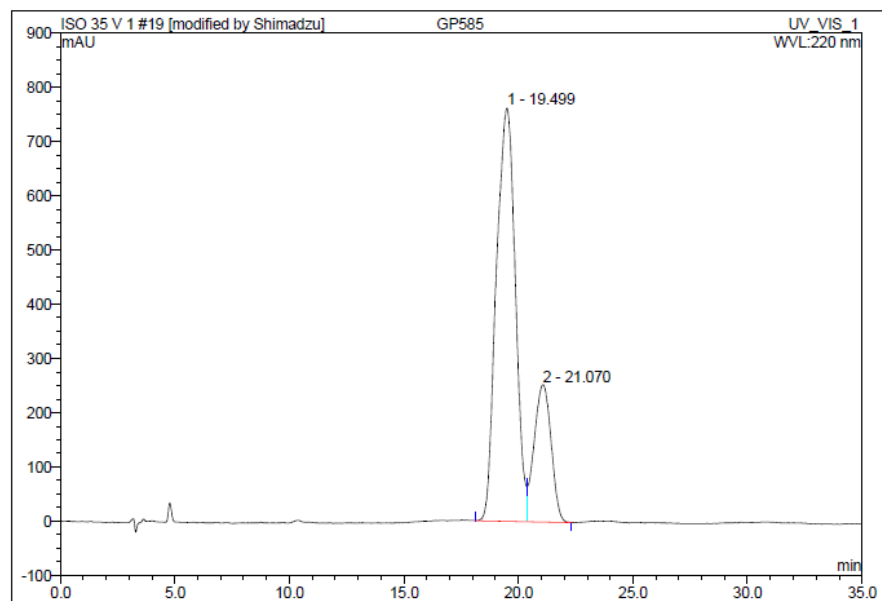

| No.           | Ret.Time min | Peak Name | Height mAU | Area mAU*min | Rel.Area % | Amount | Type |
|---------------|--------------|-----------|------------|--------------|------------|--------|------|
| 1             | 19.50        | n.a.      | 761.853    | 730.578      | 76.98      | n.a.   | BM   |
| 2             | 21.07        | n.a.      | 253.055    | 218.440      | 23.02      | n.a.   | MB   |
| <b>Total:</b> |              |           | 1014.909   | 949.018      | 100.00     | 0.000  |      |

## Racemic 2j

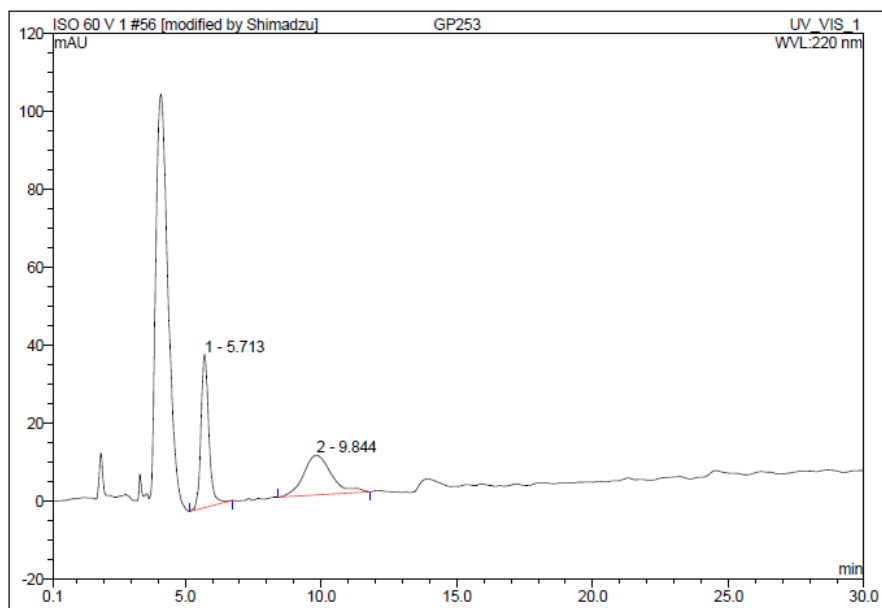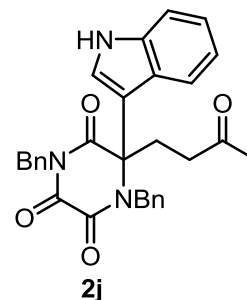

| No.           | Ret.Time<br>min | Peak Name | Height<br>mAU | Area<br>mAU*min | Rel.Area<br>% | Amount | Type |
|---------------|-----------------|-----------|---------------|-----------------|---------------|--------|------|
| 1             | 5.71            | n.a.      | 39.245        | 13.113          | 51.85         | n.a.   | BMB* |
| 2             | 9.84            | n.a.      | 10.163        | 12.176          | 48.15         | n.a.   | BMB  |
| <b>Total:</b> |                 |           | 49.409        | 25.289          | 100.00        | 0.000  |      |

## Enantioenriched 2j

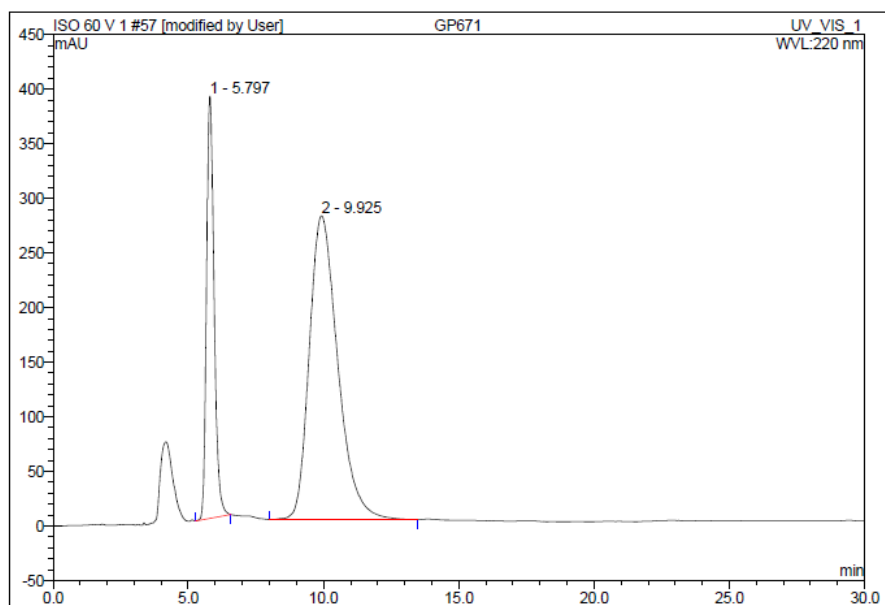

| No.           | Ret.Time<br>min | Peak Name | Height<br>mAU | Area<br>mAU*min | Rel.Area<br>% | Amount | Type |
|---------------|-----------------|-----------|---------------|-----------------|---------------|--------|------|
| 1             | 5.80            | n.a.      | 386.569       | 125.565         | 26.97         | n.a.   | BMB* |
| 2             | 9.92            | n.a.      | 278.305       | 339.956         | 73.03         | n.a.   | BMB* |
| <b>Total:</b> |                 |           | 664.874       | 465.521         | 100.00        | 0.000  |      |

## Racemic 2k

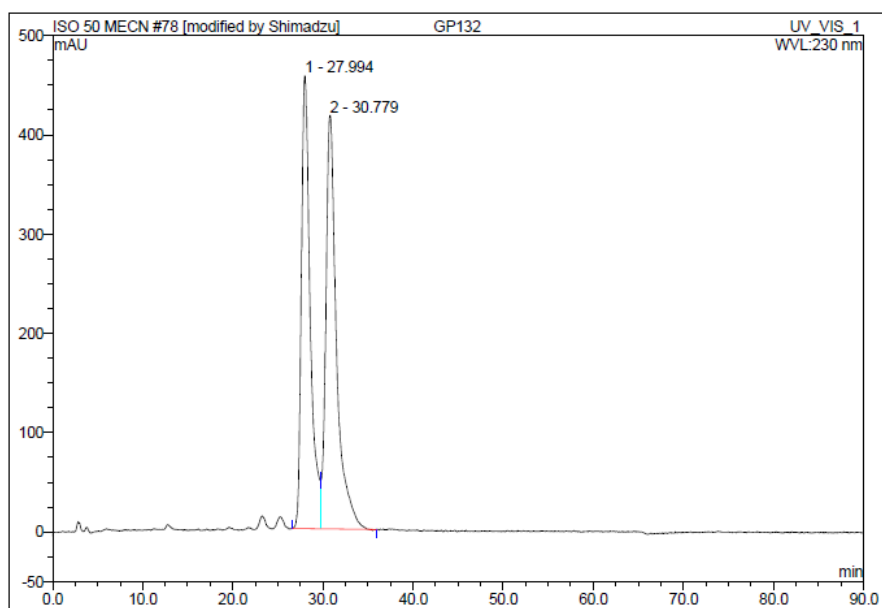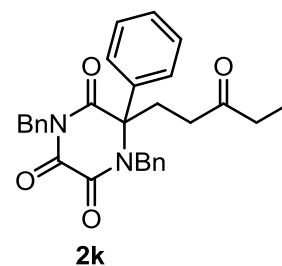

| No.           | Ret.Time<br>min | Peak Name | Height<br>mAU | Area<br>mAU*min | Rel.Area<br>% | Amount | Type |
|---------------|-----------------|-----------|---------------|-----------------|---------------|--------|------|
| 1             | 27.99           | n.a.      | 456.057       | 518.128         | 47.41         | n.a.   | BM * |
| 2             | 30.78           | n.a.      | 416.599       | 574.848         | 52.59         | n.a.   | MB*  |
| <b>Total:</b> |                 |           | 872.656       | 1092.976        | 100.00        | 0.000  |      |

## Enantioenriched 2k

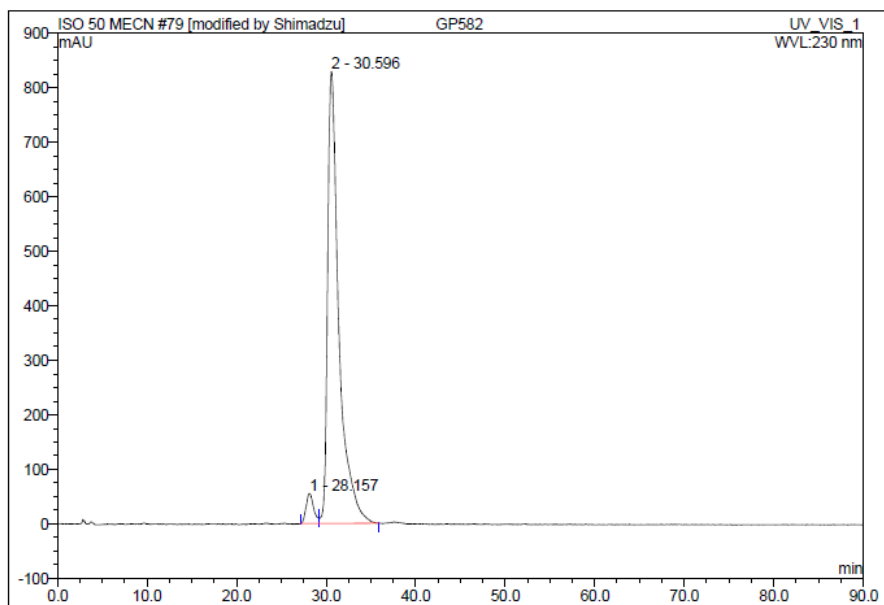

| No.           | Ret.Time<br>min | Peak Name | Height<br>mAU | Area<br>mAU*min | Rel.Area<br>% | Amount | Type |
|---------------|-----------------|-----------|---------------|-----------------|---------------|--------|------|
| 1             | 28.16           | n.a.      | 54.747        | 53.896          | 4.28          | n.a.   | BM * |
| 2             | 30.60           | n.a.      | 828.738       | 1205.445        | 95.72         | n.a.   | MB*  |
| <b>Total:</b> |                 |           | 883.485       | 1259.341        | 100.00        | 0.000  |      |

## Racemic 2I

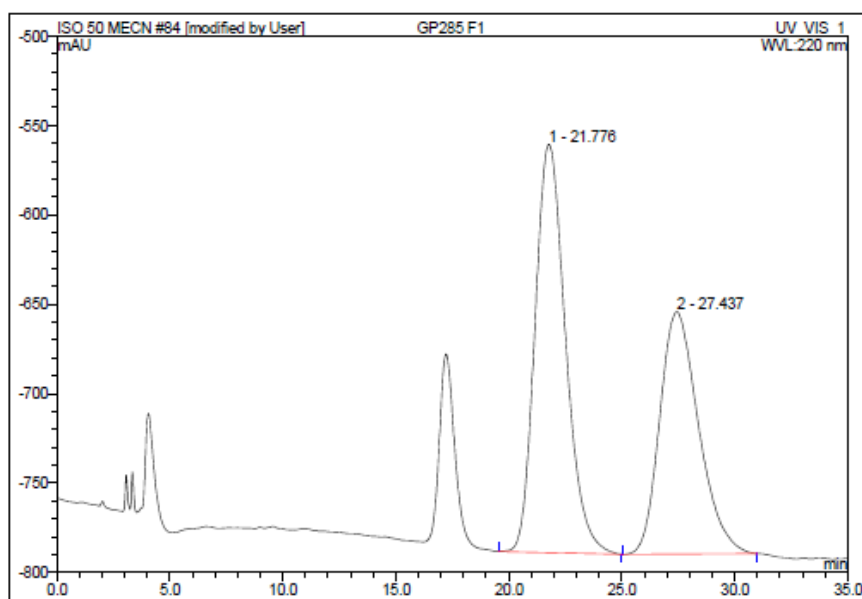

| No.           | Ret.Time<br>min | Peak Name | Height<br>mAU | Area<br>mAU*min | Rel.Area<br>% | Amount | Type |
|---------------|-----------------|-----------|---------------|-----------------|---------------|--------|------|
| 1             | 21.78           | n.a.      | 228.350       | 356.991         | 56.96         | n.a.   | BMB  |
| 2             | 27.44           | n.a.      | 135.520       | 269.763         | 43.04         | n.a.   | BMB  |
| <b>Total:</b> |                 |           | 363.870       | 626.754         | 100.00        | 0.000  |      |

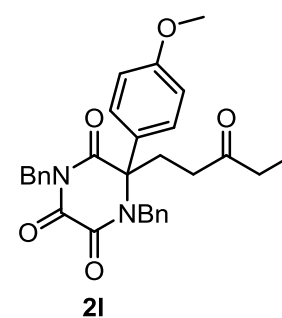

## Enantioenriched 2I

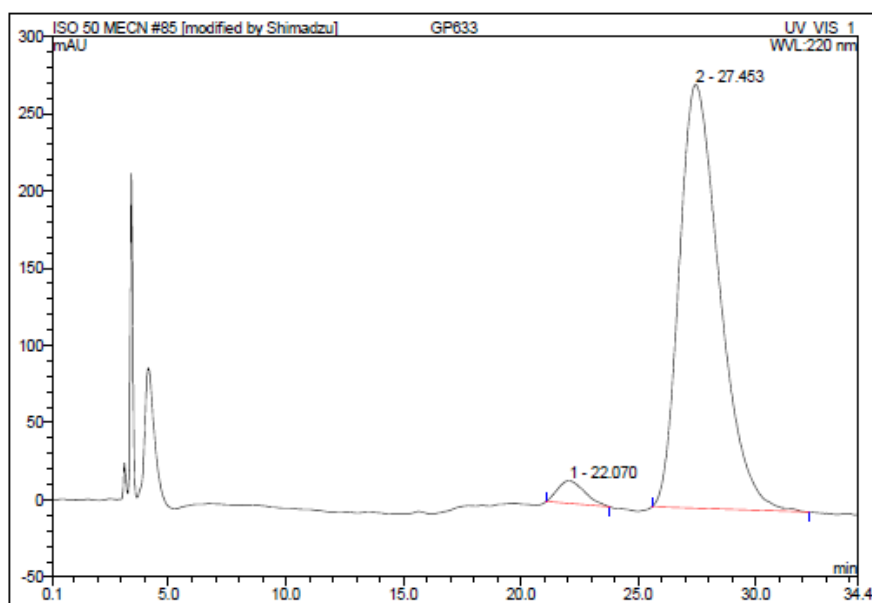

| No.           | Ret.Time<br>min | Peak Name | Height<br>mAU | Area<br>mAU*min | Rel.Area<br>% | Amount | Type |
|---------------|-----------------|-----------|---------------|-----------------|---------------|--------|------|
| 1             | 22.07           | n.a.      | 14.675        | 19.493          | 3.45          | n.a.   | BMB* |
| 2             | 27.45           | n.a.      | 274.201       | 546.040         | 96.55         | n.a.   | BMB* |
| <b>Total:</b> |                 |           | 288.876       | 565.534         | 100.00        | 0.000  |      |

## Racemic 2m

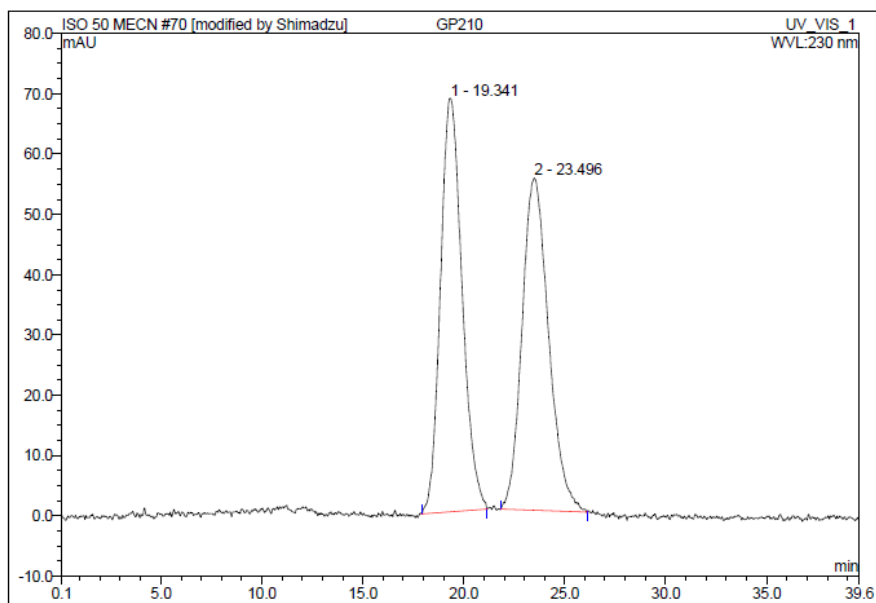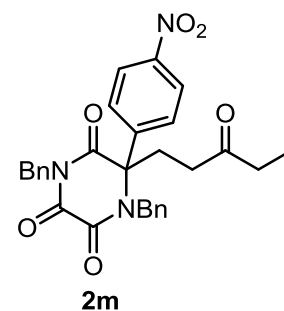

| No.           | Ret.Time<br>min | Peak Name | Height<br>mAU | Area<br>mAU*min | Rel.Area<br>% | Amount | Type |
|---------------|-----------------|-----------|---------------|-----------------|---------------|--------|------|
| 1             | 19.34           | n.a.      | 68.582        | 85.180          | 50.35         | n.a.   | BMB  |
| 2             | 23.50           | n.a.      | 55.127        | 83.995          | 49.65         | n.a.   | BMB* |
| <b>Total:</b> |                 |           | 123.708       | 169.175         | 100.00        | 0.000  |      |

## Enantioenriched 2m

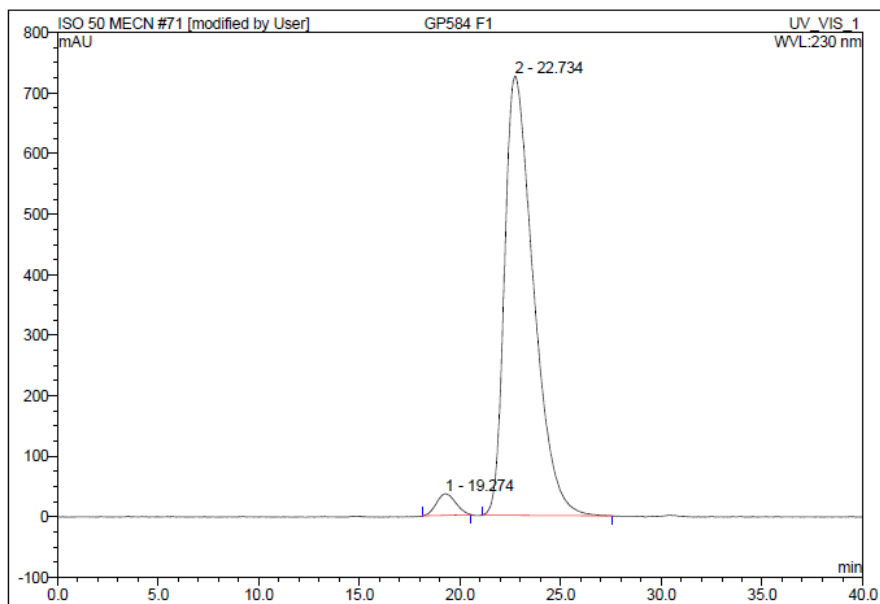

| No.           | Ret.Time<br>min | Peak Name | Height<br>mAU | Area<br>mAU*min | Rel.Area<br>% | Amount | Type |
|---------------|-----------------|-----------|---------------|-----------------|---------------|--------|------|
| 1             | 19.27           | n.a.      | 35.861        | 39.429          | 3.16          | n.a.   | BMB* |
| 2             | 22.73           | n.a.      | 725.399       | 1207.175        | 96.84         | n.a.   | BMB* |
| <b>Total:</b> |                 |           | 761.260       | 1246.603        | 100.00        | 0.000  |      |

## Racemic 2n

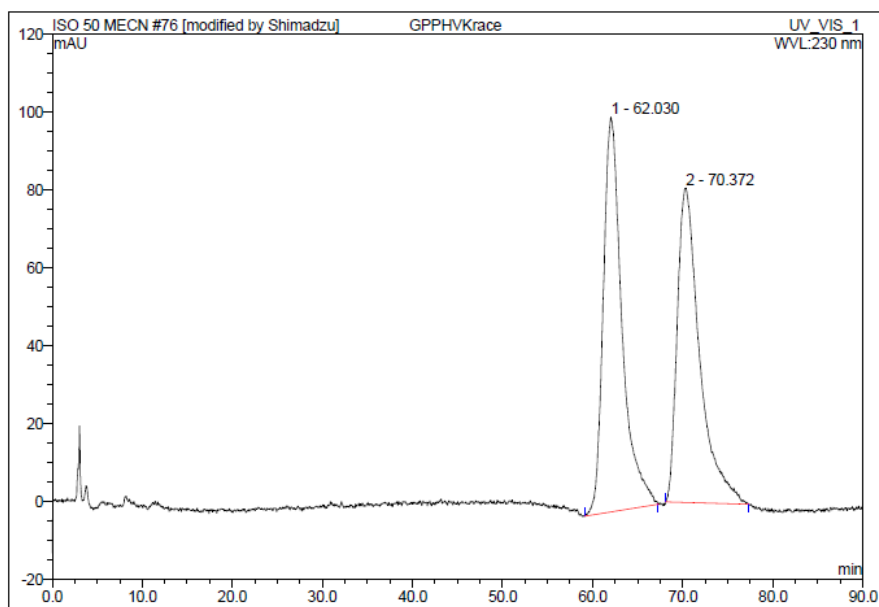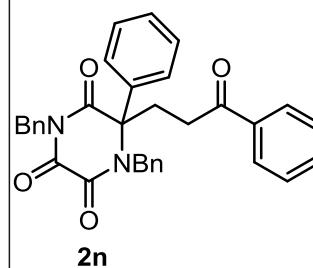

| No.           | Ret.Time min | Peak Name | Height mAU | Area mAU*min | Rel.Area % | Amount | Type |
|---------------|--------------|-----------|------------|--------------|------------|--------|------|
| 1             | 62.03        | n.a.      | 101.474    | 244.752      | 51.33      | n.a.   | BMB* |
| 2             | 70.37        | n.a.      | 80.817     | 232.108      | 48.67      | n.a.   | BMB* |
| <b>Total:</b> |              |           | 182.291    | 476.860      | 100.00     | 0.000  |      |

## Enantioenriched 2n

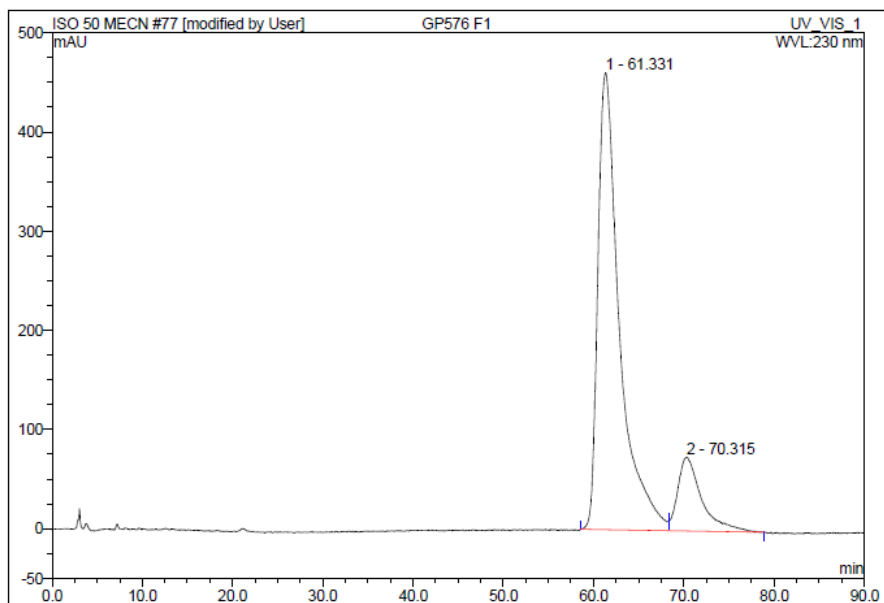

| No.           | Ret.Time min | Peak Name | Height mAU | Area mAU*min | Rel.Area % | Amount | Type |
|---------------|--------------|-----------|------------|--------------|------------|--------|------|
| 1             | 61.33        | n.a.      | 460.948    | 1277.125     | 84.82      | n.a.   | BM * |
| 2             | 70.31        | n.a.      | 74.566     | 228.631      | 15.18      | n.a.   | MB*  |
| <b>Total:</b> |              |           | 535.514    | 1505.755     | 100.00     | 0.000  |      |



## Racemic **2o**

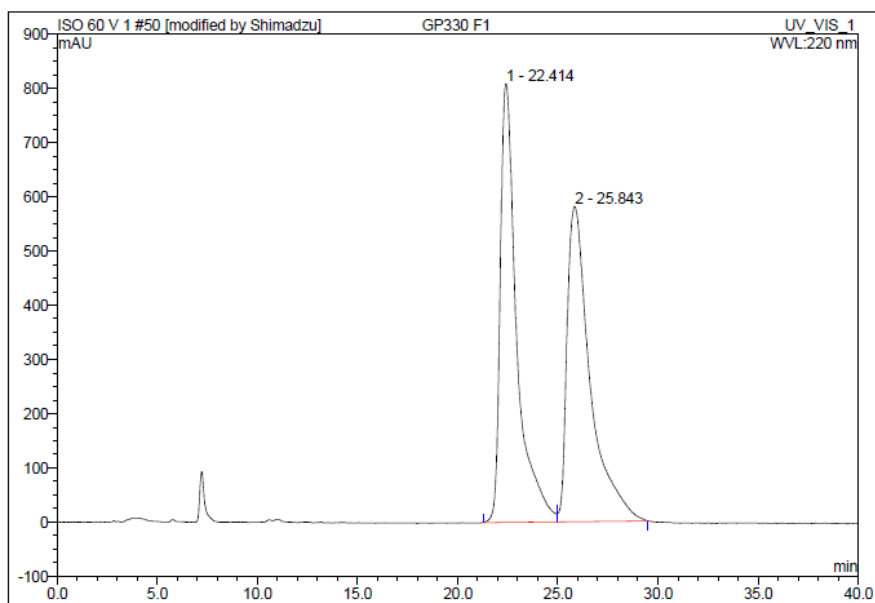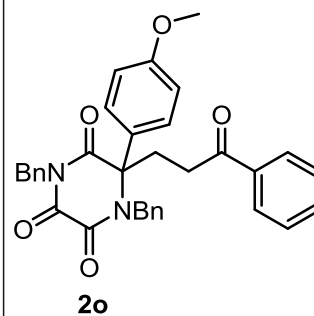

| No.           | Ret.Time<br>min | Peak Name | Height<br>mAU | Area<br>mAU*min | Rel.Area<br>% | Amount | Type |
|---------------|-----------------|-----------|---------------|-----------------|---------------|--------|------|
| 1             | 22.41           | n.a.      | 809.199       | 773.125         | 49.87         | n.a.   | BM   |
| 2             | 25.84           | n.a.      | 581.731       | 777.194         | 50.13         | n.a.   | MB   |
| <b>Total:</b> |                 |           | 1390.930      | 1550.319        | 100.00        | 0.000  |      |

## Enantioenriched **2o**

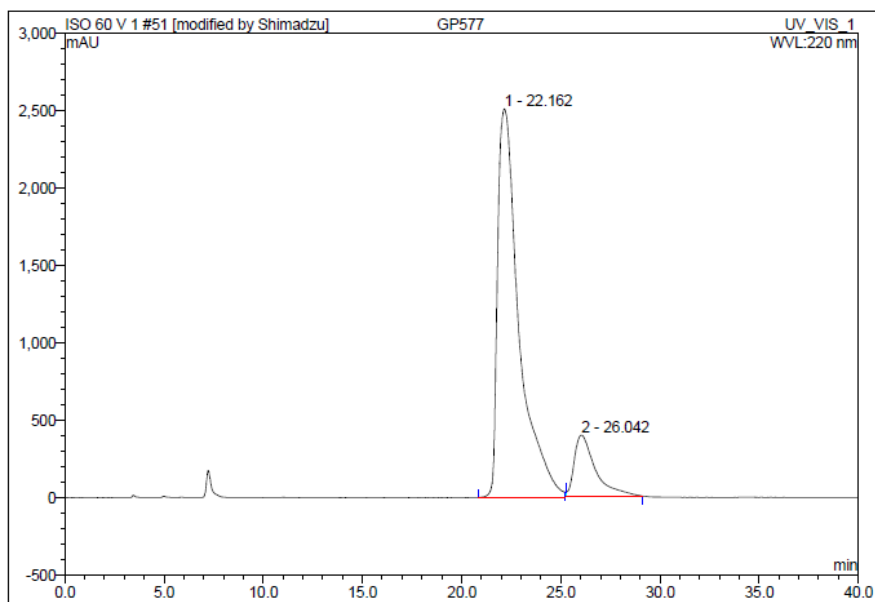

| No.           | Ret.Time<br>min | Peak Name | Height<br>mAU | Area<br>mAU*min | Rel.Area<br>% | Amount | Type |
|---------------|-----------------|-----------|---------------|-----------------|---------------|--------|------|
| 1             | 22.16           | n.a.      | 2511.561      | 3130.746        | 86.65         | n.a.   | BM * |
| 2             | 26.04           | n.a.      | 392.916       | 482.445         | 13.35         | n.a.   | MB*  |
| <b>Total:</b> |                 |           | 2904.477      | 3613.191        | 100.00        | 0.000  |      |

## Racemic 2p

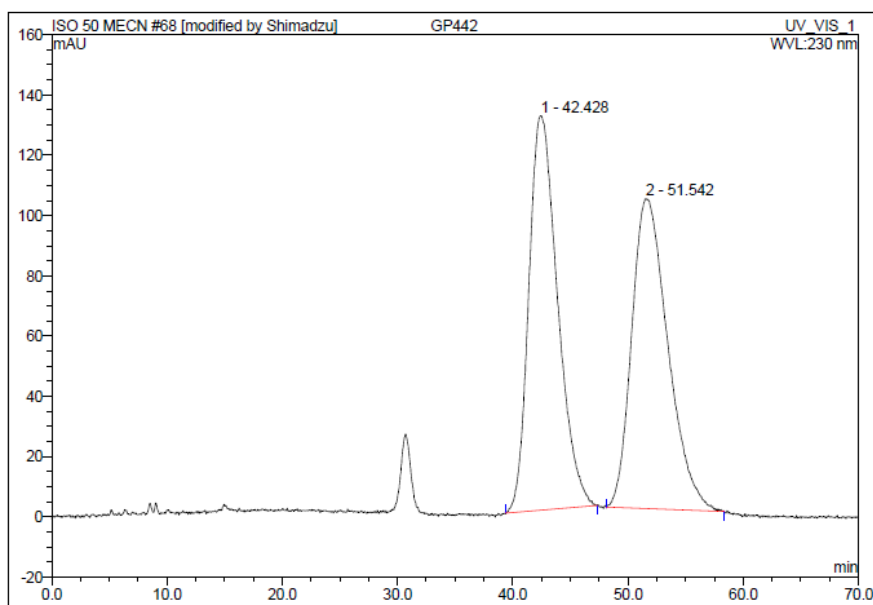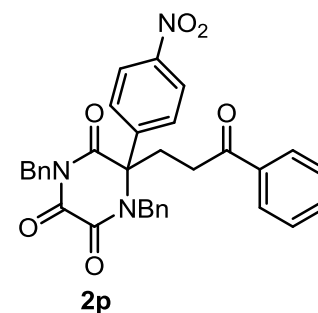

| No.           | Ret. Time<br>min | Peak Name | Height<br>mAU | Area<br>mAU*min | Rel. Area<br>% | Amount | Type |
|---------------|------------------|-----------|---------------|-----------------|----------------|--------|------|
| 1             | 42.43            | n.a.      | 130.933       | 378.436         | 50.31          | n.a.   | BMB* |
| 2             | 51.54            | n.a.      | 102.868       | 373.771         | 49.69          | n.a.   | BMB* |
| <b>Total:</b> |                  |           | 233.802       | 752.207         | 100.00         | 0.000  |      |

## Enantioenriched 2p

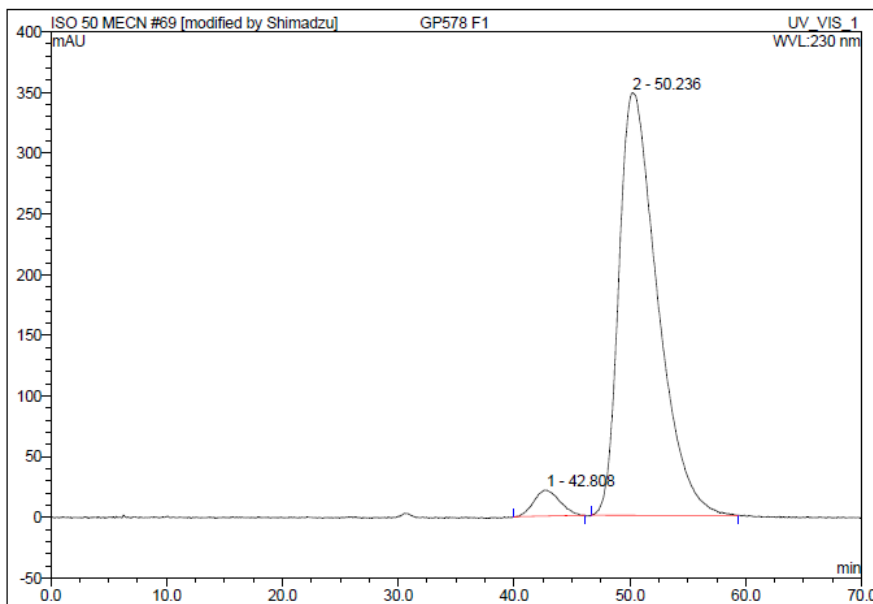

| No.           | Ret. Time<br>min | Peak Name | Height<br>mAU | Area<br>mAU*min | Rel. Area<br>% | Amount | Type |
|---------------|------------------|-----------|---------------|-----------------|----------------|--------|------|
| 1             | 42.81            | n.a.      | 21.362        | 54.970          | 3.93           | n.a.   | BMB* |
| 2             | 50.24            | n.a.      | 348.274       | 1343.057        | 96.07          | n.a.   | BMB* |
| <b>Total:</b> |                  |           | 369.636       | 1398.027        | 100.00         | 0.000  |      |

## Racemic S12

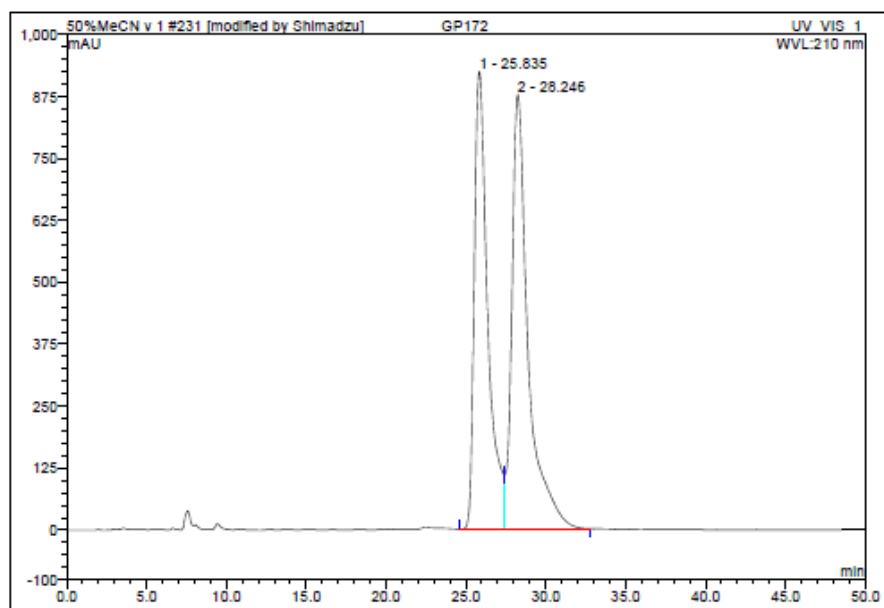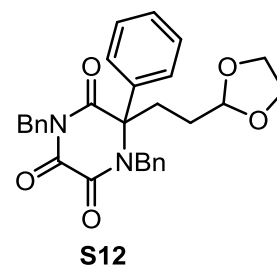

| No.           | Ret.Time<br>min | Peak Name | Height<br>mAU | Area<br>mAU*min | Rel.Area<br>% | Amount | Type |
|---------------|-----------------|-----------|---------------|-----------------|---------------|--------|------|
| 1             | 25.84           | n.a.      | 923.568       | 905.571         | 46.59         | n.a.   | BM * |
| 2             | 28.25           | n.a.      | 876.679       | 1038.263        | 53.41         | n.a.   | M *  |
| <b>Total:</b> |                 |           | 1800.247      | 1943.834        | 100.00        | 0.000  |      |

## Enantioenriched S12

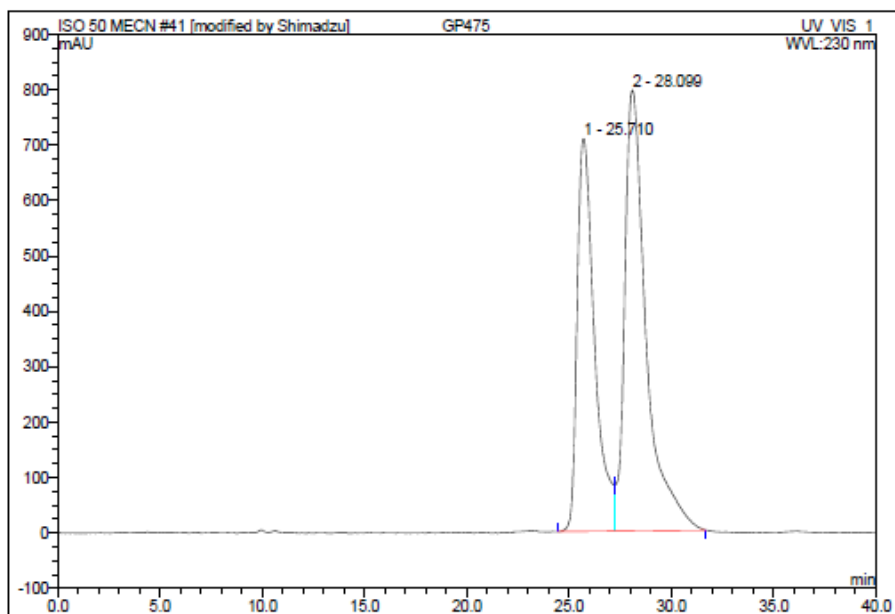

| No.           | Ret.Time<br>min | Peak Name | Height<br>mAU | Area<br>mAU*min | Rel.Area<br>% | Amount | Type |
|---------------|-----------------|-----------|---------------|-----------------|---------------|--------|------|
| 1             | 25.71           | n.a.      | 708.926       | 700.257         | 41.99         | n.a.   | BM   |
| 2             | 28.10           | n.a.      | 795.741       | 967.366         | 58.01         | n.a.   | MB   |
| <b>Total:</b> |                 |           | 1504.667      | 1667.623        | 100.00        | 0.000  |      |

### Racemic 4a

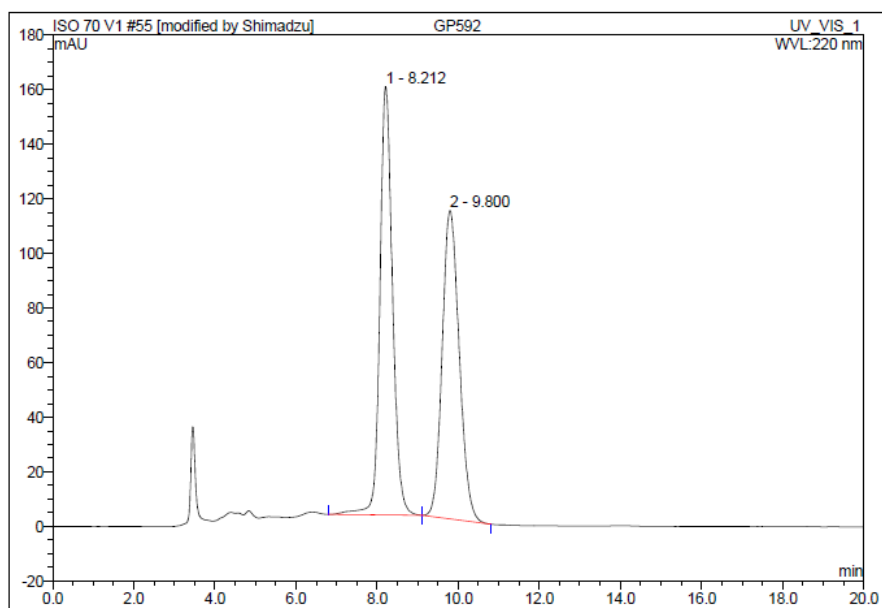

| No.           | Ret.Time min | Peak Name | Height mAU | Area mAU*min | Rel.Area % | Amount | Type |
|---------------|--------------|-----------|------------|--------------|------------|--------|------|
| 1             | 8.21         | n.a.      | 156.872    | 56.766       | 50.82      | n.a.   | BMB  |
| 2             | 9.80         | n.a.      | 112.994    | 54.941       | 49.18      | n.a.   | BMB  |
| <b>Total:</b> |              |           | 269.866    | 111.707      | 100.00     | 0.000  |      |

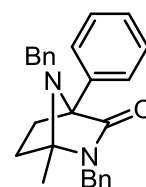

**4a**

### Enantioenriched 4a

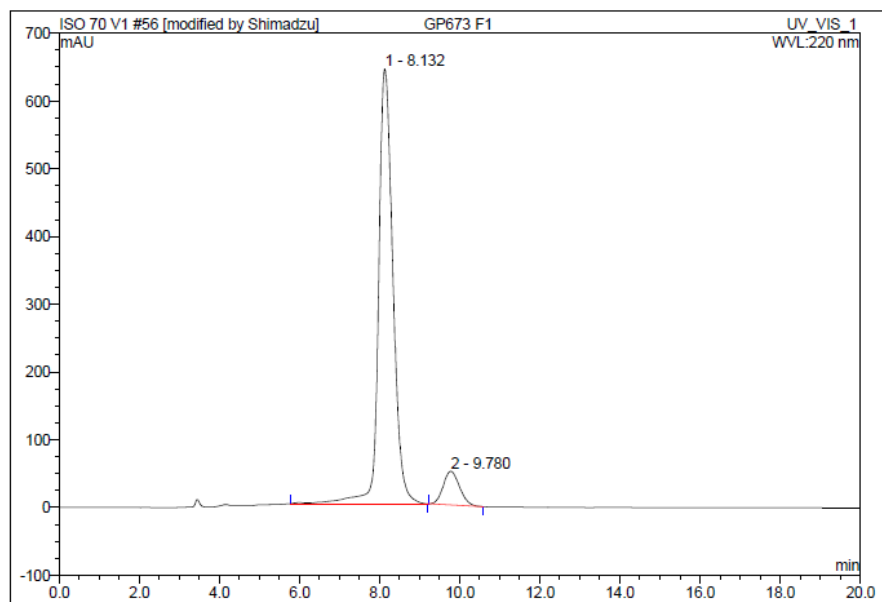

| No.           | Ret.Time min | Peak Name | Height mAU | Area mAU*min | Rel.Area % | Amount | Type |
|---------------|--------------|-----------|------------|--------------|------------|--------|------|
| 1             | 8.13         | n.a.      | 641.599    | 267.022      | 91.89      | n.a.   | MB*  |
| 2             | 9.78         | n.a.      | 49.709     | 23.556       | 8.11       | n.a.   | BMB  |
| <b>Total:</b> |              |           | 691.308    | 290.578      | 100.00     | 0.000  |      |

Enantioenriched sample of **2f** used to generate diazabicyclic **4f**

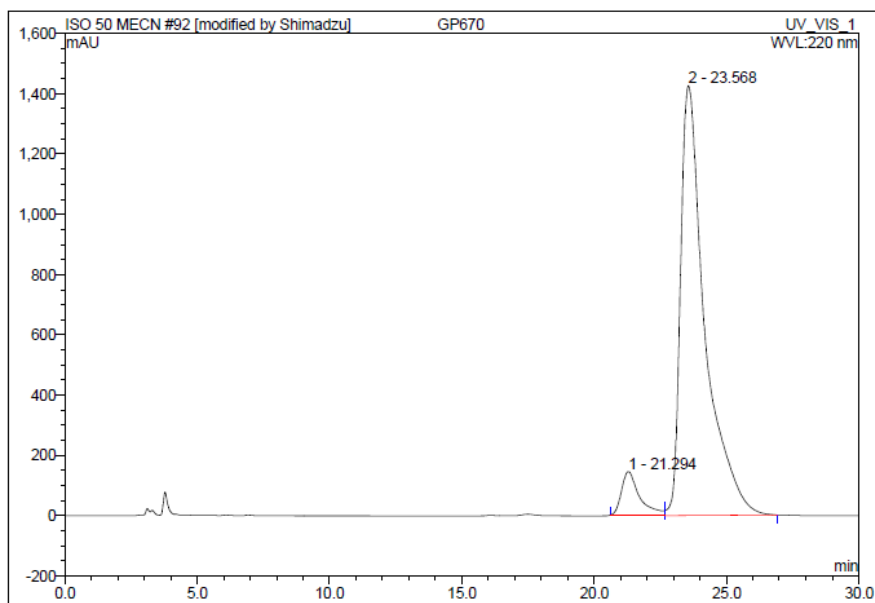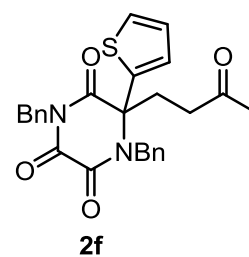

| No.           | Ret. Time<br>min | Peak Name | Height<br>mAU | Area<br>mAU*min | Rel. Area<br>% | Amount | Type |
|---------------|------------------|-----------|---------------|-----------------|----------------|--------|------|
| 1             | 21.29            | n.a.      | 144.430       | 113.348         | 6.95           | n.a.   | BM * |
| 2             | 23.57            | n.a.      | 1426.436      | 1516.427        | 93.05          | n.a.   | MB*  |
| <b>Total:</b> |                  |           | 1570.867      | 1629.776        | 100.00         | 0.000  |      |

## Racemic 4f

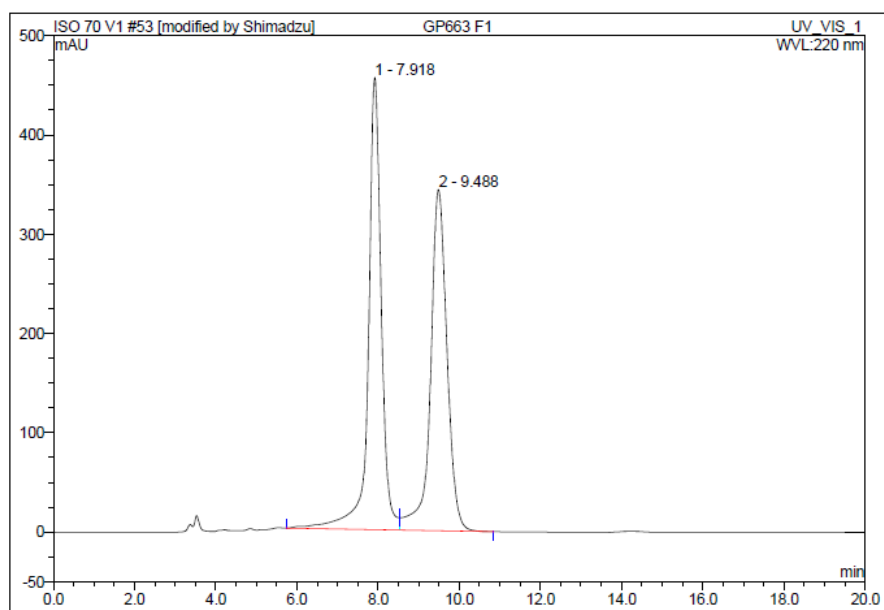

| No.           | Ret.Time min | Peak Name | Height mAU | Area mAU*min | Rel.Area % | Amount | Type |
|---------------|--------------|-----------|------------|--------------|------------|--------|------|
| 1             | 7.92         | n.a.      | 455.326    | 168.503      | 50.97      | n.a.   | BM   |
| 2             | 9.49         | n.a.      | 343.722    | 162.098      | 49.03      | n.a.   | MB   |
| <b>Total:</b> |              |           | 799.047    | 330.601      | 100.00     | 0.000  |      |

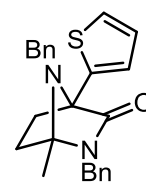

**4f**

## Enantioenriched 4f

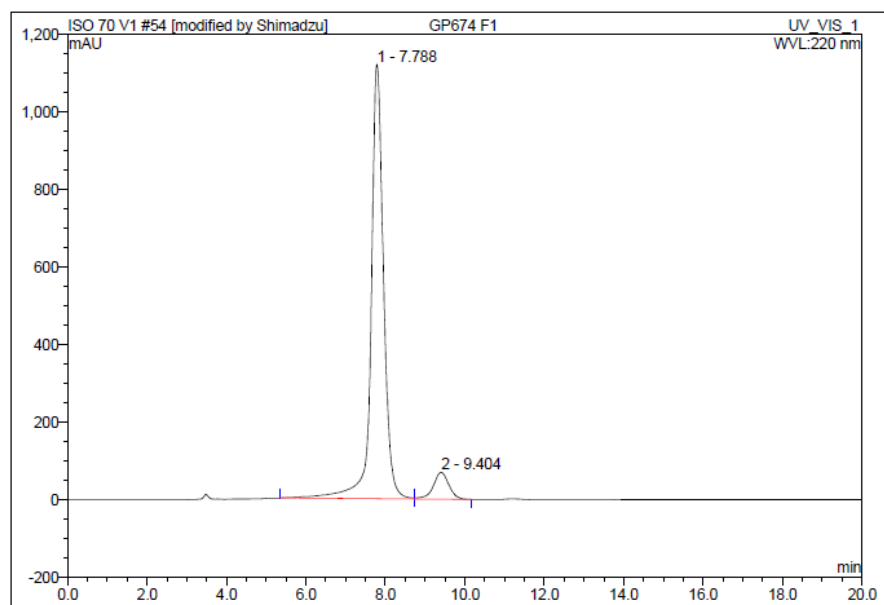

| No.           | Ret.Time min | Peak Name | Height mAU | Area mAU*min | Rel.Area % | Amount | Type |
|---------------|--------------|-----------|------------|--------------|------------|--------|------|
| 1             | 7.79         | n.a.      | 1120.559   | 406.547      | 92.86      | n.a.   | BM * |
| 2             | 9.40         | n.a.      | 69.116     | 31.260       | 7.14       | n.a.   | MB*  |
| <b>Total:</b> |              |           | 1189.675   | 437.807      | 100.00     | 0.000  |      |

## X-ray Crystal Structures

The datasets were measured on an Agilent SuperNova diffractometer using an Atlas detector. The data collections were driven and processed and absorption corrections were applied using CrysAlisPro.<sup>[S1]</sup> The structure of **2f** was solved using ShelXT<sup>[S2]</sup> and that of **4a** was solved using ShelXS<sup>[S3]</sup> and both structures were refined by a full-matrix least-squares procedure on  $F^2$  in ShelXL.<sup>[S4]</sup> All non-hydrogen atoms were refined with anisotropic displacement parameters. All hydrogen atoms were added at calculated positions and refined by use of a riding model with isotropic displacement parameters based on the equivalent isotropic displacement parameter ( $U_{eq}$ ) of the parent atom. Figures and reports were produced using OLEX2.<sup>[S5]</sup>

The structure of **2f** occupies a chiral space group and the absolute structure has been determined from the diffraction data, with the Flack parameter being -0.004 (6).

In **2f** the thiophene ring, C(7)-S(8)-C(9)-C(10)-C(11), (C(7')-S(8')-C(9')-C(10')-C(11')) is disordered over two positions at a refined percentage occupancy ratio of 63.9(3) : 36.1(3).

The structure of **4a** occupies a centrosymmetric space group. Thus in one molecule in the unit cell C(6) is *R* and C(9) is *S* while in the other molecule C(6) is *S* and C(9) is *R*. The relative stereochemistry is the same in all molecules.

The CIFs for the crystal structures of **2f** and **4a** have been deposited with the CCDC and have been given the deposition numbers: CCDC 1880502 and CCDC 1880503 respectively.

Crystal structure determination of **2f**:

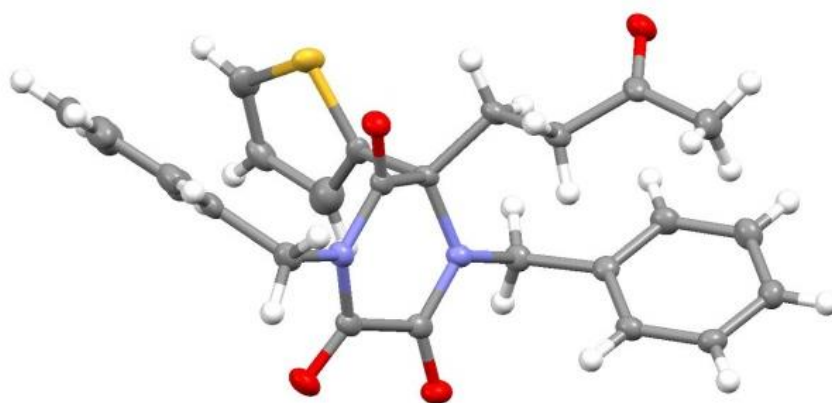

**Crystal Data** for  $C_{26}H_{24}N_2O_4S$  ( $M = 460.53$  g/mol): monoclinic, space group  $P2_1$  (no. 4),  $a = 7.27000(10)$  Å,  $b = 11.16340(10)$  Å,  $c = 14.17310(10)$  Å,  $\beta = 96.9580(10)^\circ$ ,  $V = 1141.79(2)$  Å<sup>3</sup>,  $Z = 2$ ,  $T = 100.01(10)$  K,  $\mu(\text{CuK}\alpha) = 1.556$  mm<sup>-1</sup>,  $D_{calc} = 1.340$  g/cm<sup>3</sup>, 21276 reflections measured ( $12.264^\circ \leq 2\theta \leq 144.218^\circ$ ), 4388 unique ( $R_{int} = 0.0209$ ,  $R_{sigma} = 0.0147$ ) which were used in all calculations. The final  $R_1$  was 0.0227 ( $I > 2\sigma(I)$ ) and  $wR_2$  was 0.0582 (all data). Flack = -0.004(6).

Crystal structure determination of **4a**:

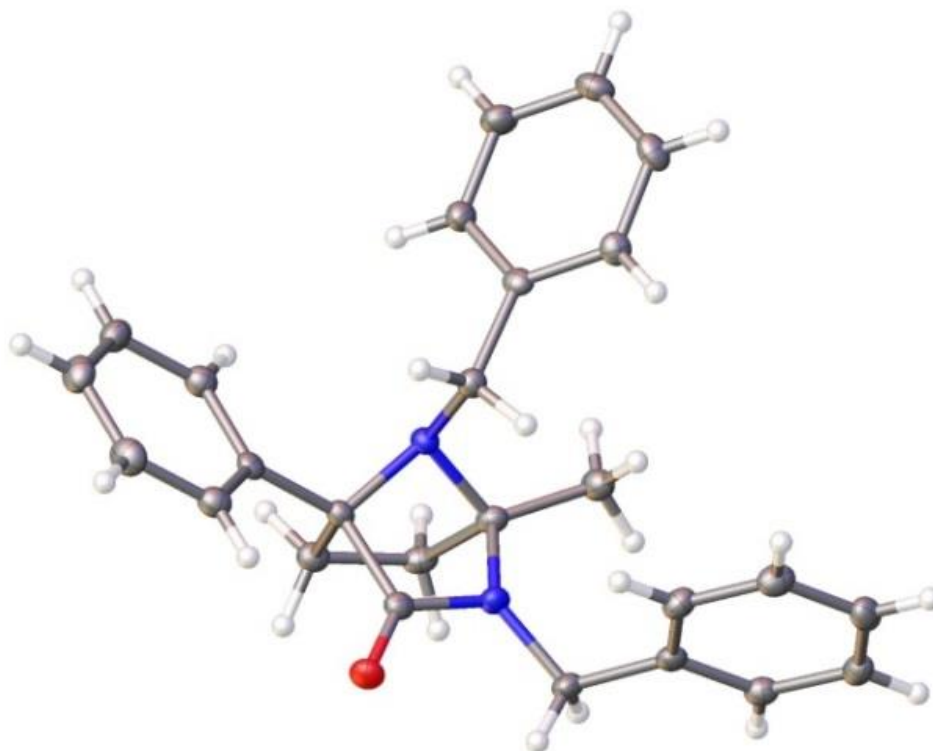

**Crystal Data** for  $C_{26}H_{26}N_2O$  ( $M = 382.49$  g/mol): triclinic, space group P-1 (no. 2),  $a = 9.9803(5)$  Å,  $b = 10.7055(5)$  Å,  $c = 11.0770(7)$  Å,  $\alpha = 76.953(5)^\circ$ ,  $\beta = 64.440(6)^\circ$ ,  $\gamma = 72.474(4)^\circ$ ,  $V = 1011.80(11)$  Å<sup>3</sup>,  $Z = 2$ ,  $T = 100.01(10)$  K,  $\mu(\text{MoK}\alpha) = 0.076$  mm<sup>-1</sup>,  $D_{\text{calc}} = 1.255$  g/cm<sup>3</sup>, 8126 reflections measured ( $7.212^\circ \leq 2\theta \leq 53.462^\circ$ ), 4266 unique ( $R_{\text{int}} = 0.0201$ ,  $R_{\text{sigma}} = 0.0362$ ) which were used in all calculations. The final  $R_1$  was 0.0451 ( $I > 2\sigma(I)$ ) and  $wR_2$  was 0.1063 (all data).

[S1] CrysAlisPro, Agilent Technologies, Version 1.171.36.28, **2013**.

[S2] G. M. Sheldrick, *Acta Cryst.* **2015**, A71, 3-8.

[S3] G. M. Sheldrick, *Acta Cryst.* **2008**, A64, 112-122.

[S4] G. M. Sheldrick, *Acta Cryst.* **2015**, C71, 3-8.

[S5] Dolomanov, O. V.; Bourhis, L. J.; Gildea, R. J.; Howard J. A. K.; Puschmann, H. *J. Appl. Crystallogr.* **2009**, 42, 339-341.
